# Supplementary material for: Theoretical framework for the difference of two negative binomial distributions and its application in comparative analysis of sequencing data
Source: HighWire-hosted journal article supplement (doi:10.1101/gr.278843.123), 2024-10-01
Supplement: Supplemental_Material.docx [file Supplemental_Material.docx]

**Supplementary Material File**

**Theoretical framework for the difference of two negative binomial distributions and its application in comparative analysis of sequencing data**

Alicia Petrany1, Ruoyu Chen2, Shaoqiang Zhang3*, Yong Chen1*

1 Department of Biological and Biomedical Sciences, Rowan University, Glassboro, NJ 08028, USA

2 Moorestown High School, Moorestown, NJ 08057, USA

3 College of Computer and Information Engineering, Tianjin Normal University, Tianjin 300387, China

*To whom correspondence should be addressed: Yong Chen, Tel: +1 856 256 4500 ext. 53589, Email: [chenyong@rowan.edu](mailto:chenyong@rowan.edu); Shaoqiang Zhang, Tel: +86 18649006931, Email: [zhangshaoqiang@tjnu.edu.cn](mailto:zhangshaoqiang@tjnu.edu.cn)

**This file includes Supplementary Table S1-S7, Figure S1-S6.**

**Supplementary Table S1.** Technical summaries of DEG analysis software used in comparative analysis. NB: Negative Binomial, ZINB: Zero-Inflated Negative Binomial. DOTNB: Difference Of Two Negative Binomial.

| **Name** | **Input format** | **Model** | **R Version** | **Reference (PMID)** |
| --- | --- | --- | --- | --- |
| DEGage | Read counts | DOTNB model | 0.1.1 | This study |
| DEsingle | Read counts | ZINB model | 1.14.0 | 29688277 |
| DESeq2 | Read counts | NB model, Exact test | 1.34.0 | 25516281 |
| scDD | TPM/FPKM | Conjugate Dirichlet process mixture | 1.18.0 | 27782827 |
| Monocle2 | TPM/FPKM | Generalized additive model | 2.22.0 | 28114287 |
| edgeR | Read counts | NB model, Exact test | 3.36.0 | 19910308 |

**Supplementary Table S2.** Average performance on simulation data over 10 trials. Mean results are calculated on 10 datasets simulated in ScDD package. Detected DEGs were called with FDR < 0.05.

| **Package** | **Detected DEGS** | **Sensitivity** | **Specificity** | **Precision** | **Accuracy** | **F1** |
| --- | --- | --- | --- | --- | --- | --- |
| DEGage | 2246.2 | 0.812 | 0.965 | 0.723 | 0.950 | 0.765 |
| DEsingle | 2055.5 | 0.730 | 0.967 | 0.712 | 0.943 | 0.721 |
| DESeq2 | 1320.1 | 0.642 | 0.998 | 0.973 | 0.962 | 0.764 |
| EdgeR | 6799.6 | 0.731 | 0.703 | 0.719 | 0.706 | 0.586 |
| Monocle3 | 7483.9 | 0.517 | 0.641 | 0.629 | 0.629 | 0.222 |
| ScDD | 993.8 | 0.482 | 0.998 | 0.970 | 0.946 | 0.644 |
|  | | | | | | |

**Supplementary Table S3**. Results on positive and negative control datasets. Detected DEGs represent the number of genes with FDR < 0.05 returned from each package. Results of negative controls were calculated by the 10 randomly generated real negative control data.

| **Package** | **Positive Control** | | **Negative Control** | |
| --- | --- | --- | --- | --- |
| **Detected DEGS** | **Sensitivity** | **Detected DEGS** | **Specificity** |
| DEGage | 6626 | 0.501 | 198.5 | 0.984 |
| DEsingle | 8629 | 0.610 | 0.1 | 0.999 |
| DESeq2 | 4863 | 0.472 | 378.2 | 0.969 |
| EdgeR | 7245 | 0.467 | 0 | 1 |
| Monocle3 | 3723 | 0.308 | 463.5 | 0.962 |
| ScDD | 1371 | 0.129 | 0 | 1 |

**Supplementary Table S4**. F1 scores of five methods on small imbalanced datasets. The mean scores of 10 runs for each combination of two cell numbers are listed, with standard deviations shown in brackets. DEGage was tested using two sampling strategies: random assignment (RA) and subsampling (SS), which are named DEGage-RA and DEGage-SS, respectively. The highest score for each dataset pair is highlighted in bold.

| **Package** | **DEGage-RA** | **DEGage-SS** | **edgeR** | **DESeq2** | **Wilcoxon** | **GLM.NB** |
| --- | --- | --- | --- | --- | --- | --- |
| **10 vs 10** | **0.5105** (0.0260) | **0.5105** (0.0259) | 0.3410 (0.0066) | 0.2417 (0.0117) | 0.0312 (0.0014) | 0.3591 (0.0125) |
| **25 vs 10** | **0.6612** (0.0296) | 0.6526 (0.0296) | 0.6048 (0.0173) | 0.3575 (0.0115) | 0.2287 (0.0112) | 0.4121 (0.0174) |
| **25 vs 25** | **0.7615** (0.0288) | **0.7615** (0.0289) | 0.6703 (0.0189) | 0.5228 (0.0109) | 0.4404 (0.0241) | 0.4589 (0.0179) |
| **50 vs 10** | **0.7052** (0.0323) | 0.6919 (0.0301) | 0.6837 (0.0194) | 0.6720 (0.0271) | 0.3486 (0.0158) | 0.4611 (0.0166) |
| **50 vs 25** | **0.7797** (0.0238) | 0.7769 (0.0242) | 0.7612 (0.0158) | 0.7515 (0.0274) | 0.5379 (0.0331) | 0.5168 (0.0145) |
| **50 vs 50** | **0.8274** (0.0146) | **0.8274** (0.0146) | 0.8034 (0.0145) | 0.7639 (0.0183) | 0.6357 (0.0398) | 0.5495 (0.0111) |
| **100 vs 10** | **0.7201** (0.0318) | 0.7153 (0.0298) | 0.7137 (0.0193) | 0.6788 (0.0285) | 0.3761 (0.0185) | 0.5019 (0.0125) |
| **100 vs 25** | **0.8261** (0.0238) | 0.8187 (0.0249) | 0.8133 (0.0171) | 0.7571 (0.0311) | 0.5899 (0.0346) | 0.5609 (0.0091) |
| **100 vs 50** | 0.8275 (0.0152) | 0.8263 (0.0157) | **0.8632** (0.0142) | 0.7662 (0.0231) | 0.7043 (0.0351) | 0.5953 (0.0067) |
| **100 vs 100** | 0.8438 (0.0095) | 0.8438 (0.0094) | **0.8852** (0.0139) | 0.7836 (0.0028) | 0.7756 (0.0329) | 0.6176 (0.0046) |

**Supplementary Table S5**. Sensitivity scores of five methods on small imbalanced datasets. The mean scores of 10 runs for each combination of two cell numbers are listed, with standard deviations shown in brackets. DEGage was tested using two sampling strategies: random assignment (RA) and subsampling (SS), which are named DEGage-RA and DEGage-SS, respectively. The highest score for each dataset pair is highlighted in bold.

| **Package** | **DEGage-RA** | **DEGage-SS** | **edgeR** | **DESeq2** | **Wilcoxon** | **GLM.NB** |
| --- | --- | --- | --- | --- | --- | --- |
| **10 vs 10** | **0.8005** (0.0045) | **0.8005** (0.0044) | 0.3081 (0.0058) | 0.1827 (0.0113) | 0.0163 (0.0007) | 0.7722 (0.0029) |
| **25 vs 10** | 0.8023 (0.0071) | **0.8049** (0.0067) | 0.5723 (0.0145) | 0.2805 (0.0098) | 0.1405 (0.0065) | 0.7796 (0.0157) |
| **25 vs 25** | **0.8061** (0.0045) | **0.8061** (0.0043) | 0.6426 (0.0152) | 0.4456 (0.0093) | 0.3319 (0.0167) | 0.7862 (0.0195) |
| **50 vs 10** | 0.8078 (0.0040) | **0.8089** (0.0044) | 0.6567 (0.0147) | 0.7419 (0.0107) | 0.2391 (0.0101) | 0.7652 (0.0222) |
| **50 vs 25** | 0.8089 (0.0049) | **0.8091** (0.0049) | 0.7432 (0.0102) | 0.7851 (0.0078) | 0.4351 (0.0259) | 0.7964 (0.0192) |
| **50 vs 50** | **0.8097** (0.0042) | **0.8097** (0.0041) | 0.7895 (0.0086) | 0.7904 (0.0037) | 0.5569 (0.0352) | 0.8052 (0.0179) |
| **100 vs 10** | 0.8109 (0.0034) | **0.8137** (0.0035) | 0.6933 (0.0134) | 0.7636 (0.0082) | 0.2603 (0.0121) | 0.7854 (0.0229) |
| **100 vs 25** | 0.8145 (0.0032) | 0.8161 (0.0033) | 0.7952 (0.0098) | **0.8645** (0.0082) | 0.4889 (0.0291) | 0.8144 (0.0171) |
| **100 vs 50** | 0.8207 (0.0019) | 0.8222 (0.0021) | 0.8536 (0.0062) | **0.9068** (0.0057) | 0.6335 (0.0350) | 0.8288 (0.0139) |
| **100 vs 100** | 0.8469 (0.0022) | 0.8469 (0.0021) | 0.8886 (0.0049) | **0.9288** (0.0026) | 0.7282 (0.0348) | 0.8485 (0.0121) |

**Supplementary Table S6**. Specificity scores of five methods on small imbalanced datasets. The mean scores of 10 runs for each combination of two cell numbers are listed, with standard deviations shown in brackets. DEGage was tested using two sampling strategies: random assignment (RA) and subsampling (SS), which are named DEGage-RA and DEGage-SS, respectively. The highest score for each dataset pair is highlighted in bold.

| **Package** | **DEGage-RA** | **DEGage-SS** | **edgeR** | **DESeq2** | **Wilcoxon** | **GLM.NB** | |
| --- | --- | --- | --- | --- | --- | --- | --- |
| **10 vs 10** | 0.7909 (0.0356) | 0.7909 (0.0355) | 0.6171 (0.0520) | 0.9935 (0.0023) | **0.9999** (<0.0001) | | 0.6968 (0.0166) |
| **25 vs 10** | 0.8602 (0.0294) | 0.8568 (0.0283) | 0.8925 (0.0335) | 0.9901 (0.0038) | **0.9996** (<0.0001) | | 0.7581 (0.0036) |
| **25 vs 25** | 0.9599 (0.0118) | 0.9599 (0.0117) | 0.9161 (0.0326) | 0.9897 (0.0040) | **0.9985** (0.0001) | | 0.7866 (0.0029) |
| **50 vs 10** | 0.8738 (0.0273) | 0.8698 (0.0255) | 0.9401 (0.0377) | 0.9174 (0.0218) | **0.9992** (<0.0001) | | 0.7946 (0.0052) |
| **50 vs 25** | 0.9720 (0.0079) | 0.9720 (0.0079) | 0.9875 (0.0091) | 0.9268 (0.0187) | **0.9979** (0.0001) | | 0.8049 (0.0071) |
| **50 vs 50** | 0.9906 (0.0024) | 0.9906 (0.0029) | 0.9874 (0.0091) | 0.9261 (0.0147) | **0.9972** (0.0001) | | 0.8126 (0.0086) |
| **100 vs 10** | 0.8795 (0.0261) | 0.8743 (0.0243) | 0.9770 (0.0191) | 0.9019 (0.0276) | **0.9991** (<0.0001) | | 0.8132 (0.0092) |
| **100 vs 25** | 0.9787 (0.0064) | 0.9746 (0.0074) | 0.9894 (0.0031) | 0.9131 (0.0239) | **0.9977** (0.0001) | | 0.8154 (0.0097) |
| **100 vs 50** | 0.9925 (0.0024) | 0.9916 (0.0026) | 0.9891 (0.0031) | 0.9186 (0.0177) | **0.9969** (0.0002) | | 0.8182 (0.0101) |
| **100 vs 100** | 0.9959 (0.0013) | 0.9959 (0.0013) | 0.9875 (0.0029) | 0.9003 (0.0071) | **0.9963** (0.0002) | | 0.8202 (0.0110) |

**Supplementary Table S7**. The cell numbers of 17 cell types in the Hiedegger et. al dataset (GSE193337). Five cell types with numbers less than 100 are marked in light gray, and those with numbers greater than 1000 are marked in dark gray.

| **Cell Type** | **Number Of Cells** |
| --- | --- |
| HSC CD34+ | 25 |
| Hepatocytes | 26 |
| Pre-B cell CD34- | 33 |
| Neutrophils | 38 |
| Chondrocytes | 83 |
| Fibroblasts | 101 |
| DC | 195 |
| Smooth muscle cells | 360 |
| CMP | 505 |
| Macrophage | 522 |
| Tissue stem cells | 791 |
| B cells | 954 |
| NK cells | 1230 |
| Monocyte | 1563 |
| Endothelial cells | 2380 |
| T cells | 7716 |
| Epithelial cells | 8404 |

**Supplementary Figures**

**
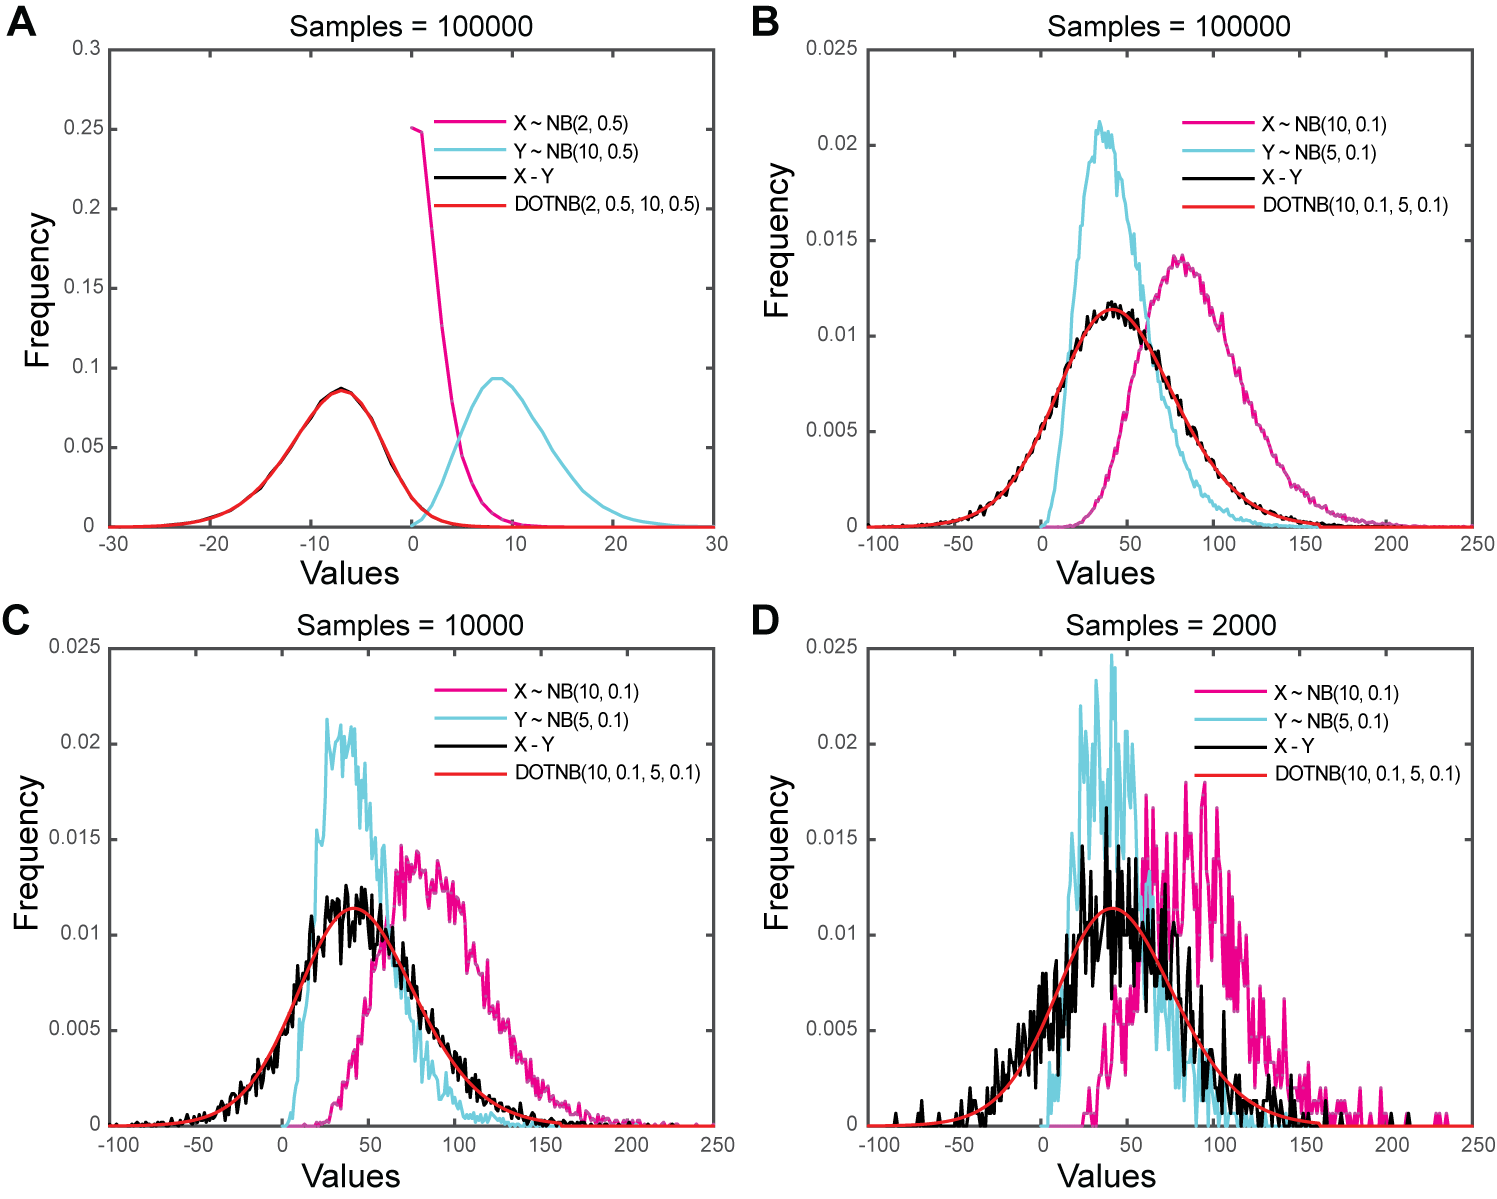
**

**Supplementary Figure S1**. Simulation DOTNB and its theoretical PMF. (A) Histogram of 100,000 samples of from and . Histograms of from and for 100,000 samples (B), 10,000 samples (C) and 2,000 samples (D) respectively.

**
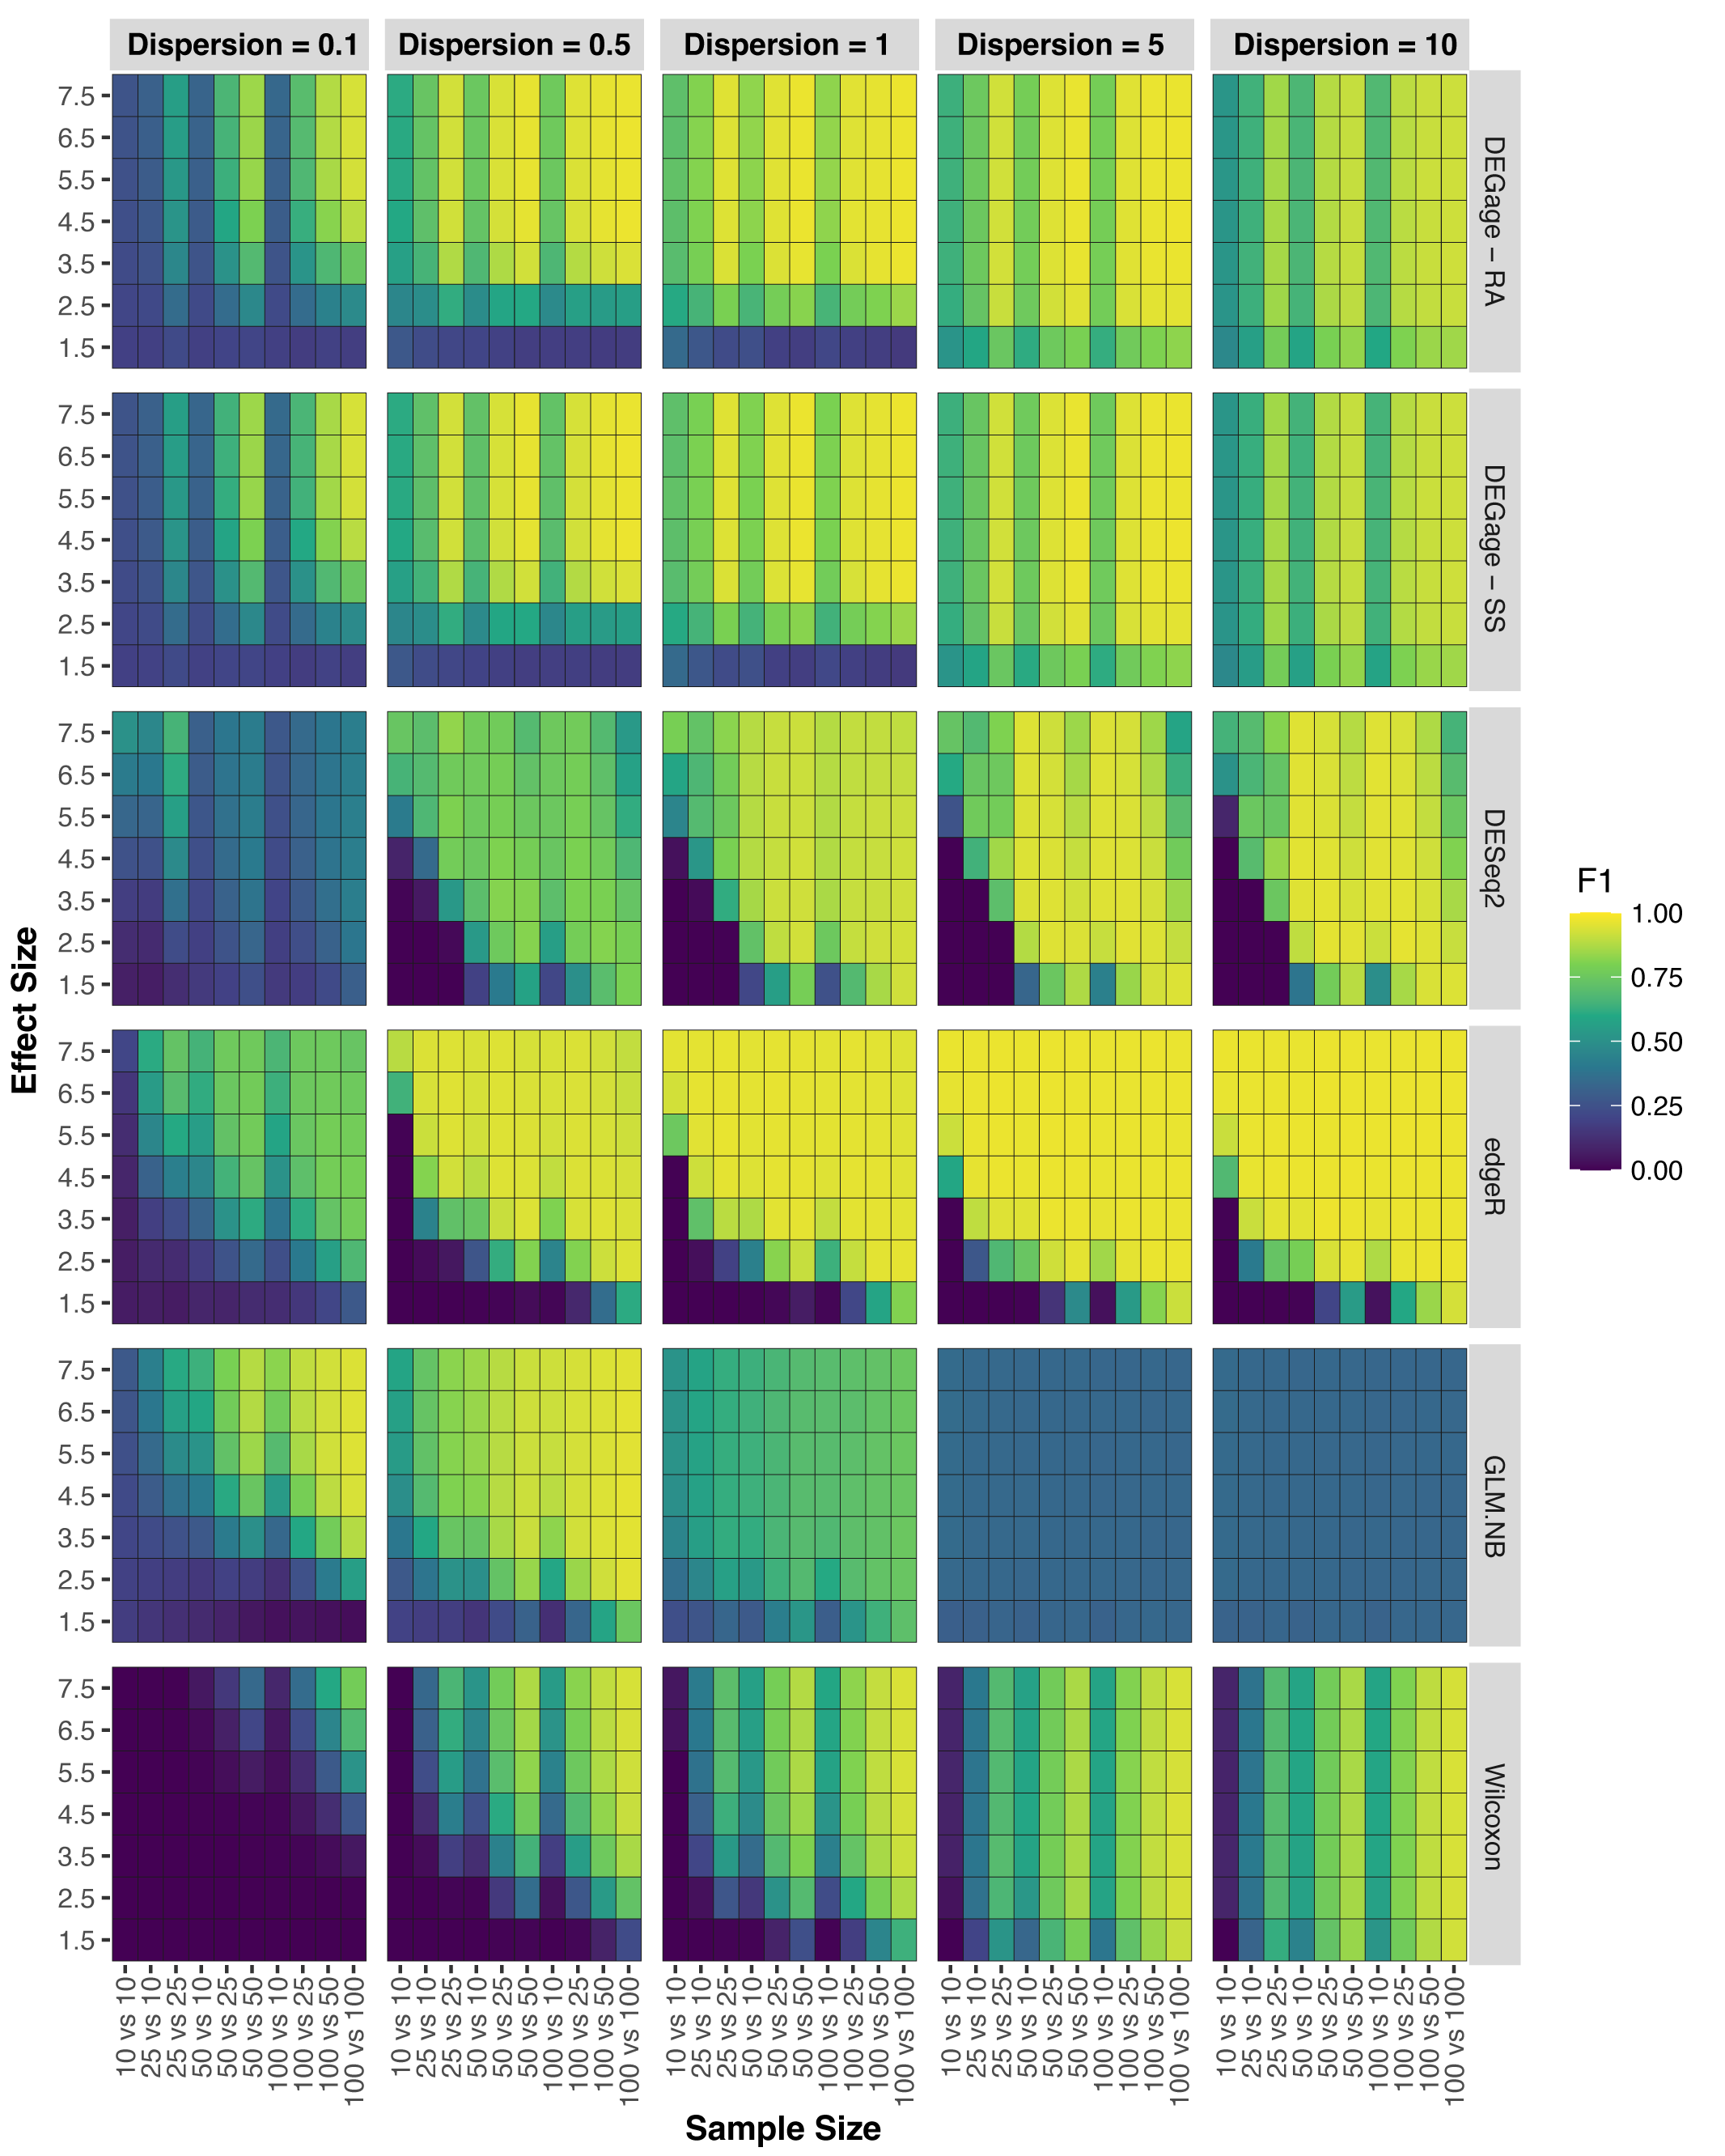
**

**Supplementary Figure S2.** The F1 scores for five methods on different combinations of dispersions, sample sizes and effect sizes. The performance of DEGage was obtained for two sampling strategies: random assignment (RA) and subsampling (SS).

**
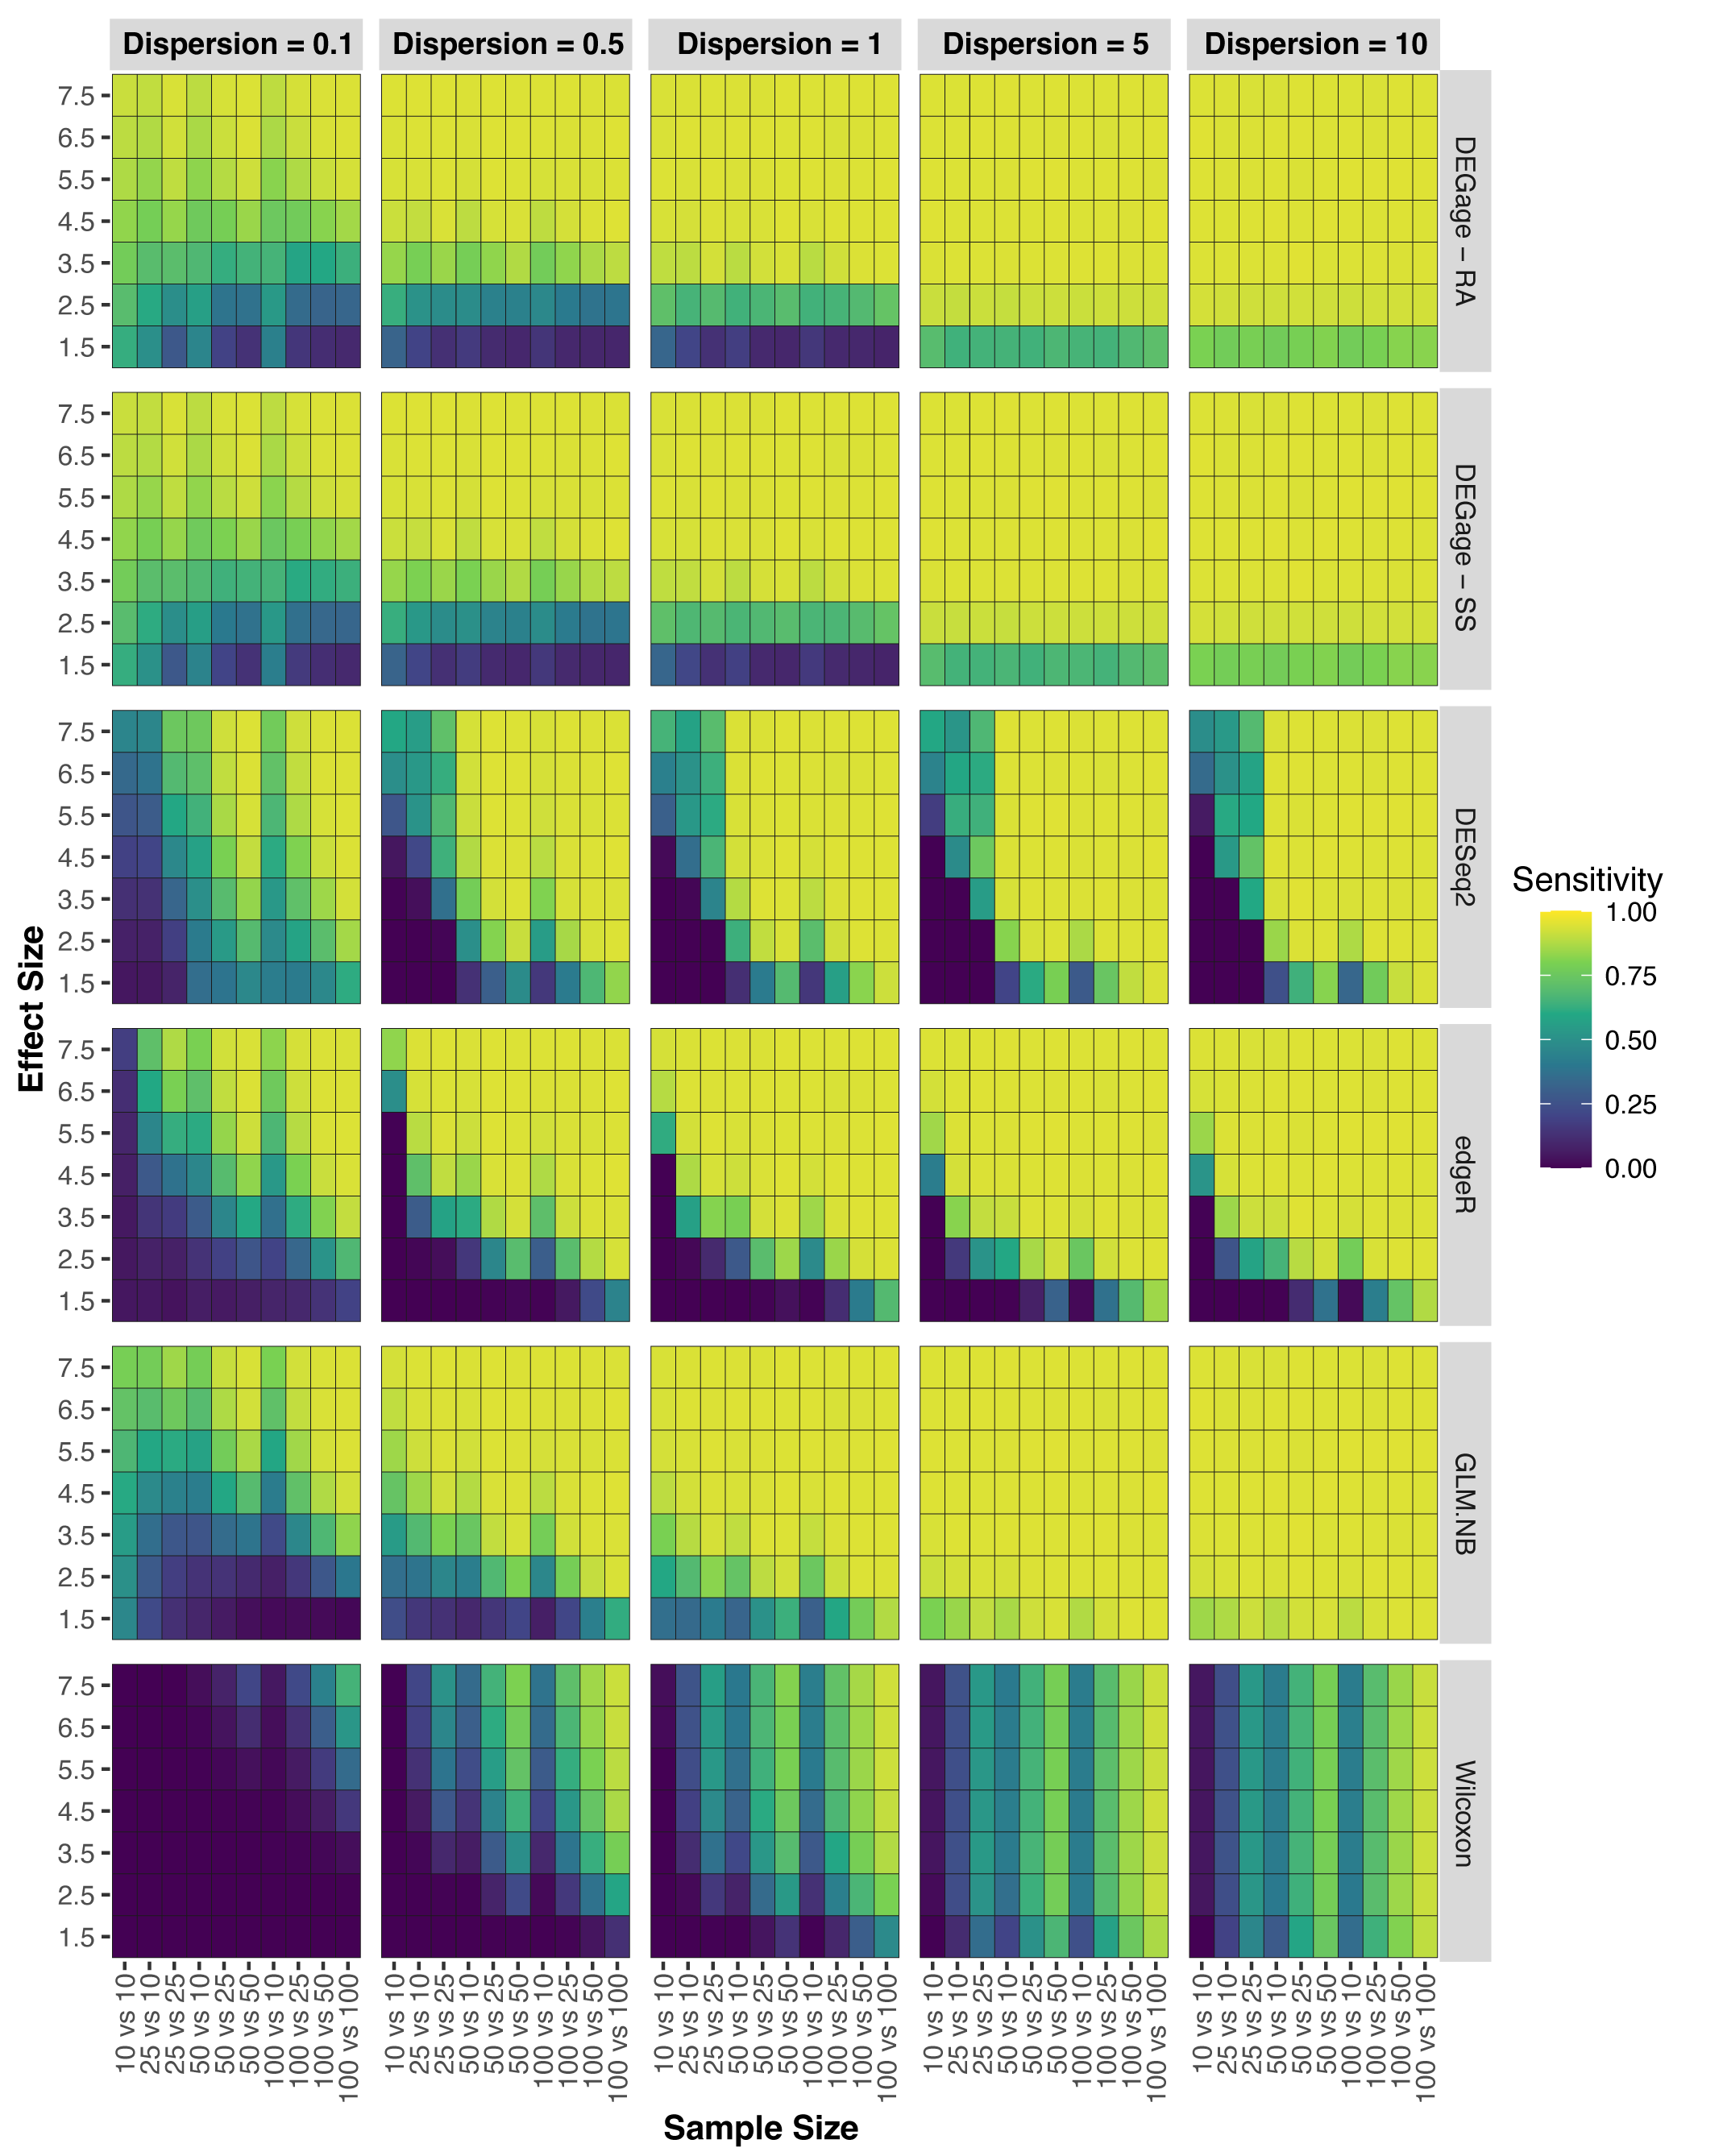
**

**Supplementary Figure S3.** The sensitivity scores for five methods on different combinations of dispersions, sample sizes and effect sizes. The performance of DEGage was obtained for two sampling strategies: random assignment (RA) and subsampling (SS).

**
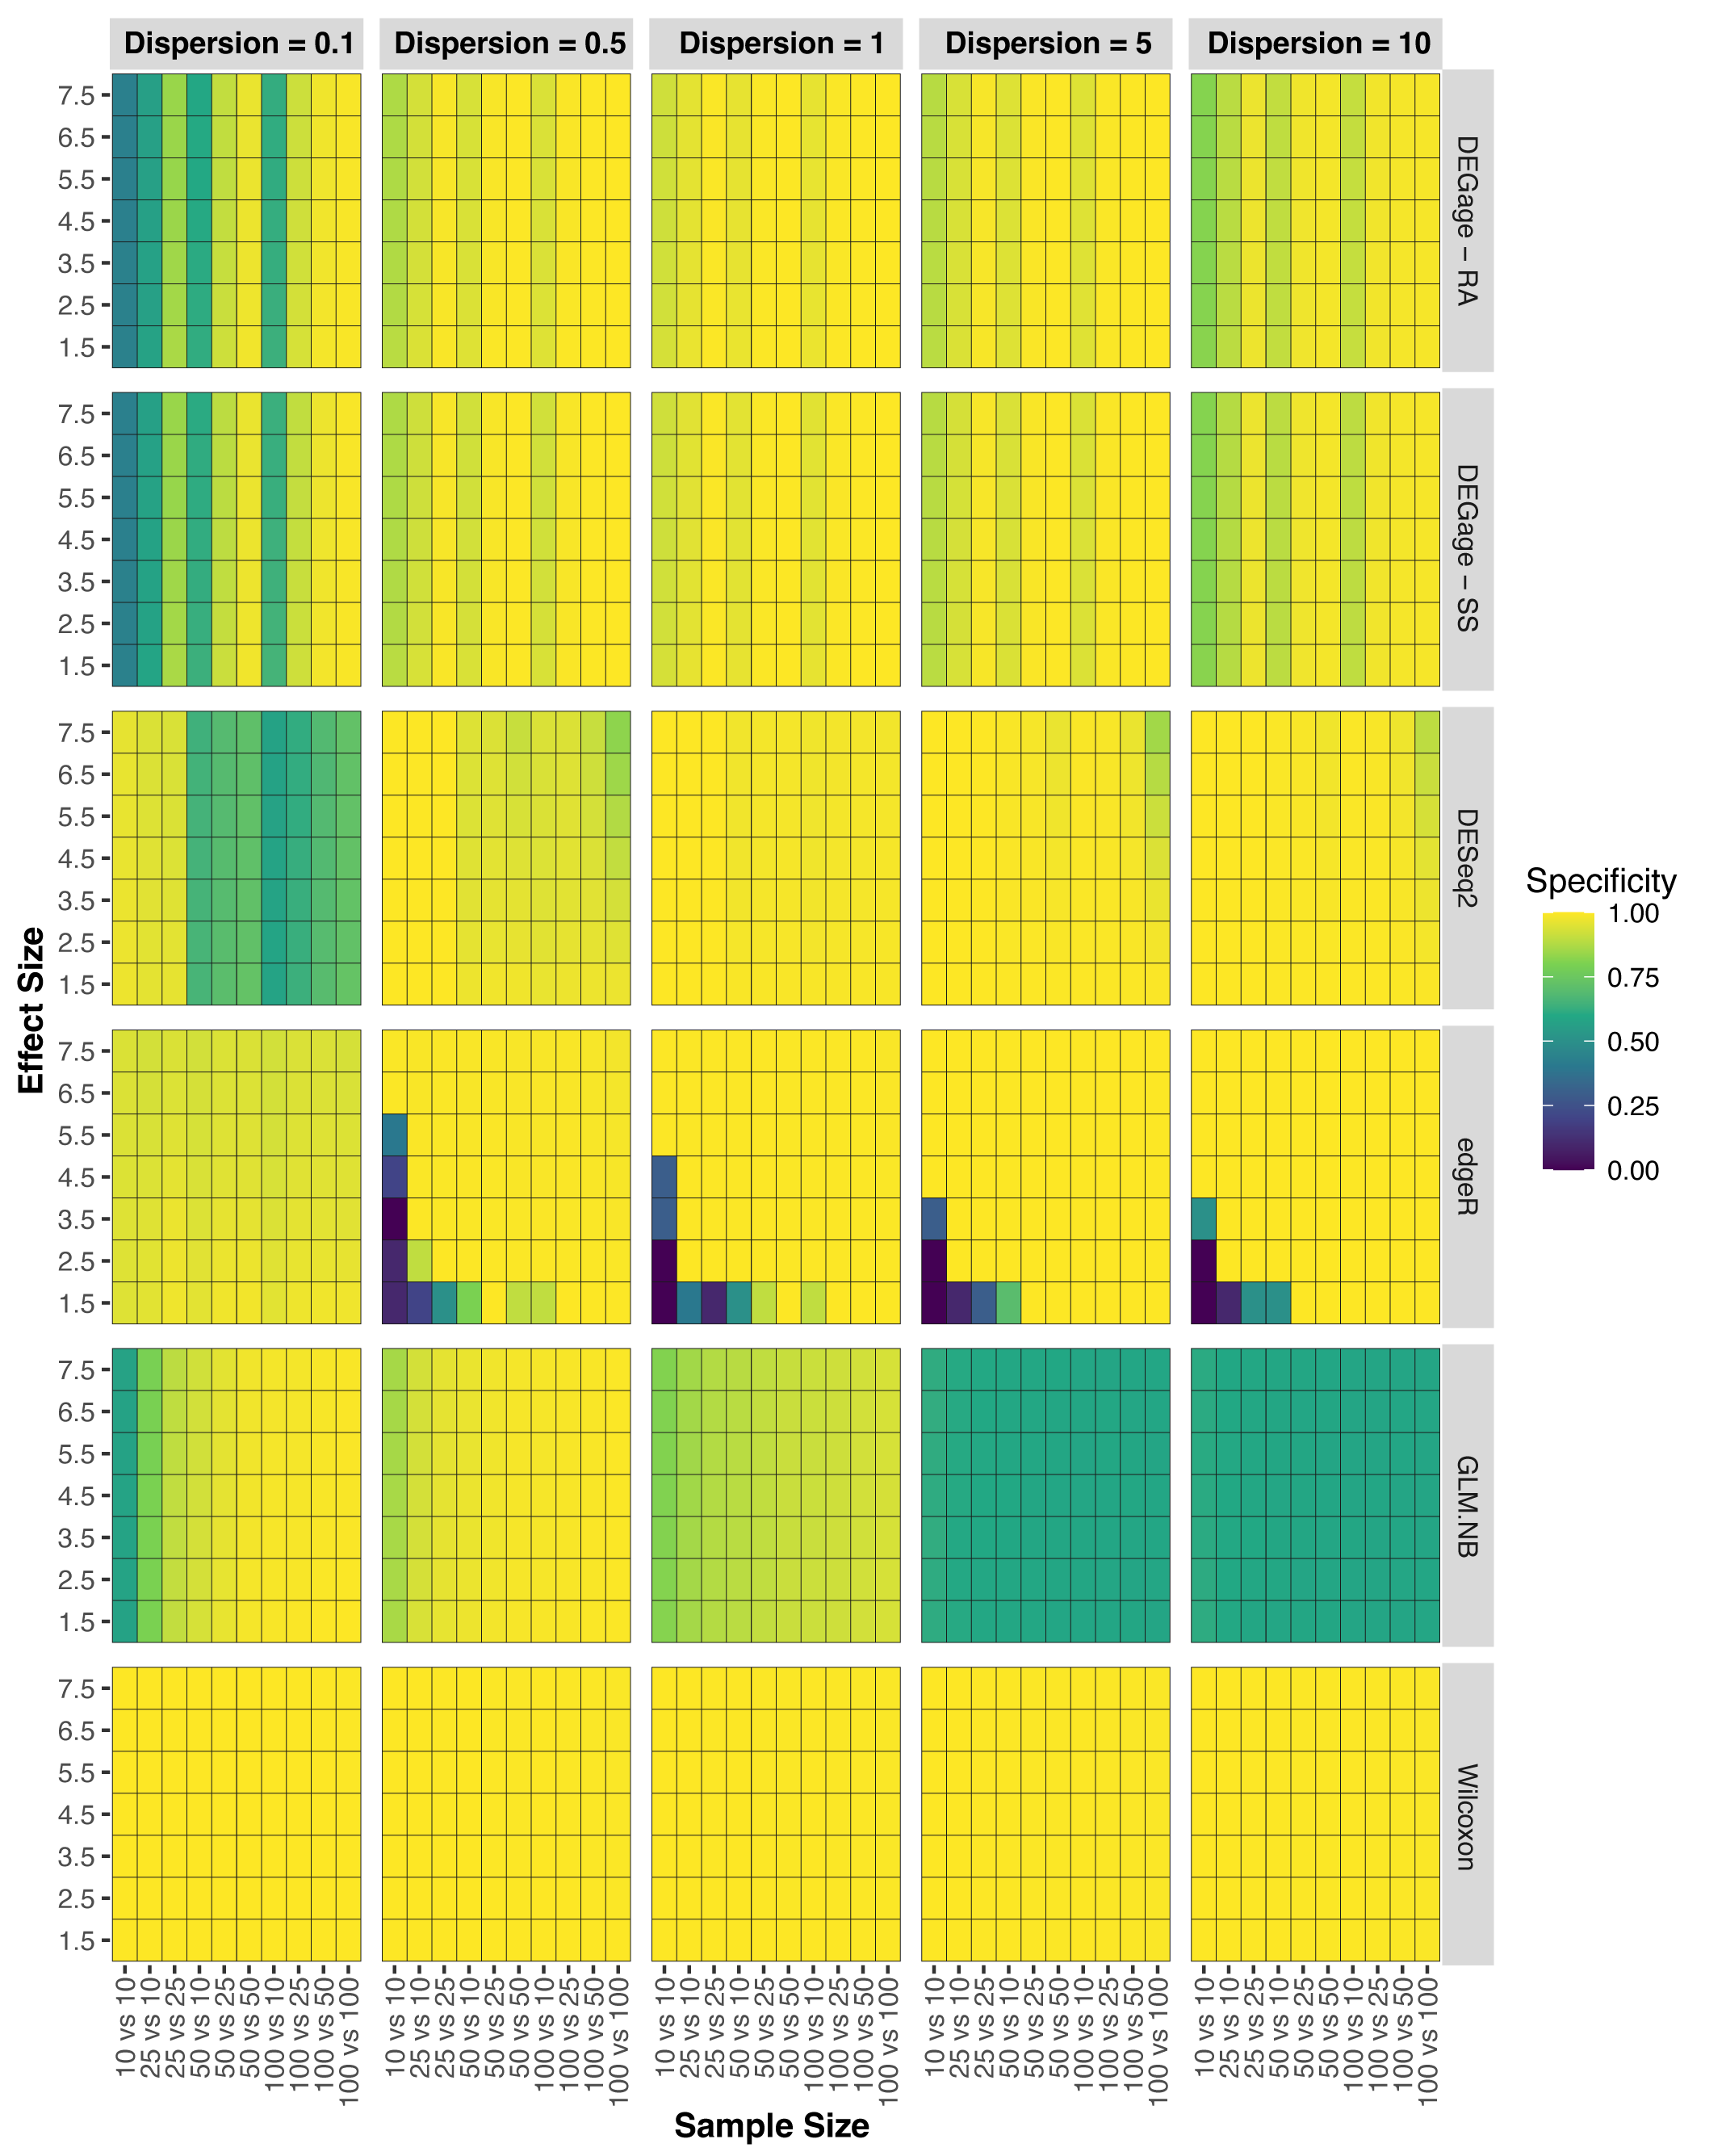
**

**Supplementary Figure S4.** The specificity scores for five methods on different combinations of dispersions, sample sizes and effect sizes. The performance of DEGage was obtained for two sampling strategies: random assignment (RA) and subsampling (SS).

**
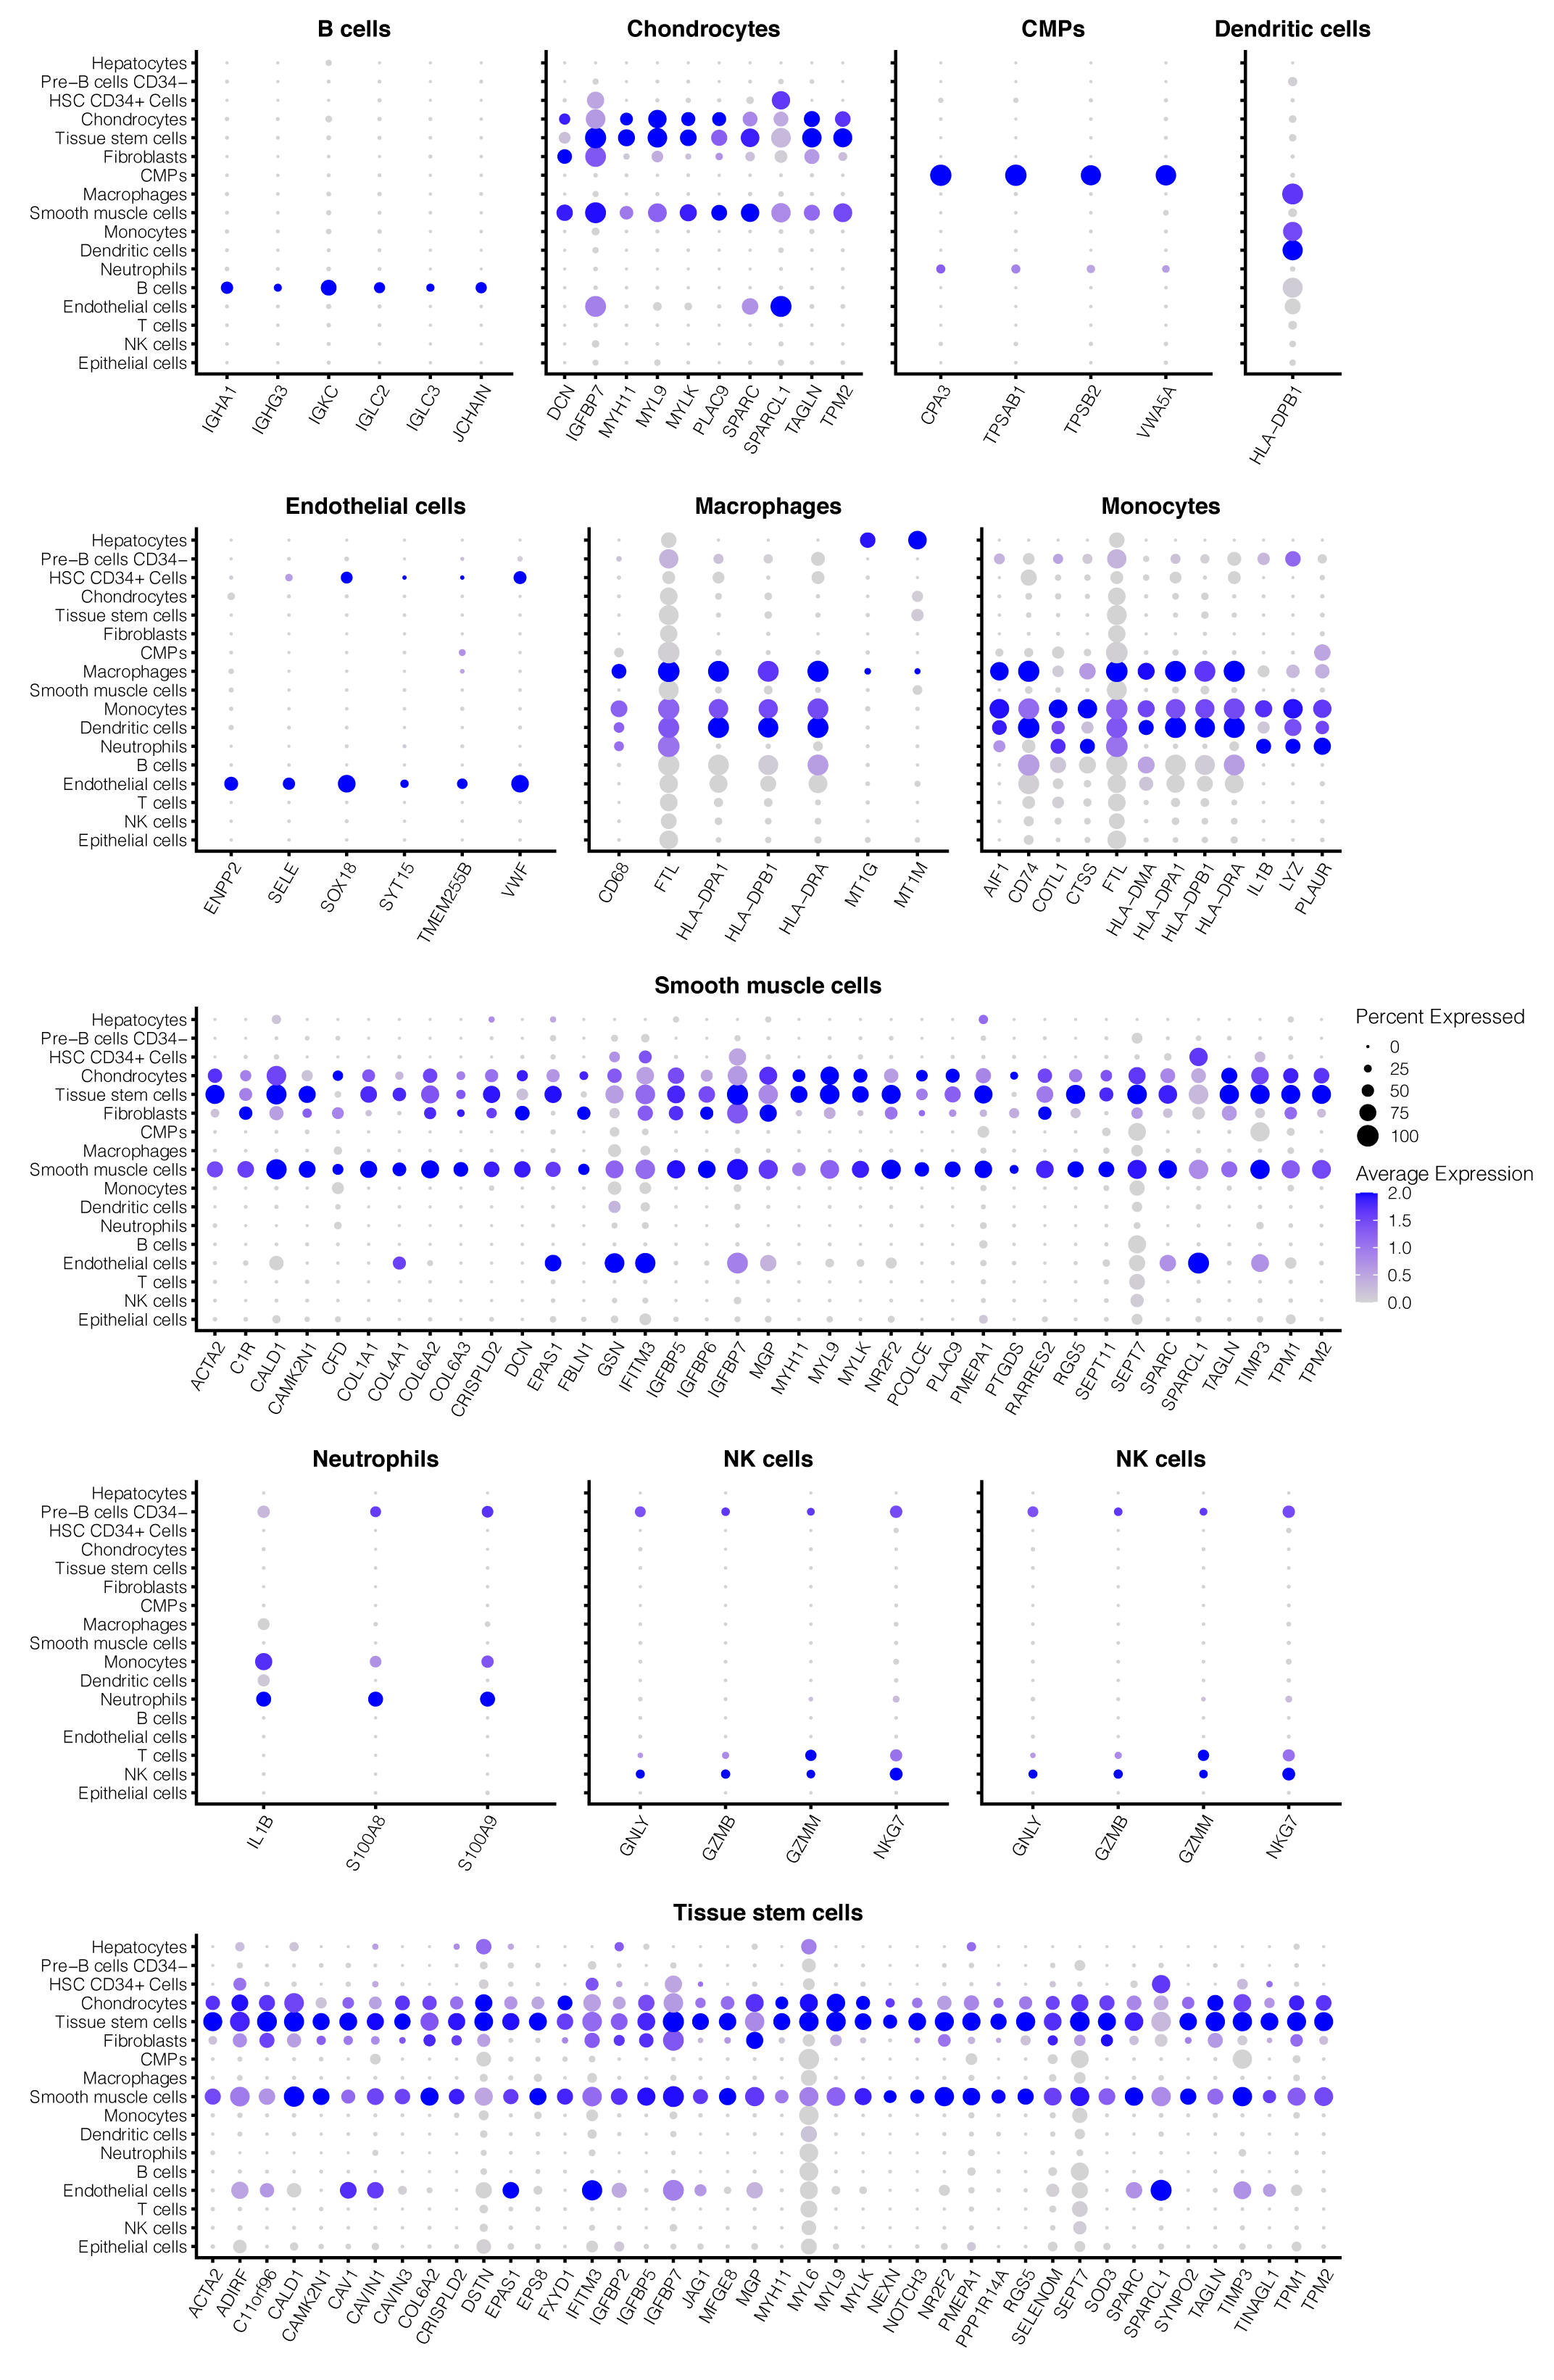
**

**Supplementary Figure S5.** Marker genes detected for diverse cell types in prostate cancer patients.

**
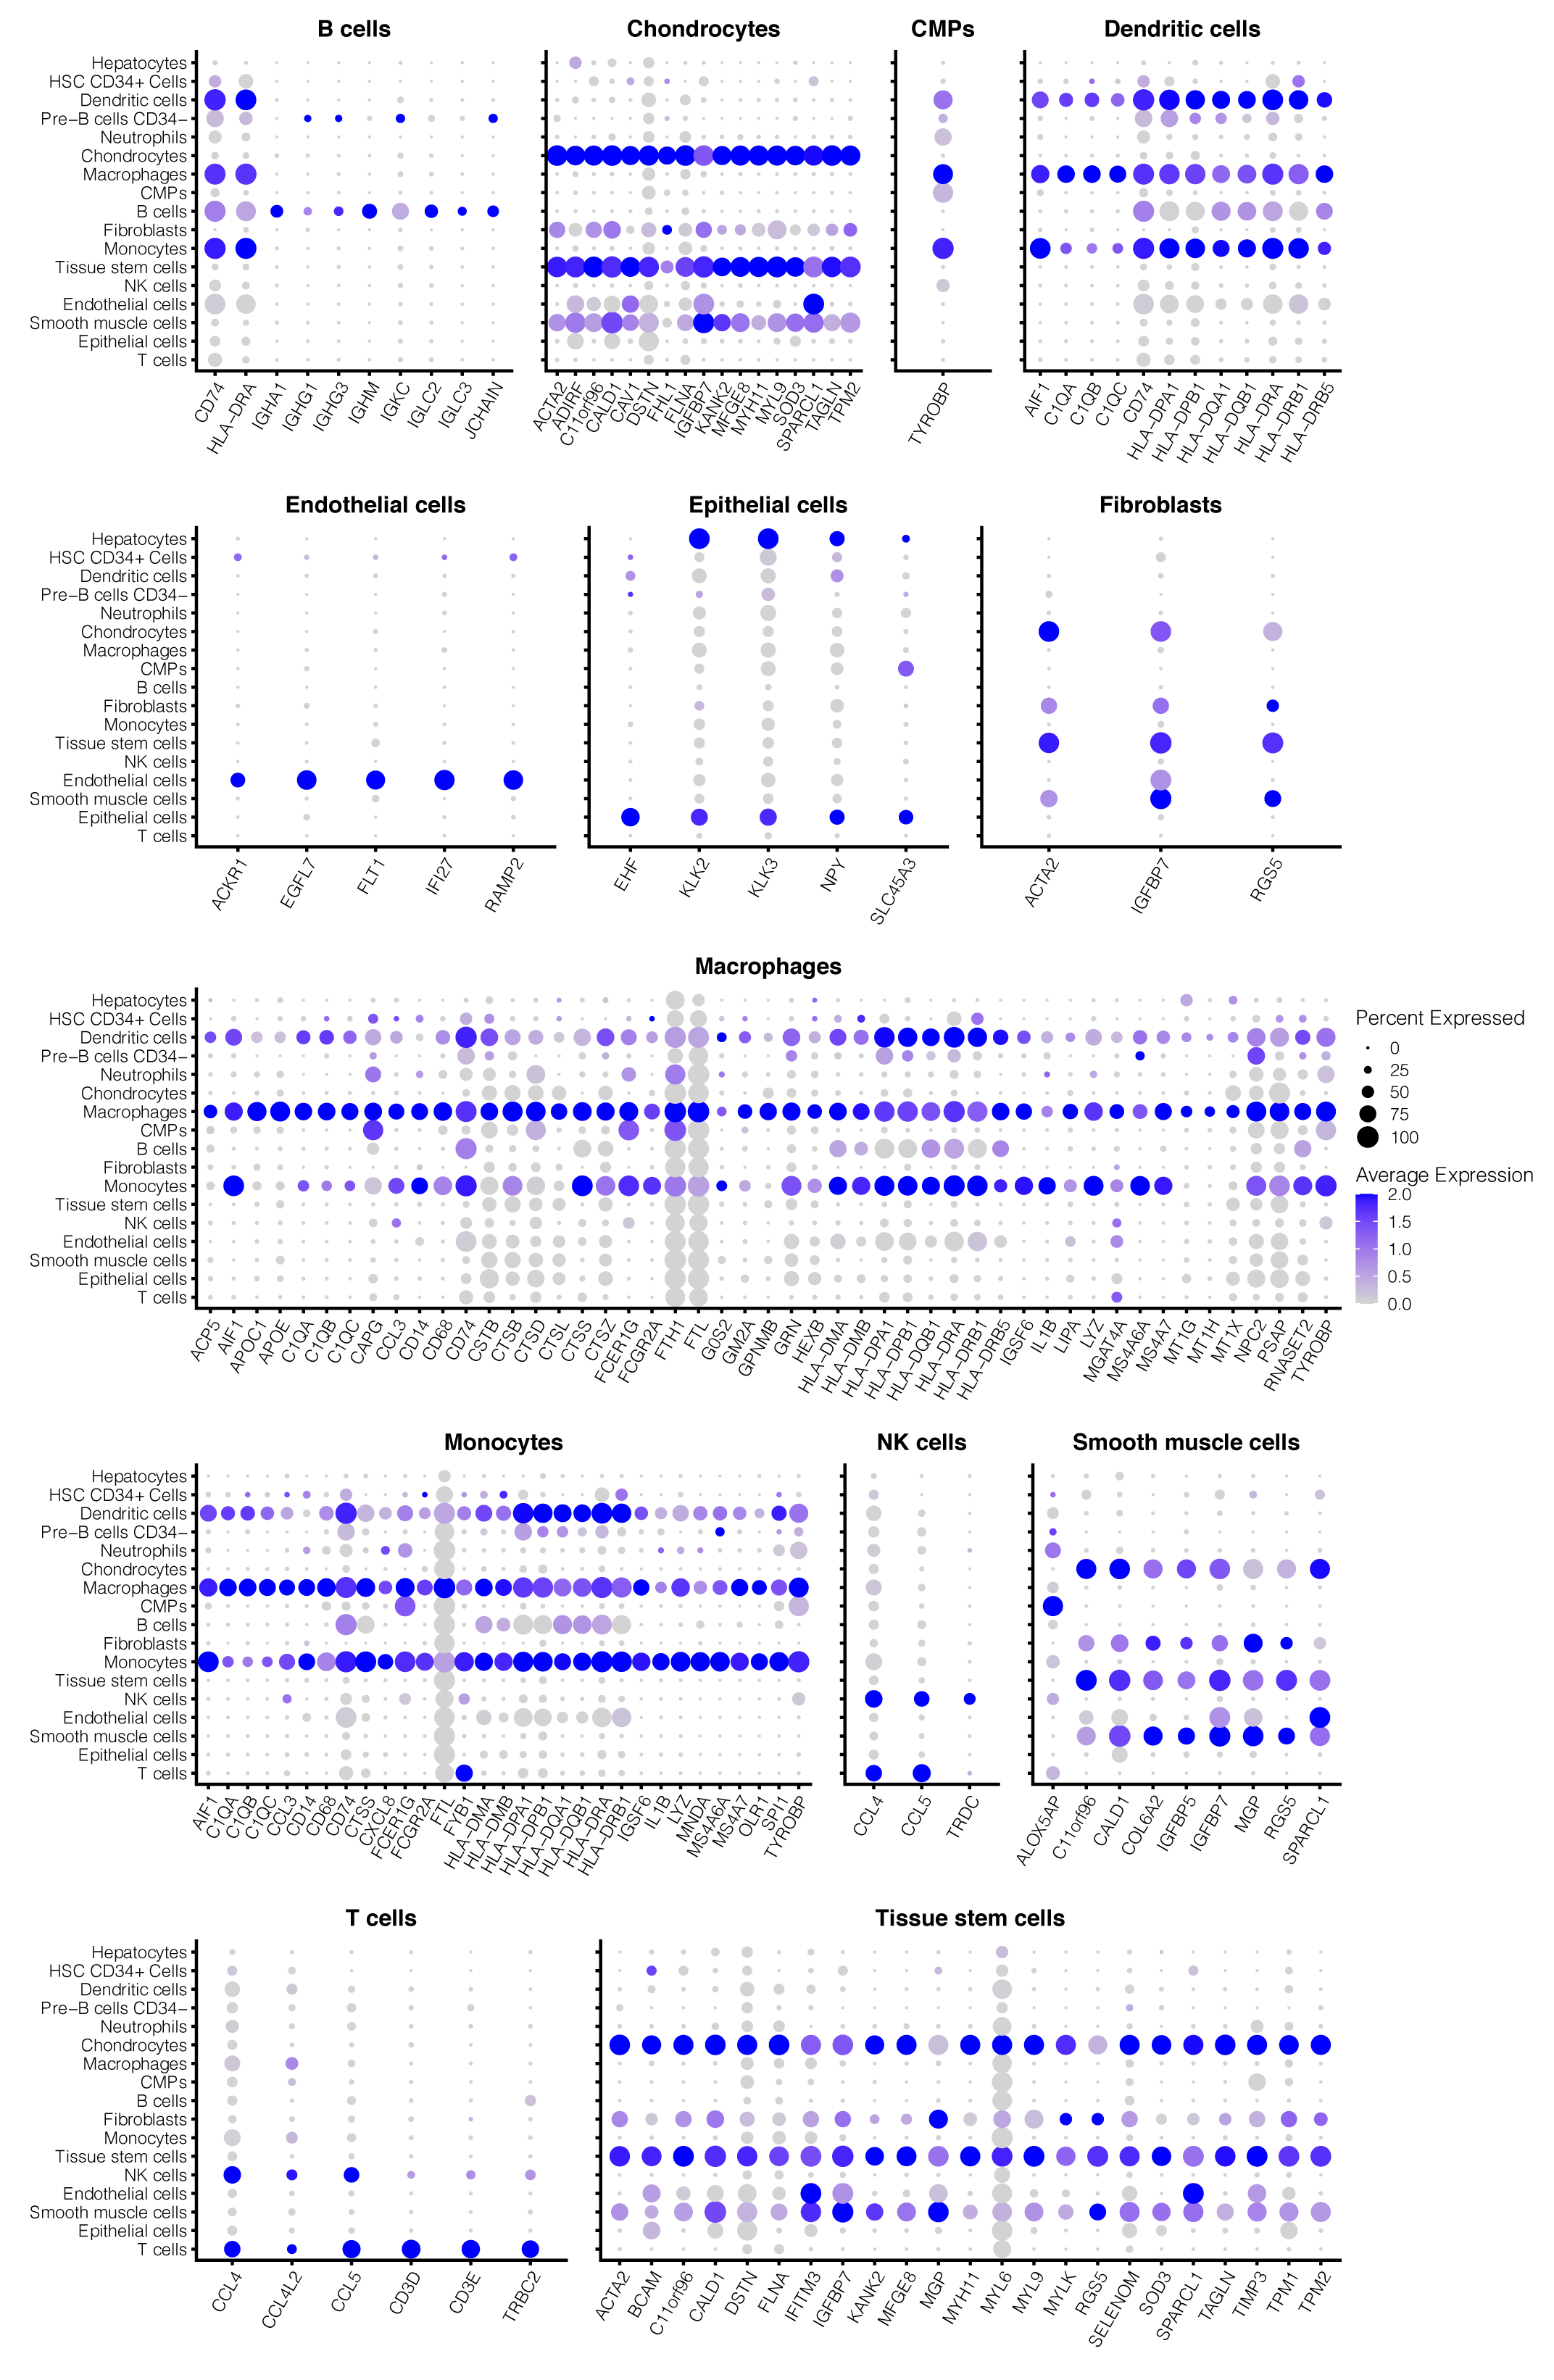
**

**Supplementary Figure S6.** Marker genes detected for diverse cell types in healthy controls.
