# Supplementary material for: Theoretical framework for the difference of two negative binomial distributions and its application in comparative analysis of sequencing data
Source: HighWire-hosted journal article supplement (doi:10.1101/gr.278843.123), 2024-10-01
Supplement: Supplemental_Table_S8.xlsx [file Supplemental_Table_S8.xlsx]

## Sheet: sheet1
Supplementary File S8: The lists of DEGs in 17 cell types between cancerous and healthy conditions.
Celltype	Number of DEGs	Name of DEGs
Fibroblasts	716	HES4;LRRC47;PHF13;SPSB1;AGTRAP;MTHFR;KAZN;MFAP2;SDHB;ECE1;ZBTB40;TCEA3;LDLRAP1;SNHG12;YTHDF2;PTPRU;SNRNP40;MARCKSL1;BSDC1;TRIM62;TRAPPC3;INPP5B;FHL3;HEYL;FOXJ3;KDM4A;BTBD19;TOE1;TMEM69;FOXD2;ROR1;CACHD1;GADD45A;AC118549.1;PRKACB;RPF1;LPAR3;ABCD3;AC105942.1;SLC25A24;AL356488.3;LRIF1;DRAM2;NOTCH2;LINC00623;RNF115;PDE4DIP;MTMR11;C1orf54;SELENBP1;MRPL9;ILF2;CREB3L4;UBAP2L;TSTD1;UFC1;DUSP12;RGS5;ILDR2…
Dendritic cells	615	PEX10;PRXL2B;TPRG1L;PEX14;FBLIM1;PADI2;OTUD3;CAMK2N1;ELOA-AS1;STPG1;DHDDS;PIGV;AL353622.1;AL050341.2;ZFP69B;SCMH1;TMEM125;C1orf210;KDM4A;IPO13;TESK2;IPP;TTC39A;RAB3B;PRKAA2;HOOK1;LPAR3;PALMD;CDC14A;AC093157.1;PRMT6;STRIP1;MAGI3;PHTF1;HMGCS2;PRKAB2;FMO5;BCL9;OTUD7B;RFX5;ZBTB7B;EFNA4;METTL25B;KLHDC9;TOMM40L;F5;SELL;C1orf53;FMOD;PFKFB2;YOD1;RPS6KC1;CENPF;TAF1A;DNAH14;URB2;COG2;COA6;ZNF496;PXDN;RSAD2…
Epithelial cells	266	AL627309.1;AL513320.1;SLC45A1;PLA2G5;C1QA;EPHB2;NKAIN1;BMP8B;CYB5RL;DAB1;FOXD3;SLC44A5;ST6GALNAC5;AK5;MCOLN2;AC239803.3;TDRKH-AS1;PAQR6;TSACC;AL139011.1;TNFSF4;LINC01031;AC119427.1;LGALS8-AS1;KIF26B;AL390860.1;AC144450.1;AC073195.1;CENPO;UCN;KCNG3;REEP1;CD8B2;AC018865.1;DARS1-AS1;AC007750.1;DLX1;HAGLR;AC098617.1;SLC4A3;LINC01238.1;AC026202.2;AC018809.2;AC097359.2;CDC25A;PRKAR2A-AS1;AC097358.2;FLN…
Macrophages	178	PRXL2B;PIGV;RCC1;OSCP1;POU3F1;ANKRD13C;DIPK1A;AL390036.1;CHI3L2;SLC22A15;ACP6;NUF2;UBE2T;CAMK1G;CENPF;SNAP47;AL445524.1;RSAD2;RNF144A;ALK;TMEM178A;LBX2-AS1;AC110769.2;DPP4;C2orf72;ARMC9;FANCD2;ZNF197;LARS2;CACNA1D;CHDH;DNASE1L3;TMEM45A;WDR5B;MCM7;ARID4A;ARHGEF26;SPTSSB;ECT2;TMEM44-AS1;APOD;TM4SF19;LIMCH1;SH3D19;AMACR;RAI14;GHR;CCNB1;CKMT2-AS1;KCNN2;LMNB1;PCDHB2;DPYSL3;HMMR;WWC1;AC008443.5;ADTRP;S…
Chondrocytes	99	SAMD11;WDTC1;AL360012.1;ARTN;BTBD8;GSTM5;AC245014.3;ECM1;S100A10;ETV3;PCP4L1;ATP1B1;G0S2;MTIF2;EFEMP1;MIR4435-2HG;FIGN;SCN3A;SCN7A;KCNE4;FBLN2;MRPS25;TRAK1;ABHD14A;TBC1D23;LSAMP;PDGFRA;SCRG1;C1QTNF3;CXCL10;CKMT2;VCAN;SNCAIP;TCF7;BLOC1S5;E2F3;EPHA7;MMS22L;CD24;AL450332.1;THBS2;CYTH3;THSD7A;NPY;SFRP4;PGAM2;PPP1R35;PTN;GPM6B;SRPX;PEBP4;KIF13B;TCIM;RIC1;FRRS1L;PTGDS;OR51E1;OR51E2;NAV2;MDK;MALAT1;BRMS…
Endothelial cells	99	RAP1GAP;COL9A2;RIMKLA;HOOK1;LPAR3;TLCD4;ZNF697;RAB25;CADM3;F5;FMOD;SLC45A3;C1orf116;DTL;TLR5;H2AC25;LINC01132;TMEFF2;MLPH;LTF;CADPS;HGD;CPNE4;SPON2;RBM47;BEND4;SHROOM3;PTPN13;ARHGEF38;CLGN;AADAT;CCDC110;DNAH5;AMACR;PART1;PDE8B;SEMA6A-AS1;SPDEF;SLC2A12;NPY;LINC00997;STEAP1;STEAP2;CNTNAP2;WDR86;CFP;ESRP1;FBXO10;WNK2;EPB41L4B;LRRC26;OR51E1;SPON1;EHF;FOLH1;P2RY6;COLCA1;TMEM45B;ST14;ZWINT;ADRB1;SHTN1;…
Smooth muscle cells	49	RBP7;PLA2G5;MCOLN3;COL24A1;AC245014.3;FCMR;SCHIP1;ADRA2C;CFI;NDST4;PRSS12;COL23A1;H2BC5;SLC44A4;EPHA7;CD24;TXLNB;ICA1;NPY;TRGC1;SEMA3E;GPR22;NUDT10;CHRDL1;FABP4;HAS2;PCA3;SVEP1;AC087521.1;MALAT1;PDGFD;SFRP5;TMTC2;AL136295.5;CRYM;PARD6A;ASPA;RNF112;CCL3L1;PPP1R1B;B3GNTL1;JPH2;CFD;PLK5;ACP5;ADGRE2;AC011503.1;KLK1;CECR2
Tissue stem cells	46	PADI2;PLA2G2A;BMP8B;URB2;TMEFF2;PCGEM1;AC012467.2;HGD;BCHE;TPRG1;FASTKD3;DAB2;FGF10;GALNT10;COL9A1;ARFGEF3;TMEM184A;ICA1;TSPAN13;IGFBP3;CLDN3;CNTNAP2;CHRDL1;FABP4;LRRC26;OR51E2;MALAT1;PSD;DHX37;DCLK1;EHD4;MESP1;LINC00924;EME2;SMIM22;TMC5;COX6A2;MT1H;FOXC2-AS1;PLAGL2;HIF3A;PRKD2;KLK11;UPB1;NEFH;CXADR
Pre-B cells CD34-	44	PLA2G2A;C1QB;TXNIP;S100A8;IGKC;STARD7;IL1B;COBLL1;DNAJC10;ITM2C;APPL1;ACP3;FYTTD1;SEL1L3;DAPP1;DAB2;MZB1;HLA-DRB5;CD2AP;MAN1A1;CARD11;RBM28;PAG1;LRRC26;MTRNR2L8;CYB561A3;RPS6KA4;UNC93B1;FCHSD2;MSMB;JMJD1C;CD69;LTA4H;GAS6;SMPD3;IST1;IRF8;SERPINF1;CCL4;CCL4L2;GADD45B;CDKN2D;NKG7;CYTH4
NK cells	42	DHCR24;DYNLT5;TMEM79;LINC00467;CHML;LTBP1;FN1;CAPN10-DT;LSAMP;HGD;PIK3R4;TLR1;CLGN;SH3RF1;AC144652.1;PPP2R3B;KLHL15;AC069185.1;ENPP2;PCA3;HBB;DKK3;MALAT1;SMCO4;HACD1;DEPP1;UNC5B;INPP5F;AC024257.3;COG6;AL161421.1;LINC01297;FAM30A;DLL4;HAPLN3;SULT1A1;FXR2;ADCYAP1;PTPRM;ZNF564;TTTY14;NEFH
Neutrophils	30	TNFRSF1B;FUBP1;PNO1;CAPN7;TMF1;MBD4;PIK3CA;PPP1R2;RNF145;SLC7A8;ZYX;IGBP1;RAD21;FNBP1;RELA;PKN1;NOLC1;BORCS7;TAMALIN;IL23A;CHD8;BATF;RPS6KA5;TRAPPC1;CCL3;GGNBP2;MAFB;GNA15;USF2;UFD1
B cells	29	RGS5;MIXL1;ADCY8;DNAJC27-AS1;SFXN5;IGKV3-20;ITGA6-AS1;GTF2E1;LINC02362;AL096865.1;AC009403.1;AC069185.1;CLIC3;ZNHIT2;MALAT1;C1R;IGF1;MYL2;IGHV3-7;IGHV3-23;IGHV4-31;IGHV4-34;IGHV3-74;MYH11;QPRT;MT1G;B9D1;KXD1-AS1;IGLV3-21
Monocytes	23	RAB42P1;LTBP1;SGO1;APOD;CCNA2;CSF2;H2AC17;BGN;CCN3;FOLH1;MALAT1;CSTB;KCNC2;RAB35-AS1;ADGRD1;CDKN3;WDHD1;AL512791.2;BMERB1;MT1A;CCL17;BIRC5;AL117379.1
CMPs	14	TINAGL1;CNTN1;CXCL8;AGR2;EEPD1;PCA3;GOLM1;MALAT1;C15orf48;MESP1;HBA1;MT1M;MT1H;CDC42EP5
T cells	13	OAZ3;TMEM169;MYLK-AS1;PRSS35;ARFGEF3;FAM83H;OR51E2;MALAT1;AL731577.1;AL049780.2;PRSS8;SNAI3-AS1;APOC1
HSC CD34+ Cells	10	USP33;REL;CAPG;CACNA1D;SELENOK;SKIL;HCG18;PPP1R10;PSMA7;NFKBID
Hepatocytes	0	none
