# Supplementary material for: Theoretical framework for the difference of two negative binomial distributions and its application in comparative analysis of sequencing data
Source: HighWire-hosted journal article supplement (doi:10.1101/gr.278843.123), 2024-10-01
Supplement: Supplemental_Table_S9.xlsx [file Supplemental_Table_S9.xlsx]

## Sheet: Sheet1
Supplementary Table S9: Information summary of prostate cancer marker genes detected by DEGage.
Gene	Full Gene Name	Role In Cancer	Prostate Cancer Specific?	Link
AKR1C3	Aldo-keto reductase 1C3	Androgen biosynthesis	Yes	https://www.ncbi.nlm.nih.gov/pmc/articles/PMC5216999/#:~:text=AKR1C3%20plays%20an%20important%20role,18%2C%2027%2C%2028%5D.
CACNA1D	Calcium Voltage-Gated Channel Subunit Alpha 1 D	Overexpression leads to increased androgen receptor activation	Yes	https://www.sciencedirect.com/science/article/pii/S1078143913002433?via%3Dihub
COA6	Cytochrome C Oxidase Assembly Factor 6	Overexpression meidates "angiogenic shift"	Yes	https://www.ncbi.nlm.nih.gov/pmc/articles/PMC5783182/
FXYD6	FXYD Domain Containing Ion Transport Regulator 6	Signals Src and ERK tumor promoting pathways	No	https://www.ncbi.nlm.nih.gov/pmc/articles/PMC4085285/
GRB10	Growth factor receptor bound protien 10	Reciprocal regulation with androgen receptor	Yes	https://pubmed.ncbi.nlm.nih.gov/33038264/
HOXB13	Homeobox B13	G84E mutation is associated with increased prostate cancer risk	Yes	https://www.ncbi.nlm.nih.gov/pmc/articles/PMC3779870/
KCNE4	Potassium Voltage-Gated Chennel Subfamily E Regulatory Subunit 4	Activates PI3K/ATK signaling pathway, promotes radioresistance	No	https://www.sciencedirect.com/science/article/pii/S0344033822004782
LURAP1L	Leucine rich adaptor protein like 1	Transforms fibroblasts into cancer associated fibroblasts	No	https://www.ncbi.nlm.nih.gov/pmc/articles/PMC8157341/
MT1H	Metallothionein 1H	Tumor supressor activity	Yes	https://www.ncbi.nlm.nih.gov/pmc/articles/PMC4080639/#:~:text=These%20experiments%20suggest%20that%20MT1h,of%20prostate%20and%20liver%20cancers.
MT1M	Methallothionein 1M	Promotes intraosseous tumor growth and osteolysis	Yes	https://www.ncbi.nlm.nih.gov/pmc/articles/PMC4080639/#:~:text=These%20experiments%20suggest%20that%20MT1h,of%20prostate%20and%20liver%20cancers.
NPY	Neuro Peptide Y	Facilitates perineural invasion	Yes	https://link.springer.com/article/10.1007/s00432-022-04540-x
OLFM2	Olfactomedin 2	Unclear, although OLMF4 expression has been found to supress prostate cancer growth	No	https://www.ncbi.nlm.nih.gov/pmc/articles/PMC3128558/
PARVA	Parvin Alpha	PARVA promotes metastasis through ILK signaling	No	https://journals.plos.org/plosone/article?id=10.1371/journal.pone.0118530
PDE3A	Phosphodiesterase 3A	Activates NF-kB signaling, targeted in thereputic development	No	https://aacrjournals.org/mct/article/19/3/868/274244/Phosphodiesterase-3A-Represents-a-Therapeutic
SPON2	Spondin-2	Serum biomarker for prostate cancer	Yes	https://www.ncbi.nlm.nih.gov/pmc/articles/PMC3352876/
TCIM	Transcriptional And Immune Response Regulator	Negatively regulates self-renewal of cancerous cells via NOTCH2 suppression	No	https://www.nature.com/articles/ncomms8122#:~:text=and%20liver%20CSCs.-,C8orf4%20negatively%20regulates%20the%20self%2Drenewal%20of%20liver,via%20suppression%20of%20NOTCH2%20signalling.
TESC	Tescalclin	Contributes to tumor cell survival	No	https://www.ncbi.nlm.nih.gov/pmc/articles/PMC7427307/
THSD7A	Thrombospondin Type1 Domain Containing 7A	Affects FAK-dependent signaling pathways	Yes	https://www.ncbi.nlm.nih.gov/pmc/articles/PMC9857569/
WDR13	WD Repeat Domain 13	Unclear, but WDR3 Promotes stem cell like qualities	Yes	https://pubmed.ncbi.nlm.nih.gov/36905106/
