# Supplementary material for: Theoretical framework for the difference of two negative binomial distributions and its application in comparative analysis of sequencing data
Source: HighWire-hosted journal article supplement (doi:10.1101/gr.278843.123), 2024-10-01
Supplement: Supplemental_Table_S10.xlsx [file Supplemental_Table_S10.xlsx]

## Sheet: sheet1
Supplementary File S10: The lists of DEGs for comparing 17 cell types each other under cancerous and healthy conditions, respectively.
Tumor Positive Cells
	B_cell	Chondrocytes	CMP	DC	Endothelial_cells	Epithelial_cells	Fibroblasts	Hepatocytes	HSC_CD34+	Macrophage	Monocyte	Neutrophils	NK_cell	Pre-B_cell_CD34-	Smooth_muscle_cells	T_cells	Tissue_stem_cells
B_cell	0	HES4;VWA1;ICMT;KLHL21;VAMP3;KIF1B;DHRS3;FBLIM1;EPHA2;ARHGEF10L;HSPG2;TCEA3;ID3;CD52;TMEM200B;LAPTM5;TINAGL1;TMEM54;EVA1B;AL050341.2;KCNQ4;CYP4X1;FOXD2;ZFYVE9;DOCK7;CACHD1;AK4;NEXN;TTLL7;DDAH1;CYR61;LRRC8C;TGFBR3;ARHGAP29;SNX7;CELSR2;GSTM3;C1orf162;MAGI3;PIAS3;BOLA1;OTUD7B;SEMA6C;S100A10;S100A6;S100A4;S100A13;SLC27A3;RAB13;IL6R;RUSC1;SYT11;LMNA;KIRREL1;ATP1A2;CD48;ADAMTS4;RGS5;PBX1;MGST3;F5;PRRX1;…	ACOT7;FBXO44;CLCN6;HSPG2;AHDC1;RCC1;LCK;KIAA1522;HIVEP3;ARMH1;TCEANC2;ACOT11;NEXN;GBP1;CNN3;ALG14;TMEM56;SLC16A1-AS1;HIST2H2BF;S100A6;SLC27A3;IL6R;LMNA;MNDA;SLAMF6;SLAMF1;FCER1G;HSPA6;FCGR2B;PBX1;SELL;GLUL;PTGS2;AL390957.1;RGS13;NUAK2;RHEX;CR1;AL591895.1;AL391832.2;KMO;NLRP3;RNASEH1-AS1;ID2;GEN1;LAPTM4A;GDF7;AC104695.3;HAAO;HK2;IGKC;AFF3;IL18R1;EPB41L5;CXCR4;ITGA6;PDK1;TTN;SESTD1;CAVIN2;AC020571.…	VWA1;VAMP3;ENO1;GPR157;MIR34AHG;KIF1B;PGD;AGTRAP;DHRS3;PLA2G2A;C1QA;C1QC;C1QB;TCEA3;SELENON;PTAFR;SERINC2;LCK;EVA1B;AL050341.2;RIMKLA;YBX1;RAB3B;LRRC42;DNASE2B;SPATA1;FNBP1L;ARHGAP29;F3;SNX7;C1orf54;AL391069.3;S100A10;S100A11;SLC27A3;IL6R;EFNA1;RUSC1;SYT11;FCER1G;HSPA6;F5;NPL;RGL1;PTGS2;NAV1;ELF3;KLHL12;LAX1;SOX13;AC092803.2;ATF3;RPS6KC1;FAM177B;EPHX1;RHOU;TARBP1;ID2;ASAP2;GRHL1;FKBP1B;AC074117.1…	VWA1;PLCH2;ICMT;VAMP3;PIK3CD;PIK3CD-AS2;RBP7;KIF1B;EPHA2;HSPG2;ASAP3;ID3;SELENON;THEMIS2;TINAGL1;FAM167B;PHC2;EVA1B;CITED4;SHISAL2A;PLPP3;NFIA;LEPROT;LEPR;ADGRL4;MCOLN2;CYR61;LRRC8C;TGFBR3;ARHGAP29;VCAM1;SRGAP2B;ITGA10;C1orf54;SEMA6C;S100A10;S100A6;S100A13;SLC27A3;RAB13;ADAM15;LMNA;NES;ARHGEF11;MNDA;AIM2;ACKR1;DUSP23;SLAMF6;CD84;SLAMF1;ARHGAP30;ADAMTS4;TOMM40L;FCGR2B;FCRLA;FAM78B;SELP;SELE;RASAL2…	AL627309.1;HES4;TNFRSF4;SDF4;AURKAIP1;MRPL20;VWA1;FNDC10;GNB1;RER1;PEX10;RPL22;PARK7;SLC45A1;RERE;ENO1;MIR34AHG;TMEM201;CLSTN1;CENPS;CASZ1;AGTRAP;DHRS3;KAZN;TMEM51;CPLANE2;ATP13A2;ARHGEF10L;MINOS1;NBL1;PLA2G2A;NBPF3;WNT4;ZNF436;TCEA3;ASAP3;MDS2;RPL11;FUCA1;CNR2;NIPAL3;RCAN3;TMEM50A;SELENON;AL020996.1;CD52;HMGN2;PIGV;SFN;KDF1;THEMIS2;ATP5IF1;PTPRU;LAPTM5;SERINC2;COL16A1;IQCC;EIF3I;MARCKSL1;KIAA152…	AGRN;VWA1;MEGF6;AL034417.4;TMEM201;FBLIM1;ARHGEF10L;HSPG2;ZNF436;TMEM200B;COL16A1;KIAA1522;PHC2;EVA1B;OSCP1;FHL3;RIMKLA;FOXD2;ACOT11;PRKAA2;DOCK7;CACHD1;AK4;SGIP1;DDAH1;AC092807.3;CYR61;LRRC8C-DT;TGFBR3;ARHGAP29;ABCD3;SNX7;GSTM3;TENT5C;NUDT4B;MTMR11;C1orf54;SELENBP1;SLC27A3;KIRREL1;ACKR1;ATP1A2;CD48;ADAMTS4;RGS5;PBX1;GPR161;AL021068.1;PRRX1;LAMC1;RGL1;PTGS2;PTPRC;PHLDA3;LMOD1;PPP1R12B;FMOD;SOX13;…	VWA1;RERE;PRDM2;TCEA3;PNRC2;CD52;WASF2;DNAJC8;KHDRBS1;RBBP4;SMAP2;NASP;TUT4;JUN;JAK1;AK4;FUBP1;DDAH1;ZNF644;CAPZA1;BCAS2;TENT5C;MCL1;CTSS;S100A4;TPM3;ADAR;KRTCAP2;CCT3;PRRC2C;IVNS1ABP;RGS1;RGS2;PTPRC;BTG2;MDM4;CD55;IRF2BP2;ARID4B;GNG4;YPEL5;LBH;SRSF7;ZFP36L2;XPO1;NAGK;TMSB10;IGKC;EIF5B;AFF3;MAP4K4;GCC2;ACTR3;MAP3K2;ARHGAP15;TANK;HNRNPA3;NFE2L2;ORMDL1;HSPD1;NOP58;PIKFYVE;ARPC2;SP100;ITM2C;GPC1;EDE…	VWA1;PRDM2;RSRP1;CD52;HMGN2;LAPTM5;SMAP2;UQCRH;ACOT11;PRKAA2;ADGRL4;ARHGAP29;F3;AC239868.2;S100A4;ACKR1;SELP;SELE;PRRC2C;RALGPS2;LINC01686;PTGS2;PTPRC;SOX13;NUCKS1;CD55;ASAP2;RN7SL832P;PDIA6;OST4;AC104695.3;RPS27A;CNRIP1;ACTR3;MZT2B;POTEE;TMEFF2;SF3B1;EEF1B2;MLPH;IL5RA;CMTM8;MST1;HYAL2;SPCS1;DNASE1L3;PARP14;GATA2;CPA3;SERP1;SEC62;NAALADL2;RPL35A;SMIM14;LINC01094;BBS7;IL2;SPRY1;MAML3;SMAD1;SLC12A7…	AGRN;PLCH2;ICMT;VAMP3;ENO1;KIF1B;PGD;FBXO2;AGTRAP;PLOD1;DHRS3;ARHGEF10L;PLA2G2A;C1QA;C1QC;C1QB;CNR2;SH3BGRL3;FGR;LAPTM5;SERINC2;PHC2;EVA1B;PPT1;YBX1;ATP6V0B;PRDX1;SAMD13;F3;SNX7;AL390036.1;AL365361.1;DCLRE1B;C1orf54;CTSS;TNFAIP8L2;S100A10;S100A11;S100A9;S100A6;SLC27A3;RAB13;IL6R;GBA;SLC25A44;ARHGEF11;CD84;FCER1G;FCGR2A;FCGR3A;CREG1;SOAT1;GLUL;NPL;NCF2;ARPC5;C1orf21;PTGS2;CHIT1;SOX13;G0S2;ATF3;BAT…	FNDC10;VAMP3;PIK3CD-AS2;PGD;PLOD1;FHAD1;EFHD2;ARHGEF10L;C1QA;C1QC;C1QB;SH3BGRL3;FGR;PHC2;LINC01137;PPT1;LPAR3;LRRC8C;SNX7;AL390036.1;FAM102B;AMPD2;SRGAP2B;NBPF19;C1orf54;CTSS;TNFAIP8L2;AL391069.2;S100A10;S100A11;S100A9;S100A8;S100A6;S100A4;SLC27A3;IL6R;KCNN3;ARHGEF11;FCRL1;MNDA;FCER1A;SLAMF1;FCER1G;FCGR2A;FCGR3A;GLUL;NCF2;ARPC5;PTGS2;PLA2G4A;ATF3;MARC1;HIST3H2BB;DISC1;AL391832.2;NLRP3;SH3BP5L;ID2…	ACOT7;CEP85;KDF1;KIAA1522;AC114490.2;AC004865.2;AL512353.1;MMACHC;ACOT11;SNX7;AC118553.2;AL390036.1;TENT5C;TXNIP;S100A9;S100A8;SLC27A3;IL6R;LMNA;FCER1G;PBX1;GLUL;PTGS2;SOX13;NFASC;MIR29B2CHG;AL356275.1;RHOU;ZNF670;AC104695.3;YPEL5;SLC8A1;HAAO;ZFP36L2;STON1;BCL11A;AC017083.1;CNRIP1;ANTXR1;HK2;IL18R1;FHL2;IL1A;IL1B;ZEB2-AS1;CYTIP;COBLL1;TTC30A;FAM171B;HSPD1;HSPE1;PLCL1;NRP2;TUBA4A;SPEG;SCG2;GPR35;I…	MMP23B;COA7;LINC01781;TGFBR3;SLC27A3;SH2D2A;FCRL2;MNDA;AIM2;FCRL6;FCER1G;FCGR2B;XCL1;FASLG;NCF2;PTGS2;SOX13;CR1;NLRP3;LINC01871;GEN1;AC104695.3;CNRIP1;GNLY;CD8A;IGKC;ZAP70;IL18RAP;MLPH;SNED1;LINC02084;ZNF860;ZNF197;CCR5;LTF;MITF;LINC01215;GATA2;CPA3;TLR6;JCHAIN;ALPK1;IL2;SPRY1;AC096733.2;GPM6A;OTULINL;GZMK;ADAM19;EBF1;LCP2;DOK3;BTNL9;SERPINB9P1;LY86;GABBR1;AL662796.1;HLA-DOB;HLA-DOA;FGD2;CRISP3;K…	PADI4;PLA2G2A;KIAA1522;AL139260.1;PRDX1;KCNA2;BCAS2;CSDE1;TXNIP;CD48;FCER1G;IER5;CD55;RHOU;DISC1;GNG4;LINC01814;RHOB;HK2;GNLY;IL1B;NCKAP5;NR4A2;CYTIP;SF3B1;LANCL1;MLPH;LINC02019;PHF7;DNASE1L3;ZBTB20;CNBP;TMEM44-AS1;RHOH;AREG;MMRN1;BANK1;FAM160A1;TRIM61;DAB2;MRPS30-DT;SNX2;ALDH7A1;IRF1;SEPT8;PRPF4B;CD83;RIPOR2;HLA-DRB5;RUNX2;TNFRSF21;PNISR;AMD1;MARCKS;PKIB;AKAP12;ARID1B;STK17A;CD36;FAM133B;PILRA;K…	AGRN;MMP23B;ICMT;KLHL21;VAMP3;FBLIM1;EPHA2;ARHGEF10L;CAMK2N1;ZNF436;RPS6KA1;SYTL1;THEMIS2;TMEM200B;COL16A1;PHC2;ZC3H12A;AL050341.2;CYP4X1;FOXD2;SPATA6;LRRC42;PRKAA2;CACHD1;TTLL7;DDAH1;AC092807.3;CYR61;TGFBR3;ARHGAP29;SNX7;CSF1;C1orf162;MAGI3;TENT5C;AC245595.1;BOLA1;MTMR11;OTUD7B;CTSS;SEMA6C;SELENBP1;S100A6;S100A13;SLC27A3;SYT11;KIRREL1;ATP1A2;CD48;SLAMF7;ADAMTS4;RGS5;PBX1;PRRX1;LAMC1;RGL1;C1orf21…	PIK3CD-AS2;AL031728.1;LDLRAD2;CNR2;MAN1C1;ZNF683;FGR;SMPDL3B;BEST4;BEND5;COA7;AC119428.2;EVI5;BCAR3;KCNN3;FCRL2;CD1D;CD1C;MNDA;FCGR2A;FCGR2B;AL359541.1;FASLG;C1orf220;NCF2;NUAK2;CR1;MARC2;LINC01871;FAM49A;AC104695.3;AC018682.1;EML6;AC012368.1;LGALSL;LINC02245;AC073263.2;SH2D6;CD8A;IGKC;ZAP70;AFF3;IL18RAP;AC016745.2;KYNU;LYPD6B;AC019197.1;AC078883.3;CD28;COL4A3;B3GNT7;NMUR1;OXNAD1;SGO1;THRB;OSBPL1…	HES4;AGRN;TNFRSF14-AS1;VAMP3;KIF1B;C1orf167;DHRS3;FBLIM1;EPHA2;CAMK2N1;CD52;THEMIS2;TMEM200B;TINAGL1;COL16A1;EVA1B;AL050341.2;ARMH1;CYP4X1;FOXD2;SHISAL2A;ACOT11;PRKAA2;CACHD1;AK4;TTLL7;AC092807.3;CYR61;CCDC18;ARHGAP29;ABCD3;VAV3;GSTM3;DENND2D;C1orf162;MAGI3;MTMR11;OTUD7B;C1orf54;SEMA6C;S100A6;S100A4;S100A13;SLC27A3;RAB13;SYT11;LMNA;MNDA;ATP1A2;CD84;CD48;ARHGAP30;ADAMTS4;RGS5;PBX1;MGST3;CCDC181;SE…
Chondrocytes	0	0	VWA1;KLHL21;FBXO44;FBLIM1;TCEA3;RPL11;STMN1;SH3BGRL3;CD52;TRNP1;MAP3K6;AHDC1;LAPTM5;COL16A1;TMEM54;EVA1B;AL050341.2;PTPRF;MAST2;MOB3C;FOXD2;ZFYVE9;PATJ;SGIP1;GNG12;TTLL7;GBP2;TGFBR3;TMEM56;SNX7;SORT1;AL355488.1;C1orf162;NGF;SRGAP2C;SRGAP2B;GPR89A;ITGA10;ANKRD34A;PDE4DIP;MINDY1;PRUNE1;GABPB2;SELENBP1;S100A10;S100A13;EFNA1;SEMA4A;PIGM;CD84;HSPA6;DDR2;METTL18;GLUL;FAM129A;PTGS2;RGS1;PTPRC;CAMSAP2;PH…	GPR157;PGD;EFHD2;ZBTB17;EPHA2;PADI2;ARHGEF10L;PLA2G2A;HSPG2;C1QA;C1QC;C1QB;SH3BGRL3;CD52;LAPTM5;PTP4A2;MARCKSL1;RNF19B;ATP6V0B;TSPAN1;FAAH;RAB3B;DHCR24;PLPP3;TACSTD2;NEXN;ADGRL2;LPAR3;GBP4;TGFBR3;FNBP1L;KIAA1324;C1orf162;TSPAN2;ANKRD35;S100A10;S100A11;S100A6;CREB3L4;TPM3;CD84;CD48;F11R;HSPA6;FCGR3A;OLFML2B;DDR2;RGS5;MPC2;ATP1B1;RGS1;DENND1B;PTPRC;NAV1;CDK18;RASSF5;G0S2;AC092803.2;MARK1;DUSP10;C1o…	VWA1;LINC00982;AC254633.1;TMEM51;ARHGEF10L;PLA2G2A;HSPG2;RUNX3;TENT5B;COL16A1;RIMS3;PIK3R3;CYP4X1;PRKAA2;ROR1;DNAJC6;LEPR;NEXN;GIPC2;IFI44;SYDE2;GBP3;GBP4;TGFBR3;KCNC4;OLFML3;ANKRD35;TXNIP;NBPF14;CTSK;S100A10;S100A3;S100A16;TPM3;ADAM15;IFI16;DUSP23;F11R;FCGR2A;OLFML2B;RGS5;ANGPTL1;ABL2;NAV1;PPP1R12B;PIK3C2B;CDK18;RAB7B;FCMR;PTPN14;C1orf115;RHOU;AGT;C1orf131;GREM2;C1orf229;GDF7;ADCY3;CLIP4;LINC019…	SDF4;MXRA8;VWA1;PEX10;FAM213B;SMIM1;RPL22;PARK7;RERE;AL357552.2;PGD;AGTRAP;FHAD1;TMCO4;PLA2G2A;RAP1GAP;RPL11;NIPAL3;RCAN3;SRRM1;RSRP1;MACO1;LDLRAP1;PIGV;ATP5IF1;TMEM200B;FABP3;PTP4A2;MARCKSL1;KIAA0319L;MEAF6;COL9A2;KCNQ4;PTPRF;ATP6V0B;SLC6A9;AL139220.2;RPS8;PIK3R3;TSPAN1;UQCRH;FAAH;PDZK1IP1;FOXD2-AS1;FOXD2;TRABD2B;TTC39A;RAB3B;ECHDC2;SCP2;PODN;TMEM59;DHCR24;TACSTD2;ST6GALNAC3;NEXN;GIPC2;PRKACB;LP…	TARDBP;CLIC4;SMIM12;MRPS15;SORT1;HIPK1;PBXIP1;RGS5;GLUL;CAPN2;LTBP1;USP34;LGALSL;IMMT;ITGAV;HDLBP;IMPDH2;APPL1;SLMAP;PCNP;RNF13;DNAJC19;APOD;NDNF;HMGB2;SLC25A4;PDLIM3;SSBP2;NDFIP1;PPARD;FKBP5;ADGRF5;NT5DC1;PLN;HDDC2;ENPP1;PDGFA;IL6;GPNMB;PLP2;FLNA;LZTS1;CLU;TCIM;PLAT;RDH10;PAG1;ANGPT1;NOV;FBXO32;PUF60;PGM5;FAM122A;NTRK2;NR4A3;TMEM38B;HSDL2;C9orf78;SURF1;PNPLA2;CD151;CAVIN3;CD44;MDK;LRRC10B;ARL2;M…	CCNL2;CAMTA1;VAMP3;RERE;SPEN;PLA2G2A;CAMK2N1;HP1BP3;EIF4G3;HNRNPR;ID3;PNRC2;NUDC;WASF2;DNAJC8;PUM1;KHDRBS1;RBBP4;AK2;GJA4;LSM10;SMAP2;HYI;NASP;GPBP1L1;RNF11;OSBPL9;NRDC;TUT4;ZYG11B;C1orf123;MAGOH;JUN;NFIA;JAK1;SERBP1;GNG12;WLS;TYW3;ACADM;USP33;FUBP1;PKN2;ZNF644;DNTTIP2;ARHGAP29;GSTM3;AHCYL1;CAPZA1;CSDE1;MAN1A2;MCL1;PSMB4;MRPL9;S100A10;S100A6;S100A4;RAB13;ADAR;DPM3;KRTCAP2;DAP3;LMNA;CCT3;PBX1;MGST…	MRPL20;CAMTA1;MINOS1;CDC42;ID3;HMGN2;NUDC;DNAJC8;EIF3I;NDUFS5;CAP1;YBX1;UQCRH;NFIA;SH3GLB1;LMO4;PKN2;RPL5;CNN3;MRPS21;S100A11;S100A6;S100A4;PBXIP1;MGST3;PRRC2C;PRDX6;FAM129A;CSRP1;NUCKS1;COX20;YWHAQ;ROCK2;LAPTM4A;OST4;FOSL2;PPP1CB;LBH;EPAS1;CALM2;RTN4;RPS27A;CCT4;CCT7;CAPG;MAT2A;ACTR3;DBI;MZT2B;ZEB2;ATP5MC3;NCKAP1;MYO1B;SF3B1;EEF1B2;IGFBP5;PTMA;LRRFIP1;GOLGA4;EIF1B;CTNNB1;MAP4;TMA7;SPCS1;NDUFB4;Z…	FAM213B;PRDM16;KCNAB2;ENO1;PGD;FBLIM1;EPHA2;PADI2;C1QA;C1QC;C1QB;PAQR7;SH3BGRL3;CD52;TMEM200B;LAPTM5;TINAGL1;RNF19B;HEYL;KCNQ4;ARTN;ATP6V0B;PRDX1;FOXD2;ZFYVE9;DNAJC6;NEXN;ADGRL2;CYR61;TGFBR3;C1orf162;SEMA6C;S100A10;S100A11;S100A3;TPM3;GBA;SEMA4A;PEAR1;CD84;CD48;F11R;FCGR2A;FCGR3A;RGS5;CREG1;ATP1B1;SLC19A2;PRRX1;ABL2;GLUL;NPL;NMNAT2;NCF2;PTGS2;RGS1;PTPRC;NAV1;LMOD1;PPP1R12B;G0S2;SERTAD4-AS1;SLC30A…	MXRA8;KCNAB2;PIK3CD;PGD;EFHD2;FBLIM1;MFAP2;PLA2G2A;WNT4;C1QA;C1QC;C1QB;RPL11;SH3BGRL3;CD52;TRNP1;LAPTM5;PTP4A2;RNF19B;ZC3H12A;DNALI1;ARTN;CCDC24;CYP4X1;FOXD2;ZFYVE9;ROR1;SGIP1;AK5;NEXN;COL24A1;GBP3;GBP4;TGFBR3;AC105942.1;FAM102B;C1orf162;TSPAN2;NGF;ANKRD35;GJA5;PLEKHO1;MCL1;SELENBP1;S100A10;S100A11;TPM3;MUC1;SEMA4A;PEAR1;KIRREL1;CD84;CD48;FCGR2A;FCGR3A;RGS5;ATP1B1;ANGPTL1;KIAA1614;GLUL;NCF2;PTGS2…	RER1;CLSTN1;PINK1;CLIC4;CD52;LAPTM5;ZCCHC17;MACF1;EFCAB14;OSBPL9;PLPP3;NFIA;GADD45A;PKN2;GBP2;CNN3;SORT1;TXNIP;SELENBP1;PSMB4;S100A10;RAB13;CCT3;MEF2D;NAXE;MGST3;TMCO1;RASAL2;FAM129A;PTGS2;PTPRC;PPP1R12B;NFASC;RASSF5;CD46;MIR29B2CHG;G0S2;NENF;EPRS;DUSP10;CDC42BPA;COX20;YWHAQ;ROCK2;DDX1;ADCY3;PPM1G;LTBP1;RHOQ;CFAP36;REL;CCT4;UGP2;ANTXR1;SUCLG1;CAPG;VAMP8;DUSP2;REV1;IL1B;COBLL1;GALNT3;PLEKHA3;ITGA4…	PRDM16;PHF13;KAZN;TMEM51;EPHA2;MFAP2;ARHGEF10L;OTUD3;CAMK2N1;TCEA3;ID3;CD52;TRNP1;FAM76A;LAPTM5;SDC3;TINAGL1;LCK;TMEM54;ZNF362;GJA4;AL050341.2;B4GALT2;SLC6A9;MOB3C;FOXD2;CDKN2C;ZFYVE9;ZYG11B;PLPP3;DOCK7;CACHD1;WLS;NEXN;ADGRL2;TTLL7;CYR61;TMEM56;SNX7;SORT1;C1orf162;CD2;PTGFRN;ANKRD35;ITGA10;CTSK;SEMA6C;S100A10;IL6R;THBS3;NES;CD84;CD48;FCGR3A;DDR2;RGS5;MGST3;MPZL1;XCL1;FMO2;NCF2;PLA2G4A;RGS1;PTPRC;…	PLA2G2A;HP1BP3;ID3;SRSF10;CD52;LAPTM5;PSMB2;MACF1;PRDX1;LEPROT;C1orf162;RAP1A;CSDE1;TXNIP;MRPS21;RAB13;MEF2D;MGST3;TMCO1;PTPRC;CSRP1;NENF;ROCK2;RHOB;MRPL33;CRIM1;RHOQ;MTHFD2;MAT2A;VAMP8;IGKC;COX5B;EIF5B;SLC20A1;PPIG;SF3B1;IGFBP5;ARL4C;HDLBP;GOLGA4;CTNNB1;NKTR;MAP4;PCNP;ZBTB20;CNBP;LPP;WDR1;SOD3;SEC31A;AIMP1;ANXA5;CPE;SELENOP;NDUFS4;IQGAP2;UQCRQ;C5orf24;HSPA9;MZB1;CYSTM1;IK;NDFIP1;NR3C1;LARS;CD74;…	CD52;TENT5B;GJA5;ECM1;S100A10;NMNAT2;RAB7B;REEP1;TMEFF2;TUBA4A;PID1;FBLN2;ABHD14A;LSAMP;RARRES1;IQCJ-SCHIP1;EHHADH;APOD;PDGFRA;ADGRL3;SFRP2;C7;DNAJC18;KCTD16;IL17B;ETV7;ADGRF5;PRIM2;LINC02523;LAMA2;LINC01615;GRB10;DGKI;GPR173;HDX;LZTS1;TRIM35;TCIM;SFRP1;PLAT;RDH10;PAG1;FABP5;SYBU;CCL21;UNC13B;MIR181A2HG;HMCN2;PTGDS;IFITM1;MDK;MALAT1;FXYD6;LINC00702;ABLIM1;AL731571.1;ARHGDIB;CNTN1;ACVRL1;LINC02381…	AL645608.8;HES4;SCNN1D;MXRA8;PHF13;MIR34AHG;AL139423.1;C1orf167;KAZN;EPHA2;MFAP2;PADI2;PINK1;PINK1-AS;LDLRAD2;WNT4;PAQR7;SH3BGRL3;CD52;TENT5B;BX293535.1;PTPRU;LAPTM5;SDC3;TINAGL1;LCK;FAM229A;TMEM54;COL8A2;AL591845.1;OSCP1;BMP8B;AL050341.2;RIMS3;FOXO6;HYI;CCDC24;SLC6A9;ZSWIM5;CCDC17;LURAP1;CYP4X1;FOXD2;TRABD2B;SPATA6;ZFYVE9;COA7;PODN;ROR1;CACHD1;FPGT-TNNI3K;NEXN;TTLL7;AC092807.3;BCAR3;AC105942.1;T…	ITGA10;ARHGAP30;ZBED6;PLXNA2;PFN4;LINC01936;STAB1;BHMT2;LOX;LEAP2;DNAJC18;PCDHGA5;SGCD;C4B;AARS2;DGKB;DGKI;RAB9B;AMOT;TCIM;SFRP1;PLAT;SLCO5A1;AIF1L;KCNT1;PLEKHA7;MDK;MALAT1;KLHL35;PHYHIPL;ARHGDIB;LUM;SRRM4;MEDAG;ARHGEF7-AS2;ARG2;LTBP2;MEG8;LINC00924;LINC01290;SALL1;MMP2;RASD1;AC124066.1;LINC01752;ZNF763;APOBEC3F;AP001505.1;MT-CO1
CMP	0	0	0	VWA1;NADK;AL139246.5;ACOT7;GPR157;CASZ1;TNFRSF1B;FBLIM1;PLA2G2A;C1QA;C1QC;C1QB;TCEA3;RPL11;IFNLR1;AHDC1;SERINC2;MARCKSL1;YBX1;ARMH1;RPS8;TSPAN1;FAAH;MOB3C;PDZK1IP1;RAB3B;DHCR24;PATJ;WLS;GNG5;SPATA1;GBP2;GBP4;F3;SNX7;SLC35A3;AC093157.1;GPR89A;GPR89B;PDE4DIP;PLEKHO1;C1orf54;TARS2;CTSS;GABPB2;OAZ3;S100A11;CREB3L4;RAB25;MNDA;HSPA6;FCGR2B;STX6;NPL;RGL1;FAM129A;PTPRC;ELF3;FMOD;LAX1;SRGAP2;G0S2;AC092803…	C1orf159;VWA1;ATAD3C;SMIM1;NPHP4;GPR153;TNFRSF25;UTS2;PIK3CD;RBP7;TNFRSF1B;PQLC2;PLA2G2A;HSPG2;ZNF436;ASAP3;ID3;FAM110D;FAM167B;AZIN2;AC004865.2;EVA1B;MACF1;TIE1;MAST2;PIK3R3;PLPP3;LEPR;GNG12;LINC01140;GBP2;GBP4;TGFBR3;ARHGAP29;CNN3;PALMD;KCNC4;PTPN22;SRGAP2C;SRGAP2B;ITGA10;LYSMD1;S100A10;S100A13;RAB13;ADAM15;EFNA1;IFI16;ACKR1;DUSP23;ARHGAP30;FCER1G;AL359541.1;RGS5;FAM78B;SELE;METTL18;ANKRD45;RGS…	AL669831.5;C1orf159;TNFRSF4;SDF4;MRPL20;VWA1;SSU72;SLC35E2A;NADK;GNB1;PEX10;FAM213B;MMEL1;ARHGEF16;MEGF6;RPL22;ICMT;PARK7;RERE;CLSTN1;CASZ1;AGTRAP;MFN2;DHRS3;AC254633.1;DDI2;ALDH4A1;AKR7A2;PQLC2;MINOS1;NBL1;TMCO4;PLA2G2A;UBXN10-AS1;UBXN10;HP1BP3;ECE1;NBPF3;HNRNPR;TCEA3;RPL11;NIPAL3;RCAN3;SRRM1;TMEM50A;LDLRAP1;MAN1C1;CNKSR1;HMGN2;PIGV;SFN;SYTL1;MAP3K6;WASF2;IFI6;PTAFR;ATP5IF1;AL353622.1;RCC1;LAPTM…	KLHL17;C1orf159;VWA1;SFN;TMEM54;EVA1B;PLK3;FOXD2;SGIP1;GNG12;WLS;GBP4;TGFBR3;AC093157.1;AL356488.3;CSF1;AL355488.1;WNT2B;LIX1L-AS1;NUDT4B;HIST2H2BE;C1orf54;MINDY1;SELENBP1;EFNA1;MNDA;ACKR1;PIGM;CD48;GPR161;XCL2;METTL18;GLUL;RGL1;PTPRC;PHLDA3;SHISA4;FMOD;ATP2B4;SLC45A3;CD55;LAMB3;HHAT;KCTD3;AC096642.1;EPHX1;AL356512.1;PXDN;AC231981.1;RNASEH1-AS1;ASAP2;EMILIN1;MEMO1;LTBP1;CYP1B1;SLC8A1;PLEKHH2;AC01…	VWA1;PLA2G2A;TCEA3;PNRC2;CD52;DNAJC8;KHDRBS1;TMEM54;AKR1A1;NASP;TUT4;MAGOH;JUN;DNTTIP2;TMEM56;AHCYL1;CAPZA1;BCAS2;PHGDH;RBM8A;MCL1;S100A4;TPM3;LMNA;CCT3;PBX1;PRRC2C;GLUL;RGS1;RGS2;PTPRC;PTPN7;BTG2;KCTD3;MARC1;IRF2BP2;GCSAML;BABAM2;SRSF7;ANXA4;TMSB10;CAPG;ACTR3;ARHGAP15;KIF5C;HNRNPA3;NFE2L2;CAVIN2;PCGEM1;BZW1;METTL21A;SP100;ITM2C;LRRFIP1;SEPT2;CMTM6;CSRNP1;EIF1B;CTNNB1;NKTR;LAMB2;GNAI2;ARL6IP5;FOX…	VWA1;FBLIM1;C1QB;TCEA3;RSRP1;SH3BGRL3;CD52;HMGN2;LAPTM5;TMEM54;LINC01748;LPAR3;LMO4;S100A10;S100A11;S100A6;S100A4;LMNA;ACKR1;SELE;PRRC2C;PRDX6;GLUL;PTGS2;SLC45A3;NUCKS1;IRF6;EPHX1;MAP3K21;LAPTM4A;OST4;FOSL2;KCNG3;RPS27A;TCF7L1;ACTR3;CCDC148;TMEFF2;SF3B1;EEF1B2;IGFBP5;MLPH;LRRFIP1;HYAL2;SPCS1;CACNA1D;NDUFB4;SERP1;TIPARP;IQCJ-SCHIP1;SEC62;NAALADL2;AP2M1;RPL35A;APBB2;KIT;IGFBP7;HPGDS;EMCN;IL2;SLC7A1…	LINC00115;NADK;RBP7;TNFRSF1B;FBLIM1;PLA2G2A;C1QA;C1QC;C1QB;FUCA1;AHDC1;FGR;RCC1;RAB42;SDC3;SERINC2;EVA1B;YBX1;ATP6V0B;ARMH1;MAST2;MOB3C;COA7;TCEANC2;GBP2;GBP4;LRRC8D;F3;SNX7;SORT1;ADORA3;DCLRE1B;GPR89A;NBPF10;ACP6;PDE4DIP;PLEKHO1;CTSS;S100A10;S100A11;S100A9;S100A8;EFNA1;GBA;MNDA;PIGM;LY9;FCER1G;FCGR2A;HSPA6;FCGR2B;MGST3;UCK2;CREG1;SOAT1;STX6;NPL;ARPC5;FAM129A;PTPRC;MIR181A1HG;CHI3L1;SRGAP2;LAMB3;…	NADK;TNFRSF1B;KAZN;UBXN10;HSPG2;C1QA;C1QC;C1QB;TRIM63;FGR;RCC1;TINAGL1;DLGAP3;CSF3R;MAST2;TAL1;LINC01140;GBP2;GBP4;AMPD2;TMIGD3;SRGAP2C;SRGAP2B;PLEKHO1;CTSS;S100A10;S100A11;S100A9;S100A8;NTRK1;MNDA;FCER1G;FCGR2A;HSPA6;FCGR2B;AL359541.1;UCK2;SELL;CENPL;ARPC5;FAM129A;PTPRC;SRGAP2;CD55;G0S2;SLC30A1;AC092803.2;H3F3A;PGBD5;DISC1;EDARADD;OPN3;CHML;MFSD2B;MEMO1;CYP1B1;DHX57;SLC8A1;ZFP36L2;ACTR2;CNRIP1;P…	AL645608.9;CASZ1;KDF1;RCC1;ZBTB8B;L1TD1;TSPAN2;PHGDH;S100A9;S100A8;S100A5;EFNA1;MNDA;SLAMF1;GPR161;METTL18;G0S2;KCTD3;TRIM58;RNASEH1-AS1;LTBP1;SLC8A1;AC017083.1;MXD1;IL1B;IL1RN;AC074099.1;CCDC148;FAM171B;HSPE1;IGFBP5;SLC11A1;AC018816.1;TSEN2;AC097359.2;ACVR2B;SLC26A6;CACNA2D3;EIF4E3;TM4SF1;AC092953.2;MELTF-AS1;SLC2A9;IGFBP7;CXCL1;EREG;SPARCL1;TMEM144;ACSL1;SRD5A1;SNX18;OCLN;HSPA9;HBEGF;PCDHGA6;ND…	AL645608.8;GPR153;TNFRSF1B;PLA2G2A;UBXN10-AS1;TINAGL1;HIVEP3;TSPAN2;SLAMF6;LY9;HSPA6;CD247;XCL2;XCL1;SELL;JMJD4;LINC01871;GNLY;CD8A;CXCR4;IGFBP2;EXOG;USP19;INKA1;HYAL3;LINC00877;CD96;ADPRH;CHCHD6;ACPP;SPON2;CTBP1-DT;ARAP2;HOPX;AC098818.2;TSPAN5;CENPE;ALPK1;IL7R;EMB;PARP8;GZMK;GZMA;AC010280.2;GCNT4;CAMK4;GFRA3;KCNMB1;ERVFRD-1;MAPK13;PRDM1;ENPP3;PDE7B;PERP;CDCA7L;TRGC2;INHBA;VWC2;AUTS2;CLDN4;RASA4;…	ATAD3C;PLA2G2A;SFN;AHDC1;AZIN2;PRDX1;PPM1J;BCAS2;CSDE1;PHGDH;GPR89A;TXNIP;TDRKH;MNDA;LY9;IER5;GLUL;RGS1;PPP1R15B;SLC45A3;RHEX;C1orf116;ZBTB18;SLC3A1;ANXA4;GNLY;IGKC;DUSP2;C2orf92;RANBP2;NCKAP5;NR4A2;SF3B1;IGFBP5;MLPH;EDEM1;ANKRD28;UBE2E2;CSRNP1;ATRIP;USP19;FOXP1;GATA2;CNBP;AC008040.5;TNFSF10;CLCN2;CCDC50;RHOH;JCHAIN;AREG;ANXA3;BANK1;NFKB1;SLC7A11;TLR3;DEPDC1B;TMCO6;CD74;CANX;LTC4S;IRF4;AL357054.4…	VWA1;AL139246.5;FBXO44;TNFRSF1B;CAMK2N1;SFN;TRNP1;MAP3K6;AHDC1;KIAA1522;TMEM54;EVA1B;ZC3H12A;MOB3C;FOXD2;SGIP1;GNG12;HHLA3;GBP2;GBP4;SNX7;AC093157.1;C1orf162;PHGDH;ECM1;SELENBP1;S100A13;NTRK1;FCER1A;CD48;FCER1G;HSPA6;DDR2;GPR161;PRRX1;RGL1;FAM129A;RGS1;RGS13;CAMSAP2;CSRP1;FMOD;ATP2B4;CDK18;SLC45A3;RASSF5;LAMB3;VASH2;KCTD3;MARC1;EPHX1;CDC42BPA;AGT;EDARADD;PXDN;ASAP2;RHOB;EMILIN1;RBKS;CRIM1;CYP1B1;…	AL645608.8;SMIM1;GPR153;AL031283.1;FBLIM1;PADI2;LDLRAD2;AL445686.2;PTAFR;LCK;LURAP1;TRABD2B;SPATA6;ACOT11;SAMD13;GBP5;EVI5;CELSR2;SORT1;ADORA3;CD2;AL592494.3;AC246785.3;ECM1;SHE;NTRK1;FCER1A;CASQ1;SLAMF6;FCER1G;FCGR2A;CD247;XCL2;XCL1;PTGS2;PTPRC;NAV1;SOX13;MARC2;AL391832.1;AL391832.2;LINC01871;HAAO;ZFP36L2;BCL11A;LGALSL;LBX2;LBX2-AS1;HK2;GNLY;CD8A;CD8B;THNSL2;ITPRIPL1;MGAT4A;IL1RL1;CXCR4;ZEB2-AS1…	LINC00115;TNFRSF18;VWA1;AL139246.5;ACOT7;C1orf167;CAMK2N1;CD52;TRNP1;MAP3K6;AHDC1;EVA1B;B4GALT2;ARMH1;MOB3C;FOXD2;EFCAB7;GNG12;TTLL7;GBP2;TGFBR3;CNN3;SNX7;VAV3;SORT1;KCNC4;C1orf162;TSPAN2;SRGAP2B;GPR89A;ACP6;PDE4DIP;TNFAIP8L2;SELENBP1;AL358472.4;PAQR6;CD84;CD48;ARHGAP30;FCER1G;DDR2;RGS5;MGST3;GPR161;PRRX1;RGL1;FAM129A;RGS1;CAMSAP2;PHLDA3;CSRP1;PPP1R12B;ATP2B4;LAX1;CDK18;RASSF5;TRAF3IP3;C1orf115;E…
DC	0	0	0	0	TNFRSF18;ANKRD65;VWA1;FNDC10;SLC2A5;RBP7;EPHA2;IGSF21;HSPG2;C1QA;C1QC;C1QB;IFNLR1;RUNX3;THEMIS2;DLGAP3;PLPP3;PRKAA2;LEPR;ADGRL2;MCOLN2;SYDE2;TGFBR3;ARHGAP29;PALMD;VCAM1;S1PR1;KCNC4;C1orf162;PTPN22;OLFML3;NOTCH2NL;NBPF14;MLLT11;S100A6;NPR1;KCNN3;ADAM15;AL138899.1;MNDA;ACKR1;CD84;ARHGAP30;FCER1G;FCGR2A;SELE;DNM3;NPL;LINC01351;RGS1;RGS13;RGS2;PTPRC;PTPN7;PCAT6;IKBKE;RASSF5;PLXNA2;G0S2;ESRRG;SPATA17;…	RBP7;FHAD1;KIF17;ZBTB40;C1QA;C1QC;C1QB;AL445686.2;FGR;THEMIS2;PTAFR;LAPTM5;FABP3;CSF3R;ELAVL4;LRRC8C;S1PR1;AC245595.1;FCGR1A;ADAMTSL4;CTSS;AL391069.3;TCHH;SYT11;CD1D;AIM2;FCER1A;SLAMF8;SLAMF7;NECTIN4;FCER1G;FCGR2A;FCGR3A;RCSD1;NPL;RGS1;ASPM;SLC45A3;IL10;PIGR;CR1;LAMB3;HLX;KMO;ZNF695;RSAD2;RASGRP3;CYP1B1;AC018682.1;REL;LINC00309;PLEK;ARHGAP25;LOXL3;TRABD2A;LINC01943;RGPD2;ADRA2B;NCAPH;AC016738.1;I…	PEX10;DHRS3;RCC2;USP48;C1QB;TCEA3;TMEM50A;PTP4A2;AK2;MRPS15;PTPRF;AKR1A1;TSPAN1;RAB3B;NEXN;FNBP1L;ATP5PB;SEC22B;PLEKHO1;C1orf54;S100A10;FDPS;LAMTOR2;ETV3;MNDA;PEA15;CD48;FCGR2A;HSPA6;RGS5;MPC2;SFT2D2;TOR3A;SOAT1;GLUL;PTPRC;ELF3;SLC45A3;RAB7B;CD55;G0S2;BATF3;LBR;PARP1;NID1;RAB10;DPY30;CYP1B1;SLC8A1;PSME4;USP34;XPO1;AFTPH;AAK1;MXD1;BOLA3;VAMP8;AFF3;FHL2;TMEM87B;PLEKHB2;PLA2R1;PSMD14;SLC38A11;CSRNP3…	SDF4;CCNL2;GNB1;RER1;CAMTA1;VAMP3;RERE;LZIC;SPEN;NECAP2;RCC2;CAMK2N1;HP1BP3;EIF4G3;HNRNPR;ID3;PITHD1;PNRC2;TMEM50A;CD52;SFN;NUDC;WASF2;STX12;DNAJC8;SERINC2;PTP4A2;KHDRBS1;MARCKSL1;RBBP4;AK2;MAP7D1;LSM10;RLF;SMAP2;PPCS;ELOVL1;MED8;PTPRF;AKR1A1;NASP;GPBP1L1;EFCAB14;RNF11;OSBPL9;NRDC;TUT4;C1orf123;MAGOH;JUN;NFIA;JAK1;SERBP1;TYW3;ACADM;USP33;FUBP1;PRKACB;GNG5;MCOLN2;PKN2;ZNF644;TMED5;DNTTIP2;ARHGAP29…	SDF4;MRPL20;TNFRSF14;RPL22;CAMTA1;PARK7;ENO1;SPEN;CAPZB;MINOS1;CDC42;C1QA;C1QC;C1QB;PNRC2;RUNX3;RSRP1;SH3BGRL3;HMGN2;NUDC;DNAJC8;LAPTM5;PTP4A2;EIF3I;MARCKSL1;C1orf122;NDUFS5;CAP1;PPT1;PPCS;YBX1;UQCRH;RAB3B;LMO4;RPL5;LAMTOR5;CAPZA1;ATP1A1;SEC22B;AC245014.3;PLEKHO1;MRPS21;S100A10;S100A11;S100A4;JTB;LAMTOR2;COPA;CD84;TSTD1;PFDN2;MGST3;MPC2;SELE;PRRC2C;PRDX6;FAM129A;PTGS2;PTPRC;SLC45A3;NUCKS1;G0S2;SR…	ZBTB17;CD52;KDF1;PLPP3;PTGFR;AC118553.2;AMIGO1;ADORA3;S100A6;CD1E;OLFML2B;TNFSF4;PKP1;C1orf116;CR1;SPATA17;CYP1B1;CLEC4F;DNAH6;CD8A;C2orf15;IL18R1;TMEM37;DHRS9;HAGLROS;PCGEM1;ACADL;CYP27A1;IHH;SLC4A3;ZCWPW2;PLCD1;PSMD6-AS2;CADM2;BTLA;ALDH1L1;AGTR1;RARRES1;CLNK;CXCL13;FHDC1;C5orf49;ANKRD33B;RANBP3L;ITGA2;SHLD3;AC010273.2;LHFPL2;FOXC1;PRSS16;HLA-DOB;MDFI;PTPRK;HOXA3;GJC3;ACHE;PTN;FAM239B;WNK3;NAP1L…	TNFRSF18;MMEL1;RBP7;LINC01355;ASAP3;DNALI1;PDZK1IP1;FYB2;HOOK1;DNASE2B;PIFO;KCND3;LINC00624;OAZ3;S100A9;TNFSF4;KCNK1;EDARADD;KCNS3;CCDC121;CYP1B1;TMEM178A;REEP1;PROM2;TNFAIP6;PCGEM1;MAP2;CFAP65;IHH;AC104667.2;MYRIP;ZNF662;PLXNB1;PDZRN3;CNTN3;VGLL3;STX19;DUBR;PLCXD2;PHLDB2;BTLA;AC092910.3;PXYLP1;WWTR1;LINC01213;ARHGEF26;MME;PTX3;MELTF-AS1;NSG1;LINC01088;PCAT4;MAPK10;TMEM154;SLC25A4;ADCY2;ANKRD33B;…	SSU72;RER1;PEX10;ACOT7;TNFRSF1B;DHRS3;UBXN10-AS1;TCEA3;SRSF10;RUNX3;STX12;ATP5IF1;PHACTR4;HDAC1;MARCKSL1;TRAPPC3;ARMH1;EFCAB14;NRDC;ECHDC2;TACSTD2;NFIA;GADD45A;PKN2;FNBP1L;F3;SLC25A24;GNAI3;DRAM2;TXNIP;PLEKHO1;PSMB4;POGZ;S100A9;RAB13;DAP3;LAMTOR2;CCT3;ETV3;HSPA6;UAP1;TMCO1;CREG1;MPC2;TOR3A;C1orf21;FAM129A;AL136987.1;B3GALT2;LAX1;CD46;MIR29B2CHG;LPGAT1;NENF;EPRS;PARP1;RAB4A;CEP170;SH3YL1;YWHAQ;PPM…	AGRN;FNDC10;SLC35E2A;NADK;FAM213B;GPR157;MIR34AHG;PIK3CD-AS2;TMEM51;ATP13A2;IGSF21;CAMK2N1;C1QA;C1QC;C1QB;LINC01355;ASAP3;IFNLR1;ZNF683;SMPDL3B;RAB42;SDC3;LCK;TMEM54;RNF19B;AZIN2;ZNF362;AGO4;AGO1;OSCP1;CSF3R;DNALI1;MANEAL;ZFP69B;RIMKLA;TMEM125;C1orf210;SZT2;PDZK1IP1;CDKN2C;TTC39A;CPT2;HOOK1;DOCK7;WLS;PTGER3;TTLL7;SPATA1;SSX2IP;LPAR3;SYDE2;DDAH1;HS2ST1;LRRC8B;BCAR3;TMEM56;SORT1;PIFO;CTTNBP2NL;HMGC…	FAAP20;TNFRSF14;C1QB;TCEA3;SRSF10;RUNX3;MARCKSL1;PSMB2;MEAF6;MACF1;PPCS;PRDX1;CMPK1;SCP2;PSMA5;RAP1A;CSDE1;CD58;TXNIP;MRPS21;CREB3L4;C1orf43;ADAR;MNDA;PEA15;CD48;PFDN2;UAP1;TMCO1;CACYBP;IER5;GLUL;RGS1;PPP1R15B;ELK4;SLC45A3;G0S2;NENF;MIA3;DEGS1;RAB4A;RHOB;HADHB;MRPL33;RHOQ;ACTR2;NAGK;MTHFD2;TGOLN2;MAT2A;RNF181;IGKC;DUSP2;COX5B;MGAT4A;EIF5B;LIMS1;RANBP2;IL1B;NR4A2;TANK;PPIG;SLC39A10;SF3B1;IDH1;MLPH…	TNFRSF1B;PADI2;PLA2G2A;C1QA;C1QC;GALE;NIPAL3;RPS6KA1;SYTL1;THEMIS2;SERINC2;KIAA1522;RNF19B;CSF3R;ZC3H12A;FAAH;RAB3B;PLPP3;TACSTD2;AK4;LEPR;NEXN;ADGRL2;LPAR3;MCOLN2;CYR61;TGFBR3;PALMD;KIAA1324;GSTM5;RBM15;SLC16A4;PIFO;C1orf162;HMGCS2;ANKRD35;CTSS;CTSK;TNFAIP8L2;RORC;S100A6;DENND4B;CREB3L4;IL6R;FCER1A;CD48;SLAMF7;TSTD1;FCER1G;FCGR2A;FCGR3A;OLFML2B;DDR2;RGS5;NCF2;RGS1;MIR181A1HG;ELF3;SLC45A3;RAB7B;R…	PERM1;AL645608.8;AGRN;AL390719.2;SCNN1D;FNDC10;SMIM1;GPR153;MIR34AHG;SLC25A33;PLOD1;KAZN;TMEM51;FHAD1;ALDH4A1;PINK1-AS;WNT4;C1QA;C1QC;C1QB;LINC01355;CD52;ZNF683;FGR;SMPDL3B;PTAFR;PTPRU;SDC3;IQCC;LCK;RNF19B;COL8A2;OSCP1;MANEAL;MYCL;RIMKLA;LURAP1;PDZK1IP1;SPATA6;COA7;CYB5RL;FYB2;DAB1;CYP2J2;ROR1;ST6GALNAC5;TTLL7;SAMD13;SPATA1;MCOLN3;EVI5;BCAR3;AC118553.1;CELSR2;SORT1;AMIGO1;OVGP1;OLFML3;VANGL1;CD2;…	TNFRSF18;MMEL1;GPR157;TNFRSF1B;PLA2G2A;RAP1GAP;C1QA;C1QC;C1QB;THEMIS2;SMPDL3B;RAB42;LAPTM5;ZC3H12A;MANEAL;COL9A2;SLC2A1;TMEM125;PDZK1IP1;TTC39A;PLPP3;HOOK1;NEXN;ADGRL2;DNASE2B;SPATA1;MCOLN2;CYR61;TGFBR3;CDC14A;AC093157.1;VAV3;CD53;C1orf162;KCND3;ZNF697;ANKRD35;FCGR1A;CTSS;TNFAIP8L2;AL391069.3;RORC;S100A6;MNDA;CD48;LY9;F11R;ARHGAP30;FCER1G;FCGR2A;FCGR3A;DDR2;RGS5;F5;SELL;NCF2;RGS1;PTPRC;MIR181A1HG…
Endothelial_cells	0	0	0	0	0	PERM1;AL390719.2;TNFRSF18;FNDC10;AL109917.1;GABRD;PLCH2;PRDM16;ARHGEF16;SMIM1;ESPN;ENO1-AS1;AC254633.1;CDA;ALPL;IFNLR1;KDF1;FCN3;FGR;SMPDL3B;AL353622.1;BMP8B;C1orf210;TAL1;TRABD2B;PODN;AC119674.1;AC119674.2;PRKAA2;TACSTD2;ST6GALNAC3;ADGRL4;AL359504.2;SYDE2;EPHX4;KIAA1324;PPM1J;SLC22A15;REG4;HIST2H4A;HIST2H2AA4;SV2A;C1orf54;SEMA6C;FLG-AS1;S100A2;SYT11;PEAR1;CADM3-AS1;ACKR1;CFAP45;SELE;DNM3;TNFSF4;…	VWA1;DHRS3;FHAD1;ARHGEF10L;HSPG2;CLIC4;TMEM50A;SELENON;LINC01715;BMP8B;PLPP3;LRRIQ3;IFI44L;SYDE2;ODF2L;LRRC8C;TGFBR3;ARHGAP29;S100A10;S100A13;EFNA1;FDPS;LAMTOR2;BGLAP;IFI16;ACKR1;DUSP23;RGS5;SFT2D2;AL021068.1;RASAL2;AL162431.2;GLUL;COLGALT2;IVNS1ABP;RAB7B;IKBKE;CD55;CD34;PPP2R5A;HLX;CAPN2;RHOU;FAM89A;AHCTF1;PUM2;CLIP4;AC018682.1;USP34;LINC01873;POLE4;VAMP5;KCNIP3;IL1R1;CCDC74B;ZEB2-AS1;RPRM;PKP4;…	SDF4;CCNL2;VWA1;FNDC10;GNB1;CAMTA1;VAMP3;RERE;RBP7;SPEN;NECAP2;PINK1;HP1BP3;EIF4G3;KDM1A;HNRNPR;ID3;PNRC2;TMEM50A;WASF2;STX12;DNAJC8;YTHDF2;PUM1;KHDRBS1;KPNA6;FAM167B;MARCKSL1;RBBP4;AK2;SFPQ;KIAA0319L;MAP7D1;ELOVL1;AKR1A1;NASP;GPBP1L1;EFCAB14;RNF11;NRDC;TUT4;ZYG11B;C1orf123;MAGOH;JUN;NFIA;JAK1;LEPR;SERBP1;GNG12;ACADM;USP33;FUBP1;ADGRL2;GNG5;MCOLN2;SYDE2;BCL10;PKN2;ZNF644;DNTTIP2;ARHGAP29;PALMD;SL…	MRPL20;VWA1;TNFRSF9;FHAD1;MINOS1;HSPG2;CDC42;C1QB;LUZP1;ID3;RUNX3;RSRP1;SH3BGRL3;HMGN2;DNAJC8;PHACTR4;EIF3I;MARCKSL1;MACF1;LINC01748;NFIA;ADGRL4;SH3GLB1;PKN2;ARHGAP29;CNN3;VCAM1;PTPN22;ATP1A1;HIST2H4A;S100A10;S100A11;S100A6;ADAR;TAGLN2;CD84;MGST3;SELP;PRRC2C;PRDX6;TPR;LAX1;NUCKS1;IL10;CD55;ITPKB-AS1;ARF1;MAP3K21;KCNK1;ARID4B;PDIA6;ROCK2;LAPTM4A;OST4;FOSL2;PLB1;PPP1CB;CLIP4;EIF2AK2;SOS1;EPAS1;SPTB…	ATAD3C;GABRD;KCNAB2;PLEKHG5;PIK3CD;TMEM51;EPHA2;ARHGEF19;ARHGEF10L;C1QA;C1QC;C1QB;ZNF436;RUNX3;FAM110D;CD52;LAPTM5;AC119674.1;RAVER2;SGIP1;CDC7;TGFBR3;AC104506.1;SLC16A4;CD53;C1orf162;TMIGD3;PTPN22;OLFML3;NBPF14;SV2A;MTMR11;CTSS;CTSK;SEMA6C;LYSMD1;S100A11;S100A9;AL358472.4;SHE;KCNN3;PEAR1;MNDA;CADM3-AS1;CD84;CD48;ARHGAP30;FCER1G;FCGR2A;FCGR3A;FCGR2B;SELP;DNM3;NPL;RGS1;RGS2;PTPRC;CHIT1;NFASC;IKBKE…	ATAD3C;FNDC10;KAZN;TMEM51;EPHA2;ARHGEF10L;C1QA;C1QC;C1QB;EPHB2;ASAP3;RUNX3;CD52;MAP3K6;AHDC1;LAPTM5;FAM167B;DLGAP3;RIMKLA;AC119674.2;CACHD1;ST6GALNAC3;GIPC2;CDC7;TGFBR3;AC104506.1;S1PR1;CD53;C1orf162;TSPAN2;FP700111.1;AC245014.3;ITGA10;NOTCH2NL;ECM1;CTSS;SEMA6C;S100A9;S100A12;S100A8;S100A4;NPR1;KCNN3;MEX3A;PEAR1;CD1D;CD1C;MNDA;ACKR1;FCER1A;CD48;FCER1G;FCGR2A;FCGR3A;OLFML2B;DDR2;DNM3;SEC16B;KIAA16…	TNFRSF18;SKI;RER1;CLSTN1;TNFRSF1B;DHRS3;AGMAT;CDA;PINK1;ECE1;SRSF10;CLIC4;RUNX3;SELENON;PHACTR4;HDAC1;MARCKSL1;MACF1;AL512353.1;PIK3R3;EFCAB14;NRDC;PLPP3;NFIA;L1TD1;JAK1;BCL10;ODF2L;PKN2;CNN3;S1PR1;GNAI3;PTPN22;TXNIP;PSMB4;POGZ;S100A10;S100A9;S100A8;S100A13;RAB13;SHE;SHC1;EFNA1;LAMTOR2;MNDA;IFI16;LINC01133;CD84;SLAMF1;CD48;ARHGAP30;ATF6;TMCO1;CD247;RASAL2;QSOX1;RGS16;C1orf21;B3GALT2;PTPN7;LAX1;IK…	AGRN;ATAD3C;PLOD1;EPHA2;CDA;NBPF3;ALPL;ZNF436;ASAP3;RUNX3;LCK;AZIN2;GJA4;EXO5;TIE1;ZSWIM5;PLPP3;RAVER2;GIPC2;LRRC8C-DT;LRRC8C;AL160006.1;KCNC4;C1orf162;DENND2C;CD2;ZNF697;HMGCS2;AC246785.3;ITGA10;SV2A;C1orf54;ECM1;MINDY1;SEMA6C;AL391069.3;S100A16;NPR1;AL358472.4;KCNN3;FAM189B;MEX3A;FCER1A;CFAP45;UCK2;GPR161;XCL2;XCL1;SELE;SEC16B;LAMC1;RGL1;HMCN1;PTPRC;PTPN7;NFASC;FAM72A;IKBKE;RASSF5;DYRK3;TRAF3IP…	PIK3CD-AS2;ID3;SRSF10;RUNX3;SRSF4;MARCKSL1;MACF1;PRDX1;NASP;SCP2;LEPROT;ZNF644;RAP1A;AMPD1;CSDE1;TXNIP;NBPF14;RAB13;ADAR;SHC1;ADAM15;MNDA;IFI16;PEA15;PFDN2;FCER1G;TMCO1;IER5;GLUL;COLGALT2;IVNS1ABP;TROVE2;RHEX;CD55;ESRRG;MIA3;CDC42BPA;RHOU;ROCK2;RHOB;EMILIN1;MRPL33;PLB1;CRIM1;FEZ2;SPTBN1;USP34;ZNF638;HK2;TGOLN2;GNLY;IGKC;COX5B;MGAT4A;AC109826.1;EIF5B;MAP4K4;LIMS1;RANBP2;CYTIP;BAZ2B;PPIG;SSFA2;SLC3…	HSPB7;PLA2G2A;CAMK2N1;ASAP3;GALE;TMEM200B;FAM167B;KIAA1522;ZC3H12A;TIE1;PIK3R3;CYP4X1;RAB3B;TACSTD2;ROR1;GIPC2;PALMD;S1PR1;AL356488.2;ANKRD35;ITGA10;NOTCH2NL;GJA5;NBPF14;CTSK;S100A16;DENND4B;SHE;ACKR1;DUSP23;OLFML2B;RGS5;UCK2;SELP;DNM3;CENPL;COLGALT2;ELF3;PIK3C2B;CDK18;SLC45A3;PLXNA2;C1orf115;CCSAP;AGT;AL390728.6;ADCY3;RASGRP3;PKDCC;PLEKHH2;CCDC85A;ARHGAP25;LOXL3;MGAT4A;KIAA1211L;FBLN7;INHBB;CCDC…	AGRN;C1QTNF12;ANKRD65;ATAD3C;GABRD;NPHP4;PLEKHG5;MIR34AHG;PIK3CD;PLOD1;KAZN;TMEM51;NBPF1;MFAP2;CDA;RAP1GAP;LDLRAD2;HSPG2;ZNF436-AS1;ASAP3;FAM110D;CD52;MAP3K6;THEMIS2;PTAFR;SDC3;FAM167B;ZBTB8A;SH3D21;OSCP1;RIMKLA;B4GALT2;MAST2;LURAP1;SPATA6;BEND5;ZFYVE9;CYB5RL;TTC22;AC119674.1;PLPP3;AL136985.3;SGIP1;ST6GALNAC3;GIPC2;SAMD13;DNASE2B;EPHX4;BCAR3;TMEM56;AC104506.1;SORT1;KCNA3;DENND2C;VANGL1;CD101;ZNF6…	ATAD3C;ACOT7;PLEKHG5;TMEM51;FAM43B;CDA;ZNF436;ASAP3;FAM110D;TRNP1;FGR;TMEM200B;RIMS3;TIE1;CYP4X1;TTC39A;AC119674.1;ROR1;LEPR;NEXN;GIPC2;SYDE2;VAV3;NBPF14;S100A16;KCNN3;ACKR1;F11R;OLFML2B;RGS5;UCK2;FMO2;IVNS1ABP;HMCN1;PPP1R12B;CDK18;RAB7B;CD34;PLXNA2;PROX1;DNAH14;AGT;GNG4;CMPK2;ADCY3;CLIP4;ARHGAP25;CYP26B1;AC007681.1;IL18R1;C2orf40;INHBB;AC010976.2;CCDC74A;ZEB2-AS1;LYPD6B;LY75;SLC38A11;CSRNP3;RAPG…
Epithelial_cells	0	0	0	0	0	0	MXRA8;VWA1;PEX10;CLSTN1;TARDBP;AGTRAP;NPPA;DHRS3;FHAD1;DDI2;SZRD1;KIF17;USP48;TCEA3;TMEM50A;MACO1;SELENON;SFN;NUDC;SYTL1;TMEM200B;SERINC2;PTP4A2;HDAC1;KIAA1522;TMEM54;AK2;KIAA0319L;MRPS15;C1orf122;SF3A3;PPCS;PTPRF;AKR1A1;TSPAN1;FAAH;ATPAF1;EFCAB14;CMPK1;FOXD2;AL445183.2;SSBP3;OMA1;PGM1;AK4;SGIP1;ACADM;FUBP1;DDAH1;ODF2L;FNBP1L;F3;TMEM56;AGL;SLC35A3;RTCA;KCNA3;ATP5PB;TRIM33;SEC22B;AC239809.3;HIST2H…	SDF4;CCNL2;NADK;GNB1;RER1;CAMTA1;VAMP3;PARK7;RERE;LZIC;DFFA;CASZ1;KIAA2013;DHRS3;PRDM2;DDI2;SPEN;NECAP2;AKR7A2;NBL1;TMCO4;CAMK2N1;HP1BP3;EIF4G3;RAP1GAP;USP48;KDM1A;HNRNPR;TCEA3;ID3;PITHD1;HMGCL;PNRC2;NIPAL3;RCAN3;TMEM50A;ZNF593;SFN;NUDC;SYTL1;WASF2;STX12;RPA2;DNAJC8;YTHDF2;PUM1;SNRNP40;SERINC2;PTP4A2;KHDRBS1;KPNA6;MARCKSL1;ZBTB8OS;RBBP4;TMEM54;AK2;SFPQ;ZMYM4;KIAA0319L;MAP7D1;THRAP3;LSM10;MRPS15;D…	SDF4;MRPL20;SSU72;TNFRSF14;RPL22;CAMTA1;TNFRSF9;PARK7;ENO1;CASZ1;DHRS3;FHAD1;SPEN;AKR7A2;CAPZB;MINOS1;NBL1;DDOST;CDC42;HNRNPR;TCEA3;PITHD1;FUCA1;PNRC2;SRRM1;RSRP1;SH3BGRL3;HMGN2;ARID1A;NUDC;DNAJC8;PTP4A2;EIF3I;MARCKSL1;TMEM54;ZMYM4;KIAA0319L;MRPS15;C1orf122;NDUFS5;PPCS;YBX1;PTPRF;AKR1A1;UQCRH;OSBPL9;NRDC;RAB3B;ECHDC2;SCP2;TACSTD2;NFIA;PATJ;SRSF11;ADGRL4;LPAR3;SH3GLB1;PKN2;RPL5;FNBP1L;CNN3;TMEM56;…	PLEKHN1;MORN1;PLCH2;ARHGEF16;TP73;AL034417.3;AL034417.2;C1orf127;EPHA2;PLA2G5;C1QA;C1QC;C1QB;ELOA-AS1;AL445686.2;CNKSR1;CD52;TRNP1;THEMIS2;PTAFR;LAPTM5;NKAIN1;IQCC;FAM229A;TRIM62;GJB5;EDN2;C1orf210;ARTN;TTC39A-AS1;ZYG11A;LDLRAD1;TTC22;TMEM61;LINC01748;FOXD3-AS1;DIRAS3;LINC01725;SYDE2;AC118553.1;AMIGO1;CD53;DENND2C;MAB21L3;IGSF3;AC245595.1;FCGR1A;CTSS;CTSK;LYSMD1;S100A4;S100A14;AL162258.2;PAQR6;MN…	AL627309.3;AL109917.1;PLCH2;MMEL1;ARHGEF16;HES2;ESPN;FBXO2;TNFRSF1B;CLCNKA;ALPL;C1QA;C1QC;C1QB;AL109936.2;ASAP3;RUNX3;RHCE;CD164L2;FGR;THEMIS2;PTAFR;PTPRU;LAPTM5;NKAIN1;CSF3R;MANEAL;RHBDL2;AC093151.2;RIMKLA;ZMYND12;CDC20;ARTN;AL357079.1;AC104170.1;ZYG11A;AL606760.1;AC096536.1;FYB2;DAB1;LINC01748;AC099791.2;FOXD3-AS1;DNAJC6;WDR78;LRRC7;AL354872.2;SLC44A5;ST6GALNAC3;AK5;PTGFR;AL359504.2;MCOLN3;LRRC…	SSU72;FAAP20;RER1;PEX10;GPR153;CLSTN1;CTNNBIP1;LZIC;KIF1B;CASZ1;DHRS3;UBXN10-AS1;CDA;PINK1;DDOST;HP1BP3;ECE1;TCEA3;SRSF10;NIPAL3;SELENON;ZNF593;FGR;STX12;PTAFR;ATP5IF1;PHACTR4;EPB41;ZCCHC17;SERINC2;EIF3I;HDAC1;MARCKSL1;ZBTB8OS;KIAA1522;AC004865.2;TRAPPC3;MEAF6;PPCS;EBNA1BP2;ARMH1;EFCAB14;TAL1;CMPK1;EPS15;OSBPL9;NRDC;BTF3L4;ECHDC2;SSBP3;TACSTD2;MYSM1;NFIA;USP1;GADD45A;SRSF11;ACADM;MIGA1;ODF2L;PKN2…	PERM1;AGRN;AL390719.2;ATAD3C;TMEM52;MMEL1;MEGF6;TP73;HES2;PHF13;AL034417.2;SLC45A1;ENO1-AS1;MIR34AHG;TMEM201;CENPS;FBXO2;PDPN;TMEM51;AL121992.1;UQCRHL;SRARP;EPHA2;MFAP2;ARHGEF10L;PQLC2;PLA2G5;PINK1-AS;ALPL;WNT4;LINC01355;ZNF436;AL109936.2;ASAP3;IFNLR1;AL606491.1;MAN1C1;KDF1;TRNP1;CD164L2;FGR;PTPRU;NKAIN1;IQCC;TSSK3;ZBTB8B;AZIN2;OSCP1;CDCA8;EPHA10;AL139260.1;RHBDL2;EXO5;ERMAP;C1orf210;IPO13;ZSWIM5…	FAAP20;TNFRSF14;GPR153;SRM;AGTRAP;PLA2G2A;HP1BP3;TCEA3;ID3;PITHD1;PNRC2;SRSF10;NIPAL3;ARID1A;SFN;NUDC;SYTL1;HDAC1;MARCKSL1;KIAA1522;PSMB2;MRPS15;MEAF6;NDUFS5;MACF1;ZMPSTE24;PPCS;CDC20;PRDX1;FAAH;CMPK1;BTF3L4;SCP2;DHCR24;TM2D1;LEPROT;ACADM;USP33;FUBP1;PRKACB;SELENOF;LRRC8C;ZNF644;RPAP2;TMEM56;SARS;PSMA5;BCAS2;CSDE1;MAN1A2;PHGDH;NOTCH2;RBM8A;TXNIP;MRPS21;POGZ;CREB3L4;RAB13;C1orf43;ADAR;SLC50A1;DPM3…	LINC00115;GPR153;HES2;PEX14;PLA2G2A;ASAP3;GALE;NIPAL3;LDLRAP1;RPS6KA1;SFN;SYTL1;TMEM200B;SERINC2;KIAA1522;LINC01137;ZC3H12A;DNALI1;CCDC24;FAAH;CYP4B1;FOXD2;RAB3B;YIPF1;DHCR24;TACSTD2;AK4;CTH;SLC44A5;LPAR3;MCOLN2;AL078459.1;COL24A1;GBP5;LRRC8C;LRRC8D;SLC44A3;PALMD;RTCA;S1PR1;KIAA1324;RBM15;PIFO;KCND3;IGSF3;PHGDH;HMGCS2;AC239809.3;CTSK;TDRKH;RORC;S100A9;S100A4;S100A3;S100A2;S100A14;CREB3L4;ZBTB7B;M…	AL627309.1;AL645608.1;SAMD11;PERM1;AL645608.8;AGRN;ANKRD65;TMEM240;FNDC10;AL109917.1;TMEM52;MORN1;ARHGEF16;LINC01134;TNFRSF25;AL034417.2;AL096855.1;SLC2A5;MIR34AHG;LINC01759;PIK3CD-AS2;AL139423.1;C1orf167;NPPA-AS1;PLOD1;AC254633.1;PDPN;TMEM51-AS1;TMEM51;AL031283.2;AL121992.1;UQCRHL;SRARP;NBPF1;PADI2;ARHGEF10L;IGSF21;PQLC2;ALPL;RAP1GAP;WNT4;LINC01355;ZNF436-AS1;ASAP3;IFNLR1;NCMAP;RUNX3;PAQR7;CD52;…	PLEKHN1;ATAD3C;GABRD;ARHGEF16;MEGF6;HES2;AC254633.1;AL137802.2;PLA2G2A;PLA2G5;ASAP3;KDF1;SMPDL3B;TMEM200B;NKAIN1;FABP3;MANEAL;KCNQ4;RIMKLA;TMEM125;PDZK1IP1;STIL;FOXD2-AS1;FOXD2;TRABD2B;TTC39A;TTC39A-AS1;ZYG11A;AL606760.1;FYB2;DAB1;HOOK1;LINC01748;LRRC7;SLC44A5;PTGFR;LINC01725;SAMD13;DNASE2B;MCOLN2;LRRC8C;RTCA-AS1;VAV3;SYPL2;GSTM5;DENND2D;KCND3;LINC01750;ZNF697;HMGCS2;AC239799.2;CGN;TUFT1;OAZ3;TDR…
Fibroblasts	0	0	0	0	0	0	0	RERE;SPEN;CAMK2N1;HP1BP3;ID3;WASF2;KHDRBS1;RBBP4;GJA4;NRDC;JUN;JAK1;GNG12;GSTM3;AHCYL1;MCL1;TPM3;ADAR;LMNA;CCT3;PBX1;PRRC2C;CEP350;TROVE2;CSRP1;PPP1R12B;BTG2;MDM4;IRF2BP2;CEP170;RHOB;LBH;SRSF7;SPTBN1;KLHL23;MAP3K20;NFE2L2;STAT1;IGFBP2;ITM2C;TGFBR2;NKTR;CACNA1D;ARL6IP5;CRYBG3;FILIP1L;ZBTB20;PARP14;MBNL1;DHX36;TIPARP;SEC62;PHC3;HES1;MUC20-OT1;SRP72;IGFBP7;SEPT11;CCNI;SMARCA5;ARHGAP10;PALLD;IL6ST;ME…	NBL1;LMO4;CNN3;S100A11;PRRC2C;GLUL;NUCKS1;LAPTM4A;SPTBN1;ATP5MC3;IGFBP5;SEPT11;MEF2C;CAST;DEK;HLA-DRB1;DST;EPB41L2;SEPT7;TIMP1;DLC1;TLN1;GSN;CD81;MTRNR2L8;SERPING1;COX8A;ATP5MG;PFDN5;RPS26;PPP1R12A;TBX3;COX6A1;RPL36AL;ZFP36L1;CALM1;DDX24;THBS1;MORF4L1;MT2A;COX4I1;YWHAE;CCL2;CCL3;IGFBP4;ACTG1;MYL9;CIRBP;NFIC;EIF3G;TRIR;TPM4;KLF2;BST2;GDF15;NOP53;TTTY15;SELENOM;ATP5PF;COL6A1	PLCH2;HES5;KCNAB2;RPL22;ENO1;NPPA;DHRS3;RCC2;C1QB;RPL11;TMEM50A;SH3BGRL3;IFI6;TMEM200B;PTP4A2;AK2;MRPS15;RRAGC;PABPC4;HEYL;CAP1;YBX1;AL139289.2;ATP6V0B;RPS8;PLK3;PRDX1;AKR1A1;KANK4;CACHD1;NEGR1;TNNI3K;NEXN;IFI44L;ADGRL2;GNG5;CYR61;TGFBR3;SORT1;GSTM5;KCNA3;SEC22B;S100A10;S100A11;S100A6;S100A4;TPM3;LAMTOR2;BGLAP;PEAR1;MNDA;IFI16;DUSP23;CD48;FCGR2A;RGS5;XCL2;PRRX1;SOAT1;IER5;GLUL;ARPC5;RGS2;PTPRC;AR…	ISG15;MMP23B;CFAP74;RPL22;AL034417.4;ENO1;MFAP2;RCC2;CAMK2N1;C1QB;RPL11;TMEM50A;SH3BGRL3;LINC01715;PTPRU;PTP4A2;AK2;TRIM62;CAP1;PPT1;YBX1;RPS8;PLK3;AKR1A1;FOXD2;ZFYVE9;ROR1;CACHD1;SGIP1;TGFBR3;RPL5;AC105942.1;GSTM5;SEC22B;ANKRD35;PLEKHO1;ECM1;MCL1;SCNM1;SELENBP1;S100A10;S100A11;S100A6;S100A4;RPS27;TPM3;LAMTOR2;PEAR1;ETV3;KIRREL1;MNDA;IFI16;DUSP23;PEA15;CD48;ARHGAP30;FCGR2A;RGS5;SFT2D2;DNM3;RABGAP…	PLK3;GADD45A;CNN3;TXNIP;S100A4;MNDA;GLUL;PTGS2;PTPRC;CD55;G0S2;ROCK2;REL;COBLL1;HSPE1;FN1;IGFBP2;IGFBP5;ANKRD28;CACNA1D;SELENOK;FILIP1L;NFKBIZ;CCDC80;GATA2;MUC20-OT1;SPON2;IGFBP7;SCARB2;SPARCL1;SYNPO2;GUCY1A1;CDC42SE2;CARMN;SPARC;SERPINB1;CD83;SOX4;HIST1H4C;AIF1;HSPA1B;SENP6;HSPB1;ZKSCAN1;SAT1;BEX3;TCEAL4;BGN;PDLIM2;CLU;PRKDC;NDUFB9;PLIN2;TPM2;KLF9;ANXA1;C9orf3;NR4A3;GSN;STOM;IER5L;CD44;C11orf96;…	KLHL17;C1orf159;ANKRD65;CFAP74;PHF13;PIK3CD-AS2;PDPN;KAZN;TMEM51;MFAP2;ARHGEF10L;CAMK2N1;LINC01715;SDC3;TINAGL1;TMEM54;TRIM62;OSCP1;FOXD2;PLPP3;DOCK7;CACHD1;RAVER2;WLS;PTGER3;NEXN;ADGRL2;TTLL7;LPAR3;SYDE2;CYR61;AC105942.1;TMEM56;WNT2B;PTGFRN;ANKRD35;LIX1L-AS1;C1orf54;CTSK;SELENBP1;PEX19;CD48;RGS5;AL021068.1;RASAL2;GLUL;RGL1;PLA2G4A;PTPRC;PHLDA3;CSRP1;SHISA4;ZBED6;ETNK2;LAMB3;SERTAD4-AS1;FAM71A;BA…	SRSF10;MACF1;PRDX1;CSDE1;TXNIP;PTPRC;RHOB;SPTBN1;IGKC;IGFBP5;EDEM1;GOLGA4;NKTR;ZBTB20;CNBP;SOD3;SEC31A;EGR1;IER3;LTB;HLA-DRA;HLA-DRB1;HLA-DPB1;PNISR;UTRN;AKAP12;SYNE1;GTF2I;KMT2E;RARRES2;TIMP1;ATRX;GSN;PHPT1;LRRC26;IFITM2;LSP1;CYB561A3;AHNAK;UNC93B1;MSMB;DDIT4;ACTA2;CD4;TPI1;YBX3;TUBA1A;CD63;TESC;COL4A1;KTN1;PPP2R5C;IGHG1;MORF4L1;FUS;BPTF;TIMP2;GADD45B;NFIC;IER2;MT-ND4L	ISG15;FHAD1;LPAR3;RBM15;CTSK;S100A6;S100A4;PBXIP1;RGS5;GLUL;ZBED6;G0S2;LIN9;TFB2M;CAD;LTBP1;USP34;LRRTM1;TMEFF2;COLQ;IMPDH2;PCNP;C3orf80;BCHE;DNAJC19;SPARCL1;CCL28;CD14;PCDHB6;HLA-A;AL133338.1;CARD11;REPS2;CPQ;TSNARE1;UNC13B;KLF4;C9orf78;IFITM3;CDKN1C;CAVIN3;CD44;SYT7;ARL2;MALAT1;AP002807.1;MASTL;CPEB3;HNRNPA1;RPS26;SLC26A10;CTDSP2;PPM1H;DTX1;MLEC;ITGBL1;RPS29;LINC01588;PLEKHH1;AL137779.1;PIF1;AC…	PHF13;PIK3CD-AS2;PLOD1;KAZN;FHAD1;MFAP2;ALDH4A1;CAMK2N1;HSPG2;CLIC4;LINC01715;PTPRU;SDC3;COL8A2;OSCP1;FHL3;BMP8B;RIMKLA;AL139289.2;LURAP1;FOXD2;PLPP3;CACHD1;LRRIQ3;TTLL7;AC092807.3;ODF2L;BCAR3;AC105942.1;TMEM56;SORT1;OLFML3;VANGL1;PTGFRN;TENT5C;ZNF697;NUDT4B;MTMR11;C1orf54;ECM1;CTSK;SELENBP1;S100A10;S100A4;RPS27;PBXIP1;BGLAP;PEAR1;MNDA;CD48;ADAMTS4;FCGR2A;AL359541.1;DDR2;RGS5;ILDR2;GPR161;DNM3;DN…	ANKRD65;RPL22;AL034417.4;FHAD1;TINAGL1;GJA4;GRIK3;OXCT2;YBX1;RPS8;GLIS1;JUN;PTGER3;RPL5;AC093157.1;SORT1;ZNF697;S100A6;S100A4;RPS27;PBXIP1;BGLAP;ARHGAP30;XCL2;AL021068.1;GLUL;ZBED6;IKBKE;HSD11B1;FAM71A;PLD5;RPS7;CAD;LTBP1;CALM2;RPS27A;USP34;LGALSL;LINC01873;LINC01798;AC015971.1;NPAS2;CD8B2;AC017002.3;CCDC74B;PLA2R1;FRZB;RPL37A;AP1S3;PTMA;FANCD2;RPL32;RPL14;IMPDH2;AMT;ACY1;HTD2;FAM107A;ROBO2;PCNP;…
Hepatocytes	0	0	0	0	0	0	0	0	RERE;KHDRBS1;USP33;MCL1;GLUL;RGS1;RGS2;BTG2;GCC2;DBI;CACNA1D;TM4SF1;IGFBP7;AMACR;HNRNPH1;HLA-DRA;HLA-DRB1;PNISR;AHI1;AZGP1;KCNQ1OT1;MALAT1;MSMB;SLC2A3;A2M;MGP;KCNC2;NFKBIA;FUS;MT1G;TCF4;ID1;KLF2;FOSB;DDX17	SDF4;CCNL2;NADK;GNB1;AL109917.1;RER1;RPL22;CAMTA1;VAMP3;RERE;ENO1;LZIC;KIAA2013;DHRS3;SPEN;NECAP2;RCC2;CAPZB;HP1BP3;EIF4G3;CDC42;HNRNPR;ID3;RPL11;PITHD1;PNRC2;SRRM1;RSRP1;TMEM50A;SH3BGRL3;CD52;HMGN2;NUDC;WASF2;IFI6;STX12;RPA2;DNAJC8;SERINC2;PTP4A2;KHDRBS1;RBBP4;AK2;SFPQ;MAP7D1;LSM10;MACF1;CAP1;RLF;SMAP2;PPCS;YBX1;ELOVL1;ATP6V0B;RPS8;PRDX1;AKR1A1;NASP;GPBP1L1;UQCRH;OSBPL9;NRDC;TUT4;MAGOH;JUN;JAK1;…	SDF4;NADK;GNB1;RER1;RPL22;CAMTA1;VAMP3;RERE;ENO1;RBP7;SPEN;NECAP2;RCC2;CAPZB;HP1BP3;EIF4G3;CDC42;HNRNPR;ASAP3;ID3;RPL11;PNRC2;SRRM1;RSRP1;TMEM50A;SH3BGRL3;CD52;HMGN2;WASF2;STX12;DNAJC8;PTP4A2;KHDRBS1;RBBP4;AK2;SFPQ;MAP7D1;LSM10;MACF1;CAP1;RLF;SMAP2;YBX1;ATP6V0B;CCDC24;RPS8;PRDX1;AKR1A1;NASP;GPBP1L1;UQCRH;NRDC;TUT4;MAGOH;FYB2;JUN;JAK1;SERBP1;SRSF11;USP33;FUBP1;PRKACB;GNG5;PKN2;ZNF644;RPL5;TMED5;DN…	EIF4G3;RPL11;PNRC2;SH3BGRL3;CD52;KHDRBS1;SMAP2;PRDX1;NASP;GTF2B;CAPZA1;MCL1;CTSS;C1orf56;S100A6;S100A4;RPS27;TPM3;LMNA;PRRC2C;GLUL;IVNS1ABP;RGS1;RGS2;PTPRC;PTPN7;BTG2;CD55;IRF2BP2;SRSF7;SPTBN1;RPS27A;RAB1A;TMSB10;CAPG;NR4A2;NFE2L2;NOP58;EEF1B2;ITM2C;PTMA;LRRFIP1;RPL32;RPL15;CSRNP1;EIF1B;CTNNB1;GNAI2;SELENOK;ARL6IP5;GATA2;ATP1B3;DHX36;TIPARP;RPL22L1;BMP2K;RASGEF1B;H2AFZ;RPL34;PRMT9;DNAJC21;RPS23;C…	TCEA3;ASAP3;RPL11;SH3BGRL3;CD52;DNAJC8;KHDRBS1;TUT4;JUN;JAK1;TMEM56;PIFO;CAPZA1;PTPN22;MCL1;C1orf56;S100A6;S100A4;RPS27;TPM3;LMNA;CD247;XCL1;PRRC2C;GLUL;IVNS1ABP;RGS1;RGS2;C1orf53;PTPRC;PTPN7;BTG2;MDM4;H3F3A;RPS7;ID2;YPEL5;SRSF7;ZFP36L2;RPS27A;TMSB10;CCDC74A;NR4A2;PLA2R1;NFE2L2;ORMDL1;BZW1;EEF1B2;SP100;ITM2C;PTMA;GPC1;RPL32;RPL15;CSRNP1;RPSA;EIF1B;RPL14;CTNNB1;NKTR;GNAI2;NEK4;SELENOK;ARL6IP5;GATA…	DNAJC8;S100A4;FCER1G;RGS1;RGS2;BTG2;IRF2BP2;TMSB10;IGKC;NFE2L2;SP100;ITM2C;PTMA;EDEM1;TGFBR2;GNAI2;SEC62;RPL22L1;CCDC50;MEF2C;H2AFY;CXXC5;CD74;HNRNPH1;RNF130;SOX4;HIST1H1D;TUBB;HLA-DRA;HLA-DRB1;HLA-DQA1;HLA-DPB1;SNX3;CYCS;ELMO1;TMSB4X;PLP2;NDUFA1;BCAP31;CTSB;IRF7;CAT;MALAT1;CDK2AP2;HNRNPF;MSMB;KDM5A;RPL6;GPR183;PNN;MIS18BP1;NPC2;CYBA;TRAPPC1;TRAF4;GRN;ZNF652;SYNGR2;TCF4;RRBP1;BST2;USF2;TYROBP;SPI…	SDF4;CCNL2;RPL22;CAMTA1;VAMP3;RERE;LZIC;SPEN;NBL1;PLA2G2A;CAMK2N1;HP1BP3;EIF4G3;HNRNPR;ID3;RPL11;PNRC2;WASF2;DNAJC8;KHDRBS1;RBBP4;GJA4;YBX1;HYI;RPS8;PRDX1;AKR1A1;NASP;UQCRH;OSBPL9;NRDC;TUT4;C1orf123;MAGOH;JUN;NFIA;JAK1;SERBP1;GNG12;WLS;USP33;FUBP1;ADGRL2;PKN2;ZNF644;RPL5;ARHGAP29;CNN3;GNAI3;GSTM3;AHCYL1;MAN1A2;TXNIP;MCL1;PSMB4;S100A6;S100A4;RAB13;RPS27;TPM3;ADAR;DPM3;KRTCAP2;LMNA;CCT3;PBX1;TMCO1;…	FNDC10;AL109917.1;RBP7;RPL11;PNRC2;SH3BGRL3;CD52;DNAJC8;KHDRBS1;SMAP2;RPS8;NASP;TUT4;COA7;JUN;JAK1;DDAH1;RPL5;TMEM56;CAPZA1;PTPN22;TENT5C;TXNIP;MCL1;S100A6;S100A4;RPS27;TPM3;ADAR;KRTCAP2;CCT3;KLHDC9;CD247;XCL1;PRRC2C;NCF2;IVNS1ABP;RGS1;RGS2;PTPRC;PTPN7;BTG2;MDM4;MARC2;MARC1;H3F3A;AGT;IRF2BP2;ARID4B;RPS7;ID2;AC092164.1;YPEL5;LBH;SRSF7;KCNG3;ZFP36L2;RPS27A;LGALSL;AAK1;TMSB10;MGAT4A;RPL31;GCC2;CCDC7…	SDF4;RPL22;CAMTA1;VAMP3;RERE;SPEN;CAMK2N1;HP1BP3;EIF4G3;CDC42;HNRNPR;ASAP3;ID3;RPL11;PNRC2;SRRM1;NUDC;WASF2;STX12;DNAJC8;KHDRBS1;KPNA6;RBBP4;GJA4;MACF1;YBX1;HYI;RPS8;PRDX1;NASP;UQCRH;OSBPL9;NRDC;TUT4;C1orf123;MAGOH;JUN;NFIA;JAK1;SERBP1;GNG12;TYW3;PKN2;ZNF644;RPL5;DNTTIP2;ARHGAP29;CNN3;GNAI3;GSTM3;AHCYL1;MAN1A2;TXNIP;MCL1;S100A6;S100A4;RAB13;RPS27;TPM3;ADAR;DPM3;KRTCAP2;LMNA;CCT3;PFDN2;PBX1;MGST3;…
HSC_CD34+	0	0	0	0	0	0	0	0	0	MRPL20;TNFRSF14;ENO1;DHRS3;CAPZB;MINOS1;CDC42;C1QA;C1QC;C1QB;RPL11;FUCA1;PNRC2;RSRP1;SH3BGRL3;CD52;HMGN2;DNAJC8;LAPTM5;PTP4A2;EIF3I;NDUFS5;CAP1;PPT1;SMAP2;YBX1;RPS8;AKR1A1;UQCRH;JUN;SERBP1;SH3GLB1;LMO4;AHCYL1;CAPZA1;CSDE1;ATP1A1;AC245014.3;TXNIP;PLEKHO1;MRPS21;MCL1;S100A10;S100A11;S100A6;S100A4;RPS27;TPM3;ADAR;SSR2;LAMTOR2;ACKR1;COPA;CD84;TSTD1;FCER1G;SDHC;FCGR2A;MGST3;SELE;PRRC2C;PRDX6;IER5;GLUL…	MRPL20;RPL22;ENO1;CAPZB;MINOS1;CDC42;C1QA;C1QC;C1QB;RPL11;PNRC2;RUNX3;RSRP1;SH3BGRL3;CD52;HMGN2;DNAJC8;LAPTM5;PTP4A2;EIF3I;CAP1;PPT1;SMAP2;YBX1;RPS8;UQCRH;JUN;LMO4;RPL5;CD53;CAPZA1;MAGI3;CSDE1;ATP1A1;AC245014.3;TXNIP;PLEKHO1;MRPS21;MCL1;S100A10;S100A11;S100A6;S100A4;RPS27;TPM3;LAMTOR2;PFDN2;FCER1G;FCGR2A;MGST3;SELP;PRRC2C;PRDX6;IER5;LINC01686;PTGS2;RGS1;RGS2;PTPRC;NUCKS1;CD55;G0S2;H3F3A;KCNK1;IRF…	RPL11;SH3BGRL3;LAPTM5;RPS8;LMO4;F3;S100A11;S100A6;S100A4;RPS27;PTGS2;CD55;G0S2;RPS7;LAPTM4A;FOSL2;REL;SF3B1;EEF1B2;RPL37A;LRRFIP1;RPL32;RPL15;RPSA;RPL14;CTNNB1;RPL29;CPA3;SERP1;KIT;AREG;HPGDS;RPL34;RPS3A;SUB1;RPL37;CAST;RPS14;DUSP1;CLIC1;RPS18;VEGFA;HSP90AB1;EEF1A1;RPS12;TNFAIP3;NAMPT;PNPLA8;TMSB4X;SAT1;RPS4X;ACSL4;RPL10;RPL7;RPL8;PLIN2;ANXA1;RPL12;RPLP2;CTSD;MS4A2;FTH1;SF1;MALAT1;RPS3;BIRC3;ATP5…	C1QB;RPL11;RUNX3;RSRP1;SH3BGRL3;CD52;TMEM54;AGO4;RPS8;HECTD3;COA7;ACOT11;LPAR3;TMEM56;S100A11;S100A4;RPS27;SELP;PRRC2C;RASAL2;LAMC1;PTPRC;EPHX1;EGLN1;MAP3K21;KCNK1;RPS7;ASAP2;OST4;FOSL2;ZFP36L2;CLHC1;SPRED2;TMSB10;SEPT10;LIMS2;NOSTRIN;DLX1;TMEFF2;UNC80;RPL37A;ARL4C;ANO7;RPL32;SH3BP5-AS1;RPSA;RPL14;ZNF197;CCR1;HYAL2;RPL29;CADPS;LINC00877;ITGB5;SLC12A8;MBNL1;LINC01094;WDFY3;SPP1;ABCG2;ARHGEF38;RPL3…	RPS8;S100A4;RPS27;OST4;RPL37A;RPS3A;RPL37;CD74;HLA-DRA;HLA-DPB1;EEF1A1;PNISR;RPS4X;SSR4;RPL10;IRF7;ATP5MG;MSMB;CD69;RPS26;HSP90B1;COMMD6;COX4I1;RPL26;RPL23A;GRN;LIMD2;ATP5F1E;RPS28;KLF2;RPL18A;RPL3;MT-ND4L	MINOS1;NBL1;ID3;RPL11;HMGN2;DNAJC8;YBX1;RPS8;UQCRH;JUN;NFIA;CYR61;LMO4;CNN3;TXNIP;MRPS21;S100A11;S100A6;S100A4;RPS27;MGST3;SELP;PRRC2C;PRDX6;RGS1;CSRP1;NUCKS1;H3F3A;RPS7;PDIA6;ROCK2;LAPTM4A;OST4;PPP1CB;EPAS1;SPTBN1;RTN4;RPS27A;TMSB10;MAT2A;COX5B;RPL31;MZT2B;ZEB2;ATP5MC3;HNRNPA3;MYO1B;TMEFF2;AC114760.2;SF3B1;EEF1B2;RPL37A;IGFBP5;PTMA;RPL32;RPL15;GOLGA4;RPSA;EIF1B;RPL14;CTNNB1;MAP4;RPL29;SPCS1;CADP…	FHAD1;HSPG2;C1QB;RPL11;RUNX3;RSRP1;SH3BGRL3;CD52;LAPTM5;RPS8;COA7;ACOT11;JUN;LINC01748;ADGRL4;TMEM56;HIST2H4A;AC239868.2;S100A10;S100A11;S100A4;RPS27;FCGR2A;SELP;SELE;PRRC2C;RASAL2;LINC01686;PTGS2;PTPRC;SOX13;IRF6;EPHX1;ITPKB-AS1;CDC42BPA;KCNK1;RPS7;ASAP2;RN7SL832P;OST4;PPP1CB;SRSF7;KCNG3;ZFP36L2;CLHC1;MEIS1;CNRIP1;AAK1;TMSB10;TCF7L1;RPL31;SEPT10;NPHP1;POTEI;POTEE;TANC1;DLX1;TMEFF2;SF3B1;NRP2;EEF…	MRPL20;MINOS1;C1QA;C1QB;ID3;RPL11;HMGN2;NUDC;DNAJC8;NDUFS5;YBX1;RPS8;UQCRH;JUN;LINC01748;NFIA;CYR61;LMO4;RPL5;CNN3;CD53;TXNIP;MRPS21;S100A11;S100A6;S100A4;RPS27;ACKR1;CD84;MGST3;PRRC2C;PRDX6;FAM129A;CSRP1;LAX1;NUCKS1;IRF6;H3F3A;MAP3K21;CHRM3;COX20;RPS7;ROCK2;LAPTM4A;OST4;PPP1CB;LBH;EPAS1;CALM2;RTN4;RPS27A;PLEK;CCT7;MAT2A;COX5B;RPL31;MZT2B;ZEB2;ATP5MC3;HNRNPA3;MYO1B;AC114760.2;SF3B1;EEF1B2;UNC80;R…
Macrophage	0	0	0	0	0	0	0	0	0	0	PDPN;PLA2G2D;SLC30A2;KIF2C;DAB1;DEPDC1;DNASE2B;ECM1;CTSK;CD1C;CD1E;FCER1A;SLAMF9;CD247;LAMC1;SLC41A1;RNF144A;CD207;IGKC;IL1RL2;SULT1C2;LINC01857;AC009974.1;CFAP65;C2orf72;SPATA12;RBP1;PLS1;CP;TM4SF19;LINC00504;PLAC8;ABCG2;SMIM31;HPGD;AMACR;RAI14;GHR;CRHBP;ZBED3-AS1;ADAM19;HMMR;ANKRD66;AL078590.2;AL078604.2;THSD7A;AGR3;GSDME;WIPF3;AC004988.1;KIAA1324L;CFP;PCSK1N;CCDC160;HTRA4;IL7;DPYS;DCSTAMP;RORB…	ISG15;AL645608.9;RER1;KCNAB2;TNFRSF1B;DHRS3;NECAP2;PAQR7;KDF1;IFI6;STX12;MARCKSL1;ZBTB8B;TRAPPC3;PABPC4;AL512353.1;EFCAB14;NRDC;PLPP3;PKN2;F3;AC118553.2;SLC25A24;SORT1;GNAI3;DRAM2;CD160;TXNIP;SV2A;PLEKHO1;CTSS;PSMB4;S100A10;RAB13;LAMTOR2;CCT3;IFI16;AL139011.1;CD84;MGST3;TMCO1;CD247;CREG1;MPC2;FAM129A;AL136987.1;B3GALT2;ARL8A;LAX1;AL512306.3;NFASC;RHEX;NENF;EPRS;RAB4A;PGBD5;CEP170;PPM1G;EIF2AK2;ZF…	FAM213B;MMEL1;HES2;SPSB1;PDPN;TMEM51;NBPF1;PADI2;ARHGEF10L;CDA;C1QA;C1QC;C1QB;SDC3;LCK;PHC2;SH3D21;CSF3R;RRAGC;AL139260.1;MFSD2A;EXO5;IPO13;B4GALT2;PDZK1IP1;COA7;PLPP3;FGGY;ATG4C;HS2ST1;LRRC8C;GFI1;BCAR3;FRRS1;SORT1;SLC22A15;SRGAP2B;FMO5;C1orf54;CTSS;S100A8;IL6R;MUC1;MNDA;PYHIN1;AIM2;SLAMF8;TOMM40L;FCRLB;AL031733.2;XCL2;XCL1;SLC19A2;AL021068.1;TOR3A;NPL;RGL1;PLA2G4A;UBE2T;FAM72A;SRGAP2;IL10;CR1;L…	TNFRSF14;CDC42;C1QB;SRSF10;PAQR7;PSMB2;MACF1;PABPC4;PPT1;PRDX1;CMPK1;SCP2;LEPROT;SARS;PSMA5;RAP1A;CSDE1;CD160;TXNIP;MRPS21;TDRKH;C1orf43;ADAR;MNDA;IFI16;CD48;TMCO1;CREG1;CACYBP;IER5;GLUL;IVNS1ABP;RGS1;PPP1R15B;G0S2;NENF;MIA3;DEGS1;RNF187;ACP1;RHOB;HADHB;RHOQ;CHAC2;ACTR2;ANXA4;NAGK;MTHFD2;TGOLN2;MAT2A;RNF181;GNLY;CD8A;IGKC;IGKV3-20;DUSP2;COX5B;MGAT4A;EIF5B;LIMS1;RANBP2;IL1B;GYPC;FMNL2;NR4A2;ERMN;T…	KCNAB2;TNFRSF1B;HSPB7;PADI2;PLA2G2A;C1QA;C1QC;C1QB;EPHB2;GALE;PAQR7;RPS6KA1;SYTL1;THEMIS2;TMEM200B;SERINC2;TINAGL1;KIAA1522;FNDC5;CLSPN;CSF3R;ZC3H12A;RAB3B;TACSTD2;CACHD1;NEXN;ADGRL2;CYR61;GBP5;LRRC8D;PLPPR4;SLC16A4;DENND2D;C1orf162;SLC22A15;SV2A;CTSS;SEMA6C;TNFAIP8L2;S100A9;S100A8;S100A3;DENND4B;VANGL2;CD48;SLAMF7;FCER1G;FCGR2A;FCGR3A;RGS5;PRRX1;DARS2;SOAT1;NPL;NCF2;RGS1;MIR181A1HG;CHIT1;RAB7B;R…	PERM1;AL645608.8;FNDC10;GPR153;HES2;MIR34AHG;RBP7;PLOD1;TMEM51;FHAD1;SLC25A34;PADI2;ALDH4A1;CDA;C1QA;C1QC;C1QB;LINC01355;ZNF683;FGR;SDC3;LCK;RNF19B;ZSCAN20;COL8A2;SH3D21;AL591845.1;CDCA8;MYCL;RIMKLA;TMEM53;LURAP1;PDZK1IP1;SPATA6;COA7;ACOT11;PARS2;CYP2J2;SAMD13;MCOLN3;GFI1;EVI5;BCAR3;FRRS1;RTCA-AS1;CELSR2;ADORA3;DCLRE1B;VANGL1;CD2;PTGFRN;ZNF697;FCGR1B;AC246785.3;NBPF10;AC243772.2;C1orf54;ECM1;CTSS…	TNFRSF14-AS1;MMEL1;KCNAB2;ACOT7;PADI2;CDA;C1QA;C1QC;C1QB;CD52;FGR;RAB42;TMEM200B;LAPTM5;TINAGL1;CLSPN;COL8A2;MANEAL;KCNQ4;SLC2A1;ARTN;PDZK1IP1;FOXD2;ROR1;NEXN;ADGRL2;DNASE2B;CYR61;GBP5;TGFBR3;CCDC18;VAV3;GSTM5;CD53;DENND2D;C1orf162;TMIGD3;FAM19A3;SLC22A15;ANKRD35;FCGR1A;SV2A;CTSS;AL391069.3;TCHH;S100A9;S100A3;PEAR1;MNDA;CD48;F11R;ARHGAP30;FCER1G;FCGR2A;FCGR3A;FCRLB;RGS5;CCDC181;SLC19A2;AL021068.1…
Monocyte	0	0	0	0	0	0	0	0	0	0	0	TNFRSF18;RER1;TNFRSF1B;UBXN10-AS1;RUNX3;TRIM63;MARCKSL1;ZBTB8B;RHBDL2;NRDC;PKN2;GFI1;GNAI3;DRAM2;TXNIP;PLEKHO1;CTSS;PSMB4;LAMTOR2;IFI16;AL139011.1;HSPA6;TMCO1;CREG1;AL353708.3;FAM129A;AL136987.1;TRAF3IP3;LPGAT1;NENF;EPRS;PGBD5;EDARADD;CEP170;PPM1G;CCDC121;EIF2AK2;ZFP36L2;RHOQ;CCT4;ACTR2;MOB1A;AUP1;POLE4;AC015971.1;MGAT4A;SLC20A1;MZT2A;KYNU;CYTIP;BAZ2B;TTC30A;SLC40A1;GLS;SLC39A10;HSPD1;HSPE1;CFLAR…	TNFRSF18;TMEM51;PADI2;ARHGEF10L;CDA;C1QA;C1QC;C1QB;MAN1C1;RAB42;TINAGL1;AZIN2;EXO5;ERMAP;NEXN;SPATA1;LRRC8B;SNX7;ADORA3;OLFML3;CD101;NBPF26;CD160;FMO5;MTMR11;C1orf54;CTSS;MINDY1;S100A9;S100A8;IL6R;ARHGEF11;MNDA;SLAMF8;TOMM40L;FCGR2A;SH2D1B;RGS5;TADA1;XCL1;AL021068.1;FASLG;AL121983.1;RASAL2;NPL;PLA2G4A;FAM72A;SRGAP2;AL591846.2;IL10;PFKFB2;G0S2;CCSAP;DISC1;KMO;FAM49A;PLB1;RASGRP3;CYP1B1-AS1;BCL11A;…	GPR153;C1QB;SRSF10;RUNX3;MACF1;PPT1;KIF2C;PRDX1;SCP2;PSMA5;RAP1A;CSDE1;TXNIP;MRPS21;S100A8;ADAR;MNDA;IFI16;PEA15;CD48;PFDN2;TMCO1;CREG1;CACYBP;IER5;GLUL;COLGALT2;IVNS1ABP;RGS1;PPP1R15B;CD55;G0S2;ESRRG;DEGS1;LYST;RHOB;MRPL33;RHOQ;ACTR2;NAGK;TGOLN2;MAT2A;RNF181;IGKC;IGKV3-20;DUSP2;COX5B;MGAT4A;EIF5B;LIMS1;RANBP2;IL1B;MYO7B;ZEB2;NR4A2;BAZ2B;CD302;TANK;GCA;PPIG;METAP1D;SLC39A10;SF3B1;ARL8B;LSM3;OSBPL…	LINC00115;GPR153;TNFRSF1B;HSPB7;PADI2;PLA2G2A;CAMK2N1;C1QA;C1QC;RPS6KA1;SYTL1;THEMIS2;RNF19B;CSF3R;ZC3H12A;SMAP2;FOXD2;ZFYVE9;TACSTD2;ROR1;MCOLN2;COL24A1;GBP5;LRRC8D;AC105942.1;GSTM5;SLC16A4;C1orf162;KCND3;CD101;PLEKHO1;ECM1;CTSS;CTSK;TNFAIP8L2;LYSMD1;SELENBP1;S100A9;S100A8;DENND4B;IL6R;KIRREL1;FCER1A;CD48;SLAMF7;ARHGAP30;FCER1G;FCGR2A;FCGR3A;RGS5;KIAA1614;NCF2;COLGALT2;IVNS1ABP;RGS1;RGS13;MIR181…	AL645608.8;ANKRD65;FNDC10;NPHP4;ENO1-AS1;MIR34AHG;RBP7;PLOD1;TNFRSF8;TMEM51;FHAD1;PADI4;IGSF21;EPHB2;ZNF436-AS1;TRNP1;SMPDL3B;SDC3;FABP3;AL136115.2;RNF19B;SH3D21;AL591845.1;CDCA8;FHL3;MYCL;COL9A2;ERMAP;STIL;SPATA6;BEND5;ELAVL4;ACOT11;PLPP3;SAMD13;BCAR3;TMEM56;FRRS1;AL390036.1;PSRC1;SORT1;TMIGD3;AL390729.1;SLC22A15;ZNF697;HMGCS2;FCGR1B;NBPF10;NBPF9;FCGR1A;MTMR11;CTSS;MINDY1;S100A9;S100A8;MUC1;ARHG…	KCNAB2;TNFRSF1B;PADI2;CDA;C1QA;C1QC;C1QB;LAPTM5;DLGAP3;CLSPN;DNALI1;ARTN;ARMH1;FOXD2;SHISAL2A;WDR78;NEXN;MCOLN2;GBP3;TGFBR3;CCDC18;CNN3;AC105942.1;VAV3;FAM102B;HENMT1;DENND2D;C1orf162;CD101;NBPF10;FCGR1A;ADAMTSL4;CTSS;TNFAIP8L2;LYSMD1;AL391069.2;SELENBP1;TCHH;S100A9;S100A8;HAPLN2;PEAR1;MNDA;CD84;CD48;SLAMF7;LY9;F11R;ARHGAP30;FCER1G;FCGR2A;FCGR3A;RGS5;SELL;NPL;IVNS1ABP;PTGS2;RGS1;RGS2;ASPM;C1orf53…
Neutrophils	0	0	0	0	0	0	0	0	0	0	0	0	AL645608.9;RBP7;CDA;ZBTB8B;AC114490.2;CSF3R;AL512353.1;AL592166.1;MMACHC;ACOT11;L1TD1;PTGER3;FMO5;SELENBP1;S100A9;S100A8;MNDA;LINC01133;AL139011.1;TOMM40L;CD247;RASAL2;NCF2;PLA2G4A;G0S2;CCSAP;ZNF670;ZNF496;CCDC121;ZFP36L2;AC017083.1;DYSF;AC015971.1;IL1R2;FHL2;IL1B;IL1RN;CYTIP;FAM171B;HSPE1;PLCL1;AC064836.3;MAP2;KANSL1L;SLC11A1;SPEG;ARL4C;IRAK2;TSEN2;MOBP;ZNF852;ABHD6;FHIT;CADPS;LINC00877;STX19;FI…	PRDX1;S100A8;GLUL;PPP1R15B;RHEX;CD55;G0S2;BCL11A;DUSP2;RANBP2;SLC20A1;IL1B;NR4A2;SF3B1;ARL4C;EDEM1;ANKRD28;CTNNB1;GATA2;CCDC50;CXCL2;AREG;NFKB1;IL13;NR3C1;CD74;LTC4S;CD83;SOX4;HIST1H4C;HIST1H1D;IER3;HLA-DRB1;HLA-DQA1;HLA-DPA1;HLA-DPB1;TNFAIP3;TSPAN13;KMT2E;PNPLA8;ACSL4;ANXA1;MS4A6A;AHNAK;MALAT1;UNC93B1;BIRC3;ARL5B;MAP3K8;MSMB;CD69;TUBA1A;NR4A1;INTS6;GPR183;NFKBIA;SNAPC1;LEO1;BCL2A1;FUS;CCL4;VMP1;…	ISG15;RER1;ECE1;SYTL1;THEMIS2;KIAA1522;CSF3R;PLPP3;NFIA;PKN2;CNN3;C1orf162;PTPN22;TXNIP;ECM1;CTSS;PSMB4;S100A9;S100A8;RAB13;ASH1L-AS1;NTRK1;FCER1A;CD48;FCER1G;TMCO1;RGS16;FAM129A;PTGS2;RGS1;RGS13;PPP1R12B;SLC45A3;NUCKS1;RASSF5;CD55;NENF;EDARADD;NLRP3;YWHAQ;ROCK2;RHOB;ADCY3;LTBP1;EIF2AK2;RHOQ;CALM2;UGP2;ARHGAP25;SUCLG1;IL18R1;FHL2;IL1B;IL1RN;PSD4;GYPC;TNFAIP6;COBLL1;AC114760.2;HSPE1;FN1;IGFBP2;IGF…	GPR153;RBP7;UBXN10-AS1;CDA;CLIC4;RUNX3;PAQR7;CD52;KDF1;TENT5B;LCK;ZBTB8B;COL8A2;CSF3R;RHBDL2;AL592166.1;ACOT11;SORT1;CD2;TENT5C;TXNIP;ECM1;S100A9;S100A8;S100A5;SHE;NTRK1;MNDA;FCER1A;FCER1G;TOMM40L;CD247;GPR161;RASAL2;NCF2;PTGS2;PTPRC;AL512306.3;NFASC;G0S2;TRAF3IP3;ZNF670;TRIM58;SLC8A1;HAAO;ZFP36L2;BCL11A;CNRIP1;ANTXR1;AAK1;HK2;TMEM150A;AC015971.1;CYTOR;IL1R2;IL1RL1;IL1A;IL1RN;AC009303.2;KYNU;ZEB2…	TNFRSF18;RER1;ACOT7;CEP85;THEMIS2;LAPTM5;AC114490.2;RHBDL2;AL592166.1;RPS8;TMEM59;PLPP3;JUN;NFIA;GADD45A;PTGER3;GBP2;GFI1;RPL5;CNN3;AC118553.2;SORT1;CD53;C1orf162;PTPN22;CD160;TXNIP;CTSS;PSMB4;S100A9;RAB13;CCT3;MEF2D;MNDA;CD84;ARHGAP30;FCER1G;MGST3;TMCO1;SELL;AL353708.3;RGS16;FAM129A;PTGS2;B3GALT2;PPP1R12B;LAX1;NFASC;NUCKS1;IKBKE;RASSF5;CD55;CD46;MIR29B2CHG;NENF;H3F3A;NLRP3;YWHAQ;ROCK2;RHOB;ADCY3…
NK_cell	0	0	0	0	0	0	0	0	0	0	0	0	0	PIK3CD-AS2;EPHA2;AZIN2;CDC20;TMEM56;TXNIP;RASAL2;GLUL;ZBTB18;LINC01814;IGKC;DUSP2;C2orf92;IL1B;NCKAP5;AC011893.1;FMNL2;NR4A2;ERMN;SCN9A;KANSL1L;AC092053.3;ATRIP;GATA2;CNBP;TRPC1;LAMP3;CLCN2;TLR10;JCHAIN;AC053527.1;AREG;WDFY3;FAM160A1;TRIM61;CENPU;IL7R;DAB2;DEPDC1B;IRF1;TGFBI;MZB1;HIST1H2AH;AL645933.2;PPIL1;TBC1D22B;KHDC1;PNISR;AMD1;PKIB;CENPW;TNFAIP3;FAM220A;TSPAN13;STK17A;PILRA;KMT2E;PAXIP1-AS2;…	AGRN;ANKRD65;PHF13;PDPN;KAZN;EPHA2;CAMK2N1;ZNF683;RPS6KA1;TRNP1;SYTL1;TINAGL1;ZNF362;GJA4;OSCP1;ZC3H12A;FOXD2;CDKN2C;CPT2;PLPP3;CACHD1;RAVER2;WLS;ADGRL2;TTLL7;CYR61;GBP5;CNN3;AC105942.1;TMEM56;PSRC1;SORT1;GSTM4;SLC16A4;DENND2D;C1orf162;PTGFRN;TENT5C;CD160;ANKRD35;SEMA6C;SELENBP1;SH2D2A;PYHIN1;CD48;SLAMF7;FCER1G;FCGR3A;DDR2;RGS5;CREG1;MPZL1;XCL2;FASLG;RGL1;PLA2G4A;RGS1;RGS13;CAMSAP2;CSRP1;SHISA4;R…	CNR2;FGR;PTAFR;VANGL1;NTRK1;PTGS2;FAM84A;LGALSL;HK2;TANC1;RAPH1;NRP2;ACADL;CXCR2;B3GNT7;CDCP1;LTF;STAB1;FAM107A;PTPRG;CADPS;MITF;PROS1;ST3GAL6;LSAMP;CHST2;CPA3;P2RY1;SLC49A3;SOD3;STAP1;CXCL2;HPGDS;HPGD;MYO10;ELOVL7;SLCO4C1;NREP;AC011416.3;PCDHGB6;WWC1;RCAN2;ENPP3;RAB32;DLL1;SCIN;HOXA13;EPDR1;LAT2;CTTNBP2;KIAA1549;LINC00996;TMEM176A;KCNH2;VIPR2;CRLF2;HMGN5;RPS6KA6;MYOM2;FAM167A;DLC1;PEBP4;ADAM28;F…	TNFRSF18;TNFRSF14-AS1;SLC45A1;KAZN;TMEM51;EPHA2;CAMK2N1;ZNF436-AS1;ID3;CD52;ZNF683;TRNP1;FGR;TINAGL1;COL16A1;LCK;ZNF362;GJA4;AL050341.2;YBX1;B4GALT2;SLC6A9;LURAP1;FOXD2;CDKN2C;PLPP3;PRKAA2;CACHD1;RAVER2;NEXN-AS1;NEXN;GFI1;AC105942.1;VAV3;SORT1;GSTM4;DENND2D;C1orf162;CD160;ANKRD35;MTMR11;CTSK;SEMA6C;TNFAIP8L2;SELENBP1;S100A6;NES;SH2D2A;PYHIN1;SLAMF6;CD84;CD48;SLAMF7;F11R;ARHGAP30;FCER1G;DDR2;RGS5;…
Pre-B_cell_CD34-	0	0	0	0	0	0	0	0	0	0	0	0	0	0	PLA2G2A;ID3;THEMIS2;MACF1;NFYC-AS1;PRDX1;JUN;LEPROT;MCOLN2;C1orf162;CSDE1;TXNIP;MRPS21;S100A6;FCER1A;SLAMF7;FCER1G;CSRP1;NUCKS1;RAB7B;RASSF5;NENF;ROCK2;LAPTM4A;RHOB;MRPL33;CALM2;SPTBN1;PLEK;MAT2A;IGKC;COX5B;EIF5B;PPIG;AC114760.2;SF3B1;CASP8;IGFBP5;PTMA;HDLBP;GOLGA4;CTNNB1;NKTR;MAP4;ARF4;MTRNR2L12;ZBTB20;CNBP;EIF4A2;LPP;CLNK;SOD3;CCNI;ANXA5;CPE;SELENOP;IRF1;UQCRQ;SKP1;EGR1;HSPA9;NR3C1;CD74;DUSP1;C…	AL691432.2;GPR153;PIK3CD-AS2;PQLC2;PAQR7;CD52;LCK;AL591845.1;AL139260.1;KIF2C;BEND5;JUN;EVI5;BCAR3;TMEM56;KCNA2;PPM1J;TXNIP;S100A8;CD1D;MNDA;FCER1A;CD48;FCER1G;RASAL2;RHEX;C1orf116;PFKFB2;ESRRG;ZBTB18;LINC01814;ID2;SRSF7;SLC3A1;HK2;CD8A;IGKC;DUSP2;IL1B;AC011893.1;FMNL2;NR4A2;CYTIP;CD302;COBLL1;STK17B;SF3B1;LINC00852;CCK;NKTR;RBM5-AS1;LINC02019;DNASE1L3;MTRNR2L12;CD96;CNBP;P2RY14;LAMP3;TMEM44-AS1;…	ATAD3C;TNFRSF1B;PLA2G2A;ID3;SRSF10;THEMIS2;LAPTM5;AZIN2;MACF1;RPS8;PRDX1;TTC39A;JUN;LEPROT;MCOLN2;RPL5;VAV3;CD53;C1orf162;CSDE1;CD160;TXNIP;MRPS21;S100A6;S100A4;RPS27;SLAMF7;LY9;NDUFS2;FCER1G;SELL;CSRP1;NUCKS1;RASSF5;ESRRG;GNG4;RGS7;ROCK2;RHOB;MRPL33;CRIM1;RHOQ;CALM2;RPS27A;PLEK;MTHFD2;MAT2A;IGKC;COX5B;EIF5B;SCN9A;PPIG;AC114760.2;SF3B1;RPL37A;IGFBP5;AP1S3;PTMA;INPP5D;GPR35;HDLBP;RPL32;GOLGA4;CTNN…
Smooth_muscle_cells	0	0	0	0	0	0	0	0	0	0	0	0	0	0	0	AL645608.8;AGRN;SCNN1D;GPR153;TNFRSF25;PHF13;RBP7;C1orf167;PLOD1;KAZN;TMEM51;MFAP2;CAMK2N1;ECE1;ZNF683;RPS6KA1;SYTL1;PTPRU;SDC3;ADGRB2;FNDC5;COL8A2;AL591845.1;OSCP1;BMP8A;HPCAL4;BMP8B;FOXO6;SLC6A9;LURAP1;CYP4X1;FOXD2;TRABD2B;SPATA6;BEND5;ZFYVE9;PARS2;AC099791.2;ROR1;LEPR;FPGT-TNNI3K;TTLL7;MCOLN3;SYDE2;AL078459.1;AC092807.3;CYR61;GBP5;EVI5;FNBP1L;BCAR3;AC105942.1;CELSR2;SORT1;SLC16A4;DENND2D;DCLRE…	SAMD11;ANKRD65;PODN;GLIS1;LEPR;DIRAS3;PTGER3;NEGR1;AC093157.1;KCND3;ARHGAP30;HMCN1;HSD11B1;PLEK;SP5;TMEFF2;SNED1;FANCD2;FAM107A;LSAMP;PCOLCE2;APOD;HTRA3;BST1;CXCL6;SPOCK3;NKD2;AC025171.2;FGF10;BHMT2;CMYA5;THBS4;LOX;NRG2;PCDHGA5;DLL1;LFNG;THSD7A;ITGB8;CPVL;IGFBP3;STAG3;ITM2A;SRPX2;MUM1L1;PAK3;IL13RA2;SFRP1;PREX2;RDH10;ZFHX4;RGS22;AZIN1-AS1;IL33;CCL21;NXNL2;SEMA4D;NEK6;DNM1;PTGES;DCHS1;PAMR1;PDGFD;…
T_cells	0	0	0	0	0	0	0	0	0	0	0	0	0	0	0	0	AL645608.8;HES4;TNFRSF18;FNDC10;GPR153;CAMTA1-DT;PIK3CD-AS2;KAZN;ALDH4A1;CAMK2N1;ZNF683;PTPRU;TINAGL1;LCK;ZSCAN20;COL8A2;AL591845.1;OSCP1;RIMS3;FOXO6;B4GALT2;ARMH1;CYP4X1;FOXD2;TRABD2B;SPATA6;BEND5;SHISAL2A;COA7;AC099791.2;NEXN;TTLL7;MCOLN2;CYR61;GFI1;BCAR3;VAV3;DENND2D;DCLRE1B;PTGFRN;CD101;AC245595.1;MTMR11;C1orf54;SEMA6C;LYSMD1;S100A6;AL358472.4;MUC1;SH2D2A;PEAR1;PYHIN1;SLAMF6;CD84;CD48;SLAMF7;…
Tissue_stem_cells	0	0	0	0	0	0	0	0	0	0	0	0	0	0	0	0	0
Tumor Negative Cells
	B_cell	Chondrocytes	CMP	DC	Endothelial_cells	Epithelial_cells	Fibroblasts	Hepatocytes	HSC_CD34+	Macrophage	Monocyte	Neutrophils	NK_cell	Pre-B_cell_CD34-	Smooth_muscle_cells	T_cells	Tissue_stem_cells
B_cell	0	AGRN;VWA1;TNFRSF25;PER3;ERRFI1;FBLIM1;NBPF1;CD52;TINAGL1;ZNF362;C1orf216;EVA1B;DNALI1;B4GALT2;TMEM53;TRABD2B;ZFYVE9;TTC4;PLPP3;GNG12;ABCD3;AC105942.1;SNX7;CD53;KCND3;AC245014.3;C1orf54;CTSS;CTSK;LYSMD1;S100A6;SYT11;KIRREL1;CD48;ARHGAP30;ADAMTS4;RGS5;PBX1;SOX13;CD55;PLXNA2;VASH2;KCTD3;MARK1;ENAH;KCNK1;LTBP1;CYP1B1;SLC8A1;DYNC2LI1;EPAS1;BCL11A;PLEK;ARHGAP25;PRADC1;TCF7L1;EIF2AK3;IGKC;DUSP2;FHL2;SOW…	HES4;ACOT7;TNFRSF1B;PADI2;PAFAH2;SYTL1;LCK;KIAA1522;TIE1;BTBD19;TSPAN1;PDE4B;LMO4;GBP1;CHI3L2;SLC16A1-AS1;S100A6;S100A4;SLC27A3;SYT11;LMNA;SEMA4A;SLC25A44;PAQR6;GLMP;ARHGEF11;SLAMF1;FCER1G;FCGR2B;XCL2;GLUL;PTGS2;RGS13;ELF3;SOX13;RHEX;FCMR;GPR137B;OPN3;NLRP3;CMPK2;LAPTM4A;SDC1;MFSD2B;FOSL2;LINC00309;SPRED2;PRADC1;CAPG;IGKC;AFF3;BIN1;HS6ST1;CXCR4;ACVR1;TANC1;ITGA6;TTN;CCDC141;NCKAP1;CAVIN2;NRP2;TNS…	CAMK2N1;ZBTB40;CNR2;TESK2;MMACHC;CDKN2C;C1orf54;SLAMF1;LY9;FCER1G;FCGR2A;SELL;RASAL2;TLR5;AL160408.3;AC062029.1;IGKC;IL1B;PTPN4;KIF5C;SLC38A11;CYBRD1;NCKAP1;CARF;ZDBF2;LINC01857;SP140;GHRL;OSBPL10;CX3CR1;AC099778.1;STAB1;ST3GAL6;SIDT1;CCDC58;PARP15;FAM43A;S100P;CEP135;STAP1;CXCL8;EREG;CXCL10;WDFY3;HERC5;BANK1;SLC9B2;MGST2;MAML3;ARHGAP10;TMEM154;SLC12A7;FYB1;ANXA2R;CCL28;ADAMTS6;HBEGF;CD14;CSF1R;S…	VWA1;PER3;FBXO2;AGMAT;NBPF3;HSPG2;ASAP3;ID3;CNR2;FAM110D;SYTL1;FAM167B;BMP8B;CITED4;TIE1;ARMH1;BTBD19;SHISAL2A;PODN;PLPP3;LEPR;GNG12;IFI44;ADGRL4;LINC01781;TGFBR3;ARHGAP29;CNN3;TMEM56;SNX7;PALMD;CTTNBP2NL;MOV10;VANGL1;NBPF14;AC245297.3;S100A16;MEX3A;FCRL2;MNDA;PYHIN1;ACKR1;SLAMF6;AL121985.1;SLAMF7;TOMM40L;RGS5;FAM78B;RCSD1;SELE;LAMC1;CAMSAP2;LAX1;RHEX;CR2;CR1;TRAF3IP3;TGFB2;HLX;CCSAP;GNG4;RGS7;KM…	AL139246.3;KCNAB2;ERRFI1;PIK3CD;TNFRSF1B;PDPN;ARHGEF10L;ALPL;WNT4;ZNF436-AS1;CNR2;RHCE;CD52;KDF1;FGR;SDC3;KIAA1522;CITED4;CYP4B1;SHISAL2A;MCOLN2;S1PR1;AL365361.1;KCNA3;C1orf162;BCL9;LYSMD1;S100A11;S100A2;S100A16;MEX3A;SH2D2A;FCRL2;MNDA;AIM2;CD84;SLAMF1;SLAMF7;LY9;CD244;AL359541.1;NOS1AP;RGS5;RCSD1;ATP1B1;SELL;ANGPTL1;KIF21B;PHLDA3;ELF3;PTPN7;LINC01136;LAX1;FCMR;PIGR;CR1;KCTD3;DNAH14;ITPKB-AS1;RAS…	ISG15;UBE2J2;ERRFI1;MIIP;TNFRSF1B;PRDM2;CD52;RPS6KA1;WDTC1;SNHG12;YTHDF2;EPB41;LAPTM5;LCK;MARCKSL1;TRAPPC3;LSM10;RLF;CDKN2C;TUT4;PLPP3;LEPR;RABGGTB;AC118549.1;PRKACB;RPF1;GTF2B;DNTTIP2;SNX7;TRMT13;GSTM5;CD53;LRIF1;DRAM2;DENND2D;CAPZA1;PTPN22;BCAS2;TENT5C;LINC00623;AC245014.3;AC245297.3;RPRD2;CTSS;CTSK;UBAP2L;SLC50A1;SYT11;KIRREL1;AIM2;CD48;SLAMF7;TSTD1;ARHGAP30;UHMK1;RGS5;RCSD1;TOR3A;STX6;RNF2;RG…	MMEL1;RPL22;PRDM2;CDC42;ASAP3;FAM110D;YBX1;UQCRH;FAAH;PARS2;WLS;RPL5;PIFO;TXNIP;EFNA1;RALGPS2;BTG2;KCTD3;GNG4;RPS7;YPEL5;DYNC2LI1;EPAS1;CALM2;AC017083.1;IGKC;IL1R1;HNMT;TANC1;CERS6;NCKAP1;RPL37A;IGFBP2;ARPC2;NCL;NKIRAS1;GPD1L;RPSA;ZNF197;SELENOK;FSTL1;GATA2;CNBP;COPG1;SLC33A1;CCNL1;SEC62;NAALADL2;MUC20;CCDC149;RPL9;PCAT4;AC093827.4;NPNT;C5orf38;SNHG18;MYO10;RANBP3L;RPL37;ELOVL7;NLN;SNX2;SLC36A1;N…	VWA1;TNFRSF25;ERRFI1;ENO1;PRDM2;NBPF1;CDA;HNRNPR;SRRM1;SYF2;RSRP1;DNAJC8;ATP5IF1;LAPTM5;FAM167B;THRAP3;NDUFS5;SMAP2;TIE1;ATP6V0B;MMACHC;PIK3R3;UQCRH;TUT4;PODN;TMEM59;PLPP3;JAK1;LEPR;ADGRL4;CD53;DRAM2;BCAS2;PLEKHO1;MCL1;CTSS;S100A16;JTB;ADAM15;EFNA1;SSR2;ARHGEF11;CD48;TSTD1;PFDN2;RGS5.1;SELL;RASAL2;PTPRC;PHLDA3;CD55;PROX1;HLX;H3F3A;TOMM20;ODC1;HADHA;OST4;PPP1CB;AL121658.1;LTBP1;CCDC85A;REL;MOB1A;C…	FNDC10;PLA2G2D;C1QA;C1QC;C1QB;PTAFR;LCK;BTBD19;WLS;LINC01781;FAM69A;DPYD;CHI3L2;AL390729.1;S100A9;S100A8;FCRL1;CD1C;SLAMF1;FCER1G;FCGR2A;FCGR3A;FCRLA;XCL1;GLUL;NCF2;PTGS2;KIF21B;PFKFB2;PROX1;TLR5;DISC1;SPRED2;IGKC;AC109826.1;MERTK;IL1B;SAP130;HNMT;FMNL2;CD302;CYBRD1;CD28;NRP2;UNC80;CYP27A1;WNT10A;SP140;SRGAP3;OSBPL10;ACVR2B;ZNF660;CCR1;STAB1;DNASE1L3;ST3GAL6;BTLA;AC093010.2;PLXND1;PLD1;ETV5;JCHAI…	HES4;FNDC10;PGD;TMEM51;AGMAT;C1QA;C1QB;CNR2;MAN1C1;FGR;AL136115.2;AZIN2;CSF3R;BTBD19;MOB3C;WLS;S1PR1;AL390036.1;CTTNBP2NL;CD101;FMO5;CTSS;TNFAIP8L2;S100A11;S100A9;S100A12;S100A8;S100A6;S100A4;SYT11;ARHGEF11;FCRL1;MNDA;SLAMF6;FCER1G;TOMM40L;FCGR2A;FCGR3A;RASAL2;NPL;NCF2;PTGS2;MIR181A1HG;IL20;NLRP3;CMPK2;FOSL2;SLC8A1;KIAA1841;PLEK;TMSB10;IGKC;IGKV4-1;INPP4A;LIMS1;IL1B;IL1RN;SAP130;HNMT;ZEB2;ZEB2-AS…	HNRNPR;MARCKSL1;KIAA1522;MEAF6;FUBP1;DRAM2;AC245014.3;S100A9;S100A12;S100A8;FDPS;SYT11;ARHGAP30;FCER1G;FCGR2A;FCGR2B;RALGPS2;DHX9;PTGS2;RGS18;NLRP3;IAH1;ODC1;PDIA6;AC104695.3;YPEL5;CYP1B1;CCT7;IGKC;IL18RAP;IL1A;IL1B;BIN1;COBLL1;CIR1;ITGA4;DNAJC10;ALS2;CUL3;SP110;GPR35;OSBPL10;CCDC12;TMF1;LINC00877;ST3GAL6;CSTA;PARP15;PARP14;GATA2;MBD4;ACPP;TBL1XR1;KLHL24;ST6GAL1;CCDC50;TMEM44;PPP1R2;HS3ST1;BST1;S…	ALPL;CLIC4;POU3F1;BCAR3;PYGO2;EFNA4;TMEM79;FCRL2;FCRL1;AIM2;AL121985.1;FCGR2B;CD247;XCL1;ANGPTL1;IL24;CR2;MIR29B2CHG;HHAT;CCSAP;LINC01871;GEN1;SDC1;CCDC121;EHD3;FAM98A;BCL11A;AC012368.1;LINC00309;GNLY;CD8A;IGKC;IGKV4-1;IL18RAP;AC078883.1;STAT4;PIKFYVE;UNC80;RHBDD1;COL4A3;PASK;SGO1;UBE2E2;OSBPL10;CXCR6;KBTBD8;BTLA;EAF2;CD86;TPRG1;S100P;TLR1;TLR6;KLHL5;JCHAIN;TBC1D9;ARHGAP10;MARCH1;SNX25;FYB1;GAPT;…	CDA;PTAFR;EPB41;AL050341.2;CDKN2C;WLS;AC103591.3;BCAS2;TENT5C;FMO5;S100A9;S100A12;S100A8;CRABP2;SH2D2A;IFI16;LINC01133;CD247;SELL;PTGS2;RGS13;TRAF5;KCNK1;NLRP3;SLC8A1;EPAS1;RHOQ;PRADC1;CD8A;IGKC;AFF3;MAP4K4;IL1B;IL1RN;MZT2A;HNMT;ZEB2-AS1;COBLL1;DNAJC10;AC020571.1;CD28;METTL21A;LINC01857;PID1;SP140L;SP100;ITM2C;INPP5D;APPL1;PARP15;ZNF148;MBD4;ACPP;GPR171;MUC4;TFRC;FYTTD1;FGFBP2;SEL1L3;JCHAIN;CXCL2…	HES4;KLHL21;THAP3;PER3;ERRFI1;SLC45A1;TMEM51;FBLIM1;NBPF1;CAMK2N1;ZNF436-AS1;ASAP3;CNR2;MAN1C1;RPS6KA1;MATN1-AS1;SDC3;TINAGL1;EVA1B;DNALI1;AL050341.2;CITED4;MOB3C;CDKN2C;ZFYVE9;SHISAL2A;PLPP3;TACSTD2;NFIA;AC099791.2;PDE4B;WDR78;GNG12;WLS;SYDE2;CNN3;SNX7;VAV3;GSTM2;CTTNBP2NL;MOV10;HIPK1-AS1;C1orf54;LYSMD1;S100A6;S100A4;ARHGEF11;AIM2;PIGM;LY9;ARHGAP30;KLHDC9;FCGR2B;RGS5;SELL;RASAL2;LAMC1;CAMSAP2;PH…	AL139246.3;ALPL;CNR2;CLIC4;ZNF683;BTBD19;BEND5;EVI5;FNBP1L;BCAR3;NTNG1;CD2;SH2D2A;FCRL2;FCRL1;MNDA;FCGR2B;CD247;XCL2;ANGPTL1;LAMC1;NCF2;B3GALT2;NUAK2;RHEX;CR1;FAM177B;LINC01871;GEN1;RASGRP3;ADD2;CD8B;IGKC;ZAP70;LYPD6B;STAT4;PLCL1;ICOS;AP1S3;B3GNT7;FARP2;TTC21A;CXCR6;CCR5;INKA1;DNASE1L3;NECTIN3;CD80;CD86;CHST2;TPRG1;ZDHHC19;JAKMIP1;TLR10;TLR6;TXK;TEC;STAP1;JCHAIN;AC098818.2;HPGDS;BANK1;UGT8;TBC1D9…	HES4;ICMT;PER3;FBLIM1;PADI2;CAMK2N1;ZNF436-AS1;CNR2;TRNP1;THEMIS2;SDC3;TINAGL1;NCDN;C1orf216;EVA1B;AL050341.2;CITED4;B4GALT2;TRABD2B;SHISAL2A;PLPP3;WDR78;GNG12;WLS;NEXN;LINC01781;SNX7;S1PR1;VAV3;CELSR2;GSTM4;C1orf162;MAGI3;C1orf54;CTSK;S100A6;S100A4;SLC27A3;GLMP;ARHGEF11;CD1D;SLAMF6;SLAMF1;CD48;ADAMTS4;TOMM40L;FCGR2B;RGS5;PRRX1;RASAL2;LAMC1;RGL1;CAMSAP2;PHLDA3;CSRP1;PTPN7;PPP1R12B;LAX1;SOX13;IKBK…
Chondrocytes	0	0	VWA1;ACOT7;TNFRSF25;EFHD2;WNT4;LINC01355;TCEA3;ID3;SH3BGRL3;CD52;PIGV;SFN;AHDC1;RAB42;TINAGL1;COL16A1;KIAA1522;OSCP1;LINC01137;ZC3H12A;DNALI1;POU3F1;ZNF684;CITED4;PTPRF;B4GALT2;PLK3;TSPAN1;MOB3C;FOXD2;AL606760.3;PLPP3;TACSTD2;AK4;IFI44L;ADGRL2;LINC01725;SSX2IP;SYDE2;DDAH1;CYR61;GBP1;GBP2;ARHGAP29;F3;GSTM5;CD53;KCND3;SLC16A1-AS1;CD58;AC245595.1;AC245014.3;ACP6;PDE4DIP;HIST2H2BE;BOLA1;VPS45;C1orf54…	SAMD11;GPR153;FBXO2;PDPN;EFHD2;CROCC;MFAP2;ARHGEF10L;PINK1;ZBTB40;C1QC;C1QB;CD52;PIGV;TINAGL1;ZC3H12A;ZNF684;IPO13;CCDC24;TESK2;IPP;PLPP3;PRKAA2;HOOK1;ADGRL2;TTLL7;TGFBR3;CDC14A;EXTL2;PRMT6;PSRC1;GSTM2;STRIP1;SLC16A4;CD53;MAGI3;CD58;AC245595.1;AC245014.3;PRKAB2;BCL9;OTUD7B;CTSS;CTSK;THBS3;RRNAD1;ETV3;FCGR2A;OLFML2B;RGS5;XCL1;RGS1;ELF3;FMOD;DSTYK;HSD11B1;HHAT;PTPN14;DNAH14;AGT;AC104794.2;CYS1;LINC…	TNFRSF18;GPR153;RBP7;FBXO2;PDPN;TMEM51;MFAP2;ARHGEF10L;HSPG2;WNT4;TRNP1;TMEM200B;COL8A2;C1orf210;TIE1;PIK3R3;PODN;ACOT11;PRKAA2;HOOK1;L1TD1;LEPR;PTGER3;GIPC2;LINC01725;LRRC8C;FAM69A;SLC44A3;TMEM56;PALMD;S1PR1;PSRC1;KCNC4;PIFO;LINC01750;NOTCH2;LINC00623;TXNIP;NOTCH2NL;GJA5;TPM3;KCNN3;AL590560.2;RCSD1;SELE;FMO2;DNM3;COLGALT2;IVNS1ABP;PLEKHA6;CDK18;CD55;CD34;SLC30A1;VASH2;HLX-AS1;HHIPL2;PGBD5;ALKAL2…	SAMD11;PRDM16;SLC45A1;SLC25A34;HSPB7;MFAP2;PLA2G5;AL031432.3;AL020996.1;SFN;KIAA1522;FNDC5;ZC3H12A;HEYL;RIMS3;KCNQ4;SLFNL1-AS1;TIE1;FAAH;FOXD2;TRABD2B;AL606760.3;GLIS1;DHCR24;AC105277.1;AL357078.3;PTGER3;GFI1;TMEM56-RWDD3;PALMD;NGF;FAM72B;ANKRD34A;GJA5;ECM1;FALEC;CTSK;AL358472.3;AL358472.2;SYT11;RAB25;TMEM79;AL365181.4;SH2D2A;PEAR1;AL590560.2;OLFML2B;RGS4;RGS5;RCSD1;DPT;CCDC181;ANGPTL1;COLGALT2;H…	HES4;ISG15;TNFRSF4;UBE2J2;MMP23B;LRRC47;GPR153;PHF13;CAMTA1;CTNNBIP1;KIF1B;AGTRAP;MIIP;PDPN;KAZN;TMEM51;MFAP2;SDHB;ARHGEF10L;EIF4G3;ZBTB40;TCEA3;FUCA1;AHDC1;IFI6;YTHDF2;MARCKSL1;SMIM12;AGO1;AGO3;TRAPPC3;MRPS15;FHL3;POU3F1;RLF;FOXJ3;TMEM69;ZFYVE9;MAGOH;PRKAA2;HOOK1;ROR1;CACHD1;SLC35D1;TYW3;PIGK;AC118549.1;DNAJB4;IFI44L;PRKACB;RPF1;CTBS;SSX2IP;GTF2B;DNTTIP2;ABCD3;TRMT13;SLC25A24;SORT1;LRIF1;DRAM2;A…	CDC42;ID3;HMGN2;YBX1;UQCRH;SERBP1;RPL5;TXNIP;BTG2;NENF;LAPTM4A;ATRAID;EPAS1;CALM2;RTN4;ATP5MC3;HSPD1;RPL37A;IGFBP5;ARPC2;NCL;RHOA;ARL6IP5;MTRNR2L12;CNBP;SEC62;HES1;ATP5ME;RPL9;CCNI;PCAT4;SORBS2;SKP1;NPM1;ATP6V0E1;HLA-A;HLA-C;HSPA1A;HSPA1B;COL9A1;PNRC1;PNISR;ACTB;NPY;HSPB1;CD99;NDUFB11;TIMP1;MAGED2;NDUFA1;SARAF;CEBPD;UQCRB;COX6C;HSPA5;RPLP2;CD81;NUCB2;MDK;AHNAK;FKBP2;TRMT112;FAU;GSTP1;NDUFC2;CRYAB…	SDF4;PARK7;ENO1;AKR7A2;CAPZB;NBL1;HNRNPR;SRRM1;SYF2;RSRP1;TMEM50A;WASF2;DNAJC8;ATP5IF1;THRAP3;MEAF6;NDUFS5;ATP6V0B;UQCRH;TUT4;SCP2;PODN;TMEM59;PLPP3;NFIA;JAK1;LEPR;MIER1;GNG12;DNAJB4;GBP1;PALMD;BCAS2;MCL1;PSMD4;S100A4;JTB;PBXIP1;SSR2;NES;PFDN2;PBX1;MGST3;PRDX6;PHLDA3;CSRP1;ATP2B4;SNRPE;CD46;NENF;DEGS1;ENAH;H3F3A;TOMM20;KIDINS220;YWHAQ;DDX1;LAPTM4A;SF3B6;HADHA;OST4;MRPL33;PPP1CB;LTBP1;RHOQ;RTN4;DG…	ANKRD65;VWA1;MMP23B;PDPN;FBLIM1;HSPB7;HSPG2;C1QC;C1QB;CD52;RPS6KA1;PIGV;COL16A1;FAM229A;ZBTB8A;OSCP1;DNALI1;POU3F1;CITED4;CYP4X1;ZFYVE9;RAVER2;SGIP1;GNG12;NEXN;SSX2IP;TGFBR3;FAM69A;GSTM5;GSTM3;CD53;PIFO;CD58;AC245595.1;AC245014.3;ANKRD35;ITGA10;ECM1;CTSS;SELENBP1;ATP8B2;PEAR1;KIRREL1;AL590560.2;ATP1A2;ARHGAP30;FCGR2A;RGS5;GLUL;IVNS1ABP;HMCN1;RGS1;CFH;SHISA4;FMOD;PRELP;ATP2B4;SOX13;PLEKHA6;CD34;PL…	SAMD11;MMP23B;GPR153;PHF13;RBP7;FBXO2;TNFRSF1B;KAZN;EFHD2;PLA2G2A;WNT4;C1QC;C1QB;LINC01355;ASAP3;SH3BGRL3;CD52;RPS6KA1;TENT5B;AL360012.1;TINAGL1;COL16A1;RNF19B;ZC3H12A;SMAP2;PLK3;CYP4X1;TTC39A;PODN;ROR1;CACHD1;PDE4B;NEXN;AC103591.3;SYDE2;CYR61;CSF1;SLC16A4;CD53;CD58;PTGFRN;AC245595.1;AC245014.3;NBPF19;SV2A;PLEKHO1;ECM1;MCL1;CTSS;LYSMD1;S100A11;DENND4B;TPM3;SEMA4A;NES;ETV3;AL590560.2;ATP1A2;CD48;A…	VWA1;AKR7A2;HNRNPR;CD52;WASF2;IFI6;STX12;EIF3I;MARCKSL1;AK2;MEAF6;SF3A3;BTF3L4;ECHDC2;PLPP3;FUBP1;CNN3;SARS;CD53;RHOC;CTSS;S100A13;SLC39A1;RAB13;FDPS;SEMA4A;ETV3;MGST3;TIPRL;ATP1B1;TOR1AIP2;FAM129A;PTGS2;RGS13;CD55;DEGS1;ENAH;EPHX1;MRPL55;IAH1;ODC1;PDIA6;RHOB;SF3B6;HADHB;DPY30;SOS1;PREPL;CRIPT;SPTBN1;CFAP36;COMMD1;PLEK;MXD1;PCYOX1;CCT7;VAMP5;CHMP3;EIF2AK3;DUSP2;ZC3H6;IL1B;TNFAIP6;GORASP2;OLA1;CIR…	SAMD11;AGRN;MMP23B;SLC35E2A;RNF207;ICMT;GPR153;PHF13;PER3;MIR34AHG;MFN2;KAZN;FBLIM1;FBXO42;NBPF1;ARHGEF10L;PLA2G2A;CAMK2N1;WNT4;LINC01355;ASAP3;CD52;PIGV;TMEM200B;SDC3;SERINC2;COL16A1;FAM229A;ZBTB8A;TMEM54;ZNF362;COL8A2;EVA1B;BMP8B;TRIT1;ZNF684;KCNQ4;SCMH1;SVBP;IPO13;CCDC24;TESK2;NSUN4;MOB3C;CYP4X1;TRABD2B;SPATA6;BEND5;OSBPL9;RAB3B;ZFYVE9;GPX7;PLPP3;EFCAB7;PGM1;ROR1;CACHD1;ADGRL2;LINC01725;SSX2IP…	HES4;SDF4;NBL1;CAMK2N1;PINK1;DDOST;C1QC;C1QB;ID3;CD52;KPNA6;EIF3I;EVA1B;SF3A3;HYI;OSBPL9;NRDC;NFIA;GNG12;DNAJB4;ADGRL2;CYR61;RPAP2;ARHGAP29;SARS;GSTM3;CD53;CTSS;PSMD4;PMVK;IFI16;NDUFS2;MGST3;CD247;MPZL1;RASAL2;TOR1AIP2;RGS13;CFH;CSRP1;ELF3;NENF;CDC42BPA;ROCK2;ATRAID;LBH;CRIM1;RHOQ;CRIPT;PLEK;ANXA4;TIA1;PCYOX1;VAMP5;GNLY;CD8A;DUSP2;REV1;MAP4K4;IL1B;MZT2A;MMADHC;RND3;TNFAIP6;CYTIP;COBLL1;CYBRD1;PRK…	PRDM16;PLA2G2A;MATN1-AS1;SERINC2;TTC39A;RAB3B;HMGCS2;AC010883.1;MIR4435-2HG;FIGN;TMEFF2;HECW2;ITIH3;BTC;RNF175;MYO10;KCNN2;TRIM36;MZB1;DSP;AL138885.3;HLA-G;SLC44A4;SPDEF;AL034374.1;HOXA-AS2;CLDN4;PPP1R35;ASZ1;CHMP4C;AC023590.1;PTGDS;LRRC26;FJX1;AC087521.1;SIPA1;SLC35F2;SCN4B;MPZL2;MSMB;MYOZ1;IFIT3;AL731571.1;GPRC5D-AS1;AC012085.2;AMER2;FOXA1;FOXN3-AS1;PRIMA1;TPSB2;CRYM;MMP15;IL34;AC027575.2;MKKS;…	VWA1;MMP23B;GPR153;MIR34AHG;PDPN;TMEM51;HSPB7;ARHGEF10L;ALDH4A1;PLA2G2A;HSPG2;LINC01355;CD52;TENT5B;AHDC1;TMEM200B;FABP3;TINAGL1;COL16A1;FAM229A;ZBTB8A;COL8A2;EVA1B;DNALI1;FHL3;C1orf210;B4GALT2;TMEM53;CYP4X1;FOXD2;SPATA6;BEND5;ZFYVE9;GLIS1;CYP2J2;AC099791.2;CACHD1;GNG12;AK5;LINC01725;SSX2IP;SYDE2;DDAH1;EVI5;BCAR3;SLC44A3;SNX7;CELSR2;PSRC1;SORT1;GSTM2;GSTM1;CD53;KCND3;CTTNBP2NL;WNT2B;PTGFRN;AC2455…	SAMD11;TNFRSF18;UBXN10-AS1;ASAP3;SERINC2;FNDC5;BMP8B;TSPAN1;TTC39A;HOOK1;PTGFR;SLC44A3;VAV3;PIFO;AL590560.2;COLGALT2;DNAH14;URB2;KCNK1;LINC00954;QPCT;CHAC2;SULT1C4;MIR4435-2HG;ARHGEF4;CACNB4;ACVR1C;FIGN;AC007405.3;HOXD9;ZNF385B;TMEFF2;ACADL;MLPH;FGD5;MRPS25;ZKSCAN7;SLC26A6;CADM2;ST3GAL6;LSAMP;TXNRD3;IGF2BP2;HTRA3;LIMCH1;KDR;MYO10;ARL15;IQGAP2;TSLP;AC106791.1;MZB1;PCDHGC3;JAKMIP2;AL138885.3;LY6G6F…
CMP	0	0	0	TNFRSF1B;CROCC;PADI4;CAMK2N1;ZBTB40;C1QA;C1QB;ID3;ARMH1;TACSTD2;PDE4B;GBP1;CDC14A;STRIP1;MAGI3;PHTF1;FCGR2A;XCL1;LAX1;PIK3C2B;RHEX;G0S2;SMYD3;HAAO;CNRIP1;MXD1;LOXL3;IL18R1;CCDC138;IL1B;SFT2D3;HS6ST1;AC009506.1;DHRS9;TMEFF2;PLCL1;ALS2;KANSL1L;ARL4C;HDAC4;ZNF445;INKA1;HYAL3;MITF;CCDC58;PARP15;HEG1;ACPP;CPA3;TNIK;ZFYVE28;BST1;FAM114A1;TEC;KIT;CEP135;STAP1;CXCL10;PAQR3;ARHGAP24;SPARCL1;NAP1L5;GPRIN3;…	AGRN;TNFRSF18;VWA1;SMIM1;GPR153;TNFRSF25;UTS2;PIK3CD;FBXO6;PLOD1;TNFRSF1B;DHRS3;UBXN10;HSPG2;ID3;SLC30A2;XKR8;TINAGL1;DNALI1;CITED4;B4GALT2;ARMH1;PIK3R3;CYB5RL;ACOT11;PLPP3;LEPR;PTGER3;IFI44L;ADGRL2;DDAH1;CYR61;GBP1;GBP4;LRRC8C-DT;ARHGAP29;C1orf162;SRGAP2B;NOTCH2NL;C1orf54;S100A4;S100A16;RAB13;ADAM15;PAQR6;NES;IFI16;ACKR1;FCER1A;CD48;ARHGAP30;FCER1G;UCK2;RCSD1;MPZL1;DNM3;RASAL2;PACERR;RGS1;NR5A2;…	AGRN;UTS2;TNFRSF9;LINC01759;PIK3CD;DHRS3;PADI4;UBXN10;TCEA3;ID3;SLC30A2;TRIM63;CNKSR1;SFN;SYTL1;SERINC2;AC004865.2;FHL3;CITED4;TIE1;B4GALT2;CCDC24;ARMH1;TSPAN1;PDZK1IP1;RAB3B;DHCR24;TACSTD2;AC105277.1;PATJ;PTGER3;LINC01725;CYR61;GFI1;ARHGAP29;FRRS1;KIAA1324;ADORA3;HIPK1-AS1;PHGDH;AC245595.1;HIST2H2BE;ADAMTSL4;SELENBP1;S100A4;S100A16;AQP10;SYT11;RAB25;PAQR6;TMEM79;SH2D2A;NTRK1;ATP1A4;RCSD1;RGS18;A…	ISG15;TNFRSF4;UBE2J2;VWA1;ACOT7;TNFRSF9;AGTRAP;MIIP;SDHB;DDOST;ZBTB40;ID3;CD52;RPS6KA1;YTHDF2;LAPTM5;SNRNP40;MARCKSL1;YARS;SMIM12;TRAPPC3;ZC3H12A;INPP5B;FHL3;PABPC4;CAP1;RLF;CCDC30;ARMH1;PLPP3;RABGGTB;ADGRL2;PRKACB;RPF1;CYR61;GTF2B;DNTTIP2;SORT1;CSF1;CD53;DRAM2;DENND2D;DDX20;PTPN22;BCAS2;AC245014.3;AC245297.3;ADAMTSL4;CTSS;CTSK;MLLT11;ILF2;UBAP2L;IL6R;SLC50A1;RIT1;SEMA4A;SLC25A44;NTRK1;CD48;TSTD1…	RPL22;CDC42;C1QA;HMGN2;SFN;YBX1;PRDX1;UQCRH;RAB3B;DHCR24;RPL5;KIAA1324;TXNIP;HIST2H2BE;RAB25;SEMA4A;FCER1G;RGS1;BTG2;PPP1R15B;SLC45A3;KCTD3;RPS7;ID2;LAPTM4A;SELENOI;KRTCAP3;CALM2;VAMP8;IL1R1;HNMT;RPL37A;IGFBP5;ARPC2;NCL;RAMP1;GPC1;CCK;RHOA;SELENOK;ARL6IP5;FOXP1;LINC00960;FSTL1;AC083798.2;GATA2;CNBP;MME;CCNL1;SEC62;TNFSF10;MUC20;CCDC149;FAM114A1;RPL9;SGCB;PARM1;CCNI;PCAT4;PKD2;AP001816.1;GUCY1A1;C…	VWA1;PARK7;ENO1;AGTRAP;CAPZB;DDOST;HNRNPR;ID3;SRRM1;SYF2;RSRP1;TMEM50A;DNAJC8;ATP5IF1;LAPTM5;THRAP3;NDUFS5;YBX1;ATP6V0B;PLK3;PRDX1;UQCRH;TUT4;SCP2;TMEM59;PLPP3;MIER1;GNG5;ARHGAP29;RAP1A;BCAS2;RBM8A;MCL1;S100A4;JTB;ADAM15;SSR2;LMNA;SLC25A44;CD48;TSTD1;PFDN2;FCER1G;PBX1;PRDX6;PTPRC;SLC45A3;CD55;NENF;TGFB2;DUSP10;H3F3A;RHOU;TOMM20;LYST;LAPTM4A;HADHA;OST4;MRPL33;FOSL2;PPP1CB;PRKD3;RTN4;REL;MOB1A;CAPG…	TNFRSF9;FBXO6;TNFRSF1B;HSPG2;C1QA;C1QB;ID3;FUCA1;THEMIS2;ST3GAL3;TAL1;TACSTD2;PDE4B;TCTEX1D1;PTGER3;GBP1;GBP2;GBP5;PDE4DIP;CTSS;S100A9;SLC25A44;FCGR2A;MPZL1;SOAT1;NPL;AL390957.1;LAX1;SOX13;SRGAP2;G0S2;RHOU;PGBD5;EDARADD;SMYD3;MAPRE3;DHX57;MXD1;IL18R1;IL1B;IL1RN;AC110769.2;CXCR4;HNMT;ACVR2A;GPR155;CAVIN2;ALS2;AP1S3;AGAP1;HYAL3;NAA80;ALCAM;DIRC2;HEG1;GATA2;NCK1-DT;SLC9A9;CPA3;MLF1;FNDC3B;GNB4;ST6GA…	TNFRSF18;NADK;ACOT7;TNFRSF1B;PQLC2;UBXN10-AS1;C1QA;C1QC;C1QB;SLC30A2;FGR;THEMIS2;TAL1;TACSTD2;PDE4B;TCTEX1D1;GBP1;GBP2;GBP4;SRGAP2B;PDE4DIP;HIST2H2BF;PLEKHO1;C1orf54;CTSS;S100A10;S100A11;S100A9;S100A8;FCGR2A;UCK2;TBX19;PTPRC;MIR181A1HG;SRGAP2;FCMR;PFKFB2;G0S2;HLX;PGBD5;EDARADD;CHML;NLRP3;GCSAML;ZFP36L2;TTC7A;PLEK;MXD1;BOLA3-AS1;TMSB10;GNLY;INPP4A;RNF149;IL1B;IL1RN;CXCR4;HNMT;GPR155;SESTD1;SLC11A1…	AGTRAP;MEAF6;PDE4B;SARS;CSF1;HIST2H2BF;HIST2H2BE;S100A9;S100A8;FCGR2A;TIPRL;G0S2;DEGS1;ACBD3;KMO;HPCAL1;ODC1;CFAP36;MXD1;CCT7;GNLY;IL1A;IL1B;OLA1;CIR1;SESTD1;UBE2E3;TMBIM1;CUL3;DOCK10;CCL20;PSMD1;CCDC12;THOC7;TMF1;RIOX2;CSTA;DIRC2;HLTF;PPP1R2;TNK2;CXCL8;INPP4B;CDKN2AIP;ACSL1;EMB;MEF2C;CAMLG;CD14;RNF145;NHP2;GMPR;RNF144B;DDX39B;LSM2;HLA-DRA;HLA-DMB;CD164;CITED2;SOD2;CPVL;CDK13;LAT2;CD36;PILRA;BRAF…	SMIM1;ACOT7;FBXO6;TNFRSF1B;UBXN10;PDIK1L;LCK;HYI;ACOT11;LINC01140;MAGI3;CD2;TTF2;NUDT17;SHE;NTRK1;LY9;CD247;XCL2;XCL1;FAM20B;PLA2G4A;AL390957.1;PIK3C2B;FCMR;MIR29B2CHG;LINC00467;PGBD5;AL391832.2;LINC01871;MFSD2B;QPCT;HAAO;MTIF2;BCL11A;EXOC6B;HK2;GNLY;CD8A;BIN1;AC012306.2;CXCR4;ITGA6;FTCDNL1;ASIC4;AGAP1;FBLN2;ITGA9;EXOG;AC092053.3;INKA1;HYAL3;EOGT;LINC00877;ST3GAL6;EAF2;CHCHD6;IFT122;PIK3R4;CPA3;P…	DDOST;C1QA;C1QB;TCEA3;CNKSR1;SFN;XKR8;RNF19B;PPCS;PLK3;TSPAN1;CYP4B1;PDE4B;AC103591.3;F3;CSF1;HIPK1;BCAS2;CD2;ACP6;ENSA;S100A9;S100A8;ARHGEF2;LINC01133;PFDN2;CD247;PTGS2;PTPN7;LAX1;PPP1R15B;FCMR;PIGR;G0S2;ACBD3;KCNK1;OPN3;STON1;ANXA4;SH2D6;MAT2A;CD8A;MAP4K4;IL1B;IL1RN;RALB;HS6ST1;MMADHC;AGPS;SPATS2L;METTL21A;TMBIM1;SLC11A1;PID1;ITM2C;MLPH;GPR35;THUMPD3-AS1;CSRNP1;ZNF852;CD96;TIGIT;CSTA;ACPP;COPB2…	VWA1;TNFRSF9;FBXO6;PLOD1;CAMK2N1;WNT4;ZNF436-AS1;ID3;PAFAH2;RPS6KA1;PIGV;MAP3K6;PTAFR;TMEM200B;TINAGL1;COL16A1;EVA1B;ZC3H12A;DNALI1;COL9A2;CITED4;B4GALT2;SLC6A9;FOXD2;PLPP3;NFIA;WDR78;DDAH1;CYR61;LINC01140;GBP1;GBP2;ARHGAP29;GSTM5;KCNC4;KCND3;AC245014.3;BOLA1;C1orf54;TNFAIP8L2;SELENBP1;S100A16;AQP10;PAQR6;NTRK1;TSTD1;ARHGAP30;FCER1G;RGS5;GPR161;DPT;RASAL2;HMCN1;RGS13;CAMSAP2;PPP1R12B;FMOD;LAX1;CD…	FNDC10;SMIM1;GPR153;ACOT7;TNFRSF1B;PADI2;PADI4;ALDH4A1;HSPG2;CLIC4;SLC30A2;PTAFR;LCK;FHL3;MFSD2A;COL9A2;SPATA6;AC099791.2;PDE4B;SAMD13;GBP5;EVI5;CELSR2;SORT1;CTTNBP2NL;CD2;NUDT17;AL391069.3;SHE;PAQR6;LY9;FCER1G;TADA1;CD247;XCL2;XCL1;RASAL2;KIAA1614;GLUL;PTGS2;AL390957.1;RGS13;PTPRC;NAV1;SHISA4;SOX13;RHEX;FCMR;AC092803.2;DISP1;SMYD3;LINC01871;FAM49A;RMDN2;HAAO;ZFP36L2;TGFA;EXOC6B;BOLA3-AS1;HK2;GNL…	TNFRSF18;AL139246.5;ACOT7;HSPB7;CAMK2N1;ZNF436-AS1;ID3;SLC30A2;TMEM200B;TINAGL1;ZBTB8A;KIAA1522;GJA4;COL9A2;PTPRF;ARTN;B4GALT2;SLC6A9;CYP4X1;FOXD2;TCTEX1D1;WDR78;NEXN;CYR61;GBP1;BCAR3;ARHGAP29;SNX7;GSTM5;KCNC4;DENND2D;C1orf162;AC245595.1;NUDT17;GJA5;PDE4DIP;C1orf54;CTSK;SELENBP1;NTRK1;CD48;FCER1G;RGS5;RASAL2;RGS16;AL390957.1;AL136987.1;RGS1;CAMSAP2;LMOD1;PTPN7;PPP1R12B;LAX1;CDK18;SLC45A3;RASSF5;G…
DC	0	0	0	0	TNFRSF18;VWA1;PLEKHG5;PIK3CD;PEX14;PINK1;HSPG2;C1QA;C1QC;C1QB;FAM110D;SYTL1;TINAGL1;FAM167B;KDM4A;SHISAL2A;PLPP3;LEPR;ADGRL4;TGFBR3;ARHGAP29;CNN3;PALMD;S1PR1;KIAA1324;STRIP1;C1orf162;PHTF1;TXNIP;TCHH;NES;ACKR1;FCER1A;CD48;ARHGAP30;USP21;FCER1G;FCGR3A;RCSD1;XCL1;SELP;SELE;DNM3;RGS1;ZNF281;CAMSAP2;PIK3C2B;DSTYK;IKBKE;CD34;PLXNA2;G0S2;PTPN14;HLX;CCSAP;FAM89A;KMO;AKT3;ZNF496;NLRP3;TRIB2;CCDC121;CRIM1…	MEGF6;UTS2;TNFRSF9;SFN;FGR;CSF3R;AL050341.2;TESK2;IPP;TTC22;ADGRL2;TTLL7;MCOLN2;VCAM1;CELSR2;ADORA3;OLFML3;FCGR1B;FCGR1A;S100A2;S100A14;EFNA4;CD1D;ACKR1;SLAMF7;OLFML2B;RCSD1;SELP;RGS18;LINC01353;PIGR;CR1;BATF3;KMO;NLRP3;ZNF692;SDC1;ZNF512;RASGRP3;PLEK;LOXL3;TRABD2A;ADRA2B;IL1R2;PTPN4;KYNU;ZEB2-AS1;TNFAIP6;CYTIP;DAPL1;STAT4;MYO1B;CARF;KANSL1L;DOCK10;SP140;GPR35;AC026202.2;FGD5;RFTN1;OSBPL10;VILL;C…	UBE2J2;LRRC47;CTNNBIP1;AGTRAP;TNFRSF1B;FBLIM1;TMCO4;C1QA;TCEA3;CD52;RPS6KA1;LAPTM5;MARCKSL1;ZC3H12A;PABPC4;RLF;PRKACB;MCOLN2;CD53;DRAM2;PTPN22;CD58;SRGAP2C;AC245014.3;PDE4DIP;C1orf54;CTSS;CTSK;CREB3L4;UBAP2L;IL6R;SLC50A1;SEMA4A;TMEM79;CD48;SLAMF7;TSTD1;ARHGAP30;FCGR2A;UHMK1;XCL1;TOR3A;STX6;RGS1;RGS2;RAB29;RAB7B;PIGR;G0S2;DUSP10;RAB4A;CCSAP;OPN3;CHML;HPCAL1;ODC1;PTRHD1;SLC8A1;CCDC88A;CNRIP1;ARHGAP…	MMEL1;PLEKHG5;OTUD3;CDC42;C1QA;ASAP3;FAM110D;YBX1;IPP;RAB3B;RRNAD1;FCER1G;RGS1;BTG2;ID2;SELENOI;CALM2;ARPC2;RHOA;PROS1;AC083798.2;CCNL1;TBCCD1;MUC20;RPL9;LINC02469;PCAT4;AC093827.4;CYP2U1;C5orf38;MYO10;RANBP3L;RPL37;ELOVL7;EIF4EBP3;EBF1;NPM1;HIST1H2BD;HIST1H4J;ZKSCAN8;HLA-A;HLA-E;APOM;HSPA1B;TAF8;RIMS1;PNRC1;EPHA7;TRAF3IP2-AS1;TRAF3IP2;RGS17;ACTB;NCAPG2;SAT1;TIMP1;GPKOW;EDA;TMSB15A;CEBPD;UQCRB;FA…	ENO1;TNFRSF1B;ATP5IF1;LAPTM5;NDUFS5;ATP6V0B;UQCRH;GNG5;S1PR1;PHTF1;PLEKHO1;MCL1;CTSS;JTB;SSR2;ETV3;CD48;FCER1G;ATP1B1;PTPRC;H3F3A;OST4;PPP1CB;RTN4;REL;NAGK;MOB1A;CAPG;DUSP2;LIMS1;ACTR3;DBI;CXCR4;ZEB2;RND3;PLA2R1;ATP5MC3;HOXD8;TFPI;SF3B1;BZW1;CFLAR;XRCC5;ARPC2;BHLHE40;BRK1;SELENOK;CCDC80;COX17;HCLS1;HEG1;PLSCR4;SERP1;TIPARP;SKIL;AP2M1;TFRC;LAP3;RBM47;OCIAD1;CXCL2;RASGEF1B;HNRNPDL;EIF4E;ANXA5;FNIP2…	GPR157;PHTF1;S100A9;AL138899.1;CD1E;TOMM40L;XCL1;SELL;AC104794.2;AC110769.2;CALCRL;CARF;KANSL1L;DNASE1L3;PLA1A;LAMP3;MUC4;CEP135;HOPX;HERC5;HLA-DOB;SYTL3;CCR6;ERV3-1;HIP1;TMEM140;ANOS1;EDA;PI15;CPSF1;BNC2;TSC1;SCGB1A1;MMP12;SLC37A2;IL2RA;TIMM23B;ZCCHC24;MXI1;AC091814.1;FAR2;SAMD4A;AC025580.2;GLCE;MT1M;MT1G;RRAD;SLC7A6OS;HIC1;CCL2;EPOP;POLI;MLLT1;SPIB;LILRB5;RABL2B	VWA1;PADI4;ZBTB40;PDIK1L;AL136115.2;SH3D21;MTF1;ARMH1;GNG12;NBPF10;FMO5;NBPF14;NBPF9;MTMR11;S100A9;S100A4;CD244;TOMM40L;ZNF281;CD55;AC104794.2;ZNF512;CYP1B1;HAAO;TTC7A;AC062029.1;TBC1D8;SESTD1;KANSL1L;SLC11A1;HDAC4;CX3CR1;EIF4E3;CCDC58;CHST13;TIPARP-AS1;IGF2BP2;CEP135;CXCL3;EREG;PAQR3;SLC10A7;TMEM154;SKP2;ERCC8;S100Z;TMEM170B;MAPK14;PAQR8;AK9;TRAF3IP2-AS1;TPD52L1;VNN2;SUMO4;ZNF12;HIP1;ZNF3;ZCWPW1…	PADI4;IFI6;MARCKSL1;GADD45A;HENMT1;PHTF1;AC245014.3;PLEKHO1;S100A9;FCGR3A;FCGR2B;ATP1B1;SELL;PACERR;PDIA6;SLC8A1;VAMP5;IL18R1;IL18RAP;SLC20A1;HS6ST1;DHRS9;STAT1;SLC11A1;DOCK10;HDAC4;ALCAM;CD86;HEG1;ACPP;CPA3;TNIK;TBL1XR1;BST1;LAP3;CEP135;SPARCL1;GPRIN3;SLC10A7;TMEM154;RAPGEF2;MIR3945HG;ANKH;IL7R;ANXA2R;AK6;HEXB;GM2A;ITK;PXDC1;HLA-DRB5;HLA-DQA1;HLA-DQB1;HLA-DMB;HLA-DMA;CUL7;CD164;VNN3;UTRN;CPVL;IN…	SLC35E2A;GPR157;LCK;ERMAP;SNX7;CDC14A;SORT1;CTTNBP2NL;PHTF1;OLFML3;PHGDH;C1orf54;TCHH;TMEM79;CD1D;PYHIN1;SLAMF8;CD244;FCGR2B;XCL1;SLC19A2;STX6;RGL1;RGS18;IRF6;LINC00467;AC092803.2;BATF3;BPNT1;GPR137B;OPN3;MBOAT2;SLC8A1;AC017083.1;LOXL3;RETSAT;GNLY;IL1R2;IL1R1;IL18RAP;HS6ST1;NCKAP5;HNMT;DPP4;GCA;SLC40A1;STAT4;RAPH1;PID1;SH3BP4;CAMK1;IL17RC;GHRL;CXCR6;CACNA2D3;ALCAM;CD96;TIGIT;ARHGAP31;ADPRH;CSTA;P…	CAMK2N1;ID3;CNKSR1;AL050341.2;GADD45A;CDC14A;HENMT1;CD58;FMO5;S100A9;CD1C;IFI16;LINC01133;SELL;AL136987.1;RGS13;CD207;AC133644.2;PTPN4;MZT2A;RBM45;ZNF852;FILIP1L;TIGIT;ACPP;MFSD1;TFRC;ZFYVE28;DTHD1;TET2;FNIP2;SKP2;DAB2;SELENOP;ANXA2R;TGFBI;NRG2;ITK;HLA-DQB2;TREM2;POLH;VEGFA;PLA2G7;HSF2;SAMD3;MICALL2;TMEM176A;INSIG1;DNAJB6;SLC31A1;IER5L;NRARP;TPP1;CCND1;ANO1;PAK1;MMP7;BCL9L;TMEM45B;PRKCQ;OTUD1;TIM…	SAMD11;LINC01759;FBXO2;PDPN;CROCC;CAMK2N1;ZBTB40;C1QC;PDIK1L;RPS6KA1;PIGV;SYTL1;THEMIS2;PTAFR;TINAGL1;ZMYM1;NCDN;CSF3R;AL050341.2;IPO13;TESK2;TSPAN1;ZFYVE9;PLPP3;PRKAA2;NFIA;PDE4B;CDC7;TGFBR3;CNN3;EXTL2;GSTM2;SLC16A4;LRIG2;MAGI3;PHTF1;AC245014.3;PRKAB2;BCL9;OTUD7B;TNFAIP8L2;LYSMD1;EFNA4;SYT11;F11R;RGS5;KIAA0040;KIAA1614;RNASEL;RGS18;MIR181A1HG;ELF3;FMOD;NUAK2;RAB7B;RASSF5;PIGR;UTP25;OPN3;AKT3;ZNF…	FNDC10;SLC2A5;GPR157;TMEM51;PADI2;CAMK2N1;ZBTB40;C1QA;C1QC;C1QB;CLIC4;PTAFR;LCK;ZBTB8A;COL8A2;FHL3;MYCL;TMEM125;SPATA6;CYB5RL;DHCR24;DIRAS3;BCAR3;AL365361.1;CTTNBP2NL;CD2;FCGR1B;FCGR1A;C1orf54;AL391069.3;NES;PYHIN1;SLAMF8;PEA15;SLAMF1;SELP;FMO4;RASAL2;NPL;NCF2;RGL1;NAV1;RAB7B;AC092803.2;BATF3;KCTD3;MARC2;DISP1;FAM49A;RASGRP3;RMDN2;SLC8A1-AS1;ANTXR1;HK2;GNLY;ZAP70;IL1B;NCKAP5;ZEB2-AS1;FMNL2;ITGB6;…	KCNAB2;PEX14;CROCC;OTUD3;CAMK2N1;ZBTB40;C1QA;C1QC;C1QB;PIGV;THEMIS2;LAPTM5;TINAGL1;IPO13;IPP;TSPAN1;PLPP3;PRKAA2;TTLL7;LPAR3;CDC7;TGFBR3;VAV3;KIAA1324;STRIP1;SLC16A4;CD53;DENND2D;MAGI3;OTUD7B;CTSS;CTSK;TCHH;THBS3;SYT11;ARHGAP30;FCER1G;FCGR2A;FCGR3A;RGS5;KIAA0040;NCF2;AL136987.1;RGS1;MIR181A1HG;ELF3;SLC45A3;RASSF5;UTP25;DUSP10;COG2;AKT3;NLRP3;ZNF692;PXDN;AC104794.2;GREB1;TRIB2;AC016730.1;ZNF512;CC…
Endothelial_cells	0	0	0	0	0	PERM1;TNFRSF4;SLC45A1;FBXO2;TNFRSF1B;ARHGEF10L;PLA2G2A;ALPL;WNT4;SFN;FCN3;FGR;PTAFR;AC119674.2;TACSTD2;SGIP1;ST6GALNAC3;LRRC8C;EPHX4;SLC44A3;VCAM1;S1PR1;CELSR2;AL365361.1;FAM72B;SRGAP2B;NBPF10;SEMA6C;NPR1;NUP210L;SHE;SYT11;PEAR1;CD1D;CADM3;ACKR1;ADAMTS4;AL359541.1;FAM78B;ATP1B1;SELE;SEC16B;HMCN1;MIR181A1HG;ELF3;PCAT6;NFASC;FAM72A;CD34;HLX;RYR2;CHRM3;AL390860.1;AC108488.1;MATN3;SDC1;KIF3C;KRTCAP3;…	ISG15;TNFRSF4;UBE2J2;CPTP;VWA1;PEX10;TNFRSF14;LRRC47;ICMT;CAMTA1;CTNNBIP1;RBP7;PEX14;CASZ1;AGTRAP;PLOD1;TNFRSF1B;DHRS3;DNAJC16;EPHA2;SDHB;ARHGEF10L;DDOST;EIF4G3;ECE1;HSPG2;ZBTB40;TCEA3;SELENON;WDTC1;MAP3K6;AHDC1;IFI6;YTHDF2;LAPTM5;SNRNP40;PEF1;FAM167B;MARCKSL1;YARS;SMIM12;AGO1;TRAPPC3;STK40;RLF;CITED4;FOXJ3;KDM4A;NASP;GPBP1L1;TMEM69;ZFYVE9;MAGOH;CACHD1;GADD45A;RABGGTB;AC118549.1;DNAJB4;GIPC2;IFI4…	MMEL1;CDC42;C1QA;ID3;FAM110D;SFN;MARCKSL1;YBX1;UQCRH;PARS2;AC105277.1;HOOK1;JAK1;DNAJC6;LEPROT;SERBP1;RPL5;CNN3;KIAA1324;PIFO;RHOC;TXNIP;RAB25;ARHGAP30;FCER1G;LMOD1;BTG2;GUK1;RPS7;ID2;LAPTM4A;EPAS1;CALM2;RTN4;ZNF385B;BMPR2;XRCC5;RPL37A;ARPC2;NCL;GPC1;RHOA;FOXP1;MTRNR2L12;AC083798.2;CNBP;ERICH6;CCNL1;SEC62;TNFSF10;HES1;MUC20;CD38;RPL9;RBM47;NSUN7;CNGA1;PARM1;CCNI;LINC02469;PCAT4;HNRNPD;MGST2;C5orf…	SDF4;VWA1;GNB1;VAMP3;PARK7;ENO1;RBP7;TNFRSF1B;DHRS3;CDA;PINK1;DDOST;ECE1;HNRNPR;SRRM1;SYF2;RSRP1;TMEM50A;SELENON;FAM110D;WASF2;STX12;DNAJC8;ATP5IF1;FAM167B;THRAP3;NDUFS5;TIE1;ATP6V0B;ARMH1;UQCRH;TUT4;SCP2;MAGOH;TMEM59;PLPP3;NFIA;CACHD1;JAK1;LEPROT;MIER1;SERBP1;DNAJB4;IFI44L;GNG5;BCL10;ODF2L;GBP1;GBP4;LRRC8C;GNAI3;RAP1A;ATP1A1;RNF115;TXNIP;MCL1;S100A16;JTB;RAB13;SHC1;FDPS;SSR2;NES;DUSP23;PFDN2;NDU…	ANKRD65;VWA1;ATAD3C;TMEM201;PIK3CD;KIF17;HSPG2;C1QA;C1QC;C1QB;ZNF436;ASAP3;MAP3K6;LAPTM5;ZBTB8A;GJA4;TIE1;ZFYVE9;AC119674.2;RAVER2;LEPR;LPAR3;GBP5;PALMD;KCNC4;C1orf162;TMIGD3;DENND2C;ITGA10;NOTCH2NL;SV2A;CTSS;SEMA6C;S100A9;S100A8;S100A16;ATP8B2;MEX3A;PEAR1;ACKR1;CD48;FCER1G;FCGR3A;RCSD1;SELP;SELE;DNM3;HMCN1;RGS1;ATP2B4;SOX13;PIK3C2B;PLXNA2;SERTAD4;MARC2;TLR5;SNAP47;AL445524.1;PXDN;RNF144A;FNDC4;C…	HES5;PLEKHG5;PLA2G2A;C1QA;C1QC;C1QB;ZNF436;ASAP3;LAPTM5;AL136115.2;GJA4;COL8A2;PLPP3;GIPC2;EPHX4;AC105942.1;S1PR1;SLC16A4;C1orf162;TMIGD3;DENND2C;PTGFRN;NOTCH2;GJA5;NBPF19;SV2A;CTSS;S100A9;S100A8;S100A4;NPR1;PEAR1;KIRREL1;MNDA;FCER1A;CD48;FCER1G;FCGR3A;NOS1AP;DDR2;FAM78B;RCSD1;DNM3;KIAA1614;HMCN1;PTGS2;RGS18;RGS1;RGS2;PTPRC;IKBKE;G0S2;TRAF3IP3;MARK1;AL391832.3;RYR2;NLRP3;SNTG2;RNF144A;RN7SL832P;C…	ISG15;VWA1;CAMTA1-DT;UBXN10;CDA;ECE1;HNRNPR;SELENON;WASF2;IFI6;STX12;EIF3I;MARCKSL1;AK2;ZMYM4;COL8A2;MEAF6;UTP11;NASP;GPBP1L1;EFCAB14;BTF3L4;PLPP3;CACHD1;LEPROT;GADD45A;MIGA1;FUBP1;IFI44L;BCL10;ODF2L;SELENOF;FNBP1L;CNN3;S1PR1;SARS;PSRC1;C1orf162;RHOC;NOTCH2;SRGAP2C;NOTCH2NL;NBPF14;S100A9;S100A8;S100A16;S100A13;GATAD2B;SLC39A1;RAB13;SHC1;EFNA1;FDPS;GON4L;IFI16;DUSP23;PEA15;CD48;ARHGAP30;FCER1G;ATF…	AGRN;DVL1;ATAD3C;PEX10;PLEKHG5;PHF13;PER3;SLC45A1;GPR157;KIF1B;CASZ1;PLOD1;FBLIM1;EPHA2;NBPF1;CDA;ZNF436;TCEA3;ASAP3;PAQR7;PDIK1L;MAP3K6;FCN3;AHDC1;XKR8;SDC3;FAM167B;LCK;FAM229A;ZBTB8A;TMEM54;CSMD2;EVA1B;C1orf109;TRIT1;AL050341.2;P3H1;ARMH1;ZSWIM5;MMACHC;TRABD2B;BEND5;ZFYVE9;GPX7;LRP8;NDC1;CYB5RL;PLPP3;EFCAB7;CACHD1;SGIP1;WDR78;ST6GALNAC3;ADGRL2;LRRC8C-DT;LRRC8C;CDC7;FNBP1L;ARHGAP29;SNX7;KCNC4;CT…	SDF4;GNB1;UTS2;RBP7;ARHGEF10L;PINK1;DDOST;ECE1;C1QB;LUZP1;ID3;SYTL1;AL353622.1;PHACTR4;EIF3I;LCK;EVA1B;CITED4;PPCS;TMEM125;ARMH1;RNF11;NFIA;GADD45A;GNG12;MIGA1;DNAJB4;IFI44L;IFI44;ADGRL4;BCL10;CYR61;ODF2L;GBP4;TGFBR3;FNBP1L;ARHGAP29;PALMD;FRRS1;KCNC4;TMIGD3;NOTCH2;SRGAP2C;RNF115;NBPF10;NOTCH2NL;NBPF19;ENSA;S100A9;S100A8;S100A16;SHC1;ADAM15;EFNA1;MUC1;SH2D2A;PYHIN1;IFI16;LINC01133;PEA15;CD48;SLAMF…	FBXO2;PDPN;AL031283.2;MFAP2;ARHGEF10L;CAMK2N1;LDLRAD2;FCN3;FGR;COL16A1;FAM167B;PODN;HOOK1;TCTEX1D1;NEXN;GIPC2;NOTCH2;ITGA10;NOTCH2NL;GJA5;NBPF19;S100A4;NPR1;F11R;C1orf226;RGS5;UCK2;SELE;DNM3;MIR181A1HG;LMOD1;ETNK2;VASH2;HLX;AC104695.3;RASGRP3;PLEKHH2;MEIS1;ARHGAP25;ADD2;DYSF;CYP26B1;TACR1;AC007681.1;KIAA1211L;TBC1D8;TMEM182;C2orf40;MALL;INHBB;KYNU;ARHGAP15;ZEB2;LYPD6B;LY75;DPP4;CSRNP3;KLHL23;RAPG…	AGRN;VWA1;ATAD3C;MMP23B;GABRD;MMEL1;NPHP4;PLEKHG5;PHF13;VAMP3;PER3;TMEM201;C1orf167;PLOD1;TMEM51;AL031283.2;CDA;KIF17;ALPL;ZNF436;AL031280.1;SDC3;ZBTB8A;KIAA1522;CSMD2;OSCP1;MFSD2A;B4GALT2;LURAP1;TAL1;SPATA6;BEND5;SHISAL2A;NDC1;CYB5RL;CACHD1;RAVER2;ST6GALNAC3;ADGRL2;EPHX4;EVI5;FNBP1L;BCAR3;ALG14;SNX7;SORT1;SLC16A4;CHI3L2;CTTNBP2NL;WNT2B;DENND2C;PTGFRN;FAM72B;FAM72D;ITGA10;MTMR11;MINDY1;SEMA6C;AL3…	ATAD3C;AL139246.5;TMEM51;AL031283.2;CAMK2N1;KIF17;ALPL;FGR;PTAFR;TMEM200B;CSMD2;MFSD2A;PRKAA2;PTGER3;ST6GALNAC3;NEXN;ADGRL4;TTLL7;FAM69A;S1PR1;VAV3;PSRC1;NOTCH2;S100A4;S100A3;NPR1;CD1D;ACKR1;RGS5;RCSD1;SELE;DNM3;LMOD1;MFSD4A;CD34;RHOU;KIF26B;GREB1;OSR1;EFR3B;RASGRP3;HAAO;ARHGAP25;VAX2;LOXL3;AC007681.1;IL18R1;C2orf40;SULT1C2;MALL;ARHGAP15;LYPD6B;KLHL23;ITGA6;RAPGEF4;HOXD8;LINC01116;OSBPL6;FRZB;COL…
Epithelial_cells	0	0	0	0	0	0	UBE2J2;MXRA8;PEX10;ARHGEF16;LRRC47;CAMTA1;CLSTN1;CTNNBIP1;CASZ1;MTOR;AGTRAP;DHRS3;DNAJC16;DDI2;HSPB7;EPHA2;SDHB;ALDH4A1;TMCO4;DDOST;ECE1;TCEA3;HMGCL;FUCA1;NIPAL3;RCAN3;LDLRAP1;RPS6KA1;SYTL1;YTHDF2;SNRNP40;MARCKSL1;TMEM54;AGO1;TRAPPC3;ZC3H12A;HEYL;RLF;CITED4;FOXJ3;POMGNT1;RAB3B;YIPF1;LRRC42;HOOK1;PATJ;GADD45A;WLS;AC118549.1;PTGFR;PRKACB;RPF1;CTBS;LPAR3;DDAH1;ABCD3;PALMD;AGL;TRMT13;VCAM1;SORT1;DRAM…	PLEKHG5;ID3;FAM110D;HMGN2;ATP5IF1;YBX1;UQCRH;AC105277.1;DNAJC6;SERBP1;RPL5;TXNIP;ATP1B1;BTG2;SLC45A3;LAPTM4A;CALM2;RTN4;AC017083.1;POTEJ;AC008063.1;ATP5MC3;RPL37A;ARPC2;NCL;TGM4;SEMA3B-AS1;FOXP1;MTRNR2L12;CCNL1;SEC62;TNFSF10;HES1;ATP5ME;RPL9;RPL37;CSNK1A1;EBF1;NPM1;HLA-A;HLA-E;HSPA1A;HSPA1B;LRRC73;RIMS1;PNRC1;AMD1;PERP;ACTB;CLDN4;HSPB1;TIMP1;NDUFA1;SARAF;CEBPD;UQCRB;DNAJA1;HSPA5;KYAT1;RPLP2;CD81;…	PARK7;ENO1;AGTRAP;DHRS3;NBL1;HNRNPR;RCAN3;SRRM1;SYF2;RSRP1;TMEM50A;FAM110D;DNAJC8;ATP5IF1;FAM167B;THRAP3;MEAF6;NDUFS5;TIE1;ATP6V0B;ARMH1;UQCRH;SCP2;TMEM59;GNG5;ATP1A1;JTB;SSR2;NES;PEAR1;TSTD1;PBX1;MGST3;ATP1B1;PRDX6;AL513217.1;SNRPE;SLC45A3;CD46;NENF;PROX1;HLX;MIA3;H3F3A;TOMM20;YWHAQ;HADHA;OST4;PPP1CB;AL121658.1;EPCAM;RTN4;CCDC85A;GPAT2;DUSP2;SULT1C4;DBI;LIMS2;UBXN4;PRPF40A;NOSTRIN;SSB;ATP5MC3;CA…	ANKRD65;VWA1;HES2;PIK3CD;ASAP3;PIGV;KDF1;DNALI1;TMEM125;C1orf210;TIE1;CYP4X1;ZFYVE9;CYP2J2;LINC01748;RAVER2;GBP5;SLC44A3;PALMD;CELSR2;PIFO;DENND2C;FAM72B;FAM72D;ACP6;CTSS;SELENBP1;CGN;TUFT1;S100A16;S100A14;MUC1;CD1D;LINC01133;VANGL2;SLAMF7;NECTIN4;PCP4L1;SELP;SELL;NPL;INAVA;FMOD;PLEKHA6;SERTAD4;DISP1;KCNK1;VSNL1;SELENOI;PLEK;DOK1;IL1R2;FHL2;NPHP1;PAX8;POTEI;CCDC74A;CXCR4;NEB;GALNT5;DPP4;CASP10;UN…	RNF223;TNFRSF9;PIK3CD;FBXO2;PDPN;MFAP2;SH3BGRL3;CD52;TENT5B;CD164L2;THEMIS2;PTPRU;LAPTM5;GJB5;GJB3;CSF3R;FHL3;RHBDL2;ARMH1;BTBD19;LINC01748;AL583808.1;ST6GALNAC3;LINC01725;SYDE2;CLCA4;NTNG1;AL160006.1;CD53;C1orf162;IGSF3;CD101;PLEKHO1;CTSS;S100A9;S100A8;S100A4;S100A2;MNDA;FCER1A;LINC01133;CD48;SLAMF7;FCER1G;PCP4L1;NOS1AP;RCSD1;TBX19;SELL;LAMC2;PTGS2;PLA2G4A;RGS18;RGS1;RGS2;PTPRC;INAVA;LAD1;LGR6;G…	CAMTA1-DT;CLSTN1;DHRS3;AKR7A2;UBXN10;HNRNPR;TRIM63;FGR;THEMIS2;MARCKSL1;AK2;AC004865.2;MEAF6;BTF3L4;ECHDC2;GADD45A;FUBP1;BCL10;FNBP1L;SARS;RHOC;HIPK1-AS1;S100A9;S100A8;S100A16;S100A13;AL358472.5;RAB13;EFNA1;SYT11;GLMP;AL365181.1;NTRK1;CD1D;CFAP45;ATP1A4;CD48;TSTD1;FCGR2B;AL359541.1;RCSD1;MPC2;ATP1B1;SELL;DHX9;RGS18;AL390957.1;HLX;MIA3;DEGS1;ENAH;EPHX1;ACBD3;ITPKB-AS1;SCCPDH;NLRP3;ODC1;PDIA6;RHOB;…	PERM1;AGRN;AL390719.2;AL691432.2;PEX10;MMEL1;ARHGEF16;MEGF6;HES2;PHF13;AL034417.3;RBP7;KAZN;TMEM51;EPHA2;ARHGEF10L;ZNF436-AS1;IFNLR1;STPG1;RHCE;PAQR7;PDIK1L;CNKSR1;KDF1;TRNP1;CD164L2;PTPRU;ZBTB8A;TMEM54;SH3D21;OSCP1;RHBDL2;RIMKLA;FAM183A;C1orf210;CCDC24;ZSWIM5;LURAP1;CYP4X1;PDZK1IP1;ZFYVE9;TTC22;PRKAA2;CYP2J2;LINC01748;CACHD1;LPAR3;CLCA2;CLCA4;FNBP1L;SLC44A3;TMEM56;SNX7;FRRS1;PRMT6;NTNG1;CELSR2;P…	SDF4;SCNN1D;UTS2;ERRFI1;PADI4;NBL1;PLA2G2A;DDOST;ID3;SFN;FGR;PTAFR;TMEM54;CSF3R;CITED4;PPCS;PTPRF;ARMH1;TSPAN1;FAAH;SHISAL2A;DHCR24;NFIA;GADD45A;AK5;MCOLN2;MCOLN3;BCL10;CYR61;FNBP1L;KIAA1324;ADORA3;FCGR1A;S100A16;S100A1;EFNA1;GLMP;SH2D2A;PYHIN1;NDUFS2;OLFML2B;RCSD1;SELL;AL449106.1;HMCN1;RGS18;IL10;ACBD3;RAB4A;ACP1;ADI1;FAM84A;AC079148.1;RASGRP3;AC006369.1;SLC8A1;ERLEC1;PLEK;LOXL3;TRABD2A;CD8A;AC1…	PERM1;PRKCZ;MMEL1;MEGF6;TP73;HES2;AL034417.3;SLC45A1;SLC2A5;RBP7;HSPB7;RAP1GAP;NIPAL3;SERINC2;TSSK3;GJB3;GJA4;ZC3H12A;RHBDL2;RIMS3;EDN2;TSPAN1;CYP4B1;TTC39A;RAB3B;DHCR24;FYB2;AK4;PDE4B;LPAR3;CDC7;FRRS1;GSTM5;HMGCS2;GJA5;HIST2H2BE;ECM1;FALEC;RORC;S100A4;S100A2;S100A14;MUC1;SH2D2A;LINC01133;F11R;DDR2;RGS5;UCK2;RCSD1;DPT;KIAA1614;INAVA;LAD1;ELF3;NFASC;MFSD4A;FAM71A;BATF3;HLX;ATP6V1C2;KRTCAP3;TOGARAM…	PERM1;AGRN;RNF223;AL390719.2;MMEL1;ARHGEF16;SMIM1;HES2;PHF13;PIK3CD;RBP7;PLOD1;TMEM51;ALDH4A1;RAP1GAP;NCMAP;CNKSR1;CD52;ZNF683;KDF1;CD164L2;PTPRU;SDC3;SERINC2;ZBTB8B;KIAA1522;OSCP1;RHBDL2;FOXO6;FAM183A;TMEM125;C1orf210;B4GALT2;CCDC24;HPDL;LURAP1;CYP4X1;PDZK1IP1;FOXD2;TTC39A;AC104170.1;SHISAL2A;ACOT11;FYB2;LINC01748;CACHD1;DIRAS3;ADGRL2;LINC01725;DNASE2B;LPAR3;SYDE2;DDAH1;GBP5;GFI1;EVI5;BCAR3;F3;A…	AL645608.8;TNFRSF18;PLCH2;MMEL1;TP73;HES2;ESPN;AL034417.3;SLC45A1;RAP1GAP;SERINC2;TINAGL1;ZBTB8B;KIAA1522;GJB3;GJA4;KCNQ4;FAM183A;TSPAN1;FAAH;CYP4B1;PDZK1IP1;TTC39A;RAB3B;TTC22;TMEM61;HOOK1;LINC01748;NEXN;CLCA2;LRRC8C;CDC7;NTNG1;VAV3;DENND2D;MAB21L3;VTCN1;BNIPL;CGN;RORC;S100A4;S100A2;RAB25;AL365181.4;IGSF9;LINC01133;ARHGAP30;RGS5;RCSD1;F5;LAMC2;ATP6V1G3;INAVA;IPO9-AS1;PLEKHA6;NFASC;MFSD4A;C1orf11…
Fibroblasts	0	0	0	0	0	0	0	UBE2J2;PUSL1;AGTRAP;CASP9;EPHA2;C1QA;YARS;STK40;TMEM69;HOOK1;PDE4DIP;CREB3L4;SLC50A1;SEMA4A;TSTD1;ARHGAP30;EIF2D;RAB4A;COA6;PTRHD1;KRTCAP3;GMCL1;PAIP2B;C2orf68;THNSL2;COA5;RALB;ARL6IP6;ZNF385B;BARD1;IGFBP5;PASK;HACL1;THRB;GPD1L;SLC25A38;ENTPD3-AS1;SEC22C;ACPP;DNAJC13;GYG1;MME;MUC20;CCDC149;STIM2;RBM47;PCAT4;AC093827.4;AP001816.1;CYP2U1;CASP6;GAR1;AGA;MYO10;PRKAA1;PART1;ELOVL7;SERINC5;DELE1;SLC36A…	NBL1;FAM167B;ALG6;CTSS;ADAM15;UHMK1;RASAL2;LGALS8;ODC1;RNF103;INSIG2;ZEB2;ITGA6;CALCRL;INPP1;IGFBP5;RAD18;C3orf62;HEG1;IFT122;ACPP;SLC35G2;PIK3CB;DHX15;CCDC149;ARAP2;FAM241A;ANXA5;DDX60;AC025181.2;NR2F1;CD74;DSP;HLA-DRB5;HLA-DRB1;HLA-DPA1;CYP39A1;GJA1;FSCN1;ICA1;THSD7A;URGCP;SEMA3A;SLC37A3;ARSD;AP1S2;GRIPAP1;AIFM1;ARMC1;FZD6;DAB2IP;RALGDS;PTGDS;C11orf96;USP6NL;MMRN2;EXOC6;VWF;C1R;GRASP;CPM;DCN;LP…	UBE2J2;TNFRSF14;PGD;AGTRAP;PLOD1;TNFRSF1B;WNT4;C1QA;RPL11;FUCA1;SH3BGRL3;CD52;LAPTM5;MARCKSL1;PABPC4;ATP6V0B;PRDX1;MKNK1;LEPR;SGIP1;WLS;PRKACB;CTBS;GBP5;DNTTIP2;DPYD;CD53;DRAM2;ST7L;CD58;SRGAP2C;AC245014.3;PDE4DIP;VPS45;CTSS;S100A11;S100A9;RPS27;IL6R;KIRREL1;CD48;SLAMF7;TSTD1;FCGR2A;ATF6;RCSD1;CACYBP;SOAT1;GLUL;RGL1;RNF2;IVNS1ABP;RGS1;RGS2;PTPRC;DDX59;NAV1;ADIPOR1;PRELP;PPP1R15B;RBBP5;RAB29;SRGAP…	SAMD11;ISG15;UBE2J2;VWA1;NADK;TNFRSF14;RPL22;CAMTA1;ENO1;RBP7;PGD;AGTRAP;TNFRSF1B;EFHD2;SDHB;RCC2;DDOST;EIF4G3;CDC42;WNT4;C1QA;RPL11;SRRM1;SH3BGRL3;CD52;RPS6KA1;WDTC1;TAF12;AL360012.1;YTHDF2;EPB41;LAPTM5;TINAGL1;MARCKSL1;YARS;SMIM12;AGO1;TRAPPC3;LSM10;MRPS15;ZC3H12A;FHL3;PABPC4;CAP1;PPT1;RLF;YBX1;ELOVL1;ATP6V0B;RPS8;PRDX1;TMEM69;UQCRH;MKNK1;MAGOH;PDE4B;SERBP1;GNG12;RABGGTB;PRKACB;RPF1;GNG5;CTBS;C…	CD52;LAPTM5;RLF;DNTTIP2;CD53;NOTCH2;CTSS;S100A9;IL6R;SEMA4A;CD48;GLUL;RGS1;RGS2;G0S2;DUSP10;WDR26;BABAM2;MXD1;HK2;CAPG;VAMP8;USP39;DUSP2;RNF149;IL18R1;CXCR4;ARHGAP15;MBD5;GCA;GALNT3;NABP1;EIF4E2;MLPH;MYD88;OXSR1;ABHD5;SELENOK;EBLN2;CSTA;GATA2;GYG1;SERP1;RARRES1;ATP13A3;C4orf48;DHX15;STIM2;KIT;IGFBP7;CXCL1;RASGEF1B;PLAC8;SPARCL1;DAPP1;NFKB1;TET2;C4orf33;TMEM154;RAPGEF2;CPE;ACSL1;PRKAA1;HMGCS1;EMB;…	SAMD11;TNFRSF1B;CAMK2N1;WNT4;CD52;LAPTM5;COL16A1;LCK;PLPP3;ADGRL2;CYR61;SNX7;CD53;SLC16A1-AS1;PTPN22;OLFML3;TENT5C;AC245014.3;AC245297.3;CTSS;CTSK;KIRREL1;CD48;ADAMTS4;CD247;XCL2;XCL1;FASLG;RGS1;RGS2;PTPRC;PTPN7;TRAF3IP3;RYR2;LINC01871;LTBP1;CYP1B1;PLEKHH2;MEIS1;MOB1A;CAPG;VAMP8;GNLY;CD8A;DUSP2;FHL2;CXCR4;HNMT;MBD5;RND3;CYTIP;KLHL23;FKBP7;FRZB;STAT4;NABP1;CASP8;TUBA4A;PID1;EFHD1;ACKR3;COL6A3;SNED…	AGTRAP;MIIP;NBL1;C1QA;CD52;XKR8;LAPTM5;CYR61;TRMT13;SORT1;CD53;DENND2D;NOTCH2;CTSS;S100A9;CREB3L4;CD48;ARHGAP30;CD247;XCL2;RGS1;RGS2;DDX59;ELF3;RAB29;PIGR;G0S2;LINC01871;ODC1;CAPG;VAMP8;GNLY;CD8A;CD8B;INPP4A;INSIG2;BIN1;CXCR4;ARHGAP15;CYTIP;IGFBP2;DOCK10;SP140;ANKRD28;ENTPD3-AS1;FLNB;RPP14;FILIP1L;ISY1;CEP63;ZNF639;ST6GAL1;MUC4;S100P;ARAP2;GNPDA2;OCIAD2;RASGEF1B;PLAC8;MCUB;ACSL1;IL7R;FYB1;PRKAA1;…	HES4;ISG15;UBE2J2;CPTP;WRAP73;LRRC47;RPL22;CAMTA1;PARK7;LZIC;KIF1B;MTOR;MFAP2;SDHB;CAMK2N1;DDOST;EIF4G3;ECE1;ZBTB40;ID3;RPL11;AHDC1;IFI6;TRNAU1AP;YTHDF2;SNRNP40;PEF1;MARCKSL1;SMIM12;TRAPPC3;MRPS15;FHL3;CITED4;CCDC30;YBX1;RPS8;UROD;PRDX1;GPBP1L1;RNF11;ZFYVE9;TUT4;MAGOH;LRRC42;GADD45A;WLS;RABGGTB;NEXN;SSX2IP;ZNF326;RPL5;DNTTIP2;DPYD;SLC25A24;SORT1;CSF1;ATP5PB;DDX20;SIKE1;WDR3;NOTCH2;SEC22B;LINC0062…	ISG15;AGTRAP;TNFRSF1B;HSPB7;RPL11;RCAN3;CLIC4;SH3BGRL3;CD52;EPB41;TMEM200B;LAPTM5;TINAGL1;COL16A1;LCK;ZBTB8A;B4GALT2;SPATA6;PRKACB;AC092807.3;GBP5;DNTTIP2;CD53;DENND2D;PTPN22;CD2;TENT5C;LINC00623;AC245014.3;AC245297.3;CIART;CTSS;CTSK;RPS27;NES;CD48;TSTD1;ARHGAP30;CD247;RCSD1;XCL2;XCL1;PRRX1;DNM3OS;FASLG;RABGAP1L;LAMC1;RGS1;RGS2;PTPRC;LMOD1;PTPN7;FMOD;PRELP;RAB7B;PFKFB2;TRAF3IP3;SERTAD4;DNAH14;NID…	HES4;ISG15;LRRC47;RPL22;ICMT;DNAJC11;CAMTA1;PARK7;LZIC;MTOR;MIIP;KAZN;TMEM51;EPHA2;SDHB;CAMK2N1;EIF4G3;ECE1;ZBTB40;ID3;RPL11;AHDC1;YTHDF2;SNRNP40;ZCCHC17;TINAGL1;MARCKSL1;YARS;SMIM12;AGO1;TRAPPC3;MRPS15;CITED4;FOXJ3;YBX1;RPS8;UROD;MUTYH;PRDX1;GPBP1L1;ZFYVE9;MAGOH;LRRC42;JUN;GADD45A;PIGK;AC118549.1;NEXN;TTLL7;PRKACB;RPF1;GTF2B;RPL5;BCAR3;DNTTIP2;TRMT13;SLC25A24;SORT1;CSF1;STRIP1;LRIF1;DRAM2;ATP5PB…
Hepatocytes	0	0	0	0	0	0	0	0	DBI;NDUFB3;ANXA5;UQCRQ;HIST1H2AC;COL9A1;AZGP1;NKX3-1;ATP6V1G1;MALAT1;VIM;KRT8;KRT18;PEBP1;RDH11;MYDGF;PRDX2;ZFP36;KLK3;KLK2;NEFH;MT-CO1	EPHA2;CDC42;C1QA;ASAP3;RPL11;YBX1;DPH2;RPS8;PRDX1;IPP;JUN;AC105277.1;PIFO;TXNIP;S100A11;RPS27;KLHDC9;FCER1G;RGS1;BTG2;H3F3A;ID2;SELENOI;KRTCAP3;CALM2;RTN4;RPS27A;PCBP1;PAIP2B;VAMP8;DPP4;ARPC2;PTMA;GPC1;PASK;RPL32;RPL15;RPL14;ZNF197;RHOA;RPL29;LINC00960;RPL24;GATA2;CCNL1;MUC20;RPL35A;RPL9;NSUN7;CNGA1;SGCB;LINC02469;PCAT4;AC093827.4;RPL34;RPS3A;SNHG18;RPS23;EIF4EBP3;RPS14;CYFIP2;EBF1;NPM1;HIST1H4J;…	RPL22;ENO1;CDC42;C1QA;ASAP3;RPL11;SRRM1;RSRP1;FAM110D;HMGN2;PABPC4;PPT1;YBX1;RPS8;UQCRH;PARS2;JUN;SERBP1;GNG12;RPL5;TXNIP;S100A10;S100A11;RPS27;KLHDC9;FCER1G;RGS1;BTG2;PPP1R15B;H3F3A;RPS7;ID2;LAPTM4A;YPEL5;CALM2;RTN4;RPS27A;PCBP1;VAMP8;COX5B;RPL31;ATP5MC3;HSPD1;XRCC5;RPL37A;ARPC2;NCL;PTMA;RPL32;RPL15;CMTM6;RPL14;RHOA;RPL29;SELENOK;ARL6IP5;MTRNR2L12;RPL24;CNBP;SERP1;ERICH6;CCNL1;SEC62;HES1;RPL35A;…	RPL11;RPS27;FCER1G;BTG2;LAPTM4A;IL1R1;PTMA;RPL32;SELENOK;ACPP;RPL35A;RPL34;CPE;PAK1IP1;HIST1H2AC;HLA-A;EEF1A1;PNRC1;SAT1;RPL39;NKX3-1;RPL30;TMEM141;RPLP2;RPS13;FTH1;NEAT1;MALAT1;VIM;MSMB;KRT18;CD63;RPS26;TBX3;TPT1;NFKBIA;RPS29;RDH11;FOS;B2M;SORD;SLC30A4;MT1M;MT1G;CYBA;RPL23A;EIF1;H3F3B;CHMP1B;RPS21;GADD45B;HMG20B;MYDGF;RPL36;RPS28;JUNB;JUND;UBA52;ZFP36;FOSB;FTL;PTOV1;KLK2;RPL28;MT-ND1;MT-ND2;MT-C…	PLEKHG5;CASP9;EPHA2;ASAP3;FAM110D;SFN;DPH2;FAAH;RAB3B;PARS2;JUN;HOOK1;FNBP1L;PIFO;TXNIP;HIST2H2BE;RPS27;RGS1;BTG2;KCTD3;GNG4;ID2;SELENOI;AC092164.1;AC017083.1;MCEE;THNSL2;IL1R1;HNMT;TANC1;DPP4;COBLL1;ARPC2;PTMA;GPC1;PASK;RPL32;RPL14;SELENOK;ACPP;DNAJC13;MME;NAALADL2;P3H2;RPL35A;FAM114A1;NSUN7;SGCB;PARM1;PCAT4;AC093827.4;AP001816.1;NPNT;CYP2U1;RPL34;GUCY1A1;CPE;C5orf38;CMBL;RANBP3L;NLN;EIF4EBP3;SL…	YBX1;TXNIP;RPS27;FCER1G;IL1R1;PTMA;RPL32;RPL29;ACPP;MME;RPL35A;RPL34;HLA-A;HLA-E;HLA-C;HSPA1B;YIPF3;EEF1A1;PNRC1;ACTB;CALD1;TCEAL9;NKX3-1;UQCRB;RPL30;NDRG1;TMEM141;RPLP2;RPS13;FTH1;MALAT1;GSTP1;VSIG2;NCAPD3;VIM;MSMB;H2AFJ;RPS26;TPT1;ESD;SUCLA2;ABCC4;NFKBIA;RPS29;RDH11;CKB;B2M;SORD;MT1X;HSBP1;CYBA;PFN1;RPL23A;EIF1;CST3;RPS21;RPS28;JUNB;DNAJB1;JUND;ZFP36;FTL;KLK2;RPL28;NEFH;RPL3;MT-ND1;MT-ND2;MT-CO…	MMEL1;CDC42;ID3;RPL11;HMGN2;SFN;YBX1;RPS8;UQCRH;RAB3B;JUN;DNAJC6;LEPROT;SERBP1;RPL5;TXNIP;HIST2H2BE;RPS27;BTG2;H3F3A;GUK1;LAPTM4A;KRTCAP3;EPAS1;CALM2;RTN4;RPS27A;RPL31;DPP4;ATP5MC3;XRCC5;RPL37A;IGFBP2;IGFBP5;ARPC2;NCL;PTMA;RPL32;RPL15;RPL14;RHOA;SEMA3B-AS1;RPL29;ARL6IP5;MTRNR2L12;RPL24;GOLGB1;CNBP;ACPP;CCNL1;SEC62;HES1;RPL35A;ATP5ME;CD38;RPL9;RBM47;CCNI;LINC02469;HNRNPD;RPL34;RPS3A;GUCY1A1;CPE;RP…	MMEL1;PLEKHG5;EPHA2;C1QA;RPL11;FAM110D;SFN;FAAH;RAB3B;PARS2;DHCR24;JUN;DNAJC6;GNG12;PIFO;TXNIP;HIST2H2BE;RPS27;RAB25;RALGPS2;RGS1;BTG2;KCTD3;GNG4;ID2;DYNC2LI1;RPS27A;IL1R1;HNMT;TANC1;COBLL1;CERS6;ZNF385B;ARPC2;PTMA;GPC1;RPL32;RPL15;THRB;RPL14;RPL29;PROS1;RPL24;FSTL1;GATA2;ERICH6;MME;CCNL1;NAALADL2;MUC20;RPL35A;CCDC149;RPL9;NSUN7;CNGA1;PARM1;PCAT4;AC093827.4;AP001816.1;NPNT;RPL34;RPS3A;GUCY1A1;C5o…	MMEL1;CDC42;C1QA;ASAP3;ID3;RPL11;HMGN2;ATP5IF1;YBX1;RPS8;UQCRH;RAB3B;JUN;AC105277.1;HOOK1;JAK1;DNAJC6;LEPROT;SERBP1;RPL5;KIAA1324;PIFO;RHOC;TXNIP;RPS27;ARHGAP30;LMOD1;BTG2;H3F3A;GUK1;LAPTM4A;EPAS1;CALM2;RTN4;RPS27A;COX5B;DPP4;ATP5MC3;ZNF385B;RPL37A;IGFBP2;IGFBP5;ARPC2;NCL;PTMA;PASK;RPL32;RPL15;RPL14;TGM4;RHOA;SEMA3B-AS1;RPL29;MTRNR2L12;RPL24;CNBP;ACPP;ERICH6;CCNL1;SEC62;HES1;RPL35A;ATP5ME;CD38;RP…
HSC_CD34+	0	0	0	0	0	0	0	0	0	RPL22;ENO1;TNFRSF1B;CAPZB;HNRNPR;RPL11;SRRM1;RSRP1;TMEM50A;DNAJC8;ATP5IF1;LAPTM5;THRAP3;NDUFS5;SMAP2;TIE1;DPH2;ATP6V0B;RPS8;PRDX1;TUT4;SCP2;TMEM59;LEPR;ADGRL4;GNG5;GBP2;RPL5;PALMD;CD53;DRAM2;RAP1A;ATP1A1;PLEKHO1;MCL1;CTSS;S100A11;JTB;RPS27;SSR2;LAMTOR2;ACKR1;FCER1G;ATP1B1;SELP;FMO2;SOAT1;CEP350;GLUL;IVNS1ABP;RGS1;PTPRC;BTG2;H3F3A;TOMM20;CEP170;HNRNPU;RPS7;PPP1CB;ZFP36L2;CALM2;RTN4;RPS27A;CCDC88A;…	VWA1;GNB1;RPL22;VAMP3;PARK7;ENO1;AGTRAP;TNFRSF1B;SDHB;CAPZB;DDOST;CDC42;HNRNPR;ZNF436;RPL11;SRRM1;SYF2;RSRP1;TMEM50A;FAM110D;SH3BGRL3;WASF2;DNAJC8;ATP5IF1;LAPTM5;TINAGL1;SFPQ;THRAP3;MEAF6;NDUFS5;PABPC4;CAP1;PPT1;SMAP2;YBX1;TIE1;ATP6V0B;RPS8;PLK3;UQCRH;AL109659.2;NRDC;TUT4;SCP2;MAGOH;TMEM59;JUN;JAK1;PDE4B;MIER1;GNG12;GNG5;GBP2;RPL5;S1PR1;PRPF38B;PSMA5;GNAI3;SLC16A4;CD53;DRAM2;RAP1A;CAPZA1;BCAS2;CS…	TNFRSF1B;LAPTM5;ATP6V0B;MCL1;CTSS;S100A6;S100A4;RPS27;FCER1G;CD55;TOMM20;RPS27A;REL;CAPG;DUSP2;LIMS1;CXCR4;ZEB2;CFLAR;RPL37A;MLPH;RPL32;SELENOK;RYBP;COX17;CPA3;SERP1;TIPARP;SKIL;RPL35A;KIT;IGFBP7;CXCL2;AREG;SPARCL1;HPGDS;TET2;RPL34;ANXA5;RAPGEF2;RPL37;NSA2;TBCA;RPS23;RPS14;SERPINB1;PHACTR1;IER3;VEGFA;RPS12;TNFAIP3;UTRN;SOD2;QKI;ACTB;CYCS;LAMTOR4;NAMPT;PNPLA8;TMSB4X;SAT1;NDUFB11;SH3BGRL;RPL39;ASAH…	ENO1;RSRP1;ATP5IF1;LAPTM5;DPH2;PLPP3;CACHD1;ADGRL2;MCL1;S100A4;RPS27;SSR2;TMEM79;ARHGEF11;CD48;ADAMTS4;FCER1G;DNM3;RGL1;PTPRC;NR5A2;AL513217.1;IRF6;TGFB2;MARC2;HLX;RPS7;CMPK2;MBOAT2;ASAP2;PPP1CB;LTBP1;ZFP36L2;RPS27A;REL;LGALSL;WDR92;DUSP2;NPAS2;RGPD8;CXCR4;ZEB2;CYTIP;TANC1;PLA2R1;COBLL1;NOSTRIN;WIPF1;HOXD9;CALCRL;SF3B1;BZW1;RAPH1;EEF1B2;RPL37A;PTMA;SH3BP4;SETMAR;RPL32;FGD5;ZNF385D;ITGA9;TTC21A;MY…	ENO1;ATP5IF1;LAPTM5;RPS8;S100A4;RPS27;SSR2;FCER1G;ATP1B1;PTPRC;RPS7;RPS27A;REL;DUSP2;CXCR4;SF3B1;BZW1;RPL37A;LMCD1;RPL32;RPL29;SELENOK;ACPP;RPL34;ANXA5;IL7R;LIFR;PTGER4;RPL37;TBCA;UQCRQ;CD74;RPS14;SCGB3A1;HLA-B;HLA-DRA;HLA-DRB5;HLA-DQA2;HLA-DPA1;HLA-DPB1;EEF1A1;RPS12;CITED2;ACTB;LAMTOR4;TRBC2;TMSB4X;SH3BGRL;RPL39;RPL10;SARAF;RPL30;RPLP2;FTH1;MALAT1;RPS3;SRGN;KRT8;KRT18;RPS26;RPL41;ALOX5AP;TPT1;LC…	SDF4;RPL22;VAMP3;PARK7;ENO1;SRM;PRDM2;AKR7A2;CAPZB;NBL1;HP1BP3;HNRNPR;RPL11;SRRM1;SYF2;RSRP1;TMEM50A;WASF2;PTAFR;DNAJC8;ATP5IF1;TINAGL1;THRAP3;MEAF6;NDUFS5;YBX1;ATP6V0B;RPS8;UQCRH;TUT4;SCP2;PODN;MAGOH;TMEM59;PLPP3;JUN;NFIA;JAK1;MIER1;GNG12;ADGRL2;GNG5;LMO4;RPL5;PALMD;PSMA5;GNAI3;RAP1A;CSDE1;ATP1A1;MRPS21;PSMD4;S100A11;S100A6;S100A4;JTB;RAB13;RPS27;SSR2;NES;TAGLN2;PFDN2;NDUFS2;PBX1;MGST3;SELE;PRDX…	GABRD;RPL22;ENO1;RBP7;CDA;RPL11;RCAN3;SRRM1;CLIC4;RSRP1;TMEM50A;FAM110D;SH3BGRL3;PTAFR;ATP5IF1;LAPTM5;TINAGL1;FAM167B;THRAP3;NDUFS5;RPS8;LEPR;SAMD13;RPL5;MCL1;SEMA6C;S100A4;S100A13;RPS27;ADAM15;SSR2;NES;CD48;SELP;DNM3;RASAL2;RGL1;RGS1;PTPRC;BTG2;TRAF3IP3;SERTAD4-AS1;PROX1;TGFB2;MARC2;HLX;TOMM20;NID1;PXDN;RPS7;ASAP2;OST4;PPP1CB;EHD3;AC009414.2;RMDN2;SRSF7;EML4;ZFP36L2;RPS27A;REL;AAK1;TMSB10;CYTOR;…	SDF4;GABRD;RPL22;PARK7;ENO1;SDHB;AKR7A2;CAPZB;NBL1;HNRNPR;RPL11;SRRM1;SYF2;RSRP1;TMEM50A;WASF2;PTAFR;DNAJC8;ATP5IF1;TINAGL1;FAM167B;THRAP3;MEAF6;NDUFS5;YBX1;TIE1;ATP6V0B;RPS8;UQCRH;TUT4;SCP2;MAGOH;TMEM59;JUN;NFIA;JAK1;MIER1;USP33;ADGRL2;GNG5;LMO4;GBP2;RPL5;S1PR1;PSMA5;RAP1A;MRPS21;MCL1;PSMD4;S100A11;S100A6;S100A4;JTB;RAB13;RPS27;PBXIP1;FDPS;SSR2;NAXE;NES;ACKR1;TAGLN2;PFDN2;NDUFS2;PBX1;MGST3;SELP;…
Macrophage	0	0	0	0	0	0	0	0	0	0	PLA2G2A;SLC30A2;ZBTB8A;CD101;S100A9;S100A12;S100A8;CD1D;CD1E;CD244;CD55;HSD11B1;PROX1;TBCE.1;IL1R2;TMEM37;LINC00877;GPR171;KCNAB1;LEKR1;ABCG2;CKMT2-AS1;VCAN;RGS14;UBD;LINC01268;LINC00265;AC006333.2;EDA;GPRASP1;AP3M2;CDKN2A;FCN1;NSMF;MALAT1;CATSPER1;MMP12;PRDM10;C1S;TMTC2;AC005280.2;AC090527.3;TTC23;OTOA;AC009133.1;ZNF771;AC135050.1;TGFB1I1;MT1M;MT1G;C16orf74;DHX33;SPAG5;COL1A1;FAM20A;CD300E;AC132…	BTF3L4;CYB5RL;DRAM2;PLEKHO1;S100A12;S100A8;RAB13;HSPA6;FCGR3A;ATF6;ATP1B1;PACERR;LAX1;LAMB3;BROX;DEGS1;SNAP47;PDIA6;RHOB;HADHB;SLC8A1;VAMP5;SLC20A1;DHRS9;SLC40A1;STAT1;CAVIN2;CYP27A1;DOCK10;AGAP1;SLC4A7;CX3CR1;NAA80;LINC00877;ALCAM;ATP6V1A;CD86;PARP14;GATA2;PLXND1;ACPP;CPA3;AC080013.1;TBL1XR1;PPP1R2;LAP3;RBPJ;GPRIN3;MARCH1;CPE;MAST4;FCHO2;HEXB;LNPEP;TGFBI;GM2A;ITK;PPP1R18;DDX39B;HLA-DRA;HLA-DRB5;…	FNDC10;PLEKHG5;PER3;ARHGEF10L;C1QA;C1QC;C1QB;SLC30A2;SDC3;SERINC2;LCK;DLGAP3;COL8A2;SVBP;ERMAP;HECTD3;NSUN4;RAB3B;NDC1;PLPP3;FPGT;ADGRL2;LRRC8C;LRRC8D;SNX7;DBT;SORT1;ADORA3;CTTNBP2NL;SLC16A1-AS1;MAGI3;OLFML3;SRGAP2B;C1orf54;TCHH;TMEM79;ARHGEF11;PYHIN1;SLAMF8;CD244;TOMM40L;FCGR2B;CREG1;XCL2;XCL1;SLC19A2;STX6;RGL1;CAMSAP2;KIF21B;KLHL12;SRGAP2;IRF6;LINC00467;BPNT1;C1orf115;HLX;AL392172.1;DISP1;DISC1…	SDF4;CNKSR1;TMEM125;GBP4;ACP6;FCGR1A;S100A12;MUC1;SH2D2A;IFI16;NDUFS2;XCL1;ABL2;PTGS2;RGS13;SRGAP2;AIDA;FEZ2;RHOQ;TRABD2A;SH2D6;VAMP5;GNLY;CD8A;CD8B;AC133644.2;ZAP70;MAP4K4;LYPD6B;SLC40A1;NABP1;ICOS;INPP5D;SH3BP5-AS1;APPL1;FRMD4B;PROK2;TRAT1;ATP6V1A;TIGIT;ACPP;GPR171;MFSD1;GNB4;B3GNT5;MUC4;TFRC;CXCL2;SEC31A;TET2;FNIP2;RAPGEF2;RETREG1;DAB2;SELENOP;GZMK;MAP3K1;MAST4;NAIP;MEF2C;ST8SIA4;TGFBI;NRG2;AT…	FBLIM1;HSPB7;NBL1;PLA2G2A;CAMK2N1;C1QC;ZNF436-AS1;ASAP3;NIPAL3;RPS6KA1;PIGV;THEMIS2;PTAFR;TINAGL1;COL16A1;ZBTB8A;GJA4;ZC3H12A;DNALI1;ST3GAL3;TSPAN1;CYP4X1;ZFYVE9;TACSTD2;RAVER2;PDE4B;SGIP1;WDR78;ANKRD13C;PTGER3;NEXN;SYDE2;GBP5;LRRC8D;SLC44A3;GSTM5;GSTM3;HIST2H2BE;SV2A;ECM1;CTSS;SEMA6C;TNFAIP8L2;SELENBP1;S100A9;S100A8;PEAR1;AIM2;ARHGAP30;RGS5;SELL;HMCN1;CFH;MIR181A1HG;SHISA4;LMOD1;ELF3;FMOD;PRELP;…	FNDC10;PLEKHG5;SLC2A5;RBP7;TMEM51;PADI2;ARHGEF10L;ALDH4A1;PLA2G2A;C1QA;C1QC;C1QB;CLIC4;SLC30A2;ZNF683;PTAFR;FABP3;LCK;DLGAP3;COL8A2;MFSD2A;COL9A2;ERMAP;SPATA6;PARS2;DHCR24;DDAH1;EVI5;BCAR3;SORT1;TMIGD3;CTTNBP2NL;SYT6;CD2;FCGR1B;FAM72B;AC246785.3;C1orf54;CTSK;AL391069.3;S100A9;ATP8B2;SHE;ARHGEF11;PYHIN1;SLAMF8;PEA15;SLAMF6;SLAMF1;FCER1G;XCL2;XCL1;SELP;FMO4;RASAL2;ABL2;RGL1;NAV1;CDK18;RAB7B;C1orf11…	FBLIM1;HSPB7;CAMK2N1;C1QA;C1QC;C1QB;ZNF436-AS1;PIGV;THEMIS2;PTAFR;LAPTM5;SERINC2;TINAGL1;ZBTB8A;GJA4;DNALI1;MFSD2A;COL9A2;TSPAN1;CYP4X1;CDKN2C;ZFYVE9;SGIP1;PTGER3;NEXN;GBP5;FAM69A;VAV3;HENMT1;KIAA1324;CELSR2;GSTM5;GSTM3;CD53;DENND2D;SV2A;CTSS;SEMA6C;SELENBP1;TCHH;S100A9;S100A8;ARHGAP30;FCER1G;FCGR2A;FCGR3A;RGS5;SOAT1;NCF2;AL136987.1;RGS1;MIR181A1HG;SHISA4;LMOD1;ELF3;PRELP;ATP2B4;SOX13;ETNK2;SLC45…
Monocyte	0	0	0	0	0	0	0	0	0	0	0	ISG15;AGTRAP;RCC2;AKR7A2;HNRNPR;RPS6KA1;WASF2;STX12;THEMIS2;EIF3I;MARCKSL1;AK2;ZMYM4;MEAF6;SF3A3;PPT1;SVBP;BTF3L4;CYB5RL;FUBP1;SARS;CSF1;DRAM2;SRGAP2C;AC245014.3;NBPF9;PLEKHO1;TNFAIP8L2;S100A9;JTB;FDPS;GON4L;MEF2D;CD1D;DUSP23;PEA15;ARHGAP30;HSPA6;FCGR3A;FCGR2B;ATF6;RCSD1;TIPRL;ATP1B1;TOR1AIP2;DHX9;FAM129A;MIR181A1HG;MIA3;BROX;DEGS1;ACBD3;MRPL55;SDCCAG8;GCSAML;IAH1;PDIA6;RHOB;HADHB;YPEL5;SLC8A1;CO…	ACAP3;NADK;NPHP4;RBP7;FBXO2;PLOD1;TMEM51;FHAD1;BX284668.5;PADI2;PADI4;ARHGEF10L;PQLC2;CDA;XKR8;AL136115.2;TMEM39B;DLGAP3;EVA1B;STK40;ERMAP;BTBD19;ELAVL4;NEXN;LRRC8D;BCAR3;S1PR1;SORT1;AMPD2;ADORA3;CTTNBP2NL;OLFML3;TTF2;NBPF26;SRGAP2B;NBPF10;C1orf54;ADAMTSL4;CTSS;TNFAIP8L2;AL391069.3;S100A9;S100A8;TMEM79;CD1D;AIM2;SLAMF8;TOMM40L;SH2D1B;AL021068.1;F5;FASLG;RASAL2;NPL;RGL1;RGS18;ZNF281;RNPEP;NUAK2;SR…	SDF4;GNB1;RCC2;PLA2G2A;DDOST;RPS6KA1;PHACTR4;EPB41;EIF3I;SF3A3;SMAP2;PPCS;NRDC;AK5;AC103591.3;GBP4;FAM102B;STXBP3;HIPK1;CD58;SRGAP2C;FCGR1A;ENSA;SCNM1;S100A9;UBAP2L;ARHGEF2;CD1C;IFI16;PEA15;PFDN2;NDUFS2;TOR1AIP2;STX6;PTGS2;RGS18;AL136987.1;RNPEP;PPP1R15B;SRGAP2;PROX1;AIDA;ACBD3;CEP170;ADSS;ACP1;FAM49A;PUM2;FEZ2;CYP1B1;RHOQ;PELI1;PPP3R1;MXD1;CD207;SH2D6;MAT2A;VAMP5;GNLY;CD8A;IGKC;AFF3;MAP4K4;BCL2L…	MMP23B;KCNAB2;GPR153;TNFRSF9;RBP7;PLA2G2A;CAMK2N1;WNT4;C1QA;C1QB;LINC01355;ZNF436-AS1;ASAP3;RPS6KA1;PTAFR;LAPTM5;TINAGL1;COL16A1;AL136115.2;CSF3R;ZC3H12A;COL9A2;RIMS3;LURAP1;CYP4X1;RAB3B;SHISAL2A;PODN;PLPP3;PDE4B;NEXN;SYDE2;CYR61;GBP5;LRRC8D;CNN3;VAV3;KIAA1324;CSF1;CD101;SV2A;CTSS;LYSMD1;S100A9;S100A8;NES;MNDA;AIM2;ATP1A2;CD84;F11R;ARHGAP30;KLHDC9;FCER1G;FCGR2A;RGS5;UCK2;GPR161;SELL;PRRX1;KIAA161…	NADK;MMEL1;PER3;RBP7;PLOD1;TNFRSF8;KAZN;TMEM51;FHAD1;PADI2;CDA;KIF17;C1QA;C1QC;C1QB;SDC3;KIAA1522;DNALI1;MTF1;MFSD2A;ERMAP;TMEM125;SPATA6;BEND5;ELAVL4;CYR61;BCAR3;SNX7;PSRC1;SORT1;CTTNBP2NL;AL390729.1;SLC22A15;AC245014.1;NBPF10;FMO5;NBPF14;NBPF9;CTSS;AL391069.3;S100A9;S100A12;S100A8;ARHGEF11;MNDA;ACKR1;SLAMF8;FCER1G;FCGR2B;RASAL2;RGL1;COLGALT2;PTGS2;RGS18;RGS13;C1orf53;NAV1;SHISA4;FMOD;NUAK2;RAB7…	KCNAB2;GPR153;IGSF21;PLA2G2A;CAMK2N1;CDA;KIF17;C1QC;C1QB;CEP85;TRNP1;TENT5B;THEMIS2;PTAFR;SERINC2;TINAGL1;AL136115.2;CSF3R;COL9A2;RIMS3;B4GALT2;TSPAN1;SHISAL2A;ROR1;NEXN;SYDE2;GBP5;LRRC8D;VAV3;CSF1;NBPF10;NBPF9;SV2A;CTSS;LYSMD1;TCHH;S100A9;S100A8;IL6R-AS1;NES;CD1D;MNDA;ATP1A2;CD48;FCER1G;RGS5;NPL;LAMC1;NCF2;COLGALT2;AL136987.1;RGS1;RGS13;PHLDA3;ELF3;PTPN7;ETNK2;SLC41A1;IKBKE;IL10;PIGR;PFKFB2;SERT…
Neutrophils	0	0	0	0	0	0	0	0	0	0	0	0	UBXN11;CYB5RL;SORT1;NBPF14;S100A9;S100A8;PYHIN1;FCGR3A;XCL2;XCL1;SLC19A2;FASLG;RNASEL;AC092803.2;CYP1B1;ZFP36L2;AC008074.3;IL1B;HNMT;GCA;ITGA4;STAT4;AC114760.2;TTLL4;TSEN2;ACVR2B;CSTA;AC080013.1;SPON2;CCSER1;AC004069.1;TLR2;ACSL1;IL7R;PARP8;GZMA;GAPT;VCAN;NUDT12;TGFBI;LY86;RNF144B;CUL7;PLA2G7;CD164;VNN2;CITED2;UTRN;IQCE;ISPD;CDK13;STK17A;PILRA;AC007032.1;TRBC1;TRBC2;CSF2RA;IL3RA;REPS2;NHS;GK;CYBB…	FCGR3A;XCL2;ATP1B1;PTGS2;ODC1;CCT7;AC114760.2;CCL20;MLPH;RARRES1;KIT;CXCL2;HPGDS;TET2;RAPGEF2;IL7R;GZMA;RHOBTB3;ELL2;CD74;LTC4S;HLA-DRA;HLA-DRB5;HLA-DQA1;HLA-DQB1;HLA-DMA;TREM1;VEGFA;CITED2;DNAJB6;C9orf72;NUP214;HBB;TPP1;TMEM109;RSF1;BIRC3;JMJD1C;PRF1;KRT18;THAP2;DUSP6;RGCC;GZMB;NUMB;PAPOLA;DENND4A;MEF2A;HBA2;IL32;TRAPPC1;RAB27B;PRNP;AC020916.1;OSM;YWHAH;TIMP3	HES4;MMEL1;PARK7;LZIC;RBP7;AKR7A2;ECE1;HNRNPR;WASF2;IFI6;STX12;PTAFR;EIF3I;MARCKSL1;ZMYM4;EVA1B;CSF3R;MEAF6;SF3A3;GPBP1L1;BTF3L4;ZYG11B;ECHDC2;TMEM59;PLPP3;NFIA;LEPROT;PDE4B;GADD45A;FUBP1;ODF2L;CNN3;SARS;GSTM2;AHCYL1;RHOC;RSBN1;RPRD2;S100A9;S100A8;S100A13;GATAD2B;SLC39A1;RAB13;FDPS;MEF2D;NTRK1;PBX1;MGST3;TIPRL;ATP1B1;SELL;RALGPS2;TOR1AIP2;DHX9;FAM129A;PTGS2;RGS18;RGS13;NEK7;RASSF5;TRAF3IP3;MIA3;D…	MMEL1;SMIM1;TMEM201;RBP7;PADI2;PADI4;CDA;CLIC4;CD52;FGR;PTAFR;KIAA1522;COL8A2;CYB5RL;ODF2L;EVI5;CD2;NUDT17;S100A9;S100A12;S100A8;PYHIN1;CFAP45;XCL2;XCL1;KIAA1614;NCF2;PTGS2;AL390957.1;RGS13;KIF14;NAV1;AC092803.2;HLX;FAM49A;EFR3B;KIF3C;YPEL5;CYP1B1;EML4;HAAO;ZFP36L2;LINC00309;EXOC6B;HK2;CD8A;CD8B;EIF2AK3;LYG2;IL1B;ZEB2-AS1;CD302;AC009948.3;SESTD1;ITGA4;STAT4;AC114760.2;CASP8;ICOS;NRP2;KLF7;TTLL4;D…	HES4;MMEL1;KCNAB2;AKR7A2;ECE1;HNRNPR;WASF2;STX12;PTAFR;LAPTM5;EIF3I;MARCKSL1;ZMYM4;EVA1B;MEAF6;SF3A3;YBX1;RPS8;BTF3L4;PLPP3;LEPROT;GADD45A;FUBP1;F3;CNN3;VAV3;HENMT1;SARS;AHCYL1;CD53;RHOC;CTSS;VPS72;S100A9;S100A8;SLC39A1;RAB13;FDPS;MEF2D;MRPL24;FCER1G;FCGR2A;MGST3;TIPRL;RALGPS2;DHX9;NCF2;FAM129A;PTGS2;PACERR;NEK7;PTPN7;LAX1;SLC45A3;RASSF5;ATF3;DEGS1;ENAH;EPHX1;GCSAML;IAH1;ODC1;PDIA6;RHOB;SF3B6;FAM…
NK_cell	0	0	0	0	0	0	0	0	0	0	0	0	0	PER3;KAZN;TMEM51-AS1;ARHGEF10L;AL050341.2;NSUN4;WLS;SORT1;CD160;CGN;CD1D;IFI16;PTPN7;LINC00467;KCNK1;OPN3;SLC8A1;STON1;EGR4;SH2D6;IL1RN;TMEM37;HNMT;STAT4;SLC11A1;PID1;ITM2C;IL5RA;PROK2;MECOM;ETV5;XXYLT1;TRMT44;KIT;SHROOM3;SNCA;HPGDS;MARCH1;ACSL1;VCAN;NRG2;VARS2;RNF217;MICALL2;SEMA3C;HEPACAM2;ZKSCAN5;PILRA;SLC26A4;DNAJB6;CSF2RA;ARHGAP6;MED12;MTMR1;CNTLN;PTDSS2;ADM;MUC15;ACP2;EEF1G;IPMK;JMJD1C;CD4;…	MMP23B;SLC35E2A;PLEKHG5;PER3;TNFRSF9;SLC45A1;KAZN;FBLIM1;ARHGEF10L;NBL1;PLA2G2A;CAMK2N1;ZNF436-AS1;ZNF683;SDC3;TINAGL1;ZBTB8A;PHC2;GJA4;EVA1B;AL050341.2;RIMS3;CTPS1;SVBP;HYI;IPO13;EIF2B3;TESK2;SPATA6;BEND5;OSBPL9;ZFYVE9;SHISAL2A;COA7;LRRC42;PLPP3;NFIA;EFCAB7;AL359504.2;CYR61;GFI1;TMEM56;KIAA1324;CELSR2;CTTNBP2NL;WNT2B;VANGL1;PTGFRN;PHGDH;AC245014.3;CD160;PRKAB2;C1orf54;CTSK;SELENBP1;AL358472.4;EF…	KIAA1522;AL592494.3;FCER1A;RGS13;RHEX;CNRIP1;CAVIN2;B3GNT7;RBMS3;CCR9;GATA2;CHST2;KIT;CXCL2;MMRN1;IL13;PDE7B;RAB32;NME8;SMIM10;MYOM2;ADAM28;LYN;RHPN1;BNC2;PTGDS;IFITM10;OSBPL5;SPI1;ASRGL1;MALAT1;EFEMP2;IL18;VWA5A;AKR1C3;LRMDA;HHEX;SLC18A2;PSTK;RASSF8;CMKLR1;PCDH9;EDNRB;CLMN;AHNAK2;ATP8B4;THSD4;TPSB2;TPSAB1;TPSD1;ITGAX;LPCAT2;KIFC3;PIK3R6;KRT13;KRT14;KIR2DL3;NCR1;A1BG-AS1;MLC1	TNFRSF18;SLC35E2A;ICMT;PLEKHG5;PER3;SLC45A1;TMEM51-AS1;FBLIM1;ARHGEF10L;PLA2G2A;CAMK2N1;ID3;ZNF683;SLC9A1;MAP3K6;FGR;TINAGL1;COL16A1;LCK;ZBTB8A;PHC2;GJA4;EVA1B;AL050341.2;KCNQ4;CTPS1;TIE1;HYI;IPO13;SLC6A9;EIF2B3;NSUN4;CDKN2C;ZFYVE9;GPX7;SHISAL2A;COA7;DHCR24;PLPP3;EFCAB7;ROR1;HHLA3;PTGER3;FPGT;NEXN;TTLL7;SYDE2;CYR61;GBP5;FNBP1L;BCAR3;SNX7;S1PR1;VAV3;HENMT1;CELSR2;PSRC1;DENND2D;SLC16A1-AS1;MAGI3;CD…
Pre-B_cell_CD34-	0	0	0	0	0	0	0	0	0	0	0	0	0	0	HES4;SDF4;RBP7;NBL1;CAMK2N1;PINK1;DDOST;ECE1;C1QC;ID3;CNKSR1;SYTL1;PTAFR;PHACTR4;KPNA6;EIF3I;EVA1B;CSF3R;SF3A3;PPCS;HYI;RNF11;OSBPL9;NRDC;SHISAL2A;NFIA;PDE4B;GADD45A;GNG12;DNAJB4;ADGRL2;CYR61;LMO4;GBP5;ARHGAP29;STXBP3;GSTM3;KCNA3;RNF115;LIX1L;RPRD2;S100A9;S100A8;PMVK;IFI16;NDUFS2;MPZL1;SELL;TOR1AIP2;LAMC1;RGS13;CFH;NEK7;MIR181A1HG;INAVA;CSRP1;ELF3;NUCKS1;RASSF5;PIGR;AIDA;ACBD3;CDC42BPA;OPN3;AKT3;…	RNF223;SCNN1D;FNDC10;RBP7;ARHGEF10L;CDA;C1QA;C1QC;CNKSR1;KDF1;PTAFR;MFSD2A;TMEM125;B4GALT2;CYP4B1;WLS;AK5;DDAH1;EVI5;SORT1;TMIGD3;CTTNBP2NL;FMO5;AC239803.1;FCGR1A;S100A9;S100A12;MUC1;IFI16;LINC01133;F5;AL449106.1;HMCN1;PTGS2;RGS13;NAV1;PTPN7;CDK18;PROX1;KCNK1;OPN3;AC079148.1;IFT172;EGR4;IL1B;PRSS40A;MZT2A;CXCR4;HNMT;ZEB2-AS1;ITGB6;HOXD9;STAT4;TMEM169;SLC11A1;ITM2C;IL5RA;LINC00852;ITGA9;CXCR6;KIF9…	HES4;SDF4;AURKAIP1;NBL1;CAMK2N1;C1QA;C1QB;ID3;PTAFR;PHACTR4;LAPTM5;EIF3I;EVA1B;SF3A3;MFSD2A;PPCS;HYI;TSPAN1;NRDC;JUN;NFIA;GADD45A;GNG12;DNAJB4;ADGRL2;CYR61;LMO4;GBP5;ARHGAP29;HENMT1;STXBP3;SARS;GSTM3;CD53;AL355816.2;DENND2D;HIPK1;RNF115;LIX1L;ENSA;CTSS;PSMD4;CGN;S100A9;S100A8;MUC1;SH2D2A;IFI16;FCRL6;LINC01133;ARHGAP30;NDUFS2;FCER1G;FCGR2A;FCGR3A;MGST3;RASAL2;LAMC1;FAM129A;NEK7;MIR181A1HG;INAVA;CS…
Smooth_muscle_cells	0	0	0	0	0	0	0	0	0	0	0	0	0	0	0	VWA1;MMP23B;GPR153;PLEKHG5;MIR34AHG;AL928921.2;TMEM201;PLOD1;PDPN;TMEM51;HSPB7;EPHA2;PADI2;ARHGEF10L;ALDH4A1;HSPG2;C1QA;LINC01355;ZNF436;CLIC4;SELENON;FAM110D;AHDC1;TMEM200B;FABP3;TINAGL1;COL16A1;TSSK3;ZBTB8A;COL8A2;EVA1B;DNALI1;FHL3;RIMS3;B4GALT2;MAST2;CYP4X1;FOXD2;SPATA6;BEND5;ZFYVE9;SHISAL2A;GLIS1;CYB5RL;PARS2;AC099791.2;CACHD1;PDE4B;WDR78;GNG12;DIRAS3;LINC01725;AL359504.2;SSX2IP;SYDE2;DDAH1;A…	MFAP2;C1QC;GLIS1;HOOK1;PTGFR;SLC44A3;NTNG1;COLGALT2;DNAH14;URB2;LINC00954;SRD5A2;AC106869.1;GNLY;LRP1B;RPRM;AC007405.3;ZNF385B;ACADL;GLB1L;SLC4A3;COL4A3;KIF1A;FGD5;SH3BP5;CMTM8;ROBO2;CADM2;LRRC34;CLDN11;IGF2BP2;HTRA3;KDR;AC105383.1;DAB2;BHMT2;LOX;LY6G6F-LY6G6D;CFB;EPHA7;CD24;SLC18B1;IL20RA;AFDN;MPP6;CPVL;PCLO;SEMA3E;SEMA3D;ABCB1;STEAP1;CYP51A1;MXRA5;SLC38A5;CLCN5;NUDT10;NUDT11;NLGN3;NRK;MUM1L1;HS…
T_cells	0	0	0	0	0	0	0	0	0	0	0	0	0	0	0	0	TNFRSF18;FAM213B;PLEKHG5;C1orf167;PLOD1;EPHA2;ARHGEF10L;ALDH4A1;CAMK2N1;ZNF683;AHDC1;FGR;TMEM200B;TINAGL1;GJA4;EVA1B;DNALI1;RIMS3;MAST2;CYP4X1;SPATA6;BEND5;ZFYVE9;SHISAL2A;TTC22;AC099791.2;GNG12;NEXN;GBP5;GFI1;EVI5;SNX7;S1PR1;VAV3;CELSR2;PSRC1;KCNC4;AL365361.1;DENND2D;CTTNBP2NL;AC246785.3;CD160;C1orf54;CIART;LYSMD1;RORC;SH2D2A;FCRL3;FCRL6;SLAMF6;SLAMF1;ARHGAP30;RGS5;PRRX1;DNM3OS;RGL1;PLA2G4A;AL13…
Tissue_stem_cells	0	0	0	0	0	0	0	0	0	0	0	0	0	0	0	0	0
