# Supplementary material for: Theoretical framework for the difference of two negative binomial distributions and its application in comparative analysis of sequencing data
Source: HighWire-hosted journal article supplement (doi:10.1101/gr.278843.123), 2024-10-01
Supplement: Supplemental_Table_S11.xlsx [file Supplemental_Table_S11.xlsx]

## Sheet: Sheet1
Supplementary File S11: DEGs detected by DEGage from the Rao-Ruiz dataset.
FC dVenus+ vs dVenus-					NS dVenus+ vs dVenus-					HC dVenus+ vs dVenus-					FC vs NS					FC vs HC
Gene	pval	FDR	lfc		Gene	pval	FDR	lfc		Gene	pval	FDR	lfc		Gene	pval	FDR	lfc		Gene	pval	FDR	lfc
Acot1	0	0	-5.93403		Alkbh7	1.4013e-45	1.10875e-43	-9.06571		Aktip	1.4013e-45	1.15798e-43	-4.76108		AA415398	0	0	6.50441		Aa414768	0	0	8.43376
Asb11	0	0	6.08		Itgam	1.4013e-45	1.10875e-43	7.85122		Ccdc6	1.4013e-45	1.15798e-43	-6.67921		AA987161	0.0321901	0.0391463	2.71674		Aa987161	0.0330414	0.0418841	3.78524
Ascl1	0	0	-3.93518		Mpst	1.4013e-45	1.10875e-43	-7.88291		Ercc1	1.4013e-45	1.15798e-43	-8.44212		AI846148	0.0124227	0.0167963	3.00251		Ai115009	0	0	2.43102
Cyp11a1	0	0	-3.71308		Pick1	1.4013e-45	1.10875e-43	-3.10569		Etv5	1.4013e-45	1.15798e-43	7.90718		AI854703	3.49545e-21	6.93987e-20	2.04536		Ai314180	0.00154524	0.00257211	2.63774
Gc	0	0	-4.50225		Sae1	1.4013e-45	1.10875e-43	-9.13368		Fbxo31	1.4013e-45	1.15798e-43	-4.86071		AU040320	0.000636671	0.00115879	3.87052		Ai836003	0.0063573	0.0093971	2.94218
Pigu	0	0	-4.78457		Sdf2l1	1.4013e-45	1.10875e-43	-6.79404		Frs2	1.4013e-45	1.15798e-43	-2.04818		AW554918	0.00161783	0.00274905	3.18171		Ak129341	1.08739e-09	8.68097e-09	5.35467
Gng4	0	0	9.93725		Sdhaf1	1.4013e-45	1.10875e-43	8.84423		Kctd16	1.4013e-45	1.15798e-43	-8.13652		Aaas	0	0	5.98794		Au019823	5.61462e-17	7.84542e-16	2.1485
Itih3	0	0	-5.80751		Slc7a5	1.4013e-45	1.10875e-43	7.10035		Mast2	1.4013e-45	1.15798e-43	-6.24421		Aatf	0.0402955	0.0478149	2.03751		Au022754	0.0292074	0.0374418	4.15279
Lgi3	0	0	-3.61981		Sv2a	1.4013e-45	1.10875e-43	1.65584		Nat14	1.4013e-45	1.15798e-43	-3.03273		Abcb1b	0.0166259	0.021733	2.98287		Au041133	0.00340151	0.00531419	3.67198
Megf6	0	0	10.8079		Taf5l	1.4013e-45	1.10875e-43	-5.93494		Nudt18	1.4013e-45	1.15798e-43	-7.96203		Abcc4	0	0	5.35619		Abca8b	4.77303e-06	1.62097e-05	4.06379
Cavin1	0	0	6.75635		Unc45a	1.4013e-45	1.10875e-43	7.79229		Eprs1	1.4013e-45	1.15798e-43	5.24952		Abhd2	0.000683909	0.00123726	2.2483		Abcb4	0	0	5.8705
Rcc1	0	0	4.24102		Ywhae	1.4013e-45	1.10875e-43	-1.31299		Qtrt2	1.4013e-45	1.15798e-43	8.29567		Abtb1	0.0105123	0.0144914	4.60656		Abcb6	0.00133108	0.00224629	3.80799
Sdk1	0	0	7.50565		Hdgf	4.2039e-45	2.92372e-43	-2.04682		Rasal1	1.4013e-45	1.15798e-43	-4.50191		Ache	0	0	3.67464		Abcc1	0	0	6.08667
Shd	0	0	-8.05037		Cldn12	1.54143e-44	9.61763e-43	1.17742		Rbpj	1.4013e-45	1.15798e-43	7.40888		Acot3	0	0	4.46009		Abhd2	0.0142437	0.0194598	2.84828
Slc27a2	0	0	-5.23644		Dis3l	1.82169e-44	1.11747e-42	5.14723		Rnf32	1.4013e-45	1.15798e-43	8.58674		Acot4	0.0256503	0.0319032	3.41205		Ablim1	0.00295891	0.00467556	2.2866
Sorcs1	0	0	7.93804		Edem3	2.66247e-44	1.61508e-42	1.03732		Ctdsp2	1.4013e-45	1.15798e-43	-3.09237		Acot8	0.0145782	0.0193614	3.33415		Acad11	0	0	5.30405
Sst	0	0	23.3599		Bckdhb	7.84727e-44	4.37165e-42	4.32699		Slc4a3	1.4013e-45	1.15798e-43	-3.09006		Acot9	1.96521e-35	1.03055e-33	3.58267		Acan	6.13248e-14	7.14231e-13	2.36525
Ccdc103	1.4013e-45	7.51542e-43	-6.73526		Mcee	8.40779e-44	4.66014e-42	-1.70741		Srgap3	1.4013e-45	1.15798e-43	1.77409		Actl6a	1.17048e-05	3.57378e-05	2.32122		Acd	0.00583729	0.00871152	2.75113
Fkbp1b	1.4013e-45	7.51542e-43	-6.46797		Pias4	1.079e-43	5.8908e-42	1.5873		Suco	1.4013e-45	1.15798e-43	7.3261		Acvr1b	4.42342e-09	3.62746e-08	5.58		Acer3	0.0166464	0.0224061	2.92078
Nkain4	1.4013e-45	7.51542e-43	-3.75228		Dgcr8	1.26117e-43	6.85109e-42	1.15717		Trmt1l	1.4013e-45	1.15798e-43	-7.98786		Adam1a	0.0119213	0.0162027	2.21777		Acot4	0	0	5.86768
P2ry12	1.4013e-45	7.51542e-43	1.41008		Sstr2	1.93379e-43	1.025e-41	1.99311		Wdr5	1.4013e-45	1.15798e-43	-9.22616		Adam8	7.80442e-05	0.000165665	6.10344		Acot8	7.67901e-05	0.000160608	3.39681
Tent4a	1.4013e-45	7.51542e-43	1.22964		Fbxo38	4.37205e-43	2.23077e-41	-1.75076		Zfpl1	1.4013e-45	1.15798e-43	-7.92247		Adamts10	0.000462819	0.000858943	2.30336		Adam15	1.42923e-12	1.51396e-11	2.14286
Pkd1l3	1.4013e-45	7.51542e-43	-5.99736		Ifnar2	7.52497e-43	3.70113e-41	1.13322		Zfyve9	1.4013e-45	1.15798e-43	7.73673		Adamts15	0.000965412	0.00170924	3.03369		Adam17	3.58555e-06	1.27506e-05	2.04977
Zfp369	2.8026e-45	1.27184e-42	-3.74854		Commd9	8.40779e-43	4.09842e-41	1.47273		Acot9	2.8026e-45	2.03066e-43	1.90079		Adamts17	0.000101404	0.000208991	3.37533		Adam9	0.0303276	0.038735	2.0859
Traip	9.80909e-45	3.12804e-42	-3.63029		Ppp1r12c	1.14626e-42	5.46552e-41	2.02951		Ddit4	2.8026e-45	2.03066e-43	-6.96533		Adarb2	0	0	5.088		Adamts15	0.0348442	0.0439218	-3.4535
Ccdc142	1.12104e-44	3.48083e-42	1.28168		Tor4a	1.24716e-42	5.92074e-41	1.87471		Lnx1	2.8026e-45	2.03066e-43	-4.27317		Coq8a	0.0130234	0.0175194	2.9291		Adamts20	0	0	4.28915
Prkra	2.07392e-43	4.44913e-41	3.25976		Ddhd1	1.32563e-42	6.23902e-41	1.92032		Rad51d	2.8026e-45	2.03066e-43	-2.91014		Adcy8	5.74892e-10	5.51243e-09	2.69954		Adamts3	0.00938541	0.0133853	3.67543
Poc1a	1.9394e-42	3.35471e-40	-3.71969		Tmem134	2.68068e-42	1.2247e-40	1.51199		Snx6	2.8026e-45	2.03066e-43	-2.77365		Adcy6	0.00504974	0.00762941	4.0627		Azin2	0	0	6.97143
Zfp185	2.11176e-42	3.55952e-40	2.08872		Top1mt	2.94133e-42	1.33818e-40	1.72941		Tspan5	2.8026e-45	2.03066e-43	-2.09099		Adhfe1	5.08045e-07	2.53784e-06	-4.16401		Coq8b	0	0	4.18024
Tspan17	2.86706e-42	4.63403e-40	1.10189		Tmx4	3.60134e-42	1.62492e-40	1.0158		Wbp1l	4.2039e-45	2.96019e-43	6.52486		Adra1d	2.47375e-10	2.44531e-09	2.27243		Adcy10	0	0	4.16684
Tmem65	6.20775e-42	9.15566e-40	1.16104		Pea15a	3.94325e-42	1.75026e-40	-2.09395		Aldh5a1	7.00649e-45	4.67053e-43	3.6965		Agbl5	0	0	5.71788		Adcy6	0	0	4.21125
Zfp668	7.16764e-42	1.01893e-39	-1.825		Cars1	4.096e-42	1.8107e-40	1.89958		Pigp	7.00649e-45	4.67053e-43	-3.23108		Agps	0.0133672	0.0179158	3.75262		Adhfe1	0	0	5.2124
Ankrd34a	1.8378e-41	2.33164e-39	-1.84668		Erh	4.19549e-42	1.84162e-40	-2.46183		Khdrbs2	9.80909e-45	6.32781e-43	-3.07315		Phykpl	0	0	4.15059		Adprs	0.00142917	0.00239559	2.6629
Zfp873	8.04766e-41	9.21886e-39	3.0754		Zbtb18	4.50377e-42	1.95146e-40	-1.63367		Cp	2.24208e-44	1.34243e-42	6.03131		Akap10	9.7152e-42	1.74784e-39	2.27086		Adsl	0.00742824	0.0108184	2.18718
Maneal	9.08125e-41	1.02047e-38	-2.42429		Lct	5.56175e-42	2.3909e-40	-4.82423		Eloc	2.24208e-44	1.34243e-42	-5.56999		Akap12	0.00502866	0.00760051	-3.36594		Afap1	0.00775067	0.0112409	2.59415
Slc45a4	1.71128e-40	1.81904e-38	2.89424		Chmp4b	7.68752e-42	3.25349e-40	1.63763		Maged1	2.66247e-44	1.55684e-42	-1.88692		Akap13	0.00744121	0.0107138	2.36627		Aff1	6.22043e-09	4.4385e-08	4.20518
Ctsf	1.75443e-40	1.84826e-38	-1.9903		Hcrt	7.80523e-42	3.2879e-40	1.41295		Zc3h7a	3.64338e-44	2.10579e-42	2.73421		Akap5	1.22592e-10	1.25314e-09	-2.78744		Aff2	7.9027e-13	8.5367e-12	3.59722
Tox2	1.79442e-40	1.85722e-38	5.11875		Chmp2a	8.28868e-42	3.45786e-40	-1.20725		Mrpl48	3.92364e-44	2.22912e-42	-2.25627		Akna	0.00860763	0.0121685	2.58842		Aifm3	6.61878e-20	1.09096e-18	2.11677
Uxs1	2.11816e-40	2.12464e-38	1.7646		Nrip3	9.13647e-42	3.75042e-40	3.11787		Hsbp1	6.02558e-44	3.34721e-42	-1.40577		Alas2	1.76143e-06	7.46582e-06	2.92601		Airn	1.17424e-08	7.9101e-08	6.14121
Plce1	4.54749e-40	4.15937e-38	1.98811		Pdzd4	1.0123e-41	4.13981e-40	1.9252		Glg1	6.44597e-44	3.56095e-42	-2.35845		Aldh16a1	0.0162358	0.0212801	5.54233		Akap12	0.000289899	0.000538056	-4.91441
Ndufaf6	6.61865e-40	5.87169e-38	2.07345		Ythdc2	1.1607e-41	4.71139e-40	1.44399		Ube2d2a	6.5861e-44	3.5986e-42	-1.1603		Aldh18a1	2.61454e-08	1.8319e-07	7.10828		Akap5	2.37487e-14	2.83796e-13	-3.03938
Alg9	7.60827e-40	6.64962e-38	1.80754		Ell	1.80529e-41	7.14203e-40	2.89242		Nptx2	7.9874e-44	4.27091e-42	1.23682		Aldh1a1	7.48001e-06	2.49206e-05	-2.68538		Akna	0	0	2.63889
Ntng2	4.87933e-39	3.86384e-37	-1.57793		Ubxn7	2.5648e-41	9.9662e-40	2.26849		Zfp488	8.54792e-44	4.54631e-42	2.7343		Alg1	0	0	5.24843		Aldh16a1	8.37782e-11	7.54991e-10	-2.74947
Lrriq1	1.07946e-38	8.11249e-37	1.50657		Rnf216	2.6989e-41	1.04132e-39	1.67212		Zmym4	8.96831e-44	4.71969e-42	1.84876		Alg3	0.00629075	0.00923823	4.7401		Aldh1l2	0.00425881	0.00652297	4.87313
Cxxc5	3.28542e-38	2.33522e-36	-1.71148		Emb	4.03518e-41	1.52987e-39	2.07221		Hdac6	2.05991e-43	1.02985e-41	2.01625		Alox5ap	1.05984e-19	1.9487e-18	4.99292		Alg3	0	0	3.7669
Ppm1d	4.06386e-38	2.83725e-36	1.12243		Calm3	5.58628e-41	2.08179e-39	-1.04189		Zfp532	2.17201e-43	1.0805e-41	7.6939		Als2cl	0.000363865	0.00068376	-3.4336		Amer1	0.00244781	0.00393076	3.04063
Slc35g2	4.6216e-38	3.20766e-36	1.4657		Aplf	6.36708e-41	2.3647e-39	1.21934		Bc018473	2.32616e-43	1.15145e-41	2.76679		Amacr	0	0	2.70846		Amigo1	4.14693e-05	9.58565e-05	3.77894
Hipk2	1.04165e-37	6.9832e-36	3.27022		Akap8l	7.27933e-41	2.68523e-39	4.15474		Txnrd1	2.70451e-43	1.31274e-41	1.4571		Ambra1	0.0409733	0.04856	2.33424		Ampd3	5.79955e-05	0.000126499	-2.89467
Dcps	1.37879e-37	9.1395e-36	-1.02773		Mrps2	9.33167e-41	3.41921e-39	2.06027		Cars1	2.92871e-43	1.40789e-41	1.15855		Amer3	0.000191151	0.000372306	3.09181		Anapc1	0.00705611	0.0103368	2.69752
Mcm7	1.84954e-37	1.20567e-35	1.91237		Zfp804a	1.027e-40	3.73793e-39	1.01846		Pik3r2	3.1249e-43	1.49502e-41	-1.30041		Ampd3	4.07169e-05	9.69742e-05	-3.66399		Anapc10	0.000443871	0.000804947	-3.45579
Babam2	1.84954e-37	1.20567e-35	-1.70976		Tnks1bp1	1.28837e-40	4.6428e-39	2.12017		Zfp251	4.14784e-43	1.93805e-41	4.19406		Anapc7	0.0203402	0.0259529	2.5098		Angptl6	1.33337e-06	5.4262e-06	3.02787
Myo7a	2.49409e-37	1.59069e-35	1.80339		Syt15	1.44418e-40	5.18717e-39	1.40749		Rps6	4.18988e-43	1.94859e-41	-1.52748		Ankrd13b	7.02262e-35	3.47977e-33	3.60867		Ankhd1	0.00426916	0.00653708	2.05293
Dnmbp	1.30794e-36	7.75495e-35	2.20328		Dcaf11	2.22469e-40	7.83592e-39	1.46656		Sptlc2	8.15556e-43	3.64051e-41	2.73577		Ankrd13c	0.0338994	0.0409778	2.23215		Ankle1	6.52585e-06	2.11601e-05	-2.85342
Snhg6	3.58176e-36	2.01244e-34	1.0575		Taf1d	2.9743e-40	1.03428e-38	1.87998		Mir5109	1.03976e-42	4.60026e-41	1.55483		Ankrd16	0.00633028	0.00928695	2.19632		Ankrd16	4.66691e-13	5.10866e-12	3.93296
Rhpn1	6.57116e-36	3.64005e-34	2.30571		Ddx10	4.54124e-40	1.54473e-38	4.71694		Pin1	1.06639e-42	4.69728e-41	-2.0061		Ankrd23	0	0	4.13866		Ankrd28	0.0166875	0.0224488	2.26324
Plagl2	1.2573e-35	6.68239e-34	1.45786		Senp7	5.97254e-40	2.01902e-38	3.12549		Tyr	1.26537e-42	5.54932e-41	3.08269		Ankrd29	0.0129107	0.0173898	3.15117		Slf1	0.00977173	0.0138602	2.87829
Acot8	2.73857e-35	1.43611e-33	1.9148		Trp53bp2	6.29196e-40	2.1139e-38	1.20386		Zfp71-rs1	1.59468e-42	6.93269e-41	1.63407		Ankrd52	0.00960238	0.013404	4.08056		Ankrd42	0	0	2.96443
Slc38a7	4.28004e-35	2.20525e-33	1.68996		Nectin1	6.44999e-40	2.16035e-38	1.64348		Akr1a1	1.96742e-42	8.44303e-41	-1.63491		Anks6	7.2262e-08	4.531e-07	2.84192		Ankrd49	8.2229e-19	1.27823e-17	2.02753
B9d1	1.20069e-34	6.00296e-33	-1.58456		Iqcb1	6.47463e-40	2.16197e-38	2.37107		Klhl32	2.64986e-42	1.11797e-40	3.44521		Ap3s2	0.00850608	0.0120424	2.89433		Anks6	0	0	4.41916
Dgat2l6	1.43388e-34	7.13854e-33	4.25303		Pisd-ps3	9.21464e-40	3.0582e-38	1.49139		Ttc19	3.00719e-42	1.2634e-40	2.03042		Ap4b1	0	0	6.16291		Ano6	2.2209e-08	1.42257e-07	2.05662
Kif13a	1.87715e-34	9.15226e-33	2.08268		Fubp3	1.33441e-39	4.40193e-38	2.76354		Ywhab	3.51165e-42	1.46916e-40	-1.91837		Ap5m1	1.43654e-06	6.30115e-06	7.79188		Anxa5	7.92668e-16	1.02751e-14	-2.9392
Ctdsp1	2.1005e-34	1.01573e-32	-3.96321		Otud5	2.51667e-39	8.15415e-38	2.68701		Cluh	7.30497e-42	2.99996e-40	2.72997		Apod	0.000512584	0.000945898	-2.65494		Ap4s1	0.00608516	0.00903598	3.20211
Ddx20	3.00312e-34	1.43457e-32	2.45943		Zfp414	2.63596e-39	8.49028e-38	2.15385		Txnl4a	1.31484e-41	5.19647e-40	-2.26395		Aqp4	9.81835e-06	3.11154e-05	-3.6308		Apcdd1	0	0	4.71674
Ache	3.44288e-34	1.6249e-32	-4.7007		Tmem214	2.86573e-39	9.20321e-38	2.32291		Park7	1.77797e-41	6.86405e-40	-1.16016		Arhgap19	0.00656597	0.00960021	-2.83794		Apod	2.03546e-07	1.03735e-06	-4.06379
Aph1b	5.25905e-34	2.44297e-32	1.17438		Unk	3.80353e-39	1.20729e-37	1.62974		Zbed6	1.83136e-41	7.04298e-40	1.37479		Arhgap42	1.67993e-08	1.22552e-07	5.64287		Akr1b1	0	0	5.03364
Plekha6	7.61446e-34	3.44226e-32	-1.67444		Cecr2	8.83958e-39	2.74203e-37	1.54773		Cask	2.0543e-41	7.84007e-40	-4.06788		Arhgef1	0.0121025	0.0164145	2.05446		Arfip1	0	0	2.38377
Bmal2	9.4054e-34	4.21956e-32	-5.06218		Ppt1	9.4978e-39	2.93786e-37	-2.15155		Map3k2	2.26128e-41	8.59715e-40	1.68575		Arhgef18	0.00254216	0.00414213	2.31003		Arfip2	0.00144128	0.00241342	2.16854
Kcng2	1.20578e-33	5.3687e-32	-1.87651		Ctla2a	1.84592e-38	5.58328e-37	2.18684		Slc6a4	3.07249e-41	1.14207e-39	1.10948		Arid3b	2.10297e-22	4.46318e-21	6.79274		Arhgap21	0.0188902	0.0250995	2.58663
Glt8d2	2.29156e-33	9.93116e-32	-6.99346		Cpeb3	2.0548e-38	6.16385e-37	1.07103		Zftraf1	3.85876e-41	1.41852e-39	3.05765		Arid5a	0.0213602	0.0270801	3.68185		Arhgap27	1.51633e-05	4.18181e-05	-2.79167
Malat1	3.09585e-33	1.31395e-31	1.43658		Zswim8	2.34923e-38	7.00853e-37	2.46492		Sh3glb1	5.33138e-41	1.93849e-39	1.85552		Arl13b	0	0	6.60068		Arhgap30	2.50253e-07	1.24659e-06	-5.31132
Rwdd2a	2.29823e-32	9.09961e-31	-2.12383		Repin1	2.48555e-38	7.37493e-37	1.80779		Clk1	6.36554e-41	2.30612e-39	1.29278		Arl4d	0	0	3.46597		Arhgap32	0.00298362	0.00471071	2.34302
Mettl13	4.62764e-32	1.80203e-30	5.48862		Rcor2	2.81126e-38	8.27391e-37	8.8674		Cnih2	6.69302e-41	2.40732e-39	3.83205		Armc7	1.07654e-09	9.88148e-09	4.8151		Arhgef1	0.000281655	0.000524025	3.35058
Phyhd1	6.75028e-32	2.61995e-30	1.06751		Ergic1	3.10295e-38	9.10783e-37	1.27554		Coa6	6.95759e-41	2.49351e-39	2.89529		Arr3	5.72179e-07	2.82323e-06	3.71176		Arhgef10l	0.0084116	0.0121092	3.06782
Rad9a	9.1007e-32	3.49769e-30	1.49898		Alas1	3.26686e-38	9.56323e-37	-6.00205		Lnx2	7.8093e-41	2.78876e-39	6.41673		Arrdc1	0.0380113	0.0453761	3.40744		Arhgef25	0.000915961	0.00158347	2.36516
Ift122	1.17624e-31	4.49142e-30	-2.28972		Ctif	3.43711e-38	1.00347e-36	1.26399		Prkab2	8.41157e-41	2.98253e-39	3.9087		Arrdc4	0	0	7.12299		Arhgef9	4.51381e-05	0.000102825	2.02656
Trnau1ap	3.46568e-31	1.28187e-29	2.33688		Mrpl30	3.52259e-38	1.02569e-36	-1.1319		Fbxo21	1.17881e-40	4.13578e-39	-7.51686		Arsj	0.00271164	0.00438104	3.67701		Arid5b	0.00054828	0.000981106	4.0105
P3h1	1.46087e-30	5.1918e-29	3.32198		Katnal1	4.41135e-38	1.27765e-36	1.44877		Actg1	1.22209e-40	4.25771e-39	-1.1744		Arv1	0	0	7.12931		Arnt	0.00124534	0.00211183	3.47154
Fam217b	2.01824e-30	7.10844e-29	-1.49534		Tsc1	4.49696e-38	1.29558e-36	1.65414		Nudt9	1.49538e-40	5.10318e-39	2.18478		Asb1	0.0398274	0.0473218	2.55623		Bmal2	0	0	2.94545
Cc2d1a	4.04701e-30	1.40031e-28	-1.23646		Nfrkb	5.07599e-38	1.45472e-36	1.48379		Mbtps1	1.8762e-40	6.35936e-39	-5.91608		Asb7	0.00352471	0.00553484	2.49182		Arrb1	0.00725542	0.0105923	2.33353
Ankrd9	4.70823e-30	1.6149e-28	1.62301		Cenpw	5.28853e-38	1.50771e-36	1.51934		Rps3	1.93867e-40	6.5489e-39	-1.56803		Ascc2	0.00589419	0.00871386	3.27638		Arrdc1	0	0	5.16566
B3galnt2	6.53578e-30	2.22235e-28	1.51407		Ogfr	5.44291e-38	1.54384e-36	1.38015		Tmem167b	2.12253e-40	7.12212e-39	-5.11867		Asic2	7.90567e-12	9.00184e-11	2.33266		Arrdc4	4.99356e-08	2.96052e-07	2.47419
Aldh5a1	1.06314e-29	3.56362e-28	-1.40661		Actg1	5.78879e-38	1.63328e-36	-1.49999		Mc1r	2.82144e-40	9.3416e-39	1.97772		Atad2b	0.00434136	0.00668086	2.79615		Arsj	0	0	8.50196
Yif1a	3.86487e-29	1.23918e-27	1.43408		P2rx5	1.06688e-37	2.91961e-36	1.36303		Rmi2	3.4012e-40	1.11139e-38	1.81711		Atf7	0.0238267	0.0298767	2.13534		Arv1	7.12035e-13	7.7061e-12	2.03374
Zfp282	6.6073e-29	2.11273e-27	2.72939		Ai836003	1.66522e-37	4.48951e-36	1.44878		Kdm5b	3.59954e-40	1.16857e-38	1.92113		Atg10	0.0292229	0.0358436	3.77159		Asb11	0	0	7.2444
Trim13	9.3518e-29	2.95051e-27	3.49357		Dpf1	1.91044e-37	5.13795e-36	-1.83657		Thoc7	4.41406e-40	1.41917e-38	-1.14045		Atg16l2	1.09719e-15	1.64917e-14	3.49072		Asic2	0.00716414	0.0104738	2.10827
Ercc8	1.32239e-28	4.13869e-27	2.08448		Ppy	1.94334e-37	5.21361e-36	2.77203		Zfp275	5.29205e-40	1.6852e-38	1.56339		Atg2a	0.00456111	0.00697589	2.76964		Asl	0	0	3.45457
Fmnl3	2.85757e-28	8.66746e-27	6.12616		Anks3	3.41535e-37	8.98607e-36	1.97682		Idh3a	6.67331e-40	2.09883e-38	-3.41799		Atg4a	0	0	8.60187		Aspscr1	1.24203e-17	1.81974e-16	2.49986
Zfp748	3.32333e-28	1.00031e-26	-1.03075		Tubb2b	4.21451e-37	1.09567e-35	-1.39739		Adamts15	8.05911e-40	2.52611e-38	5.56992		Atp11b	0.00196029	0.00327481	3.4782		Ints13	0.000530724	0.000951918	2.85855
Ift140	3.6537e-28	1.09416e-26	-2.08124		Zmpste24	8.21416e-37	2.09068e-35	2.58719		Ryr1	8.68232e-40	2.7045e-38	1.70052		Atp1a2	4.87988e-09	3.96287e-08	-2.45264		Asxl1	0.0148153	0.0201663	3.12737
Rcan3	6.17936e-28	1.83192e-26	-4.83513		Zc3h3	8.64494e-37	2.19521e-35	1.28917		Psen1	1.15671e-39	3.54784e-38	-8.60466		Atp8a2	0	0	4.34772		Atad5	0.026453	0.0341706	3.08446
Pafah1b3	6.61259e-28	1.95055e-26	1.52804		Prxl2b	8.66678e-37	2.19565e-35	-1.14788		Lars2	1.95145e-39	5.84208e-38	1.48675		Atrip	4.07961e-32	1.58495e-30	2.0633		Atf7	1.96721e-05	5.18755e-05	6.49354
Nfkbiz	9.77608e-28	2.85515e-26	1.61837		Ywhaz	9.26944e-37	2.32674e-35	-1.19929		Snrnp200	2.45916e-39	7.23209e-38	2.56957		Atxn7l2	0.000752373	0.00135254	2.35783		Atg5	5.18524e-20	8.62103e-19	2.38325
Capn3	2.69787e-27	7.74504e-26	-2.96646		Spag1	1.08773e-36	2.71782e-35	3.23553		Malat1	2.62994e-39	7.71165e-38	2.38526		Cep131	0.0265296	0.032885	3.76195		Atic	0	0	5.75147
Scrt2	2.87487e-27	8.23316e-26	1.35931		Ofd1	1.29087e-36	3.19615e-35	6.15523		Ier3ip1	3.02114e-39	8.73075e-38	-1.14992		B3galt4	0	0	4.55969		Atp11c	0.0117409	0.0163719	2.68172
Naa10	3.34129e-27	9.52268e-26	-1.8925		Amh	1.42451e-36	3.5111e-35	-1.30935		Fbxw2	3.05897e-39	8.81459e-38	-2.66477		B3galt6	2.54253e-26	6.80374e-25	2.85993		Dmac2l	0.0116941	0.0163186	2.50123
Col4a1	3.45445e-27	9.82145e-26	4.47788		Gga3	1.72732e-36	4.22885e-35	1.62938		Cdc42	3.39304e-39	9.69342e-38	-2.54113		B3gntl1	0	0	2.31715		Dmac2	0.0261713	0.0338448	2.88638
Axin1	5.46572e-27	1.54282e-25	1.30852		Zfand2a	2.05071e-36	4.98703e-35	3.83703		Grb2	3.55277e-39	1.01208e-37	-1.2967		B4galnt4	0.000328354	0.00062092	4.01191		Atp6v0a2	0	0	5.49635
Bad	2.17763e-26	6.0173e-25	-1.32549		Zfp282	2.34459e-36	5.66384e-35	2.01679		Prkce	3.70626e-39	1.05281e-37	-1.66783		B4galt2	0.00865317	0.0122196	3.39816		Antxr1	0.0210977	0.0278103	3.36762
Ddb2	2.60686e-26	7.16978e-25	-2.97119		Tmem175	2.53684e-36	6.10126e-35	2.16346		D10wsu102e	4.50338e-39	1.26843e-37	-5.1816		Bc006965	0.0235714	0.0295895	3.34339		Atrip	4.70356e-05	0.000106201	4.57437
Nbeal1	5.58297e-26	1.49373e-24	1.75916		Rfx3	3.32165e-36	7.93635e-35	-2.45237		Wdr81	5.35849e-39	1.49664e-37	1.30391		Bc024978	2.44865e-07	1.33681e-06	5.5432		Atxn7l2	0	0	4.5733
Zbtb33	7.07899e-26	1.8812e-24	1.86879		Med26	3.49173e-36	8.3245e-35	1.85804		Msra	5.66495e-39	1.57344e-37	4.42663		Bc025920	0	0	5.12466		Avl9	0.000289892	0.000538056	3.08948
Gltp	1.14418e-25	3.01344e-24	1.74695		Kctd16	3.73666e-36	8.88901e-35	2.20273		Sh3gl2	6.50395e-39	1.79649e-37	-1.92986		Bc026590	0.0371618	0.0444301	2.91815		Axl	1.12104e-43	5.07003e-41	4.40971
Hycc2	1.25189e-25	3.28246e-24	1.88993		Rap2c	5.35921e-36	1.26115e-34	4.01211		Slc25a25	7.29506e-39	1.99845e-37	-3.22454		Bag2	0	0	6.16234		B4galt2	0.000762517	0.00133429	3.79237
Nudt9	1.25806e-25	3.29132e-24	-1.81352		Nsg2	5.38592e-36	1.26471e-34	-1.84214		Pik3c3	7.51055e-39	2.05186e-37	8.43886		Bahcc1	0.000737397	0.00132704	4.38779		B9d1	0	0	7.78805
Coq6	2.04522e-25	5.29202e-24	2.07693		Fads3	6.41698e-36	1.49716e-34	1.39778		Pebp1	8.68728e-39	2.36687e-37	-1.69322		Bbs7	0.0247664	0.0309157	5.09309		Bc005561	0.000639223	0.00113149	2.81372
Adcy10	2.16136e-25	5.56811e-24	-2.78365		Mnt	7.49613e-36	1.73734e-34	1.09049		Zkscan3	1.46592e-38	3.95086e-37	1.41529		Bbs9	0	0	7.54503		Bc018507	2.47724e-07	1.23668e-06	3.70081
Mkx	7.48331e-25	1.84333e-23	-2.5602		Pnpla6	7.49944e-36	1.73734e-34	1.97896		Anks1b	1.75448e-38	4.70322e-37	-1.3357		Bcl10	9.21799e-06	2.95006e-05	5.78848		Bc025920	7.17226e-17	9.94923e-16	-3.31863
Slc35e4	7.54851e-25	1.85166e-23	-1.43999		Sft2d1	7.51005e-36	1.73734e-34	2.70346		Slc22a23	2.15352e-38	5.75749e-37	8.57769		Bgn	1.80968e-06	7.62883e-06	-4.20431		Bc048403	0	0	3.88544
Mvd	8.63176e-25	2.10426e-23	1.40919		Fam163b	9.08134e-36	2.09196e-34	-1.8049		Polr2l	2.63789e-38	6.99636e-37	1.98754		Bhlha9	0	0	4.89264		Bc065397	0	0	5.53518
Lzic	1.03227e-24	2.50098e-23	1.53018		Shank2	9.41447e-36	2.16414e-34	2.22189		Myh7b	2.88968e-38	7.62372e-37	1.08999		Bin3	6.32859e-38	4.68395e-36	2.00427		Bc068281	0	0	3.89238
Znrf2	1.18069e-24	2.85471e-23	2.19815		Fam210b	9.81708e-36	2.24723e-34	4.81906		Ndufb4	2.9493e-38	7.76054e-37	-1.82814		Bnip2	0.033607	0.0406417	2.77219		Bag2	0	0	4.52232
P4ha2	1.61023e-24	3.86161e-23	3.86301		Tmem160	1.0683e-35	2.44032e-34	-1.85654		Slc6a17	4.06278e-38	1.05791e-36	-2.32021		Brpf1	0.00865293	0.0122196	2.18706		Baz1a	0.0156325	0.0211731	3.54527
Purg	2.62104e-24	6.20997e-23	2.05904		Tmem63c	1.27004e-35	2.88307e-34	1.47557		Cog7	4.9602e-38	1.27499e-36	-1.57824		Bud13	1.58844e-13	2.06851e-12	4.89037		Bbs5	6.06002e-05	0.000131512	4.39104
Cxxc4	3.5388e-24	8.33418e-23	-3.38139		Srrm4	1.33491e-35	3.02403e-34	2.21896		Msantd4	5.00288e-38	1.28266e-36	2.48996		C87436	0	0	9.34752		Bbs7	0.00286404	0.00453753	4.47656
Dusp12	5.40033e-24	1.26425e-22	3.19502		Cox4i1	2.0832e-35	4.62326e-34	-1.07299		Ppp4r4	5.18078e-38	1.3215e-36	1.02186		Cabyr	5.70649e-11	6.05551e-10	6.33105		Bcl2l13	0.00271721	0.00433003	5.04019
Tagap1	6.22487e-24	1.44581e-22	1.14955		Frat1	2.94029e-35	6.47278e-34	1.99		Fbxo33	7.62991e-38	1.91687e-36	2.13573		Cacna1b	0.005115	0.00771903	2.36305		Bcorl1	0.000269099	0.000501373	-2.62591
Gpr45	1.07327e-23	2.45893e-22	-1.72592		Pacsin1	4.12172e-35	8.98304e-34	-1.22898		Kcnq2	8.37443e-38	2.09864e-36	-2.35207		Cacna1h	0.00476654	0.00725685	3.1609		Bhlha9	2.94927e-12	3.03717e-11	-4.99697
Slc26a11	1.29546e-23	2.9565e-22	1.22167		Gramd1a	4.44936e-35	9.6778e-34	3.13717		Ggnbp2	1.00658e-37	2.50992e-36	-2.50873		Cacng5	1.0631e-09	9.76585e-09	6.35661		Bhlhe41	6.27092e-07	2.80831e-06	2.05533
Zfp658	1.75696e-23	3.96374e-22	-3.86641		Nfib	4.78757e-35	1.03927e-33	-1.09939		Becn1	1.40914e-37	3.49628e-36	-4.03658		Cacng7	0	0	3.07464		Bicd1	0.000413821	0.000754147	2.55335
Svil	2.17977e-23	4.88957e-22	5.85126		Nrn1	6.69386e-35	1.44733e-33	-1.22161		Maea	1.94316e-37	4.76217e-36	4.73607		Cacng8	0.00488998	0.00742159	2.30011		Bid	0	0	8.23562
Zfp948	4.89819e-23	1.07623e-21	3.82171		Mgat4c	6.84483e-35	1.47414e-33	5.33227		Akap5	2.61951e-37	6.35739e-36	1.08635		Cactin	0.0046951	0.00716022	2.95513		Bin3	0.0083856	0.0120763	2.97066
Blvrb	4.99738e-23	1.09599e-21	4.43561		Srsf4	6.93341e-35	1.49027e-33	1.7046		Elovl4	2.7349e-37	6.58946e-36	1.50151		Acod1	0	0	5.64774		Bivm	0	0	4.64407
Krcc1	5.06281e-23	1.10828e-21	2.81265		Rhof	7.59052e-35	1.62511e-33	1.73372		Coasy	4.00601e-37	9.55992e-36	1.00543		Camk2d	6.21464e-05	0.000136863	-2.44533		Boc	3.18704e-13	3.53596e-12	-2.75875
Tmem123	6.19992e-23	1.3472e-21	1.50525		Tnr	9.42408e-35	1.99422e-33	1.63736		Dcaf7	4.06263e-37	9.67196e-36	-1.01958		Car7	1.66424e-07	9.42544e-07	4.372		Brpf1	0.0210784	0.0277891	2.00774
Lage3	7.80467e-23	1.67736e-21	-1.43988		Slc50a1	1.03789e-34	2.18357e-33	1.64403		Atp5po	4.58297e-37	1.08848e-35	-1.12639		Card10	0.00027867	0.000531262	4.72375		Btrc	0.000377005	0.000690013	2.24723
Entpd7	9.33927e-23	1.99627e-21	1.28987		Sv2b	1.1782e-34	2.46924e-33	1.66886		Cend1	5.1873e-37	1.2233e-35	-1.63475		Card6	0.00197757	0.00330084	6.28999		Bud13	0	0	5.21887
Gadd45b	1.17028e-22	2.48347e-21	4.16637		Isyna1	1.85717e-34	3.86256e-33	5.1978		Drg2	5.48863e-37	1.28526e-35	1.27523		Cdkn2aip	0.00499391	0.00755482	2.41101		C2cd5	0.000439489	0.000797882	3.38246
Klhdc1	1.19603e-22	2.53356e-21	1.03426		Drd5	2.02002e-34	4.19328e-33	3.30024		Matr3	5.86249e-37	1.36323e-35	-1.96156		Cars1	0.000554973	0.0010177	2.47187		C3ar1	0.00335903	0.00525427	-3.35173
Cpne6	1.32663e-22	2.80517e-21	-1.41896		Snrnp40	2.48406e-34	5.12731e-33	2.24045		Pisd-ps1	8.40983e-37	1.92867e-35	6.93426		Casp2	0.00110274	0.00193074	4.83244		C5ar2	2.80569e-05	6.95031e-05	-4.12711
Rhobtb3	2.43837e-22	5.07413e-21	1.4162		Klhl42	2.57316e-34	5.28127e-33	2.50645		Gpat4	9.59531e-37	2.1855e-35	2.31035		Cass4	2.35394e-05	6.24194e-05	4.97648		Cables2	0.00137965	0.00232107	3.13975
Zfp518a	2.45507e-22	5.09093e-21	1.44643		Ptbp1	2.79552e-34	5.70547e-33	1.98708		Mapre3	9.98094e-37	2.26303e-35	-1.80066		Cblb	0.00239995	0.00393509	2.47927		Cacfd1	0.00400183	0.00615567	2.75797
Pappa	3.01458e-22	6.21835e-21	7.2055		Ccsap	3.59973e-34	7.27879e-33	1.68909		Rab4a	1.34372e-36	3.02609e-35	-8.31768		Cbx8	0	0	4.59319		Cacna1b	0.0129067	0.0178169	2.33167
Nln	3.23178e-22	6.65475e-21	-2.31572		Ddr1	3.66079e-34	7.38856e-33	1.34028		Dcaf10	1.46757e-36	3.28283e-35	2.20735		Cc2d1b	0.000188137	0.000366924	4.21613		Cacna2d3	4.82713e-09	3.51599e-08	2.70658
Sec14l3	3.57112e-22	7.31523e-21	-3.90451		Atat1	3.67033e-34	7.39415e-33	1.68288		Nap1l4	1.51854e-36	3.38925e-35	-2.39683		Sgf29	0.000638056	0.00116095	3.77791		Cacng8	2.36429e-07	1.18649e-06	2.05005
Rn45s	4.07071e-22	8.30974e-21	1.48197		Serf2	4.41668e-34	8.86503e-33	-1.07416		Enho	1.59571e-36	3.55357e-35	2.31003		Vps50	0.00152992	0.00261066	2.31414		Cactin	0	0	2.66165
Trim66	4.62495e-22	9.40859e-21	1.32868		Gba1	6.82623e-34	1.35273e-32	2.02621		Rnf141	1.7677e-36	3.91911e-35	-5.26854		Cfap210	0	0	6.20801		Camkmt	0	0	7.79809
Crlf1	5.12935e-22	1.04167e-20	-1.48737		Scn2b	7.77784e-34	1.53852e-32	-1.82824		Zzz3	4.43296e-36	9.57347e-35	6.15066		Ccdc66	2.47713e-09	2.12061e-08	2.25255		Camsap3	0	0	2.48733
Map3k9	5.15466e-22	1.04501e-20	1.21562		Hs3st1	1.3228e-33	2.56548e-32	8.65053		Ivns1abp	4.86487e-36	1.0461e-34	-2.71072		Ccdc93	0.00122526	0.00212805	4.27574		Cant1	1.61149e-43	6.37484e-41	4.57646
Grem2	9.40701e-22	1.88444e-20	3.05208		Srebf2	1.506e-33	2.90529e-32	1.87586		Syn1	5.06649e-36	1.08247e-34	-2.65674		Yju2	0.0148471	0.0196851	2.3952		Cars2	0	0	4.9037
Socs6	1.07871e-21	2.15724e-20	3.37463		Abtb1	1.63514e-33	3.13781e-32	8.43463		Rprd1a	5.72325e-36	1.21759e-34	-1.51193		Ccl25	1.80797e-06	7.62438e-06	4.37691		Casp2	0	0	5.51167
Olfm1	2.37741e-21	4.72241e-20	-1.35552		Tnfsf10	2.21778e-33	4.22617e-32	1.43207		Ndufb9	7.74542e-36	1.62022e-34	-2.26453		Ccnd3	0	0	4.55762		Cass4	0.00620638	0.0092001	4.0412
Brip1	3.85369e-21	7.57827e-20	1.65716		Dennd1a	2.48065e-33	4.71064e-32	3.11857		Lrrc17	1.04688e-35	2.17173e-34	1.21062		Ccnyl1	0.000532497	0.000979399	6.83086		Erc2	0.0275009	0.0354325	3.82618
Tor1aip1	4.43043e-21	8.6691e-20	1.35092		Gpld1	3.50119e-33	6.54615e-32	2.86911		Scamp1	1.05005e-35	2.1738e-34	-2.02797		Cd209c	0	0	3.94185		Cc2d2a	4.46797e-13	4.90025e-12	2.32832
Cpeb2	5.53716e-21	1.07633e-19	1.01733		Syn1	3.6185e-33	6.75392e-32	-1.30226		Gopc	1.13424e-35	2.33841e-34	1.81526		Cd46	0.0269998	0.03339	5.29325		Yju2b	0.0333846	0.0422678	2.74746
Zfp128	1.24539e-20	2.36625e-19	1.18641		Plekhm1	5.09313e-33	9.39389e-32	2.40976		Jun	1.38848e-35	2.83334e-34	-3.84236		Cdc34	6.80575e-05	0.000147273	2.05298		Ccdc137	0.0108629	0.0152757	2.57672
Trpm2	1.68321e-20	3.17763e-19	-4.22308		Naa38	7.30757e-33	1.33878e-31	-1.90975		Fnip1	1.57599e-35	3.20292e-34	-2.36641		Cdc42bpb	5.45339e-14	7.33854e-13	2.18528		Ccdc142	0	0	4.30524
Camk2d	5.86302e-20	1.08263e-18	1.30044		Ttc9b	9.06221e-33	1.64643e-31	-1.48685		45184	1.96649e-35	3.96431e-34	-3.52882		Cdk18	0.00677065	0.00985266	-3.09969		Ccdc149	0.0216182	0.028431	2.13101
Camk2b	6.51728e-20	1.19778e-18	-1.51855		Xab2	1.09541e-32	1.98026e-31	2.71631		Arl8b	3.18749e-35	6.36163e-34	-1.47268		Cdk5rap3	0.0079617	0.0113542	2.24752		Ccdc159	0	0	5.48096
Sstr1	8.29855e-20	1.52041e-18	-1.36714		Ints6l	1.11649e-32	2.01503e-31	3.48131		Cltc	3.45158e-35	6.8613e-34	-1.04327		Ceacam20	1.48764e-05	4.3189e-05	-2.79509		Ccdc171	0	0	2.58008
Arfip1	8.64249e-20	1.57853e-18	1.38314		Eml6	1.19219e-32	2.1481e-31	1.0936		Eif1ad	3.47395e-35	6.89206e-34	1.86425		Cebpg	0.00342063	0.00538588	3.33204		Ccdc22	9.84392e-10	7.91376e-09	3.36668
Btbd6	1.11849e-19	2.03032e-18	-1.48812		Maged1	1.51967e-32	2.73366e-31	-1.15746		Ncald	4.71758e-35	9.28566e-34	-2.41901		Hdhd5	0	0	10.6309		Ccdc34	0.00849661	0.0122193	2.17099
Kcnh7	1.14134e-19	2.06862e-18	5.75644		Arf3	1.60519e-32	2.878e-31	-1.08382		Ppp1r11	5.02911e-35	9.86002e-34	-1.82877		Celf3	0.0115812	0.0157919	2.00349		Ccdc51	0	0	5.73213
Srrd	1.17517e-19	2.12666e-18	-3.94612		Sowaha	1.81584e-32	3.24504e-31	-2.06038		Fbxo9	5.59905e-35	1.09346e-33	-1.81377		Cenpq	0.000157257	0.000311056	7.07013		Bicdl1	4.06074e-11	3.79355e-10	5.35559
Sacs	1.31422e-19	2.3674e-18	1.22212		Rasa2	2.12657e-32	3.78174e-31	2.32301		Ddx3x	5.97314e-35	1.16197e-33	-2.23634		Cenpw	5.32691e-05	0.000120373	-3.86168		Ccdc66	6.46994e-19	1.01676e-17	9.39392
Josd2	2.21332e-19	3.94124e-18	-1.7198		Rpl18	2.13002e-32	3.78174e-31	-1.88365		Kif5a	6.21634e-35	1.20694e-33	-2.49105		Cep104	0.000263522	0.000503699	3.89357		Cenatac	0.00199362	0.00325516	2.25751
Frzb	2.21463e-19	3.94124e-18	-3.02301		Zfp523	2.17066e-32	3.84763e-31	9.73849		Fsd1l	7.87683e-35	1.52341e-33	5.80441		Cntrl	0.000287791	0.000548025	4.68026		Ccdc86	0	0	5.44035
Kdm1b	4.63939e-19	8.20693e-18	3.50798		Ube2j1	4.34542e-32	7.616e-31	1.93365		Trl-aag2-3	8.22628e-35	1.58182e-33	1.17166		Cep350	0.005645	0.00839215	2.80424		Ccdc90b	0	0	5.50949
Dchs1	4.91771e-19	8.68623e-18	1.21234		Rassf5	5.89233e-32	1.0245e-30	2.99807		Dop1b	8.44096e-35	1.61343e-33	-2.20066		Cep68	0.0014672	0.00251354	3.61995		Ccm2	5.94705e-11	5.4449e-10	2.48087
Efna2	5.50448e-19	9.70812e-18	-3.78019		R3hdm4	6.63444e-32	1.14987e-30	-1.23847		Erp44	8.46848e-35	1.61343e-33	4.63419		Cep76	0.000241954	0.000464371	6.01795		Ccnd3	0	0	7.96795
Pnpla2	6.32273e-19	1.1085e-17	3.1049		Gfra4	6.91109e-32	1.19402e-30	-5.99238		Polr2i	1.04121e-34	1.96435e-33	2.68367		Cers6	1.22734e-08	9.26138e-08	2.51881		Cct6a	0.00401297	0.00617199	2.1563
Igfbp5	6.89364e-19	1.2068e-17	-2.60844		Malat1	7.18415e-32	1.23924e-30	1.89647		Cpsf7	1.24776e-34	2.34518e-33	1.54829		Cetn4	0.00198537	0.00331244	-2.76914		Ccz1	0.0108974	0.0153167	2.17135
Hsp90aa1	8.01182e-19	1.40047e-17	1.71446		Ibtk	7.33805e-32	1.26379e-30	1.61756		Cdc37	1.61852e-34	3.00252e-33	-1.06026		Chadl	0	0	6.34739		Cd151	4.04598e-25	8.99525e-24	-5.61804
Acadl	1.08304e-18	1.87924e-17	7.69202		Rgs19	8.7395e-32	1.50278e-30	3.73182		Prkcd	1.70275e-34	3.15293e-33	2.1149		Chat	2.82716e-08	1.9679e-07	-3.46355		Cd276	0	0	4.69072
Shc1	1.1996e-18	2.06628e-17	3.70108		Rbm26	8.86339e-32	1.5193e-30	2.56281		Alad	2.94689e-34	5.3672e-33	1.88999		Chrd	0.00855521	0.0121075	3.04065		Cd46	0	0	2.34792
Zdhhc18	1.23504e-18	2.12113e-17	1.76011		Sptbn1	1.09514e-31	1.86259e-30	1.62078		Rnf181	5.04682e-34	8.97921e-33	-1.11762		Chst11	0	0	4.16643		Cdan1	0	0	7.98216
Sh3pxd2b	1.29319e-18	2.21779e-17	2.38422		Fgd4	1.18155e-31	2.00643e-30	2.92509		H3-3a	5.18123e-34	9.20198e-33	-1.48273		Ciita	0.0204111	0.0260263	3.15245		Cdc42ep3	0.00322025	0.00505372	-4.74003
Prrc2c	1.46002e-18	2.49663e-17	1.03637		Ddx46	2.28999e-31	3.78855e-30	1.26739		Plekhj1	6.22671e-34	1.09614e-32	-2.30894		Clcc1	5.31155e-06	1.89717e-05	2.65379		Cdc42se1	9.80337e-14	1.12464e-12	3.544
Qsox1	2.31514e-18	3.91912e-17	2.07927		Dnajb6	2.62108e-31	4.3232e-30	-1.25299		Ppp1r16b	8.43973e-34	1.47275e-32	1.06309		Clcn6	0.0131837	0.0177044	3.4569		Cdc7	0	0	6.13873
Rpp30	2.34022e-18	3.9559e-17	2.63221		Pcyt1a	3.40092e-31	5.55908e-30	2.16676		Rab28	1.11423e-33	1.92755e-32	-4.15197		Cldn11	5.49597e-06	1.94994e-05	-3.83715		Cdh10	0.00879157	0.0126103	2.03768
Mrpl14	2.67106e-18	4.48306e-17	-1.15052		Tmem45b	3.77268e-31	6.14833e-30	1.56547		Atp6v1f	1.38398e-33	2.38593e-32	-1.27823		Clic4	2.38215e-05	6.29819e-05	-3.96866		Cdh12	0.015023	0.0204092	2.10727
Mettl21a	3.42151e-18	5.7263e-17	1.49789		Gns	4.15177e-31	6.735e-30	1.45851		Klhl18	1.57424e-33	2.69996e-32	4.84474		Clk2	8.52834e-06	2.778e-05	2.64298		Cdk20	0	0	4.10029
Cenps	3.46869e-18	5.79703e-17	-2.13987		Rps7	5.0775e-31	8.17716e-30	-1.17349		Clstn1	2.04519e-33	3.49571e-32	-5.08971		Clp1	0.000687725	0.00124339	7.24459		Cdk2ap1	0.0231701	0.0302811	2.93937
Pus7l	3.997e-18	6.65171e-17	5.49966		Mbd2	5.67191e-31	9.08088e-30	1.02186		Ptcd2	2.11276e-33	3.60504e-32	3.29805		Cluap1	0.00206204	0.00342668	2.07049		Cdkal1	1.84094e-07	9.50034e-07	2.60239
Nipa1	4.38834e-18	7.28243e-17	1.73247		Rab3a	5.94127e-31	9.48432e-30	-2.18655		Ndrg3	2.43046e-33	4.11902e-32	-2.66929		Cmss1	6.75662e-17	1.08682e-15	2.35234		Cdkl3	0.00116964	0.00199288	4.48137
Abca7	5.85533e-18	9.66252e-17	2.93776		Zfhx2	7.32295e-31	1.16389e-29	1.04995		Trmt112	3.04158e-33	5.12863e-32	-1.98581		Cnpy4	3.03051e-08	2.08832e-07	5.84366		Cdkn2aip	0.0140214	0.0191858	2.11278
Cdc25a	8.14411e-18	1.33092e-16	1.89869		Nip7	8.02949e-31	1.27248e-29	1.05116		Gtf2a2	3.2945e-33	5.53642e-32	-6.25893		Cntnap5a	2.90616e-23	6.46096e-22	5.96835		Cdr2l	0.00949687	0.0135205	2.50845
Gm5148	9.10159e-18	1.48533e-16	-4.20839		Tram1	8.19655e-31	1.29591e-29	3.22477		Nip7	3.58231e-33	5.98989e-32	2.22917		Colq	0.000904799	0.00160924	-2.03085		Chek2	0.0309204	0.0394263	3.48424
Urm1	1.07766e-17	1.75141e-16	1.93059		Smc2	9.99439e-31	1.56569e-29	7.43594		Mfn1	3.60652e-33	6.0203e-32	2.25972		Cpne1	0.0164879	0.0215778	2.20207		Cdyl2	1.6648e-05	4.52038e-05	4.70989
Cplx2	2.28247e-17	3.66906e-16	-1.72905		Rnf8	1.01159e-30	1.58246e-29	2.79428		Trim41	3.62782e-33	6.04576e-32	2.96777		Cpxm1	5.77313e-25	1.38388e-23	4.59953		Ceacam20	0.00233322	0.00376254	-2.5238
Apba3	2.8613e-17	4.58081e-16	2.68353		Gramd4	1.30423e-30	2.02862e-29	1.33253		Trappc4	4.06315e-33	6.73755e-32	-2.22655		Cr1l	0.00151686	0.00259026	4.9999		Cecr2	0.00613499	0.00910369	3.14808
Spaca6	3.01784e-17	4.82486e-16	1.82421		Pkia	1.77884e-30	2.74339e-29	-1.48898		Dbndd2	4.35458e-33	7.20885e-32	-4.47459		Creb3l4	0.0038069	0.00594127	2.13178		Tmem121b	0.000240746	0.000450471	-3.68933
Aqp4	5.06237e-17	8.00683e-16	1.01199		Pex11a	2.12531e-30	3.26389e-29	2.01872		Arcn1	4.36502e-33	7.21419e-32	-2.22558		Crhr1	0	0	5.41713		Celf3	0.00673115	0.00991522	2.98978
Topbp1	5.42561e-17	8.5242e-16	2.68945		Mrpl57	3.13555e-30	4.77505e-29	-2.33858		Kalrn	4.4229e-33	7.29778e-32	-1.54896		Crlf1	0.00134492	0.00232004	3.01534		Celsr3	0.000129909	0.000254841	2.27931
Hcn2	6.21942e-17	9.73248e-16	-2.34237		Hnrnpc	3.27486e-30	4.97333e-29	-2.0418		Mrpl35	4.46539e-33	7.35576e-32	-1.33471		Crlf3	6.60374e-07	3.19901e-06	7.25084		Cenpv	0	0	8.59053
Pcdhb16	7.49458e-17	1.16969e-15	6.59947		Ubxn2a	3.69157e-30	5.58287e-29	2.92801		Ywhaz	4.5544e-33	7.49004e-32	-1.36819		Crtc2	5.46889e-07	2.71218e-06	4.13209		Cep128	0	0	5.63636
Tefm	1.07017e-16	1.65708e-15	1.02603		Gle1	3.94192e-30	5.945e-29	3.2722		Adgrl3	4.59527e-33	7.54485e-32	9.11872		Cryl1	0.0100741	0.013973	3.34664		Cep135	0	0	4.73286
Dse	1.60907e-16	2.47206e-15	1.97778		Agk	5.44949e-30	8.12883e-29	2.97		Neto1	7.39961e-33	1.20503e-31	2.22233		Csf2ra	1.96994e-32	7.8892e-31	3.07128		Cep350	0.00483375	0.00732436	3.2283
Lmo1	2.59758e-16	3.92431e-15	-2.35114		Klhl32	6.28022e-30	9.30444e-29	1.82804		Pacsin2	1.27853e-32	2.03892e-31	1.04771		Csgalnact2	0.0181824	0.0235022	4.19385		Cep44	0	0	5.45589
Klhl4	3.68712e-16	5.52086e-15	6.2438		Vps9d1	7.77881e-30	1.14745e-28	2.27197		Polr3gl	1.52029e-32	2.41675e-31	1.46757		Csmd3	0.00790485	0.0112841	2.11444		Cep76	0.00405453	0.00623089	4.15596
Cdh10	3.7098e-16	5.54777e-15	3.75235		Phyhip	7.98366e-30	1.17327e-28	-1.32787		Spata13	1.62098e-32	2.56562e-31	1.81927		Csrp2	0	0	4.37465		Cep78	0	0	5.10718
Scgn	8.17615e-16	1.20137e-14	1.1525		Pdcl3	8.21259e-30	1.20529e-28	1.79951		Cyfip2	1.62163e-32	2.56562e-31	-1.11046		Ctc1	0	0	4.40798		Cerkl	0	0	5.88364
Negr1	8.70008e-16	1.27518e-14	-1.19045		Ano3	8.79094e-30	1.28843e-28	-1.57209		Zfp385b	2.07428e-32	3.27141e-31	5.76149		Ctnnal1	0.04141	0.0490136	3.44978		Cers2	4.41224e-05	0.000101032	3.7841
Hsd17b8	9.57889e-16	1.39705e-14	-1.86855		Ccnt1	1.06951e-29	1.56123e-28	7.34531		Igf2bp3	2.07877e-32	3.27333e-31	4.16089		Ctns	0.0222369	0.0281039	3.43196		Chac2	1.71222e-08	1.12436e-07	-2.54792
Syne1	1.04036e-15	1.51173e-14	1.41781		Wdr17	1.82616e-29	2.63406e-28	1.09158		Kpna1	2.27912e-32	3.58316e-31	-2.10274		Cttnbp2nl	1.85189e-05	5.1525e-05	-4.51797		Chadl	3.15165e-21	5.52839e-20	5.65832
Rida	1.05386e-15	1.52946e-14	-4.06835		Dzip1	2.03931e-29	2.92989e-28	4.82704		Gid4	2.47577e-32	3.88012e-31	-3.14944		Cux1	0.000523002	0.000963586	3.64335		Chat	0.00812245	0.0117445	-2.29436
Slc52a2	1.59032e-15	2.27445e-14	1.04515		Ercc1	2.31563e-29	3.30083e-28	2.29919		Arfgap3	2.4895e-32	3.89554e-31	-2.68634		Cyp2u1	0	0	5.96022		Chchd5	0	0	4.06712
Rad23b	2.4255e-15	3.41917e-14	1.70122		Rbm18	2.70678e-29	3.83835e-28	1.74802		Dynll1	2.7534e-32	4.29505e-31	-1.84181		Cyp4f13	1.32645e-10	1.35236e-09	4.79687		Chd1l	0	0	2.90376
Cdk5rap2	2.49236e-15	3.50923e-14	1.31115		Snapin	3.42658e-29	4.82771e-28	-3.3471		Prickle2	3.02929e-32	4.71804e-31	-2.19236		Cyp4f16	0.000108076	0.000221067	5.59031		Chd9	0.00158527	0.00263035	2.1923
Cenpl	3.47464e-15	4.8412e-14	-1.34591		Ncapd3	3.89709e-29	5.45542e-28	1.59175		Fbxw8	3.7737e-32	5.86831e-31	1.87888		D11wsu47e	1.5075e-40	1.95875e-38	4.6139		Chek1	0	0	5.79833
Btbd9	3.71186e-15	5.15857e-14	-1.37967		Rbfa	4.58471e-29	6.3448e-28	-7.96909		Arhgef3	4.52303e-32	7.01174e-31	-2.73905		D19bwg1357e	0.0107182	0.014744	2.04806		Chka	0.000147161	0.000285164	5.34247
Prdm5	3.88129e-15	5.38768e-14	-3.12043		Mrpl55	5.61409e-29	7.70183e-28	-3.14716		Fnbp4	4.55922e-32	7.05691e-31	2.89915		D5ertd605e	0.0329549	0.0399476	3.88456		Chpf2	5.34547e-16	7.01639e-15	2.34933
Pradc1	6.26507e-15	8.61557e-14	1.40163		Epas1	5.84744e-29	8.00102e-28	-1.73907		Psmb11	4.66931e-32	7.21614e-31	2.45822		Dalrd3	6.12729e-05	0.000135244	5.13174		Chrd	0.0113049	0.0158293	2.93058
Camkv	6.86351e-15	9.41658e-14	-2.49654		E2f6	8.93967e-29	1.20957e-27	2.81338		Cited2	5.1403e-32	7.90736e-31	1.434		Dapk3	0.00669871	0.00976012	4.58094		Cib1	2.56054e-11	2.42164e-10	3.87749
Map7	9.45854e-15	1.2887e-13	-1.93781		Ncoa3	1.01286e-28	1.362e-27	2.66445		Atp5pf	5.75693e-32	8.82877e-31	-1.59668		Ackr1	0.00434281	0.00668221	2.53715		Ciita	0.0251515	0.03264	2.57541
Myadml2	9.47916e-15	1.29002e-13	4.61205		Ppig	1.16004e-28	1.55226e-27	1.06361		Sec61b	6.45067e-32	9.86242e-31	-3.38457		Tspo	6.81913e-08	4.31043e-07	-2.17761		Utp4	0.00934082	0.0133281	2.13582
Cacng8	1.13882e-14	1.54093e-13	-1.51459		Ensa	1.23504e-28	1.6506e-27	-1.26349		Ruvbl1	7.35633e-32	1.12299e-30	-3.71421		Dcaf12	2.27942e-05	6.09547e-05	3.8358		Clasrp	0.0106481	0.0150086	2.22926
Dusp22	1.60406e-14	2.14828e-13	-5.54635		Bcan	1.54615e-28	2.05382e-27	2.38252		Lsm14b	8.38782e-32	1.27656e-30	1.93217		Dchs1	0	0	3.84462		Clk3	6.16833e-16	8.08721e-15	3.66562
Add2	1.654e-14	2.21265e-13	-1.15047		Eif4a2	1.93467e-28	2.55437e-27	-1.67989		Add2	9.34691e-32	1.41178e-30	-1.79634		Dcn	2.74681e-05	7.0627e-05	-4.10142		Clmp	9.72225e-37	5.93264e-35	-3.2958
Grm5	1.72307e-14	2.29983e-13	-1.14291		Khk	2.16027e-28	2.83851e-27	8.20993		Cpne4	9.52853e-32	1.43704e-30	-2.92458		Dcx	0.0047465	0.00723012	3.05814		Cluap1	2.14873e-10	1.84646e-09	4.19073
Snap91	1.93803e-14	2.56931e-13	1.23805		Smyd5	2.22729e-28	2.91954e-27	3.07724		Dgkb	1.28232e-31	1.91658e-30	-2.50781		Ddi2	0	0	3.54875		Cmc2	0.00528619	0.00795216	2.28506
Arhgef25	2.17927e-14	2.87299e-13	-2.17342		Aldh5a1	2.3032e-28	3.01181e-27	1.94741		Emx2	1.41946e-31	2.11208e-30	4.60215		Ddx23	0.0317231	0.0386145	2.72322		Cmss1	0	0	5.96879
Sema5a	2.39872e-14	3.15524e-13	-2.05359		Ftsj1	2.50583e-28	3.26505e-27	-2.60034		Pcsk1n	1.78037e-31	2.64123e-30	-1.95077		Ddx51	0.00121047	0.00210393	3.7151		Cnot2	0.00243793	0.00391653	3.08366
Golim4	2.50358e-14	3.28584e-13	2.18479		Cisd1	3.19727e-28	4.14129e-27	-1.48284		Nom1	4.92728e-31	7.10936e-30	3.778		Deaf1	2.2419e-31	8.27028e-30	2.93367		Cntln	7.5531e-08	4.31305e-07	6.0073
Arpp21	2.55833e-14	3.3486e-13	2.12339		Zfp949	3.29862e-28	4.26245e-27	2.01736		Alas1	5.85843e-31	8.40436e-30	2.27644		Dhodh	0.00347445	0.0054673	2.1508		Cntn4	0	0	4.323
Sh3rf1	2.55991e-14	3.3486e-13	3.00203		Zfp651	3.44477e-28	4.44078e-27	2.16239		Abcb9	8.10659e-31	1.15632e-29	4.13897		Dhrs4	0	0	5.60168		Cntnap5a	0	0	4.53254
Elovl2	3.0933e-14	4.03569e-13	3.65899		Sptssa	3.52136e-28	4.52883e-27	2.57386		Atp6v1g2	9.39929e-31	1.33689e-29	-2.75721		Utp25	0.0194587	0.0249261	3.03317		Cog2	5.76269e-05	0.000125851	6.19174
Ccnjl	4.15023e-14	5.38116e-13	-3.24362		Apba1	4.2032e-28	5.36781e-27	3.76762		P4hb	9.58586e-31	1.36149e-29	-3.80743		Dio2	0.000118469	0.000239684	-3.42934		Cog4	0.00689175	0.0101193	2.26962
Slc7a3	4.69241e-14	6.03317e-13	3.70267		Zw10	4.23133e-28	5.39741e-27	1.29661		Stt3a	9.71211e-31	1.37747e-29	2.33379		Dis3	0.0139086	0.0185797	2.14956		Cog5	0	0	7.79139
Camta1	5.38762e-14	6.86485e-13	-1.23425		Kif1c	4.91278e-28	6.23027e-27	1.92434		Cnpy3	1.00127e-30	1.41808e-29	-2.99845		Dkk2	1.29654e-07	7.58086e-07	-2.07069		Col22a1	0	0	8.20229
Pax6	5.55605e-14	7.0642e-13	-3.74523		Rims1	5.75114e-28	7.27655e-27	1.52183		Rab14	1.06155e-30	1.495e-29	-1.41582		Dmap1	0.00186576	0.0031339	3.17955		Col4a2	1.34019e-10	1.18358e-09	6.81458
Pcdh19	5.64398e-14	7.16828e-13	-1.5364		Psph	7.90169e-28	9.9744e-27	1.3826		Elof1	1.17212e-30	1.64607e-29	4.17022		Dnajb12	0.0088319	0.0124374	2.69951		Colq	0.00820031	0.0118421	-2.11855
Gnai3	6.0557e-14	7.65822e-13	-1.98645		Scrn1	8.54346e-28	1.07721e-26	2.21526		Eepd1	1.22781e-30	1.71944e-29	2.90034		Dnajb5	0.000389933	0.000729814	2.63808		Cops7b	0.000281083	0.000523047	2.52007
Rhoq	6.65717e-14	8.39187e-13	2.23896		Ldb2	8.58655e-28	1.08139e-26	1.5314		Pttg1	1.50435e-30	2.09499e-29	8.53355		Dock7	0.000841581	0.00150414	4.27072		Coq6	0	0	8.38202
Lgi1	8.01076e-14	1.00232e-12	-1.04815		Idh3a	8.90306e-28	1.11996e-26	-3.46148		Akap7	1.56582e-30	2.17453e-29	-4.0952		Dok6	3.21798e-15	4.68631e-14	4.48228		Coro7	3.87318e-14	4.56192e-13	4.60759
Zfp719	1.01965e-13	1.26242e-12	2.43136		Tmem181c-ps	9.20048e-28	1.15604e-26	1.64721		Taf4	1.86701e-30	2.58205e-29	8.08773		Dph5	0.0232176	0.0292006	3.18376		Cotl1	4.95239e-14	5.79142e-13	5.3532
Pcdh17	1.04532e-13	1.29149e-12	1.8548		Eif2ak1	1.05146e-27	1.3151e-26	3.76097		Hnrnpu	2.53894e-30	3.4872e-29	-1.61774		Dtwd2	0.0174573	0.0226759	2.64688		Cox10	0.0116127	0.0162187	2.3209
Coro2a	1.2104e-13	1.48921e-12	-1.95595		Fam135b	1.06327e-27	1.32835e-26	2.53466		Paics	2.63136e-30	3.60424e-29	-3.52997		Dtymk	1.09617e-31	4.12173e-30	2.29851		Cp	0.000112418	0.00022425	-4.07492
Luc7l3	1.33146e-13	1.63305e-12	-1.03658		Adgrl3	2.0757e-27	2.54372e-26	3.61888		Ai854703	3.5149e-30	4.79475e-29	1.16344		Dusp11	5.15404e-34	2.37289e-32	2.03424		Cpxm1	0	0	3.60197
Ppp1r9b	1.58987e-13	1.94191e-12	-1.17137		Cacna1c	4.22724e-27	5.12858e-26	2.38491		Nmt2	3.63632e-30	4.94688e-29	1.94495		Dusp12	0	0	7.64185		Creb3l4	0.0018856	0.00309199	2.03099
Fry	1.95585e-13	2.37175e-12	-1.00819		Pcdh7	6.1463e-27	7.383e-26	1.69638		Rnf115	3.79308e-30	5.15312e-29	1.95416		Dusp28	0.00400691	0.00622103	3.20284		Crem	2.68132e-08	1.68733e-07	-2.67685
Gnb1l	1.98997e-13	2.41065e-12	1.42213		Ccdc127	6.43472e-27	7.70402e-26	-1.82379		Zfp617	3.90594e-30	5.29925e-29	1.37066		Dvl1	0.00220159	0.00363071	2.91584		Crkl	0	0	7.83421
Psmb4	2.02888e-13	2.45023e-12	1.66108		Sesn2	7.09149e-27	8.48105e-26	2.06993		Dctn2	4.25349e-30	5.76297e-29	-1.2245		Ears2	0	0	2.61833		Crlf3	0	0	2.47983
Rogdi	2.20162e-13	2.65071e-12	-1.95135		Dtd1	7.97162e-27	9.52321e-26	2.9637		Bcl6	4.72827e-30	6.39755e-29	-1.96889		Edc3	0.0104822	0.0144568	3.16303		Crocc	7.53697e-19	1.17959e-17	2.0434
Bhlhe40	2.41156e-13	2.8858e-12	-3.04958		Cox5a	8.0073e-27	9.55538e-26	-1.20103		Ptpre	4.77475e-30	6.45173e-29	-1.51883		Edem1	0.000950003	0.00168502	3.5214		Crot	0.0163189	0.0220052	3.46886
Arl6ip6	2.82324e-13	3.35801e-12	1.5826		Usp24	8.51534e-27	1.01395e-25	1.43894		Agpat5	4.82304e-30	6.50817e-29	3.41		Eefsec	0.00125042	0.00216949	4.19808		Cry1	0.0245154	0.0318795	3.07167
Meg3	2.90272e-13	3.43867e-12	1.119		Elac2	1.03637e-26	1.23135e-25	2.04391		Tmsb10	4.98461e-30	6.70808e-29	1.06785		Clxn	0.00161085	0.00273837	2.84614		Cryab	4.14369e-23	7.98932e-22	-3.14135
Tcf7l2	3.12257e-13	3.68801e-12	-1.57848		Ppp2r2c	1.19513e-26	1.41536e-25	-1.77041		Nme2	5.45208e-30	7.32733e-29	-1.05953		Efna1	0.0335419	0.0405709	2.5046		Crybg3	0.00126635	0.00214373	-2.39948
Pald1	3.25852e-13	3.84473e-12	1.17622		Zfp259	1.26391e-26	1.4952e-25	2.42647		Eef1a1	6.73333e-30	9.00088e-29	-1.51452		Egfl7	6.52848e-08	4.14013e-07	2.06413		Csad	6.29112e-35	3.16543e-33	6.02532
Camk2n1	3.64306e-13	4.28986e-12	-1.23221		Dpysl2	1.39179e-26	1.64291e-25	-1.75197		Akap17b	7.75776e-30	1.02878e-28	2.84183		Ehd4	0	0	6.22483		Csf1	0	0	6.70255
Neurod2	5.4231e-13	6.2794e-12	-1.82966		Dmxl1	1.41513e-26	1.66686e-25	1.82855		Senp8	8.09967e-30	1.07128e-28	-5.77474		Ago4	0.00109706	0.00192224	4.53422		Csgalnact1	0.0368774	0.0462763	3.65746
Slc22a17	5.99958e-13	6.91975e-12	-1.0897		Cox6c	1.4965e-26	1.75891e-25	-1.25002		Crmp1	1.00176e-29	1.32144e-28	-2.39973		Eif4ebp3	0	0	6.28269		Csgalnact2	0	0	5.64426
Mocos	6.47208e-13	7.42841e-12	2.53493		Tysnd1	1.54878e-26	1.8184e-25	2.40418		Ppil3	1.0914e-29	1.43591e-28	6.55496		Elavl2	4.13083e-07	2.11404e-06	-4.11509		Csk	0.0139072	0.0190409	2.73098
Bcl11b	6.7639e-13	7.7558e-12	-1.45852		Zfp706	1.71289e-26	2.00461e-25	-1.74795		Eif5a	1.13194e-29	1.48729e-28	-1.5749		Elk3	0.0184638	0.0238156	2.62471		Csmd1	6.7379e-05	0.000143595	4.98633
Tnik	1.02799e-12	1.1618e-11	-1.46946		Ptchd4	1.75641e-26	2.05115e-25	1.49981		Gak	1.28318e-29	1.67938e-28	-1.29267		Elk4	2.47673e-09	2.12061e-08	2.07174		Mia2	0.0257287	0.0333364	3.65106
Miat	1.14772e-12	1.29218e-11	-2.05919		Nup210	2.02084e-26	2.35491e-25	1.40905		Ccnk	1.54399e-29	2.01545e-28	2.94586		Elovl1	4.38267e-06	1.6142e-05	5.73297		Ctdnep1	0.0108999	0.0153184	2.15186
Rbfox3	1.20411e-12	1.35357e-11	-1.74355		Pnma8b	2.64238e-26	3.05313e-25	-1.81436		Prr12	1.64146e-29	2.13632e-28	-1.46458		Eml3	2.69609e-14	3.73113e-13	7.93953		Ctdsp1	6.90959e-16	9.01784e-15	5.26439
Tiam2	1.36014e-12	1.51542e-11	-4.21808		Atp5mk	2.93684e-26	3.38978e-25	-1.62488		Scamp4	2.04008e-29	2.63536e-28	-7.78961		Emx1	0.0116326	0.0158582	2.97766		Ctnnbip1	0.000510444	0.000917408	-3.43117
Kctd7	1.36396e-12	1.51824e-11	1.18718		Zzz3	3.70265e-26	4.26469e-25	1.81391		Dync2i2	2.48725e-29	3.18847e-28	2.00969		Enpp2	1.49272e-05	4.32875e-05	-3.32825		Ctnnd1	0	0	5.83258
Matk	1.52114e-12	1.68367e-11	-2.73842		Cnbp	3.76865e-26	4.33613e-25	-1.64398		Smarcal1	2.62696e-29	3.35895e-28	1.99173		Tepsin	0.00339518	0.00535078	3.63391		Ctsk	0	0	4.70425
Bag3	1.62342e-12	1.79016e-11	3.41157		Tbc1d25	4.61449e-26	5.29261e-25	2.23976		Zfp706	2.89488e-29	3.69208e-28	-2.33854		Epas1	3.1697e-05	7.95246e-05	-3.58679		Ctsz	0.000182603	0.000348498	5.32392
Nsg2	2.07208e-12	2.26375e-11	-2.0776		Zfp467	4.80668e-26	5.49572e-25	1.82766		Gskip	2.89977e-29	3.6936e-28	-4.12494		Ephb1	0.000262676	0.000502246	-3.26087		Ctu1	0	0	2.97206
Rtn1	2.10995e-12	2.30299e-11	-1.93326		Brd9	5.69993e-26	6.47633e-25	-1.38513		Ftl	2.91668e-29	3.71041e-28	-1.24355		Eprs1	1.21472e-06	5.43626e-06	2.76206		Cul2	0.00910801	0.0130218	2.36241
Grm2	2.28994e-12	2.49253e-11	-1.99883		Gltp	6.06253e-26	6.87402e-25	1.8984		Gpd1	3.14513e-29	3.98583e-28	-2.13645		Eps8l2	0	0	5.9264		Cul4a	3.53153e-19	5.65835e-18	2.66313
Hspa8	3.02648e-12	3.24926e-11	1.10815		Ccdc97	6.12296e-26	6.93533e-25	1.51185		Cox15	4.0399e-29	5.10038e-28	-8.44283		Ercc5	0.037443	0.0447525	3.11117		Cul4b	1.23132e-07	6.64428e-07	3.49689
Mycbp	3.13332e-12	3.35482e-11	-4.0279		Exoc1	6.21312e-26	7.03016e-25	2.37809		Kif5c	7.26932e-29	9.04053e-28	-2.2206		Ercc6l2	4.10316e-09	3.38488e-08	5.60431		Cul9	0.00527008	0.00793105	3.31359
Psmc4	3.14739e-12	3.36682e-11	2.23377		Gnai2	6.64025e-26	7.49792e-25	3.75218		Parp1	8.38993e-29	1.03954e-27	-1.90974		Erdr1	0.00156774	0.00267072	2.33764		Cutc	2.17572e-06	8.27855e-06	7.86637
Gch1	3.27685e-12	3.50214e-11	4.57598		Prrc2c	9.19486e-26	1.02552e-24	1.43405		Rbx1	8.41697e-29	1.0416e-27	-2.02006		Erlin1	0.00544116	0.00814607	3.88777		Cxxc1	3.33305e-09	2.4975e-08	2.26258
Jmjd6	3.6841e-12	3.90203e-11	1.13865		Anks1b	1.0789e-25	1.20209e-24	-1.10979		Camk2n2	1.03116e-28	1.26665e-27	1.21821		Esco1	0.00322134	0.0051127	3.43548		Cyb561d2	6.53491e-11	5.94517e-10	5.76342
Nr3c2	4.16481e-12	4.39934e-11	-1.30808		Zfp113	1.52159e-25	1.67652e-24	1.90648		Rmrp	1.07251e-28	1.31583e-27	-1.56361		Ethe1	0	0	4.2637		Cyp11a1	0	0	3.03255
Luc7l	4.26006e-12	4.49593e-11	1.19514		Ngly1	1.86257e-25	2.0476e-24	2.22936		Itsn1	1.12935e-28	1.38218e-27	-3.24838		Evi5l	0.000762687	0.00136981	2.69296		Cyp4f13	0	0	5.51512
Adgrb1	4.28859e-12	4.51795e-11	1.30206		Nf1	1.86589e-25	2.0476e-24	5.50966		Ap2a1	1.43061e-28	1.74447e-27	-2.59275		Exoc7	0.000702892	0.00126885	2.1746		Cyth3	1.77761e-08	1.16132e-07	2.45289
Gpr12	4.35975e-12	4.58882e-11	-3.80773		Lsm14a	1.95602e-25	2.14435e-24	4.39068		Grk4	1.69227e-28	2.05851e-27	1.87135		Exog	0.0385855	0.0460099	2.65135		Cyth4	0	0	5.87598
Tstd2	4.42597e-12	4.65437e-11	1.34215		Chd6	3.76193e-25	4.09128e-24	1.0679		Hid1	1.76625e-28	2.1459e-27	-3.97504		Exosc1	0.00602471	0.00888159	3.66589		D17wsu104e	0.0101464	0.0143632	2.42328
Cyfip1	4.45895e-12	4.68488e-11	-1.39073		Ywhah	4.07451e-25	4.42682e-24	-2.58093		Olfr856-ps1	2.29345e-28	2.75297e-27	4.36667		Exosc8	0.00527404	0.00792835	3.11309		Dact1	0	0	3.00104
Nav1	4.77333e-12	4.99296e-11	-2.02099		Uqcrq	4.2789e-25	4.63965e-24	-1.01567		Trpm7	2.64045e-28	3.15812e-27	4.09066		Ezh2	0.00639817	0.00937127	2.078		Dact2	0	0	4.61194
Calb2	4.87876e-12	5.0942e-11	1.63063		Prpf3	5.2485e-25	5.6741e-24	5.69464		Trnau1ap	2.79862e-28	3.3433e-27	-7.90895		Fam107a	3.09996e-05	7.79925e-05	-2.14683		Dbr1	7.68647e-11	6.94871e-10	5.12787
Asphd2	5.03082e-12	5.24833e-11	-1.27238		Cdc42se1	8.69598e-25	9.26355e-24	1.77162		Abca5	3.29108e-28	3.90826e-27	1.90897		Retreg3	0.00171896	0.00290863	4.07062		Dbx2	0.000335722	0.000618004	7.43491
Jph4	5.18315e-12	5.39294e-11	-2.07094		Ccdc71l	8.8603e-25	9.4294e-24	1.81496		Ahsa1	3.87994e-28	4.58035e-27	-3.45094		Fam135a	0.00275497	0.00444552	3.04934		Dcbld1	0.00369651	0.00572286	2.92029
Csf1	6.08421e-12	6.30823e-11	-3.72673		Cit	8.88337e-25	9.44474e-24	2.03889		Cdc26	5.86937e-28	6.87211e-27	-5.79435		Fam149b	0.0191664	0.0245947	3.23108		Dcdc2	1.68515e-05	4.56374e-05	-5.79268
Ltbp2	6.90765e-12	7.11349e-11	1.27396		F10	9.28814e-25	9.86549e-24	1.55112		Rps14	5.91245e-28	6.91445e-27	-1.6246		Abraxas1	0.00216312	0.00357281	4.53746		Dcn	5.86969e-12	5.90159e-11	-6.23174
Slc18a1	8.77972e-12	8.95349e-11	2.48386		Ndor1	9.70162e-25	1.02947e-23	3.02073		Arf1	5.941e-28	6.93972e-27	-2.10087		Fam185a	5.21882e-30	1.71912e-28	4.89944		Dcx	4.43537e-05	0.00010142	3.75754
Spry2	8.86874e-12	9.03647e-11	2.61701		Mbd6	1.12972e-24	1.19645e-23	3.9644		Ndufaf7	8.7172e-28	1.00767e-26	-3.53394		Psme3ip1	0.019724	0.0252328	2.0867		Ddost	0.0068442	0.0100585	2.65885
Ncdn	9.53824e-12	9.71025e-11	-1.1417		Parp2	1.36043e-24	1.43522e-23	1.7597		Slf2	1.00141e-27	1.15358e-26	3.36269		Slx9	0.0137934	0.0184364	2.64094		Ddx10	0.000797735	0.00139209	2.59732
Kcnab2	1.13689e-11	1.15044e-10	-1.23484		Linc00598	1.49789e-24	1.57871e-23	1.95672		Mrpl47	1.06179e-27	1.22032e-26	1.69257		Fam210b	0.0180348	0.0233399	2.34087		Ddx49	3.99294e-06	1.39443e-05	2.08739
Gabrb3	1.151e-11	1.16277e-10	-1.16027		Rbfox3	1.74678e-24	1.83572e-23	-1.06		Slc17a6	1.23507e-27	1.41137e-26	4.34722		Fam43b	0.00810118	0.0115298	2.10894		Ddx52	0.00431112	0.00659516	3.25982
Il1rap	1.15104e-11	1.16277e-10	-1.74766		Lamp2	1.9477e-24	2.03706e-23	-1.55663		Dnajc7	1.56979e-27	1.7857e-26	-2.08006		Ccnqp1	0.00253984	0.00413892	2.27578		Deaf1	0.00108769	0.00186238	5.28117
Ncald	1.21735e-11	1.22765e-10	-1.98603		Ppm1b	2.33323e-24	2.43562e-23	-2.30099		Exog	1.63786e-27	1.86102e-26	2.5717		Garin5a	0	0	4.79331		Def8	8.06939e-05	0.000167673	2.24259
Psmd4	1.26824e-11	1.27461e-10	1.47606		Stard3nl	2.79452e-24	2.90604e-23	-6.17894		Sqle	1.7216e-27	1.94952e-26	7.15684		Fam76b	0.00518939	0.00781818	3.34328		Dennd4c	0.0118733	0.0165325	3.44987
Scn3b	1.27919e-11	1.28452e-10	-2.43734		Fth1	2.95778e-24	3.06952e-23	-1.22754		Dgki	1.9081e-27	2.15339e-26	-1.32331		Far2	0	0	8.74366		Dennd6b	0.000276843	0.00051524	2.68602
Ahcyl2	1.41715e-11	1.41823e-10	-2.04921		Dusp11	2.96016e-24	3.06952e-23	1.88568		Wdsub1	2.51535e-27	2.82278e-26	5.48872		Fastk	0.00112068	0.00195833	2.14387		Dexi	1.17754e-13	1.34149e-12	2.38555
Sh3glb2	1.42561e-11	1.42549e-10	-1.52295		Unc119b	3.07826e-24	3.18895e-23	2.28729		Gdi2	3.60318e-27	4.00758e-26	-2.13173		Fastkd2	6.25091e-10	5.94777e-09	2.29699		Gsdme	0	0	4.75277
Alg1	1.48685e-11	1.48045e-10	-1.98984		Unc13b	3.62313e-24	3.73922e-23	3.82124		Kctd12	4.12266e-27	4.56001e-26	2.83266		Fbl	0.00152854	0.00260908	2.1039		Dgat1	0.0155187	0.0210338	2.61623
Lrfn3	1.54383e-11	1.53201e-10	-1.64591		Plxna3	5.05073e-24	5.18805e-23	1.91561		Thy1	4.93356e-27	5.45091e-26	-1.155		Fbln1	5.78233e-10	5.53344e-09	2.47258		Dgat2l6	0	0	4.13708
Ptk2b	1.55726e-11	1.54404e-10	-1.55597		Itgav	5.6546e-24	5.80287e-23	-1.27063		Dpysl2	4.9732e-27	5.48864e-26	-2.91357		Fbn1	1.43147e-09	1.28371e-08	7.80495		Ess2	0	0	3.6552
Etnk1	1.75155e-11	1.72221e-10	1.55201		Stmn3	6.49368e-24	6.63279e-23	-1.23646		Mff	7.98138e-27	8.75064e-26	-3.32354		Fbrs	0.00947997	0.0132527	3.30565		Dgka	5.26074e-06	1.75942e-05	3.08448
Lars2	1.85062e-11	1.81057e-10	2.20861		Atg3	6.93203e-24	7.0673e-23	-1.05446		Setbp1	1.16493e-26	1.26335e-25	-6.50761		Fbxl12	0	0	5.83698		Dhcr7	0.0123951	0.017188	2.54586
Adcy1	1.92137e-11	1.87668e-10	-1.68841		Hipk4	7.05897e-24	7.19001e-23	1.23427		Hspa14	1.28001e-26	1.38516e-25	-3.31724		Fbxl2	4.68946e-05	0.000108498	4.71132		Dhx16	0.0149133	0.0202817	3.70716
Ccdc85a	1.946e-11	1.8976e-10	-2.16166		Hbegf	7.82401e-24	7.95441e-23	2.82049		Gtf2h5	1.39594e-26	1.5041e-25	-2.68201		Fbxl7	0	0	5.84333		Dhx33	1.39686e-31	5.16929e-30	2.30988
Fa2h	1.96617e-11	1.91409e-10	-2.18794		Etfrf1	1.1337e-23	1.14514e-22	2.989		Pitpnb	1.52907e-26	1.64047e-25	-6.57338		Fbh1	4.59138e-05	0.000106721	4.41023		Dicer1	0.0105551	0.0148939	2.08712
Pcdh8	2.07728e-11	2.0123e-10	2.2592		Ipo8	1.41377e-23	1.42145e-22	-1.76413		Hps5	1.58822e-26	1.70028e-25	4.01195		Fbxo42	0.00257177	0.00418279	3.67984		Dido1	0.00302544	0.00477215	2.41658
Cdk5r1	2.08948e-11	2.02246e-10	-1.97126		Rnf146	1.56187e-23	1.56747e-22	1.40912		Arhgap44	1.74768e-26	1.865e-25	-2.69973		Fcho1	0.00103403	0.00182073	2.42594		Dll3	0.0177103	0.0236797	4.76533
Snapc5	2.18782e-11	2.10795e-10	-3.31441		Usp45	1.63443e-23	1.63878e-22	1.54849		Nsa2	1.79898e-26	1.91565e-25	-1.21506		Fcrls	0.0024562	0.00401774	3.20446		Dnah1	3.16277e-07	1.53223e-06	2.69271
Tub	2.18852e-11	2.10795e-10	-2.32219		Ehmt1	1.64077e-23	1.64363e-22	2.1897		Ppp3r1	1.87046e-26	1.98754e-25	-2.15909		Fermt2	0.00509372	0.00768792	2.09046		Dnajb12	0.0120868	0.016795	4.75079
Wasf1	2.37109e-11	2.27822e-10	-1.54946		Meg3	2.18696e-23	2.18077e-22	2.10505		Cox6b1	2.10875e-26	2.23599e-25	-2.06884		Fez2	0.00913137	0.0128144	2.15094		Dnajc12	7.65862e-19	1.19537e-17	5.84927
Ephb1	2.44143e-11	2.34008e-10	1.99577		Elob	2.27398e-23	2.25929e-22	-1.82696		Gabrb3	2.32557e-26	2.45548e-25	-1.93652		Ffar2	7.78985e-05	0.000165446	-2.59363		Dnajc17	6.53528e-08	3.78268e-07	2.2853
Dgkh	2.55716e-11	2.43913e-10	-1.60467		Mapk1	2.68903e-23	2.66923e-22	-1.74642		Bc027231	2.49297e-26	2.62945e-25	-8.07016		Fggy	0	0	4.09418		Dnajc2	0.00221213	0.00358389	2.23036
Plcb1	2.56739e-11	2.4469e-10	-1.01001		Hdac7	2.7227e-23	2.7002e-22	1.38184		Cdh11	2.70031e-26	2.83915e-25	2.4968		Filip1	0.010474	0.0144488	3.79506		Dnajc28	7.33219e-31	2.50342e-29	-3.78017
Eprs1	2.5964e-11	2.47056e-10	1.7259		Hsbp1	3.72069e-23	3.67325e-22	-1.08006		Mcc	3.1151e-26	3.27183e-25	3.41143		Fitm2	0.0278367	0.0343206	2.76492		Dnm2	0.00801963	0.0116046	3.90182
Zcchc18	2.77494e-11	2.63418e-10	-1.29361		Tmsb4x	3.79892e-23	3.7471e-22	-1.75603		Rps16	3.13955e-26	3.29406e-25	-1.9401		Fiz1	0.0111145	0.0152268	3.04741		Dock4	0.000583339	0.00103817	3.64236
Anxa5	2.9046e-11	2.75493e-10	1.75387		Nrsn1	3.87807e-23	3.81827e-22	-2.96612		Rerg	3.85591e-26	4.02456e-25	3.61906		Fkbp14	0.0165383	0.0216354	3.44809		Dok6	0	0	3.82737
Pcdhb5	3.00524e-11	2.84353e-10	-3.16886		Syt4	4.17686e-23	4.10136e-22	1.03321		Pnma8b	4.98636e-26	5.1882e-25	-1.65614		Fkbp7	0	0	5.98322		Dolpp1	0.0128043	0.0176913	2.57679
Klf13	3.03266e-11	2.86718e-10	-1.36239		Ddn	4.39072e-23	4.30361e-22	-1.7457		Acp2	5.20806e-26	5.39801e-25	2.0277		Flna	0.0209312	0.0266169	2.99581		Dpp10	0.00375731	0.00580937	-3.08217
Snhg4	3.16059e-11	2.97858e-10	-2.71053		Tfe3	4.88387e-23	4.78269e-22	2.50256		Eif3m	6.73318e-26	6.94073e-25	2.13449		Flnb	0.000152151	0.000301619	2.63737		Dpp8	0.0168703	0.022665	2.16274
Trim46	3.36531e-11	3.16392e-10	-1.1682		Ssh3	5.65843e-23	5.52139e-22	1.15036		Anapc11	8.83866e-26	9.0551e-25	4.14992		Fmnl3	2.25399e-14	3.12301e-13	4.22865		Drd5	0	0	2.54001
Ncbp1	3.43832e-11	3.23e-10	1.86611		Hexd	5.6968e-23	5.55387e-22	6.52973		Snap25	9.2055e-26	9.41163e-25	-2.31906		Fndc9	0	0	4.47037		Dpysl2	0.000486359	0.000877006	3.79132
Gm15645	3.49305e-11	3.2762e-10	1.00917		Chn1	6.0181e-23	5.85144e-22	-2.07062		Luc7l2	1.10619e-25	1.12292e-24	1.29531		Fos	0.0394937	0.0469635	3.81443		Dtnbp1	0.0366144	0.0459613	3.48428
Tpt1	3.55e-11	3.32432e-10	1.29854		Arpc1a	7.59193e-23	7.34245e-22	-2.23854		Fkbp8	1.2536e-25	1.2687e-24	-2.67544		Foxred2	0	0	3.63476		Dtwd2	0.00031944	0.00058983	-3.55184
Zfp783	3.59082e-11	3.35722e-10	1.62428		Ncor1	8.70123e-23	8.35609e-22	-1.52465		Ralgapb	1.32173e-25	1.33629e-24	3.0325		Fpgt	0.0120363	0.016338	2.28736		Dusp4	0	0	3.45437
Hadh	3.70488e-11	3.46111e-10	3.03361		Pex16	8.94614e-23	8.58373e-22	1.23375		Sgpp2	1.43333e-25	1.44766e-24	2.42543		Frmd6	5.0842e-11	5.40989e-10	7.554		Dusp6	0	0	3.77878
Itm2c	3.73397e-11	3.48277e-10	-2.0696		Pard3	9.99872e-23	9.56007e-22	2.16997		Sephs2	1.64061e-25	1.64703e-24	-2.32098		Frrs1	1.1141e-07	6.59325e-07	5.00873		Dvl2	0	0	4.07424
Gstm6	3.78977e-11	3.53203e-10	-4.92306		Nbeal1	1.00932e-22	9.64196e-22	1.04671		Slc27a4	1.8132e-25	1.81665e-24	3.87371		Fuz	0.0223306	0.0282155	3.43303		E2f5	1.91686e-24	4.03491e-23	5.57099
Trim9	3.9004e-11	3.62368e-10	1.52627		Tspan4	1.08664e-22	1.03625e-21	7.92709		Vps26b	1.8765e-25	1.87819e-24	1.93179		Fxyd7	4.39817e-09	3.60928e-08	-4.42109		E2f6	1.804e-05	4.82636e-05	2.94773
Celf5	4.08595e-11	3.78712e-10	-1.59709		Ppp2r1a	1.11936e-22	1.06652e-21	-1.42706		Necab2	2.25694e-25	2.24997e-24	-6.79514		Pigu	0.00139606	0.00240328	-4.36641		Dmap1	0.0221604	0.0290708	3.70843
Cadm2	4.18572e-11	3.87656e-10	-1.50525		Zfp36l2	1.52841e-22	1.44366e-21	1.15183		Fam107b	2.43962e-25	2.42724e-24	3.45253		Gabpb1	0.0184185	0.0237628	2.36597		Edem2	0.000169661	0.000325042	3.79346
Htatip2	4.28007e-11	3.95153e-10	1.75111		Jpx	1.72714e-22	1.62434e-21	2.10107		Sipa1l3	2.82143e-25	2.79876e-24	-1.68981		Gabra3	0.000459806	0.000854165	-2.43374		Eea1	3.91152e-05	9.13723e-05	2.21017
Dnm1	5.33924e-11	4.87598e-10	-1.45652		Tm2d1	1.77839e-22	1.6711e-21	-2.55666		Racgap1	2.9093e-25	2.8802e-24	2.09693		Gabrg1	0.000636464	0.00115859	-2.62102		Eefsec	3.64232e-28	9.99896e-27	2.61453
Adra2c	5.40247e-11	4.9261e-10	1.08324		Pex1	1.80197e-22	1.69181e-21	2.23124		Nr2f1	2.96552e-25	2.93007e-24	1.56459		Gad1	5.32535e-05	0.000120361	-2.07811		Efcab14	2.10292e-10	1.81389e-09	3.30186
Elmod1	5.59912e-11	5.10147e-10	-1.15924		Selenow	1.82715e-22	1.7125e-21	-1.50108		Csnk2a2	3.03847e-25	2.99918e-24	-3.24841		Gale	4.90421e-19	8.68937e-18	2.54153		Efcab2	0	0	7.04638
Btg1	5.99178e-11	5.44241e-10	-1.74276		Sntg1	1.96071e-22	1.8314e-21	1.31608		Plp1	3.12692e-25	3.08344e-24	2.18939		Gap43	5.53781e-06	1.96299e-05	-2.34907		Efcab5	9.6962e-08	5.36588e-07	2.31942
Scg2	6.37966e-11	5.78139e-10	2.68118		Dll3	1.9795e-22	1.84737e-21	1.6869		Ifnar1	3.13678e-25	3.09011e-24	1.99269		Gapdhs	0	0	4.46138		Egfl7	0	0	3.17542
Lnx1	6.46026e-11	5.84993e-10	-1.11214		Tmem119	2.0506e-22	1.91208e-21	2.14979		Lpgat1	3.38168e-25	3.31829e-24	4.18359		Gas8	0.00312813	0.00498098	2.18291		Ehd4	8.61172e-22	1.57315e-20	6.79372
Plvap	6.75864e-11	6.09207e-10	-2.34455		Slfn5	2.07249e-22	1.93084e-21	1.31876		Trip4	3.46078e-25	3.39259e-24	2.70415		Gdf11	0.00553861	0.00826024	-3.33415		Ei24	0.00071333	0.00125415	4.33095
Ctxn1	6.87714e-11	6.19013e-10	-1.16688		Bin1	2.15916e-22	2.00817e-21	1.0629		Ube3c	4.16208e-25	4.06412e-24	-2.06015		Gdpd5	2.3263e-05	6.18938e-05	2.49878		Eif2ak4	0.000131758	0.000258116	3.72897
Psmb6	7.91599e-11	7.07581e-10	1.27329		Pxmp2	2.21256e-22	2.05608e-21	2.19382		Zfp800	4.5444e-25	4.4288e-24	5.32645		Gemin4	0	0	8.51068		Ago4	2.32744e-10	1.9896e-09	2.35731
Nptx1	8.66032e-11	7.67717e-10	-1.7174		C12orf57	2.57323e-22	2.38111e-21	-2.75121		Med21	5.05709e-25	4.90931e-24	4.06119		Gfpt1	0.0268867	0.0332642	2.29913		Eif4ebp3	7.02749e-06	2.24692e-05	2.20363
Nol3	1.01962e-10	8.97133e-10	5.08598		Pdhb	2.65072e-22	2.45074e-21	-2.37575		Ddx17	5.34448e-25	5.18327e-24	1.26606		Ggcx	0.0252505	0.0314629	2.56483		Elac2	0	0	6.5013
Src	1.06554e-10	9.35436e-10	-2.53807		Loc106740	3.15632e-22	2.90834e-21	1.93912		Shroom2	5.43434e-25	5.26531e-24	-7.90366		Gins4	0	0	4.95958		Elk4	5.80482e-06	1.90948e-05	7.25828
Tmem191c	1.0668e-10	9.35845e-10	-2.91767		Ddx25	3.7478e-22	3.44174e-21	1.56311		Ctss	5.94764e-25	5.75707e-24	4.04765		Glb1	0.0212583	0.0269771	2.17675		Ell3	0	0	3.61455
Ubr4	1.1727e-10	1.02256e-09	1.65639		Kcnn1	5.04512e-22	4.60599e-21	1.81734		Togaram1	6.1474e-25	5.93892e-24	-2.96316		Gm10516	0	0	2.62901		Mideas	0.0219913	0.0288853	2.17897
Synpo	1.17344e-10	1.02256e-09	1.27176		Jpt1	5.11844e-22	4.66902e-21	-2.65907		Erbin	7.06006e-25	6.80748e-24	1.32343		Gm12216	0.00657152	0.00960593	3.55005		Elovl1	0	0	4.73532
Slc25a23	1.21589e-10	1.05877e-09	-1.18725		Khsrp	5.33987e-22	4.86695e-21	2.44791		Cdr1	7.84666e-25	7.55137e-24	1.46952		Gm13315	0.0345955	0.0417201	3.50643		Elovl2	0.00376075	0.00581289	3.53716
Adcyap1r1	1.23613e-10	1.07401e-09	-1.92478		Mbd1	5.39207e-22	4.91043e-21	2.1609		Snph	7.90367e-25	7.59892e-24	-2.01245		Gm13375	0.000567266	0.0010391	-3.41648		Eml1	0	0	5.94262
Oplah	1.25994e-10	1.09362e-09	-1.90258		Ptbp2	7.33977e-22	6.63435e-21	-2.26908		Nenf	8.00368e-25	7.68769e-24	-1.51727		Gm13399	0.0343021	0.0414005	2.42819		Eml6	0.0145192	0.0197961	2.70118
Dapk1	1.3531e-10	1.17048e-09	-1.56707		Pnkp	8.97145e-22	8.07578e-21	3.26369		Mfsd11	8.40576e-25	8.06614e-24	1.45841		Gm14378	0	0	5.10352		Emp2	0.0223585	0.0293106	3.19146
Psmc5	1.5044e-10	1.2947e-09	1.59552		Tmem129	9.90764e-22	8.90383e-21	1.21852		Car5b	9.14471e-25	8.75005e-24	1.37569		Gm16023	0	0	5.29146		Engase	0	0	2.55062
Nrxn1	1.72602e-10	1.47361e-09	-1.37654		Kctd9	1.04779e-21	9.40088e-21	2.36227		Dnajb9	9.33327e-25	8.92193e-24	3.03011		Gm16515	9.17697e-09	7.0417e-08	5.09449		Enox2	0.0322727	0.0409957	3.95394
Trpm3	1.75912e-10	1.49537e-09	-1.36769		Gtdc1	1.30408e-21	1.16239e-20	-4.36364		Cacnb4	9.80032e-25	9.35051e-24	-1.05988		Gm16894	0	0	4.24553		Ep400	0.00133225	0.00224758	2.2945
Zfp580	1.85242e-10	1.57243e-09	-1.16851		Kcnq1ot1	1.40413e-21	1.24851e-20	1.80412		Matk	1.02791e-24	9.77931e-24	-1.28674		Gm1943	6.49673e-13	8.12543e-12	2.03201		Epas1	3.412e-05	8.16489e-05	-3.1964
Igsf8	2.00681e-10	1.69738e-09	-1.40672		Ctss	1.46477e-21	1.30031e-20	2.60302		Poldip3	1.02904e-24	9.78082e-24	4.33538		Gm20199	0	0	3.3585		Ephb3	0.000108121	0.000216241	-2.95362
Uchl1	2.02659e-10	1.71264e-09	1.4345		Cops7a	1.76044e-21	1.55394e-20	-2.6963		Pnck	1.31348e-24	1.2437e-23	-2.14053		Gm20362	0.011864	0.0161341	3.02429		Ephb6	3.09392e-09	2.32897e-08	4.16854
Psmd12	2.35745e-10	1.96994e-09	2.15484		Rps3a1	1.78398e-21	1.57345e-20	-1.24088		Grb14	1.3182e-24	1.24699e-23	1.27501		Gm20752	0	0	4.12056		Eps8	0.000583031	0.00103795	2.58709
Nt5dc3	2.43083e-10	2.02552e-09	1.04229		Brinp2	1.92706e-21	1.69298e-20	2.68973		Mrps5	1.545e-24	1.45878e-23	2.818		Gm3435	0.0108955	0.0149562	4.09857		Ercc4	0.0108735	0.0152869	2.15711
Smoc2	2.74078e-10	2.25985e-09	1.04873		Adcyap1r1	2.14919e-21	1.88338e-20	-2.91566		Aph1a	1.85376e-24	1.74701e-23	2.00003		Gm4791	0.00867976	0.0122542	2.00317		Ercc5	3.37116e-06	1.211e-05	2.34883
Brd9	2.93148e-10	2.40365e-09	-2.24937		Psmb11	2.2806e-21	1.99694e-20	1.57933		Rprm	1.89059e-24	1.78004e-23	-1.35939		Gm4922	0.00905458	0.0127158	4.13453		Ercc6l2	9.06272e-06	2.76583e-05	5.4733
Rsad1	3.07158e-10	2.51154e-09	-2.66869		Rn45s	2.60419e-21	2.27117e-20	1.07798		Hs6st1	1.94261e-24	1.8273e-23	2.85521		Gm5431	0.0345556	0.0416762	3.70849		Erdr1	1.22183e-17	1.79244e-16	2.22005
Rfx3	3.07945e-10	2.51624e-09	-1.28588		Mtch1	2.63505e-21	2.29626e-20	-1.34493		Rpl32	2.31602e-24	2.17037e-23	-1.06226		Gm5577	0.000414713	0.000774087	4.37827		Eri2	5.35078e-07	2.45046e-06	-2.53205
Arhgap20	3.1244e-10	2.54943e-09	-1.19121		Snhg10	2.68414e-21	2.33717e-20	3.06083		Crlf1	2.50046e-24	2.33664e-23	-3.61915		Gm608	0.0163002	0.0213574	2.50835		Eri3	0.00204391	0.00333017	2.00163
Acap2	3.1903e-10	2.6014e-09	1.36578		Zc3h18	2.7366e-21	2.38095e-20	5.03832		Ppp2r2c	2.57573e-24	2.40474e-23	-1.4224		Gm6225	0	0	4.33009		Erlin1	6.74955e-12	6.75662e-11	2.29706
Srsf9	3.32048e-10	2.69452e-09	-1.281		Wasf1	3.05975e-21	2.65365e-20	-1.94133		Blvra	3.61404e-24	3.35531e-23	1.32957		Gm6402	0.0171518	0.0223131	3.31876		Erp44	0.0190243	0.0252689	2.31222
Eif3c	3.54249e-10	2.86287e-09	1.45509		Stxbp5l	3.23809e-21	2.80609e-20	1.33259		Glrx5	3.84092e-24	3.55935e-23	2.06519		Gm6981	0.0194631	0.0249289	2.63606		Esyt2	0.00945371	0.0134758	2.60626
Cnksr3	3.59374e-10	2.90031e-09	-1.43253		Traf3	3.97094e-21	3.43571e-20	2.78215		Chd3	4.90206e-24	4.50927e-23	-1.14126		Gm6994	4.15538e-09	3.42445e-08	3.28781		Ethe1	4.83715e-27	1.23315e-25	5.74041
Prrt2	3.68681e-10	2.9673e-09	-2.0194		Cbln3	4.2053e-21	3.6356e-20	1.94066		Ai593442	6.58014e-24	6.01965e-23	-2.41569		Gm9866	0.0389216	0.0463728	2.22843		Exoc8	1.25855e-15	1.61681e-14	2.51551
Sobp	3.82747e-10	3.07004e-09	-1.48686		Tm9sf3	4.76386e-21	4.10549e-20	2.97467		Nacc1	7.44614e-24	6.79324e-23	1.76523		Gmip	0.0261478	0.0324702	5.69281		Ext1	0	0	3.30996
Camta2	3.92604e-10	3.14697e-09	-1.06574		Faf1	5.47823e-21	4.70258e-20	1.74622		Cox17	9.15925e-24	8.31064e-23	-1.35493		Gnb1l	3.70975e-11	4.01312e-10	2.59157		Extl3	0.00319463	0.00501764	2.02159
Pinx1	4.06194e-10	3.24268e-09	2.39623		Fbf1	5.54709e-21	4.75421e-20	2.88648		Dusp28	9.66357e-24	8.75236e-23	1.56623		Gpaa1	2.42926e-21	4.87269e-20	3.67867		Eya3	0.0112303	0.0157364	3.11252
Calb1	4.20048e-10	3.33747e-09	-2.19532		Gm17821	6.98894e-21	5.97122e-20	1.85972		Zmat5	1.13648e-23	1.02839e-22	-2.64875		Gpatch1	0.00188016	0.00315536	2.39303		F8a1	0.00716749	0.0104773	2.53531
Klhl5	4.22948e-10	3.35599e-09	-2.05718		Ndufa3	7.39377e-21	6.30723e-20	-1.31584		Dgcr6	1.37104e-23	1.23616e-22	-1.97336		Gpc3	0.0344557	0.04156	3.49766		Fads3	0.000800654	0.00139655	5.44878
Rph3a	4.30352e-10	3.41245e-09	-1.55305		Fam184a	8.39946e-21	7.13726e-20	2.58703		C5ar2	1.47695e-23	1.32347e-22	6.36753		Gpn2	0	0	5.50609		Pheta1	0	0	2.68105
R3hdm1	4.33207e-10	3.43278e-09	1.73258		Rps21	1.06314e-20	8.95712e-20	-1.19559		Dclk1	1.71155e-23	1.52938e-22	-1.9338		Gpnmb	9.5511e-22	1.95948e-20	2.01947		Fam131b	8.07599e-05	0.000167735	-2.00883
Kcnq2	4.36796e-10	3.45657e-09	-1.16816		Thbs3	1.06892e-20	8.99889e-20	2.54801		Rab5b	1.74614e-23	1.55751e-22	-2.21241		Gpr107	0	0	9.74731		Fam135a	2.62467e-10	2.22873e-09	6.07218
Bola1	4.37458e-10	3.4595e-09	-1.69953		Taf1b	1.07083e-20	9.008e-20	1.94776		Ahcyl1	2.05719e-23	1.82681e-22	-1.50491		Adgrf5	6.35852e-13	7.96109e-12	-3.92147		Fam135b	0.00118957	0.00202473	2.38984
Ptgs1	4.48536e-10	3.54235e-09	3.04113		Gpx3	1.07607e-20	9.04515e-20	1.56928		Golt1a	2.31264e-23	2.04819e-22	-3.1811		Gpr135	0.00367718	0.00575263	2.81982		Fam13a	0	0	5.86504
Zfand5	4.65576e-10	3.66956e-09	1.34228		Akap12	1.27333e-20	1.06622e-19	2.26475		Mkln1	2.54977e-23	2.25421e-22	2.55523		Gpr171	0.00213172	0.00352943	3.40294		Fam185a	0	0	5.49733
Slc29a4	4.81688e-10	3.78896e-09	-4.61265		Fam131a	1.29808e-20	1.08528e-19	-1.48448		Tmem50a	2.66384e-23	2.35298e-22	-1.28155		Gpr3	0	0	5.97321		Entrep2	0.0118906	0.0165545	2.12148
Ptprz1	4.84277e-10	3.80679e-09	2.72822		Apba3	1.34204e-20	1.12118e-19	2.64735		Nhp2	2.90438e-23	2.55867e-22	-2.72235		Gpr35	0.000204752	0.000396944	-2.40155		Entrep3	1.37486e-13	1.55854e-12	2.56283
Eif2s2	5.09427e-10	3.9859e-09	1.58852		Cand2	1.4761e-20	1.22941e-19	1.31249		Zfp113	3.07933e-23	2.70803e-22	1.67082		Gpr45	1.77494e-18	3.05686e-17	5.94467		Fam210b	0.00769175	0.0111682	4.52189
Epha7	5.33635e-10	4.16151e-09	1.7168		Dnajc14	1.58954e-20	1.32288e-19	2.03419		Olfm1	3.216e-23	2.82077e-22	-1.71005		Gpsm1	0.00113323	0.0019788	2.94911		Fam219b	9.08332e-05	0.000185383	3.21974
Pdcd6	5.66074e-10	4.39994e-09	1.70979		Amph	1.71549e-20	1.42444e-19	1.25767		Tma7	3.45011e-23	3.02346e-22	1.02532		Dpagt1	5.37551e-06	1.91475e-05	-2.96766		Fam220a	0.0131756	0.0181475	2.81852
Llph	5.69093e-10	4.41758e-09	1.52892		Thoc5	1.85292e-20	1.53389e-19	3.73928		Zfp182	3.45979e-23	3.02928e-22	1.69991		Gpx3	1.44547e-24	3.42867e-23	-3.60033		Fam50a	0.00430053	0.00657985	2.74368
Dlgap4	5.70184e-10	4.42314e-09	1.04104		Ercc2	1.88853e-20	1.561e-19	2.41207		Rnf149	4.06199e-23	3.54414e-22	2.43386		Grb10	0.015078	0.0199482	4.34414		Tlcd3a	2.28124e-21	4.03864e-20	7.47942
Brsk2	5.7293e-10	4.43861e-09	-1.15741		Tmem169	1.93869e-20	1.60125e-19	2.42437		St3gal4	4.7216e-23	4.1089e-22	3.00808		Greb1l	0	0	4.30542		Brinp3	0.000948822	0.00163658	-2.35638
Zbtb18	5.83025e-10	4.506e-09	-1.32465		Zmat2	1.99339e-20	1.64519e-19	-1.40019		Brip1	4.90806e-23	4.26374e-22	2.67873		Gria4	7.70775e-05	0.000163911	4.09732		Sinhcaf	4.27495e-06	1.47896e-05	-3.16745
Tuba1a	6.017e-10	4.63714e-09	-1.17		Trappc12	1.99725e-20	1.64713e-19	-3.91335		Stmn4	5.40585e-23	4.68398e-22	-1.98923		Grm3	3.94842e-05	9.47329e-05	-3.7502		Dipk1a	6.49286e-05	0.000139409	5.19284
Scn2b	6.23984e-10	4.79947e-09	-2.17714		Dpysl5	2.85658e-20	2.34166e-19	5.92134		Cxcr2	5.89201e-23	5.09198e-22	1.76774		Gsn	0.00933164	0.0130672	-2.93332		Fam76b	0.00791257	0.0114555	2.58932
Smad9	6.41272e-10	4.92281e-09	-1.47293		Pcdhb16	2.92467e-20	2.39389e-19	3.51196		Etfa	6.05086e-23	5.22474e-22	-2.93462		Gstz1	2.14289e-14	2.98321e-13	2.80129		Fam89b	0.0203756	0.0269327	2.62894
Psmb3	6.69053e-10	5.12608e-09	1.64919		Pnpt1	3.17524e-20	2.58734e-19	3.34895		Wdr48	6.16496e-23	5.31868e-22	-2.15831		Gtf2e1	3.1868e-18	5.44035e-17	3.65284		Fancl	0.0315804	0.0402098	2.25561
Nars1	6.7006e-10	5.13046e-09	1.65967		Psen2	3.73894e-20	3.03085e-19	1.81122		Rock2	6.88244e-23	5.92233e-22	-1.04047		Gtf2e2	0.00868447	0.0122572	2.80561		Far2	0	0	7.64178
Eif5	6.73115e-10	5.15051e-09	1.40839		Smarcc1	4.32216e-20	3.4855e-19	1.98581		Npepps	7.71123e-23	6.61842e-22	-1.69929		Mtg2	0.000582408	0.0010655	3.29025		Fastk	0.000146077	0.00028341	2.08831
Polr2e	6.88787e-10	5.25339e-09	-1.47045		Mrps34	4.87683e-20	3.91833e-19	-3.34509		Tmx4	8.367e-23	7.15669e-22	-1.3601		Gtpbp6	0	0	4.05208		Fastkd1	0	0	4.97277
Nmnat2	6.9837e-10	5.31961e-09	-1.67136		Dexi	5.14238e-20	4.12562e-19	1.62486		Trmt1	9.69718e-23	8.25209e-22	3.56839		Gtpbp8	3.72323e-29	1.1309e-27	4.17973		Fastkd2	0.0127401	0.0176175	2.65818
Bdnf	7.00123e-10	5.32952e-09	2.51932		Ago3	5.34372e-20	4.284e-19	7.42418		Rai1	9.75509e-23	8.29431e-22	-3.13995		Guf1	0.000185368	0.000362067	2.34437		Fbf1	0.0107369	0.0151189	2.30875
Dzip3	7.03902e-10	5.35483e-09	1.06213		Gpc6	5.47828e-20	4.38544e-19	1.02558		Tirap	1.0648e-22	9.03818e-22	1.27494		H2-dma	0.0319233	0.038834	2.66109		Fbl	4.23589e-05	9.75787e-05	3.94875
Abcc8	7.10516e-10	5.40105e-09	-2.26873		Cbx5	5.49355e-20	4.39444e-19	-1.93135		Map7	1.08453e-22	9.19777e-22	-2.06993		Macroh2a2	0.00971764	0.0135395	3.07595		Fbn2	0.00165774	0.00274196	4.03785
Foxred2	8.2909e-10	6.22689e-09	2.29265		Ccnl2	5.73153e-20	4.57809e-19	4.27079		Capzb	1.2443e-22	1.05083e-21	-2.0454		Haus3	0.0160746	0.0211138	3.76288		Fbrsl1	0.00207766	0.00338036	3.75644
Vcp	8.47502e-10	6.33693e-09	1.45876		Dhodh	6.50775e-20	5.18294e-19	1.8801		Enox1	1.33856e-22	1.12757e-21	1.2962		Haus7	0	0	4.03834		Fbxl12	3.31049e-18	5.0169e-17	2.68823
Ube3a	8.63623e-10	6.44114e-09	1.0123		Acot13	7.05882e-20	5.61773e-19	-4.88167		Mtch1	1.47562e-22	1.24093e-21	-1.05463		Hbegf	1.59476e-06	6.87906e-06	-3.52705		Fbxl14	0	0	2.20142
Chn1	8.91867e-10	6.6392e-09	-1.48354		Esf1	7.29486e-20	5.80135e-19	-1.08944		Kdelr2	1.5426e-22	1.29617e-21	-2.45571		Hdac8	3.01756e-11	3.29173e-10	3.84159		Fbxl22	0	0	7.8232
Inf2	9.11059e-10	6.765e-09	-3.51632		Brpf1	7.32374e-20	5.82008e-19	1.91844		Dclre1c	1.66824e-22	1.39939e-21	1.7257		Hdhd3	0	0	2.89364		Fbxl4	3.58763e-06	1.2754e-05	-2.86679
Kcnj9	9.27999e-10	6.88213e-09	-1.16121		Anxa6	7.33493e-20	5.82474e-19	1.64819		Cd300a	1.73894e-22	1.45382e-21	1.32128		Heatr3	0.00274613	0.00443247	2.44816		Fbxl6	4.77723e-13	5.21946e-12	3.24224
Mbd4	9.42499e-10	6.97213e-09	1.52484		Atp5f1e	7.72139e-20	6.11384e-19	-1.05979		Mtcl3	2.03905e-22	1.70187e-21	1.31047		Hectd2	2.10383e-05	5.72372e-05	3.22064		Fbxl7	0	0	2.8043
Mia3	1.04397e-09	7.66986e-09	1.10362		Coq8b	8.06267e-20	6.37944e-19	1.7442		Gdap1	2.15988e-22	1.79972e-21	-1.81087		Hectd3	0.00125347	0.0021735	3.4795		Fbxo46	0	0	3.71678
Sqstm1	1.04709e-09	7.67847e-09	1.02966		Ero1a	8.79819e-20	6.94129e-19	4.3078		Spns1	2.20614e-22	1.83674e-21	-1.23654		Heg1	0	0	4.98408		Fchsd1	0	0	3.01155
Psmd2	1.06736e-09	7.81739e-09	1.32595		Sptbn4	1.02487e-19	8.0682e-19	1.26897		Fert2	2.98457e-22	2.47043e-21	2.73845		Hfm1	2.28152e-23	5.13079e-22	2.67194		Fchsd2	0.0379983	0.0475995	4.03402
Ubc	1.18465e-09	8.58577e-09	1.71286		Utp20	1.04316e-19	8.20622e-19	1.51674		Phyhip	3.20471e-22	2.64829e-21	-1.06344		Hhatl	1.81303e-08	1.3136e-07	2.0312		Fcrls	0	0	3.43275
Icam5	1.22466e-09	8.85946e-09	-1.74358		Etv3	1.17947e-19	9.24528e-19	2.44712		Nsg2	3.2061e-22	2.64829e-21	-1.91713		Hira	0.00541461	0.00810943	3.60722		Ffar2	0.000311022	0.000575399	-2.87181
Slc16a2	1.24673e-09	9.01359e-09	-2.82864		Tead1	1.18604e-19	9.28342e-19	-1.91048		Ctps1	3.2074e-22	2.64829e-21	2.94666		Hirip3	0.00492211	0.00746165	3.23585		Fgf1	0.000115062	0.000229006	-2.66315
Snph	1.25499e-09	9.06772e-09	-1.73148		Zfp345	1.22319e-19	9.56731e-19	1.74268		Vmn1r58	3.29912e-22	2.72178e-21	2.22952		H2bc21	0	0	8.92197		Fgf5	0.000497836	0.000896997	5.13259
Pmepa1	1.29968e-09	9.3677e-09	-1.32056		Csf2rbp1	1.25371e-19	9.78502e-19	2.36907		Rbm4	3.32754e-22	2.74296e-21	-1.74271		Hivep3	0.00175542	0.00296473	2.73697		Fhad1	0	0	2.06796
Mink1	1.31563e-09	9.47686e-09	-1.47494		Dusp14	1.26553e-19	9.85612e-19	-8.43911		Atg7	3.33647e-22	2.74805e-21	8.27806		Hmgb3	0.0283967	0.0349401	2.64737		Fhod1	0	0	2.65185
Ssb	1.32674e-09	9.54526e-09	1.40237		Ppm1e	1.32602e-19	1.03125e-18	2.18649		Gpbp1l1	3.86917e-22	3.17373e-21	2.75998		Hook2	0	0	3.53347		Fibcd1	0	0	4.08065
Ggh	1.35016e-09	9.70611e-09	-2.5634		Scg2	1.38308e-19	1.0741e-18	1.42088		Ppa2	4.74041e-22	3.86425e-21	-3.8351		Hps1	0	0	10.2925		Filip1	0.00118611	0.00201928	5.462
Tspyl5	1.36593e-09	9.78543e-09	1.20374		Gzf1	1.61538e-19	1.25183e-18	3.23519		Antkmt	4.8922e-22	3.977e-21	-1.27347		Hps3	0.0119087	0.0161875	2.53589		Fkbp14	0	0	6.19389
Hs6st2	1.37481e-09	9.83117e-09	2.39451		Actn1	1.66143e-19	1.28661e-18	1.52901		Lekr1	5.44024e-22	4.40818e-21	5.1675		Hs2st1	1.21554e-18	2.11212e-17	2.29446		Flna	5.32319e-06	1.77574e-05	3.5224
Acot5	1.4202e-09	1.0125e-08	-2.68236		Prkaa1	1.66549e-19	1.28884e-18	1.25865		Loxl2	5.81046e-22	4.69675e-21	2.53209		Hscb	0	0	2.97473		Flt3	0	0	6.24315
Chst1	1.53436e-09	1.08863e-08	-1.39553		Tbc1d19	1.72023e-19	1.33026e-18	2.96862		Bc1	6.32738e-22	5.10634e-21	1.3649		Hsf4	0	0	3.15053		Fndc4	0.00197077	0.0032206	2.36428
Gprin1	1.54115e-09	1.09279e-08	-1.41248		Mrps35	1.86582e-19	1.43774e-18	1.98131		Ankrd13d	6.34246e-22	5.11438e-21	-3.95514		Htr2b	0	0	6.45479		Focad	0.0118627	0.0165217	2.4067
Pak6	1.57319e-09	1.1135e-08	1.31486		Paics	2.05761e-19	1.58219e-18	-2.47422		Notch2	6.6078e-22	5.31548e-21	2.03755		Htr4	0.000350863	0.000660601	2.22091		Foxb1	0.00557584	0.00835721	-3.18297
Ube2k	1.6182e-09	1.14399e-08	1.33989		Thy1	2.07608e-19	1.59527e-18	1.2705		Gatd1	6.66369e-22	5.35613e-21	-3.58246		Icmt	0	0	4.39405		Foxj3	0.00186216	0.00305618	2.15226
Rsph9	1.62987e-09	1.15086e-08	-2.69216		Klhl41	2.1935e-19	1.68431e-18	1.19014		Samd4b	7.67801e-22	6.14179e-21	7.8709		Ift140	0.00784867	0.0112107	2.10977		Foxn2	0.00449413	0.00686185	3.02357
Zeb2	1.63623e-09	1.15466e-08	-1.07562		Srgap1	2.3583e-19	1.80577e-18	6.90117		Pde4c	1.06004e-21	8.4524e-21	2.50201		Ift172	0.000228277	0.000440072	2.81732		Foxp2	1.64081e-08	1.0795e-07	-4.12806
Cdpf1	1.6506e-09	1.16341e-08	9.51383		Usp27x	2.50214e-19	1.91188e-18	7.20202		Vbp1	1.10069e-21	8.76956e-21	-2.79403		Ift52	0.00210455	0.00348889	3.96384		Foxred1	0	0	7.622
Faim2	1.65784e-09	1.16781e-08	-1.99588		Cxcr2	2.80458e-19	2.13849e-18	2.18479		Pbrm1	1.27257e-21	1.01148e-20	1.92414		Ift81	0.0077731	0.0111137	2.59889		Fras1	0.0166399	0.0224	2.37585
Ccser2	1.71115e-09	1.20095e-08	1.13935		Wnk1	3.00391e-19	2.28729e-18	-1.38742		Vdac2	1.46424e-21	1.16106e-20	-1.40245		Igfbp2	6.96691e-05	0.000150371	-3.03741		Frmd5	0.0263023	0.0339951	2.59368
Zcchc2	1.71586e-09	1.20294e-08	-2.36217		Zfp617	3.42927e-19	2.6021e-18	1.7325		Inka2	1.57507e-21	1.24696e-20	-3.09289		Igfbp3	0.0212188	0.0269329	2.30061		Frmd6	0.00632348	0.00935676	2.19428
Sphkap	1.75288e-09	1.22598e-08	-1.18678		Nelfb	3.76677e-19	2.84632e-18	2.062		Echs1	1.61983e-21	1.28037e-20	-2.79613		Igfbp4	0.0154672	0.0204031	3.16846		Frrs1	0.000404026	0.000736881	5.06685
Cdk5	1.79945e-09	1.25335e-08	-1.15677		Cnnm2	3.84645e-19	2.90453e-18	2.47543		Lsm12	1.65052e-21	1.30257e-20	1.43217		Igfbp6	0.000492022	0.000909965	-2.77593		Mrm2	9.68895e-37	5.93264e-35	3.2602
Dok4	1.8137e-09	1.26178e-08	-1.2377		Abl2	4.23627e-19	3.18567e-18	-3.10249		Ncbp1	1.97907e-21	1.55449e-20	-1.92983		Igflr1	0.0237971	0.0298491	4.24618		Furin	0.0337294	0.0426573	2.38913
Park7	2.067e-09	1.4229e-08	-1.03578		Sntb2	4.92523e-19	3.69359e-18	1.37241		Mcm6	1.99027e-21	1.56207e-20	-6.94174		Igsf9b	0.0189105	0.0243037	4.24348		Fut11	0.00244214	0.00392219	4.23542
Anp32a	2.08688e-09	1.43411e-08	-1.16572		Rgpd1	5.30059e-19	3.96963e-18	3.54371		Tceal5	1.99735e-21	1.56639e-20	-1.40959		Il11ra1	0.0234736	0.0294813	2.40295		Fxyd7	3.64225e-21	6.35979e-20	-5.31169
Nell2	2.08814e-09	1.43411e-08	-1.39827		Ralgapa1	5.44875e-19	4.075e-18	-1.41064		Nfe2l1	2.07763e-21	1.6268e-20	-2.26323		Il16	9.44143e-16	1.42646e-14	5.27021		Fyco1	0.00109079	0.00186631	2.16895
Pde4a	2.0909e-09	1.43517e-08	-1.12708		Iars2	5.75135e-19	4.29542e-18	1.0032		Dcbld2	2.0976e-21	1.64115e-20	1.10733		Il18bp	0	0	8.61972		G2e3	8.63531e-08	4.84659e-07	6.42145
Plpp3	2.14471e-09	1.46613e-08	-3.26385		Tmem184b	6.19162e-19	4.61162e-18	2.06809		Ddx1	2.26279e-21	1.76763e-20	-2.3223		Il1rapl1	0.00661018	0.00965519	2.432		Gabpa	0	0	5.89953
Ptprn	2.51667e-09	1.70265e-08	1.64727		Rab11fip3	6.23186e-19	4.63842e-18	3.39829		Stmn3	2.26537e-21	1.76826e-20	-1.15309		Il33	0.00560312	0.0083373	-2.10123		Gabra5	0.000287822	0.000534633	2.77737
Atf4	2.68283e-09	1.80574e-08	2.42591		Lypd1	8.36009e-19	6.17617e-18	-5.23864		Srrm3	2.4019e-21	1.87045e-20	2.72547		Sppl2b	0.00461798	0.00705272	2.35462		Gabrg1	3.84636e-05	9.01991e-05	-3.83276
Nat14	2.70627e-09	1.82048e-08	-1.53672		Clip3	9.47198e-19	6.98342e-18	-1.5246		Prdx5	2.4066e-21	1.87266e-20	-1.68512		Ingx	0	0	5.73862		Galc	0.000630349	0.00111647	2.23904
Pitpnc1	2.78612e-09	1.86675e-08	-1.48833		Arhgap23	9.57957e-19	7.05323e-18	1.57715		Carmil2	2.44158e-21	1.89545e-20	1.994		Ino80	0.00435982	0.00669782	3.51507		Galnt15	0	0	6.33698
Hsph1	2.81743e-09	1.88558e-08	2.02854		Tmem259	1.01245e-18	7.44944e-18	2.4565		Golga2	2.57813e-21	1.9968e-20	-3.53226		Inpp5b	0.000665309	0.00120659	2.51703		Galnt9	5.56637e-09	4.0036e-08	2.27642
Chd3	2.83824e-09	1.89844e-08	-1.42752		Man2b1	1.07522e-18	7.90059e-18	1.25512		Gps1	2.63012e-21	2.03549e-20	-4.80725		Ints12	1.77684e-05	4.98879e-05	2.23714		Gap43	3.87527e-05	9.07288e-05	-2.30876
Neurod1	2.87345e-09	1.9209e-08	-1.7452		Ppp1r14b	1.11957e-18	8.22095e-18	6.88561		Mrpl2	2.71063e-21	2.09618e-20	1.75214		Ints3	0.0132813	0.0178171	2.06964		Gas2l1	0.0101103	0.0143175	2.27789
Slit1	2.98304e-09	1.9874e-08	-1.72052		Dyrk1a	1.14314e-18	8.38838e-18	1.00427		Selenom	3.24676e-21	2.50304e-20	-2.01419		Ints6	0.0047328	0.00721112	2.89734		Gas6	0.0257337	0.033339	2.8558
Rnf19b	3.11575e-09	2.06765e-08	-4.57907		Tigit	1.38205e-18	1.00873e-17	1.88271		Mak16	3.61507e-21	2.77627e-20	1.83774		Ints7	0.017239	0.0224166	2.74549		Gatad2a	0.000344397	0.000633364	3.963
Xpa	3.27861e-09	2.16476e-08	-1.577		Adgrb1	1.43921e-18	1.04835e-17	3.19761		Alcam	3.64539e-21	2.79741e-20	-1.16036		Iqcc	0	0	2.30305		Gba1	8.99015e-13	9.68404e-12	2.30693
Stxbp5l	3.28876e-09	2.17025e-08	1.25408		Slc35b4	1.56381e-18	1.13306e-17	1.3757		Cep57	3.73883e-21	2.86472e-20	-4.48046		Irf1	0.0289293	0.0355346	2.59508		Gba2	9.50716e-07	4.06357e-06	5.55178
Carmil1	3.44366e-09	2.26361e-08	-3.18302		Snx19	1.57905e-18	1.14335e-17	2.36522		Cox7b	3.96151e-21	3.03301e-20	-1.94412		Itfg2	0.0102649	0.0141956	2.65038		Gcat	3.46747e-06	1.23844e-05	2.40145
Ggnbp2	3.45861e-09	2.27141e-08	1.04836		Dcaf10	1.65941e-18	1.19835e-17	1.53685		Api5	4.35776e-21	3.33129e-20	-1.77366		Itgb5	0	0	3.00278		Gdf11	0.00609845	0.00905298	-3.19992
Tln2	3.53078e-09	2.31364e-08	-1.67564		Ubp1	1.9159e-18	1.3772e-17	1.30635		Abhd13	4.5171e-21	3.45046e-20	3.68926		Itpkc	0	0	5.92918		Gdpd5	0.0385157	0.0481687	2.22136
Pdzd2	3.58868e-09	2.34586e-08	1.51276		Dcaf12	2.27377e-18	1.62909e-17	5.78247		Cul1	4.68516e-21	3.57337e-20	-1.59809		Izumo4	0	0	3.75996		Gemin2	0.000160573	0.000308766	-3.80797
Kcnh4	3.644e-09	2.37939e-08	2.07556		Cck	2.31997e-18	1.6611e-17	-2.77704		Runx1t1	4.7089e-21	3.58874e-20	4.76597		Jakmip2	0.00256633	0.00417568	2.11024		Gfm1	0.000712969	0.00125371	2.78738
Dpysl2	4.02443e-09	2.59729e-08	-1.05083		Morf4l1	2.39431e-18	1.7132e-17	-1.03598		Smg5	4.81059e-21	3.66345e-20	1.28467		Jazf1	0.00860207	0.0121621	2.68138		Gfod2	0.0182183	0.0242939	3.68734
Ywhah	4.05033e-09	2.61004e-08	-1.0513		Arl6ip1	2.48988e-18	1.77693e-17	1.00306		Supt4a	5.071e-21	3.85296e-20	-3.05783		Jrk	0.00193811	0.00324054	3.81413		Ggcx	0.0334033	0.0422868	2.30293
Atp2b4	4.05435e-09	2.61121e-08	-1.69011		Ankrd17	2.53494e-18	1.80791e-17	-1.43214		Phf3	5.9046e-21	4.46935e-20	5.01962		Jup	0.021535	0.0272692	3.73855		Ggt7	5.52303e-06	1.82911e-05	3.83973
Hspa1a	4.10996e-09	2.64413e-08	1.28061		Npat	2.75305e-18	1.95707e-17	2.58533		Fam169a	6.10455e-21	4.6172e-20	2.52584		Kansl3	0.000123962	0.000249717	4.17967		Glis3	0.00210416	0.00341911	3.69739
Ptger1	4.30155e-09	2.75538e-08	1.78063		Mettl9	2.85945e-18	2.02742e-17	-2.19175		Rpl8	6.36557e-21	4.80735e-20	-1.76801		Kars1	0.0168897	0.022031	2.32919		Glp2r	1.89604e-09	1.46572e-08	-5.48498
Tmem59l	4.36394e-09	2.78777e-08	-1.41785		Cdh10	2.99647e-18	2.1232e-17	7.75642		Cystm1	6.59904e-21	4.97991e-20	-3.30552		Kat5	0.00971403	0.0135378	2.23277		Gls2	3.96142e-38	2.93196e-36	2.90758
Epn2	4.43596e-09	2.83225e-08	-1.15806		Eif4h	3.0871e-18	2.18458e-17	-3.62193		Pigk	6.75569e-21	5.09428e-20	-3.31682		Kbtbd8	0	0	3.63677		Bicral	0.00747932	0.0108859	2.48411
Nhsl2	4.48594e-09	2.86261e-08	-2.34712		Mettl25b	3.79849e-18	2.67585e-17	1.04473		Serpinb8	7.35376e-21	5.53275e-20	-1.54011		Kcng2	0.00758355	0.0108859	2.03454		Gm10516	0.0169761	0.0228012	2.70524
Psmd1	4.49777e-09	2.86861e-08	1.75849		Atp1b1	3.87825e-18	2.72852e-17	-1.04628		Trps1	7.81263e-21	5.86475e-20	7.92538		Kcnh3	0.0364086	0.0436455	2.04961		Gm11744	1.94282e-08	1.25779e-07	2.32139
Tmem198	4.56244e-09	2.90671e-08	1.44202		Bc003965	3.89155e-18	2.73612e-17	-4.84536		Orc4	7.99831e-21	5.99963e-20	5.11618		Kcnh4	0	0	3.09192		Gm13315	0.0238912	0.0311419	2.45941
Shank1	4.68358e-09	2.97425e-08	1.07194		Rgs7	4.25072e-18	2.98096e-17	1.24163		Camk2a	8.73709e-21	6.54889e-20	-1.34257		Kcnj10	7.40762e-06	2.47086e-05	-3.06377		Gm13544	3.70411e-05	8.74714e-05	-3.97868
Gnb2	4.73875e-09	3.00605e-08	-1.20127		Atxn7l3b	4.34412e-18	3.04451e-17	-1.35317		Gm20337	8.75275e-21	6.55571e-20	2.14086		Kcnj11	0.0394147	0.0468886	2.58986		Gm14326	0	0	3.60713
Pnck	4.75883e-09	3.01555e-08	-2.49951		Agpat3	4.46916e-18	3.12813e-17	1.63762		Pttg1ip	9.34323e-21	6.98229e-20	1.74552		Kcnj3	0.0300623	0.0367883	2.0097		Gm14327	0	0	3.84262
Rnasel	4.84687e-09	3.06311e-08	-1.8816		Tmx3	4.79346e-18	3.34868e-17	1.23649		Atg5	1.31212e-20	9.68973e-20	1.55801		Kcnj6	0.00258842	0.00420578	2.29705		Gm14436	0	0	3.30902
Rab26	4.91065e-09	3.09831e-08	-3.59026		Steap2	5.4507e-18	3.79084e-17	1.32623		Napsa	1.355e-20	9.99166e-20	-1.49105		Kcnk12	0.00327713	0.00519208	3.26348		Gm15645	1.19656e-14	1.45412e-13	-2.12671
Ccar1	5.17355e-09	3.24868e-08	1.09628		Irf2	5.97462e-18	4.14466e-17	1.63245		Gm10785	1.36586e-20	1.00643e-19	1.97565		Kcnq3	0.00808781	0.0115152	4.6899		Gm16157	0.00785855	0.0113844	-2.19139
Nt5dc2	5.19136e-09	3.25813e-08	-2.15345		Tcf20	6.28043e-18	4.34851e-17	1.86072		Pdcd4	1.38717e-20	1.02138e-19	-1.05318		Kctd12b	0.00116567	0.00202938	-2.14796		Gm166	0	0	6.26394
Naaa	5.3568e-09	3.35483e-08	-2.95226		Ankib1	6.9174e-18	4.77441e-17	1.55859		Phc1	1.46868e-20	1.07981e-19	-4.50328		Kctd5	0	0	6.29014		Gm20752	0	0	4.81699
Mob4	5.44391e-09	3.40263e-08	1.34757		Zfp182	7.87448e-18	5.41786e-17	7.08868		Nanog	1.47874e-20	1.08561e-19	2.32754		Poglut2	0	0	3.96212		Gm3893	0.00472973	0.00718479	3.5806
Caly	6.64933e-09	4.08622e-08	-1.60711		Soat1	8.99498e-18	6.17323e-17	3.76291		Gm20063	1.59159e-20	1.16759e-19	6.86691		Kdm1b	0.025086	0.0312746	2.16232		Gm4922	0.00225433	0.00364711	5.01875
Dock9	6.73496e-09	4.12809e-08	-1.77533		Tpi1	9.10846e-18	6.24719e-17	-1.86847		Prkdc	1.71594e-20	1.25697e-19	-5.0996		Kif13a	0	0	5.15245		Gm5126	0	0	3.57091
Tax1bp1	6.98617e-09	4.27097e-08	1.06611		Tomm7	9.17279e-18	6.28736e-17	-1.80675		Adss2	1.92581e-20	1.40864e-19	-2.53201		Kif16b	0.00444337	0.00681274	3.02988		Gm5531	0.000401518	0.000732658	-3.26148
Ehbp1l1	7.38776e-09	4.48396e-08	-2.68309		Kcmf1	1.1628e-17	7.95027e-17	3.089		Usp9x	2.15461e-20	1.5714e-19	-2.57022		Kifc3	2.28674e-06	9.28513e-06	4.11798		Gm5577	0	0	3.87969
Syt4	7.4609e-09	4.52602e-08	1.5324		Anapc13	1.17408e-17	8.02236e-17	-2.56352		Mbd3	2.1889e-20	1.59525e-19	2.1147		Klhdc1	0	0	3.46031		Gm6402	0.00180482	0.00296802	3.93326
Rhobtb2	7.75776e-09	4.68923e-08	-1.93508		Cdk14	1.30446e-17	8.87995e-17	-1.80031		Homer1	2.27728e-20	1.65724e-19	-2.5576		Klhl28	0.0135522	0.0181493	2.78713		Gm6525	0	0	4.5085
Ccl27a	7.92356e-09	4.77722e-08	-1.04482		Bcl11b	1.36598e-17	9.2871e-17	-1.06745		Dmpk	2.55092e-20	1.85368e-19	1.77466		Klhl40	0	0	3.58405		Gm6994	3.65628e-10	3.06167e-09	4.9176
Mmp17	8.24002e-09	4.94276e-08	-1.99681		Myl6	1.54434e-17	1.04607e-16	-1.46971		Stxbp1	2.5635e-20	1.86012e-19	-1.02437		Krba1	0.00661684	0.00966371	2.40587		Gm8179	0.0159465	0.0215425	5.30396
Map6	8.33476e-09	4.99451e-08	-1.25429		Bex2	1.59939e-17	1.08201e-16	-1.58122		Ncdn	2.62704e-20	1.90485e-19	-1.83146		Kri1	0.0145294	0.0193076	2.02837		Gmip	0	0	5.5848
Adora1	8.41654e-09	5.03584e-08	-1.42474		Unc13c	2.29239e-17	1.53845e-16	1.29647		Gpr75	2.73717e-20	1.98039e-19	7.59836		Krt12	0.0147707	0.019597	4.97544		Gmpr2	0	0	3.07394
Plk2	8.59383e-09	5.12632e-08	2.42309		Ppargc1b	2.4077e-17	1.61484e-16	3.51424		Cst3	3.14862e-20	2.27479e-19	2.40116		Lama2	0.000314883	0.000597379	3.43655		Gnb1l	1.58178e-13	1.78604e-12	-2.71698
Mtdh	8.60592e-09	5.12792e-08	1.07228		Serpinb8	2.47221e-17	1.6571e-16	-2.27243		Cdkn1b	3.42036e-20	2.46222e-19	2.03473		Ldb2	0.00772583	0.0110582	-2.85102		Gng12	0.0318484	0.0405174	2.10047
Tmem132a	8.8979e-09	5.281e-08	-1.1444		Arfrp1	2.58122e-17	1.72804e-16	3.56884		Orc6	3.76176e-20	2.7002e-19	1.62914		Ldlrad3	0.00115945	0.00202005	3.92626		Gng4	0.000136882	0.000267186	-3.8728
Spon1	9.80873e-09	5.76648e-08	-1.39941		Slc12a9	2.70467e-17	1.80405e-16	1.50239		Cnot10	4.43973e-20	3.18457e-19	-5.77488		Lef1	8.67347e-05	0.000181802	-5.36633		Golga3	1.08273e-08	7.33672e-08	2.19961
Exoc4	9.90217e-09	5.81851e-08	-1.04696		Phf6	3.27781e-17	2.17043e-16	-4.09842		Snhg12	4.59124e-20	3.29088e-19	2.51307		Lgr5	0.000464268	0.000861359	-2.4484		Golim4	0.00216622	0.00351498	4.07398
Orai2	9.91734e-09	5.824e-08	-1.47364		Aprt	3.3753e-17	2.23363e-16	-2.76828		Tcf7l2	5.1473e-20	3.68417e-19	-1.16021		Lig3	0.0305995	0.0373831	2.76506		Gorab	0.0241133	0.0313993	3.64942
Med13	1.00919e-08	5.91249e-08	1.26363		Dgki	3.41066e-17	2.25566e-16	1.42058		Rps18	5.23585e-20	3.74487e-19	-1.3334		Lin9	0.00989143	0.0137523	4.03678		Gp1bb	0	0	4.24429
Mrps12	1.00922e-08	5.91249e-08	1.25952		Ube2w	3.51005e-17	2.31859e-16	-1.38076		Elavl1	5.33547e-20	3.81067e-19	-1.32562		Lingo3	0.0189469	0.0243425	3.4998		Gpatch2	0.00335392	0.00524699	2.21762
Rab3a	1.01907e-08	5.96429e-08	-1.94546		Rnf149	3.59833e-17	2.37546e-16	1.73588		Zc3h4	5.65777e-20	4.02935e-19	3.81657		Liph	0	0	3.29622		Gpatch2l	0.000202112	0.000382486	-2.23992
Elmod3	1.02235e-08	5.97907e-08	-2.63312		Kcnc2	3.77393e-17	2.48988e-16	2.04156		Tmeff1	6.10382e-20	4.34083e-19	-5.36689		Lipt2	7.93071e-06	2.61982e-05	2.19972		Gpn3	1.57392e-22	2.96974e-21	2.11153
Sorcs3	1.02261e-08	5.97907e-08	6.14809		Entrep3	3.78356e-17	2.49473e-16	2.74052		Ankmy2	6.87456e-20	4.87163e-19	2.24596		Lmf2	0	0	2.75992		Gpr107	0	0	4.31264
Fam163b	1.05402e-08	6.14447e-08	-2.0557		Ephb2	4.10295e-17	2.69717e-16	1.72848		Elob	7.47793e-20	5.29171e-19	-1.88498		Lnx1	0.0245009	0.0306236	3.11545		Adgrf5	2.17648e-06	8.27872e-06	-3.10884
Map3k4	1.07867e-08	6.27883e-08	-1.51649		Mras	4.13654e-17	2.71762e-16	-1.94298		Tsnax	8.37739e-20	5.91983e-19	-3.12047		Lnx2	0.032503	0.0394775	3.87467		Gpr12	0.0360371	0.0452812	2.65736
Rasa1	1.09243e-08	6.34644e-08	-2.22547		Fgfr2	4.19732e-17	2.75424e-16	1.42222		Smn1	8.93183e-20	6.29826e-19	1.96749		Lonrf3	0.000958392	0.00169784	2.8538		Adgra2	0.0296016	0.0378964	3.07737
Tmem167a	1.0937e-08	6.35065e-08	1.55654		Grm5	4.69973e-17	3.07468e-16	-1.35596		Pappa	8.95424e-20	6.30961e-19	7.49488		Lpar1	7.20017e-06	2.4202e-05	-5.12619		Gpr137b-ps	0	0	6.40962
Ankrd46	1.12241e-08	6.495e-08	-1.24307		Yipf3	4.78762e-17	3.12843e-16	1.04674		Myl12b	9.07031e-20	6.3869e-19	-1.35673		Lrfn2	0.0358907	0.0431131	2.39506		Gpr137c	0.0310857	0.0396195	4.11941
Cdk11b	1.14305e-08	6.59828e-08	1.41444		Pdcd6ip	5.28457e-17	3.4408e-16	-3.6733		Rab21	9.19924e-20	6.47313e-19	3.22309		Lrig1	0	0	5.5554		Gpr146	0	0	7.88051
Fyttd1	1.18918e-08	6.83115e-08	1.26368		Chchd6	6.08052e-17	3.94493e-16	-2.09699		Commd2	1.00095e-19	7.03341e-19	2.20181		Lrp3	0.0199971	0.0255542	2.79848		Gpr26	0	0	4.54724
Psd3	1.21492e-08	6.94854e-08	1.33381		Kcnj2	6.47982e-17	4.19154e-16	7.31296		Hopx	1.08003e-19	7.56775e-19	5.96742		Lrrc1	2.11041e-12	2.54162e-11	7.31149		Gpr3	4.89857e-22	9.09326e-21	-3.27364
Tamalin	1.23812e-08	7.06755e-08	1.66986		D7ertd715e	6.92233e-17	4.47248e-16	2.3736		Acsl5	1.10275e-19	7.72156e-19	2.36456		Lrrc17	4.88336e-11	5.20565e-10	-3.18423		Gpsm2	0.000187933	0.000357955	4.59423
Slc50a1	1.25876e-08	7.1819e-08	-1.84196		Thap6	7.53958e-17	4.86552e-16	1.87879		Pclo	1.18589e-19	8.28635e-19	-1.30488		Lrrc8b	0.0352329	0.0424057	2.25845		Gpt2	1.42636e-05	3.98228e-05	2.17518
Atp6v0e2	1.27327e-08	7.26112e-08	-1.06294		Prrc2a	7.57162e-17	4.88332e-16	2.27394		Cmpk1	1.51141e-19	1.04876e-18	-3.63215		Lrrc8d	0.00735269	0.0106059	3.06928		Gpx3	0.00627855	0.00929507	-4.49342
Cds2	1.32358e-08	7.519e-08	-1.11631		Cers4	7.71693e-17	4.97116e-16	1.34752		Lsm4	1.71673e-19	1.18875e-18	-3.17818		Lrriq1	7.55877e-14	1.00789e-12	3.11194		Greb1l	0.00809719	0.0117109	3.78539
Rnf4	1.34204e-08	7.62018e-08	1.8885		Atp5f1c	7.85813e-17	5.05913e-16	-1.53286		Tmem38a	1.85129e-19	1.27927e-18	-2.98071		Lurap1	0	0	5.82149		Gria4	0.00624551	0.00925213	2.88085
Nefm	1.38082e-08	7.812e-08	2.0078		Cbx3	8.02619e-17	5.16125e-16	-1.20536		Zcchc7	1.98828e-19	1.37109e-18	1.525		Lyrm1	0	0	2.87179		Grin2a	0.000330384	0.000609253	4.10255
Dcaf7	1.38349e-08	7.81788e-08	-1.03316		Osbpl7	8.74706e-17	5.61158e-16	2.81718		Kifc2	2.00233e-19	1.37983e-18	-3.51745		Lysmd3	1.60484e-07	9.13237e-07	2.16334		Grpel2	0.00156121	0.00259756	4.84076
Slc25a53	1.41298e-08	7.9655e-08	1.14408		Rc3h2	9.23824e-17	5.91627e-16	-3.54979		Itpr1	2.01366e-19	1.38668e-18	1.60158		Lzic	0	0	4.07689		Grwd1	0.000545309	0.000976093	3.95487
Ubald1	1.41803e-08	7.99013e-08	-1.21569		Zfp12	1.0035e-16	6.40773e-16	1.68951		Wwp2	2.47653e-19	1.69608e-18	6.21917		Mad2l2	0.0252882	0.0314964	2.14337		Gtf2b	9.54026e-35	4.65727e-33	2.19785
Impact	1.46692e-08	8.2263e-08	1.58038		Calm2	1.06627e-16	6.80456e-16	-1.28202		Rnf6	2.61135e-19	1.78231e-18	-1.37386		Maged2	0.0157009	0.020681	2.04137		Gtf2e1	0	0	5.11586
Sfxn1	1.47093e-08	8.24491e-08	-1.69312		Tapbp	1.54034e-16	9.7671e-16	2.10742		Dennd6a	2.70011e-19	1.84038e-18	1.81208		Magi3	7.71373e-05	0.000163978	-2.76312		Gtf2ird1	5.77815e-18	8.63111e-17	7.02171
Cox14	1.47324e-08	8.25395e-08	-1.13389		Polr2g	1.60666e-16	1.01699e-15	-1.73804		Dnttip2	2.78319e-19	1.89572e-18	2.67584		Mrtfa	1.51144e-06	6.5779e-06	-3.44548		Gtf3c2	0.00256727	0.00410706	2.97216
Dgcr2	1.50945e-08	8.44474e-08	-1.18752		Ndufa4	1.70726e-16	1.07817e-15	-1.24607		Shprh	2.96733e-19	2.01976e-18	1.96883		Mamld1	1.28292e-10	1.31026e-09	2.10743		Gtpbp6	2.17104e-21	3.86142e-20	4.9277
B3gat1	1.54966e-08	8.62883e-08	-1.33353		Rbm25	1.7684e-16	1.11613e-15	1.08134		Golph3l	3.37202e-19	2.28899e-18	5.00193		Man2c1	0.00152718	0.00260714	2.99302		Gyk	0.00386341	0.00595553	4.72562
Trappc2l	1.57748e-08	8.75481e-08	-2.36006		Rnf217	1.82624e-16	1.15131e-15	2.76804		Serac1	4.11421e-19	2.78147e-18	4.57156		Maneal	0.00662647	0.00967174	2.23837		H2-k1	1.7442e-12	1.83573e-11	-3.95859
Rgs7	1.59613e-08	8.84579e-08	1.56205		Rnft1	1.86703e-16	1.17617e-15	8.00516		Cacna1a	4.12677e-19	2.78808e-18	-2.28552		Mansc1	0	0	5.5865		Harbi1	1.04934e-09	8.39468e-09	-2.34095
Lrrc4c	1.63821e-08	9.04927e-08	1.87022		Dph6	1.86782e-16	1.17617e-15	-3.55864		Myl12a	4.73839e-19	3.19267e-18	1.60668		Maob	0.0363569	0.0435931	3.3038		Haus7	0	0	8.28231
Mapk4	1.65362e-08	9.11732e-08	3.57273		Zfp607	1.89256e-16	1.19106e-15	1.79383		Atp1a3	5.98075e-19	4.01765e-18	-2.27547		Map2k6	0.0318224	0.0387313	2.68249		Haus8	5.7753e-15	7.18593e-14	5.18294
Cygb	1.67395e-08	9.22077e-08	-2.63385		Ankrd50	1.89974e-16	1.19489e-15	6.56391		Ppp4r2	6.14137e-19	4.12131e-18	2.10877		Map3k13	2.68625e-13	3.45959e-12	3.0005		Hdac10	0	0	9.05328
Fzd9	1.78437e-08	9.76523e-08	1.26153		Au041133	1.95766e-16	1.22919e-15	2.80853		Cfap36	6.46762e-19	4.32574e-18	-2.13972		Map3k3	0.00602511	0.00888159	3.08442		Hdac3	1.02348e-05	3.05975e-05	5.44658
Adrm1	1.85141e-08	1.01051e-07	1.24388		Smtnl2	2.17814e-16	1.36293e-15	2.61438		Zfp746	6.47718e-19	4.32923e-18	2.34032		Map4k5	0.00441275	0.00677289	2.13837		Hdac4	0.00593544	0.00884304	4.16553
Galnt16	1.91112e-08	1.03962e-07	-1.56452		Lca5	2.18803e-16	1.36787e-15	2.67953		Atp1a2	7.14722e-19	4.76116e-18	2.79727		Mapk1ip1	8.96314e-22	1.84209e-20	2.0688		Hdac7	0	0	3.49653
Hsf2	1.92319e-08	1.0457e-07	1.53103		Dancr	2.18855e-16	1.36787e-15	2.23234		Uba1y	8.21325e-19	5.46039e-18	1.70478		Mapk7	0.000941021	0.00167051	2.04462		Hddc2	2.10594e-06	8.05312e-06	-3.62479
Arhgap39	1.93447e-08	1.05135e-07	-1.83225		Ankra2	2.19893e-16	1.37279e-15	-1.3888		Prkcz	8.30541e-19	5.51799e-18	-3.07733		44994	0.0121389	0.0164545	-3.16815		Hectd2	0.000184642	0.000352154	4.57219
Tubgcp2	1.98676e-08	1.07729e-07	-1.36581		Prelid3b	2.42051e-16	1.5051e-15	2.49417		Coa8	8.75004e-19	5.80568e-18	-1.79455		Mars2	0.0127489	0.0171877	5.15409		Helq	3.17866e-17	4.52427e-16	2.42254
Ttll7	2.00591e-08	1.08568e-07	1.60805		Cacna1a	2.73122e-16	1.69348e-15	-2.1378		Brd7	1.04704e-18	6.91958e-18	1.32976		Maz	0.00257992	0.00419372	2.22958		Helz	0.00451525	0.00689182	3.15698
Ctsk	2.0357e-08	1.10079e-07	-5.17014		Dpagt1	2.73363e-16	1.69401e-15	2.92056		Ptk2b	1.18056e-18	7.77632e-18	-2.22791		Mcm4	0	0	4.11955		Hipk2	0.0232974	0.0304266	2.00617
Ctsd	2.0389e-08	1.10202e-07	1.60496		Gnao1	2.73563e-16	1.69429e-15	1.48481		Babam2	1.23098e-18	8.09775e-18	-2.7937		Mcm7	1.6223e-05	4.62823e-05	4.08503		H2bc21	6.36278e-06	2.07192e-05	5.55373
Cisd3	2.05995e-08	1.11186e-07	-2.10598		Baiap2	3.04213e-16	1.87986e-15	-1.19586		Igfbp2	1.3154e-18	8.63035e-18	1.67591		Mcts2	5.92574e-24	1.36678e-22	5.10977		H4c14	0	0	3.57995
Ier3ip1	2.08638e-08	1.1251e-07	1.20811		Dnajb5	3.06763e-16	1.89347e-15	1.07827		Bicd2	1.37514e-18	9.01642e-18	1.53863		Med21	0.0212066	0.0269214	2.02531		Hivep3	1.89596e-42	3.884e-40	2.41579
Mpp3	2.14609e-08	1.15624e-07	-1.58167		Psmb5	3.16717e-16	1.9505e-15	-1.51665		Cox20	1.60774e-18	1.05002e-17	-1.6596		Med9	0.00169716	0.00287507	2.2327		Hmbox1	0	0	4.93977
Hars1	2.20108e-08	1.18425e-07	1.75862		Plagl2	3.59353e-16	2.20809e-15	7.63596		Mtpn	1.71573e-18	1.11835e-17	-1.60871		Medag	0.00569492	0.00845769	-2.32153		Hmbs	0	0	8.0711
Ypel5	2.21929e-08	1.19296e-07	1.24398		H3-3a	3.62015e-16	2.22319e-15	-2.05074		Thap2	2.13804e-18	1.3891e-17	2.82905		Megf8	0.000484446	0.000896379	2.24126		Hnmt	2.74747e-14	3.26622e-13	-3.19808
Cuedc2	2.27718e-08	1.22185e-07	-1.25225		Lrfn3	3.68722e-16	2.26184e-15	2.00744		Guk1	2.23929e-18	1.453e-17	-1.71696		Meis2	4.0446e-05	9.64666e-05	-2.66407		Rida	0.00196734	0.00321593	2.68393
Trp53bp1	2.29676e-08	1.23157e-07	1.07217		Rgs8	3.92098e-16	2.40254e-15	2.07465		Cdc5l	2.39211e-18	1.55014e-17	1.71528		Metrn	1.53264e-16	2.39928e-15	-3.23662		Hspa1a	0	0	4.62048
Rab28	2.29796e-08	1.23157e-07	-1.37325		Pcbp4	3.97023e-16	2.43135e-15	-1.41392		Alkbh7	2.41974e-18	1.56602e-17	-2.73545		Mettl5	0	0	4.94819		Ift25	7.17739e-05	0.000151553	2.81472
Nedd4	2.29842e-08	1.23157e-07	-1.04011		Actb	4.37723e-16	2.6716e-15	-1.36033		Rad52	2.87273e-18	1.84961e-17	3.51428		Mfsd10	5.13756e-05	0.000116953	5.29621		Iars1	0.00059259	0.00105366	2.71374
Glcci1	2.34256e-08	1.25237e-07	1.91558		Adrm1	4.63329e-16	2.82158e-15	2.46559		Dnajc19	3.09778e-18	1.99195e-17	-2.64045		Mfsd3	0.0132503	0.0177827	4.78203		Cilk1	9.96995e-06	2.99177e-05	3.11634
Rbm34	2.36924e-08	1.26373e-07	1.29795		Sparc	4.66684e-16	2.84043e-15	1.88249		Grn	3.46444e-18	2.22342e-17	-5.29337		Mgat4b	4.04048e-09	3.33918e-08	4.57869		Ier5	0.0187099	0.0248858	3.08298
Id2	2.37023e-08	1.26373e-07	1.39154		Sltm	5.50345e-16	3.32921e-15	1.25501		Tnk2	3.605e-18	2.31066e-17	-2.32879		Mgp	5.01319e-23	1.09578e-21	-8.53258		Ifi27l1	2.43117e-05	6.18687e-05	3.20519
Rbbp7	2.50929e-08	1.33365e-07	1.14781		Ipo7	5.77099e-16	3.48912e-15	2.35637		Slc6a18	3.93774e-18	2.5191e-17	2.78721		Mier3	5.14223e-06	1.84458e-05	3.5373		Ifrd2	0	0	2.81887
Hspd1	2.60184e-08	1.37911e-07	1.0001		Phxr4	5.8903e-16	3.55928e-15	2.58263		Gcsh	4.16236e-18	2.65939e-17	-4.53732		Mif4gd	5.41999e-24	1.25508e-22	5.73956		Ift122	0	0	2.23699
Cops5	2.654e-08	1.40424e-07	1.16879		Prkab1	6.73875e-16	4.05849e-15	3.5397		Ifi203	4.6283e-18	2.95331e-17	2.72632		Mki67	6.61276e-05	0.000143949	2.57322		Ift140	0	0	2.81097
Epas1	2.67759e-08	1.41609e-07	-2.18295		Zfp710	6.76604e-16	4.07268e-15	7.09215		Zrsr2p1	4.75695e-18	3.03347e-17	2.87139		Mknk1	0.00182351	0.00306998	2.24192		Ift43	0	0	2.9679
Zfp445	2.806e-08	1.47804e-07	1.2622		Chd3	7.67568e-16	4.60498e-15	1.00721		Scn2b	4.81864e-18	3.07085e-17	-3.11379		Mkx	4.48253e-06	1.64373e-05	4.46286		Igbp1	0.00138416	0.00232763	2.73879
Uqcr11	2.83413e-08	1.49139e-07	-1.33585		Psma6	8.12227e-16	4.85957e-15	-1.24621		Camlg	5.06925e-18	3.2285e-17	5.07186		Mmab	0.00250406	0.00408688	4.84422		Igf2	1.97094e-13	2.21455e-12	-2.52571
Stmn3	2.8364e-08	1.49139e-07	-1.03483		Mrpl28	8.52957e-16	5.09767e-15	-1.65881		Basp1	5.12489e-18	3.26186e-17	1.4019		Mocos	2.31778e-10	2.30282e-09	4.47172		Igfbp6	1.4013e-45	1.23659e-42	-3.96626
Kcnh1	2.83641e-08	1.49139e-07	-1.72003		Brsk2	8.69851e-16	5.19579e-15	2.28147		Rnf19a	5.74445e-18	3.64459e-17	6.54346		Mocs1	8.92596e-08	5.44214e-07	4.86096		Ighmbp2	0.0158231	0.0214009	2.12173
Psmd7	2.88902e-08	1.51515e-07	1.07011		Cntn3	9.67173e-16	5.76489e-15	6.40894		Capza2	6.80055e-18	4.29827e-17	-2.17928		Mog	9.49946e-17	1.51551e-15	-6.23719		Igsf10	2.43473e-32	9.66478e-31	6.56062
Ubxn1	2.90174e-08	1.52092e-07	1.42024		Rpl27	1.01449e-15	6.02678e-15	-1.11259		Ms4a6c	7.64939e-18	4.82563e-17	2.23734		Mogs	0	0	4.79391		Ikzf2	0	0	3.70204
Psma2	2.92415e-08	1.52935e-07	1.56937		Cox7b	1.06491e-15	6.31601e-15	-1.49747		Icam5	7.9667e-18	5.02264e-17	-4.22028		Mon1a	0.00433931	0.00667947	3.36715		Il15ra	0	0	2.66384
Tacc1	3.10004e-08	1.61347e-07	1.5193		Tyr	1.08656e-15	6.44088e-15	2.13094		Gnpat	8.30528e-18	5.2295e-17	-7.43492		Morc2a	0.00480709	0.00731193	3.04816		Il18	0.0212813	0.0280266	2.86439
Stim2	3.1736e-08	1.6474e-07	-1.38061		Bdnf	1.20648e-15	7.13238e-15	2.92516		Mtmr3	8.98465e-18	5.65371e-17	2.56105		Morc3	0.00070369	0.00127001	4.80655		Ilvbl	0	0	6.68283
Enc1	3.18056e-08	1.65028e-07	-1.21764		Ai115009	1.43826e-15	8.48427e-15	1.03418		Gm7102	9.75466e-18	6.13439e-17	2.0917		Mphosph9	7.65137e-06	2.53843e-05	3.32758		Impdh2	7.4037e-16	9.61893e-15	2.22753
Fyn	3.22749e-08	1.67096e-07	-1.0053		Dynll1	1.52019e-15	8.95303e-15	-1.81097		Memo1	1.22248e-17	7.6685e-17	3.31762		Kif20b	0.00122758	0.00213145	3.60672		Ing5	9.00965e-11	8.0623e-10	2.43558
Diras1	3.3025e-08	1.70158e-07	-2.00074		Chst1	1.56811e-15	9.22879e-15	1.92974		Tubgcp3	1.2972e-17	8.13207e-17	1.00182		Mrc2	1.41335e-07	8.16585e-07	-4.50995		Ino80	0.0106514	0.01501	2.00916
Ubtf	3.32134e-08	1.71054e-07	-1.25826		Ctxn1	1.75669e-15	1.03014e-14	-2.37697		Rps10	1.40936e-17	8.81314e-17	1.90928		Mri1	0.000312738	0.000593501	4.34433		Inpp5a	0.0195119	0.0258685	2.20982
Ccnt2	3.59306e-08	1.83765e-07	1.33549		Zfp185	2.06635e-15	1.20913e-14	2.40877		Herpud1	1.43749e-17	8.9834e-17	-3.71331		Mrpl16	0.000181261	0.000354755	2.45738		Inpp5b	0.0059114	0.00881065	3.72494
Phactr1	3.60007e-08	1.83964e-07	-1.13099		Mlf2	2.20885e-15	1.28976e-14	-1.36448		Bri3bp	1.44308e-17	9.00711e-17	2.07209		Mrps15	0.00535135	0.00802909	2.15075		Ints10	0.00188762	0.00309486	3.03851
Sesn2	3.61441e-08	1.84617e-07	2.33552		Car5b	2.55825e-15	1.48979e-14	1.45735		Kif1b	1.52116e-17	9.48257e-17	1.31422		Mrs2	0.00198295	0.00330887	3.3234		Ints3	0.00827035	0.0119298	2.98172
Wdhd1	3.78427e-08	1.92183e-07	-2.32708		Trim9	2.59072e-15	1.50789e-14	1.79276		Fau	1.59727e-17	9.93847e-17	1.20874		Msantd2	0.0121176	0.0164314	2.85782		Ints4	9.592e-05	0.000194244	6.48183
Drosha	3.79037e-08	1.92355e-07	-1.14256		Wnt4	2.64653e-15	1.53873e-14	1.52821		Dbpht2	1.66049e-17	1.03126e-16	-2.62104		Msantd3	0.00857025	0.0121259	3.08377		Ints6	0	0	4.27279
Htatsf1	3.82203e-08	1.93795e-07	-1.35773		Orai3	3.07536e-15	1.78427e-14	1.05486		Cstf2t	1.76441e-17	1.09376e-16	-1.92007		Msh2	0.0267717	0.0331429	3.32146		Ints7	3.11657e-05	7.56879e-05	2.05944
Stard10	3.82649e-08	1.93938e-07	-1.98862		Cops6	3.25099e-15	1.87917e-14	-2.13627		Lratd1	1.77563e-17	1.10003e-16	-2.41163		Sh2d1a	0.00305168	0.00487474	2.37887		Ints9	3.3581e-05	8.05439e-05	-2.48301
Ncoa1	3.86247e-08	1.9551e-07	-1.33655		Mpv17l	3.73832e-15	2.15288e-14	1.03295		Zfp322a	1.83072e-17	1.13136e-16	-3.37514		Meltf	0.0237321	0.029774	2.14848		Ip6k2	0.00147383	0.0024629	2.01717
Arid5b	3.95714e-08	1.99702e-07	1.69727		Slf1	3.77183e-15	2.17104e-14	2.15957		Ghdc	1.9187e-17	1.18426e-16	2.20585		Mthfr	0	0	8.44682		Ipw	0.00395695	0.00609071	2.09606
Dnajc2	3.99387e-08	2.01211e-07	1.90975		Mccc1	4.08273e-15	2.34288e-14	3.11899		Hsf1	2.00399e-17	1.23462e-16	3.71219		Mtmr14	0.00701089	0.0101593	2.61009		Iqce	7.04826e-12	7.04334e-11	2.0345
Ylpm1	4.01561e-08	2.01961e-07	-2.01853		Add2	4.36991e-15	2.50341e-14	-1.86782		Acyp1	2.30272e-17	1.41344e-16	-1.83371		Mtrf1l	0	0	4.72017		Iqgap2	0.0026761	0.00426926	2.33344
C1ql2	4.0535e-08	2.03694e-07	-1.63246		Zfp35	5.01729e-15	2.86676e-14	4.07249		Akt3	2.37676e-17	1.45531e-16	-1.78103		Mtrr	0.000125085	0.000251806	3.66342		Irf9	3.10955e-08	1.92618e-07	-3.57796
Glrx	4.06523e-08	2.04196e-07	-1.51822		Stmn1	5.25138e-15	2.99581e-14	-1.73239		Efna5	2.52581e-17	1.54468e-16	8.68484		Mvb12b	0.0162058	0.0212468	2.46709		Islr	0.00622386	0.00922482	3.75999
Tmem8b	4.07001e-08	2.04349e-07	1.1647		Bhlhe22	6.23121e-15	3.53999e-14	-2.11087		Lrch4	2.66051e-17	1.62408e-16	-6.89779		Mxd1	0.000435431	0.000810429	4.17751		Isyna1	0.0337057	0.0426414	2.36014
Prex2	4.1013e-08	2.05658e-07	-2.49622		Atp6v1g2	6.3565e-15	3.60741e-14	-1.48199		Vps4a	2.78793e-17	1.69875e-16	-4.7697		Mybbp1a	0.00554804	0.00827325	2.12918		Itch	5.21881e-06	1.74854e-05	5.44402
Kcnip3	4.28983e-08	2.14383e-07	1.24075		Stxbp6	6.38359e-15	3.6209e-14	-1.44143		Agap3	3.05257e-17	1.85887e-16	-1.13428		Mycn	0	0	4.42947		Itfg2	0.000667412	0.00117739	3.00172
Lmo7	4.35341e-08	2.17192e-07	1.91183		Slc4a8	6.43678e-15	3.64729e-14	-1.4799		Xpnpep1	3.24745e-17	1.97513e-16	-3.15301		Myo19	0	0	3.04808		Itga8	0.0309859	0.0395032	2.03465
Csrnp3	4.50804e-08	2.24243e-07	-1.05448		Fosb	6.50251e-15	3.6769e-14	2.07496		Nmrk1	3.31301e-17	2.01256e-16	2.1101		Myo9b	0.00146882	0.00251595	4.07048		Itgb1	0.0127632	0.017643	2.09179
Slc39a6	4.57111e-08	2.26902e-07	1.41506		Mrfap1	7.43705e-15	4.19665e-14	-1.95238		Inip	3.38585e-17	2.05556e-16	-4.93201		Myoz3	3.07789e-08	2.11847e-07	-2.02333		Itgb8	6.47742e-06	2.10299e-05	6.24237
Magohb	4.58744e-08	2.27616e-07	-1.65838		Serpinb6a	7.57284e-15	4.26886e-14	-2.85441		Dlgap3	3.4698e-17	2.10525e-16	2.93625		N4bp2l1	0.000175673	0.000344684	2.50051		Itih3	0	0	2.50341
Ppm1k	4.63672e-08	2.29772e-07	-1.48009		Zfp281	7.68561e-15	4.3302e-14	-2.25168		Prr11	3.50973e-17	2.12689e-16	2.7231		Ciao3	0.00522936	0.00787029	2.01002		Itm2a	0.00056638	0.00101081	-2.53478
Plec	4.77245e-08	2.35805e-07	-2.14595		Coa6	7.74649e-15	4.36224e-14	-2.72131		Mplkip	3.70602e-17	2.24449e-16	1.74605		Ice2	0.0420029	0.0496394	2.29494		Jag2	0	0	3.27268
Fut9	4.86256e-08	2.39849e-07	-1.05139		Syngr1	7.84641e-15	4.41624e-14	1.09498		Wdr41	3.72393e-17	2.25261e-16	-5.65689		Nbas	0.00336431	0.00530863	3.10724		Josd1	2.20932e-18	3.37487e-17	2.68776
Arsb	4.90965e-08	2.41673e-07	-1.75132		Fam81a	8.13726e-15	4.57522e-14	-1.99403		Vps53	4.1846e-17	2.52363e-16	-3.18558		Ndst2	0	0	2.61973		Jrk	6.28964e-05	0.000135553	-3.09992
Gpr22	4.91564e-08	2.41867e-07	1.36858		Shroom2	8.18044e-15	4.59713e-14	-6.68519		Cby1	4.25765e-17	2.56614e-16	-6.50566		Ndufaf6	0	0	9.05537		Kansl2	1.36402e-08	9.07659e-08	2.25852
Antkmt	4.94556e-08	2.43238e-07	-1.65371		Rsbn1	8.39259e-15	4.71393e-14	3.77049		Hnrnpa2b1	4.58072e-17	2.75753e-16	-1.62314		Neat1	2.41403e-15	3.55397e-14	4.71258		Kansl3	0.00441718	0.00675112	4.2489
Rab11fip2	4.95504e-08	2.43602e-07	-1.68785		Abhd13	8.88001e-15	4.98001e-14	1.82436		Lypd1	4.73641e-17	2.84954e-16	-4.29158		Nelfa	0.00139851	0.00240715	3.75894		Katna1	4.476e-12	4.54413e-11	4.23859
Tle5	4.96561e-08	2.4402e-07	-1.30733		Spry2	9.29579e-15	5.20516e-14	2.09079		Atp2b4	5.29687e-17	3.1829e-16	-1.76196		Nfil3	0.00755289	0.0108479	2.748		Katnbl1	9.51454e-06	2.87845e-05	2.49616
C1qtnf4	5.04489e-08	2.47093e-07	-1.39421		Kctd14	9.84153e-15	5.49947e-14	1.23125		Pcdh8	5.38071e-17	3.23133e-16	2.01449		Nfkb1	0.011235	0.0153807	3.58982		Kcnh1	2.83957e-07	1.39528e-06	2.96475
Eid1	5.16428e-08	2.52103e-07	-1.26749		Arhgef7	1.00517e-14	5.61119e-14	-1.15779		Sbf2	5.89913e-17	3.54054e-16	2.01461		Nfkbil1	1.50672e-07	8.62658e-07	2.3271		Kcnh2	6.37992e-11	5.81338e-10	3.03878
Slc26a10p	5.3335e-08	2.59505e-07	-3.0506		Ulk2	1.06611e-14	5.94832e-14	1.70255		D17h6s53e	5.91499e-17	3.54793e-16	1.81747		Nfkbiz	0	0	8.31727		Kcnj10	8.50519e-06	2.62642e-05	-2.72431
Brinp1	5.39978e-08	2.62297e-07	1.02957		Cmip	1.14396e-14	6.37615e-14	1.06453		Tomm40	6.73212e-17	4.02598e-16	-1.47883		Nfxl1	0	0	3.65262		Kcnj12	0.000193931	0.000368202	-2.15927
Esd	5.45682e-08	2.64959e-07	2.63902		Prox1	1.1549e-14	6.42731e-14	-2.9632		Synj2bp	7.10008e-17	4.2359e-16	1.45953		Nhlrc2	0	0	3.2304		Kcnj16	1.52618e-05	4.20065e-05	-3.51703
Akt1	5.4942e-08	2.66335e-07	-1.50986		Rab14	1.17138e-14	6.51238e-14	-1.27855		Unc5d	8.57926e-17	5.10012e-16	-2.25498		Ninj1	0	0	3.71388		Kcns1	0	0	2.74327
Spns1	5.5209e-08	2.6741e-07	1.4036		Rpl8	1.25367e-14	6.95217e-14	-1.73039		Sp140	1.03318e-16	6.12014e-16	6.25109		Nit2	0.037897	0.0452535	2.5851		Kctd12b	1.56707e-07	8.25029e-07	-4.69824
Trmt6	5.53722e-08	2.67871e-07	1.03672		Fdps	1.35432e-14	7.49892e-14	-5.82624		Tmem258	1.04976e-16	6.21463e-16	-3.31484		Nkd1	2.7506e-24	6.44599e-23	-2.93962		Kctd20	0.00947387	0.0134974	3.5191
Mllt10	5.63896e-08	2.71901e-07	-1.02766		Mat2b	1.44958e-14	8.01824e-14	-3.43845		Npdc1	1.18616e-16	7.00972e-16	-3.6981		Nmnat1	0.000614715	0.00112092	2.80558		Kctd3	0.00249477	0.004	3.66226
Cct8	5.77306e-08	2.77573e-07	1.23423		Ezr	1.5112e-14	8.32952e-14	2.85618		Gm17644	1.44027e-16	8.48633e-16	1.87281		Noc2l	1.69746e-08	1.23754e-07	4.91082		Kctd5	8.11978e-10	6.59237e-09	6.26968
Foxm1	5.93849e-08	2.84714e-07	-1.97806		Prmt8	1.57153e-14	8.65766e-14	-2.32072		Dusp28	1.47238e-16	8.66022e-16	-4.56471		Npas2	6.74505e-18	1.13655e-16	3.21336		Kdm2b	2.15806e-09	1.65601e-08	3.1665
Fuz	5.99144e-08	2.86903e-07	-3.78091		Rmi2	1.63641e-14	9.00678e-14	1.4304		Prkar2a	1.71157e-16	1.00257e-15	2.42427		Npas4	0.0322373	0.0391874	3.50437		Kdm3b	0.0106396	0.0149984	2.9586
Aplp2	6.0566e-08	2.89319e-07	-4.11701		Tmem208	1.63655e-14	9.00678e-14	1.59121		Rtf2	1.7826e-16	1.04357e-15	-3.34656		Nprl2	7.9773e-07	3.78444e-06	2.11128		Kif13a	0.0213057	0.028049	2.91688
Sipa1l2	6.06856e-08	2.8955e-07	-2.89318		Ndufb8	1.71436e-14	9.4113e-14	-1.30993		R3hdm2	1.9394e-16	1.13073e-15	-2.00435		Nprl3	0.00465351	0.00710327	2.72005		Kif13b	0	0	4.21894
Agap2	6.06879e-08	2.8955e-07	-1.65394		Zdhhc15	1.82833e-14	1.00068e-13	3.80348		Cnksr2	2.03414e-16	1.1839e-15	-1.04557		Nptxr	0	0	4.26255		Kif1c	0.00532723	0.00800759	3.98325
Mmd	6.2014e-08	2.9528e-07	-1.29548		Mrpl33	1.84223e-14	1.00778e-13	-2.26868		Cox7a2l	2.20841e-16	1.28309e-15	-1.84924		Nr1h2	0.0171328	0.0222909	2.83595		Klc4	0.0125888	0.0174335	2.32355
Ak5	6.21648e-08	2.95879e-07	-1.42569		Rhob	1.94895e-14	1.0635e-13	-1.1428		Adgrb3	2.34648e-16	1.36251e-15	-2.4441		Nr2c1	0	0	5.13647		Klf10	1.31488e-05	3.73004e-05	-2.76044
Usp42	6.46179e-08	3.05827e-07	1.13576		Csnk2b	2.01369e-14	1.09718e-13	-1.57394		Snx2	2.38665e-16	1.38503e-15	-4.65782		Nr2e1	1.93645e-05	5.33826e-05	-4.1162		Klf15	0	0	6.72364
Lysmd3	6.46923e-08	3.06056e-07	-2.1122		Adck5	2.15735e-14	1.17136e-13	2.53648		Gm3002	2.3978e-16	1.3907e-15	8.43346		Nr4a3	0	0	5.62937		Klf4	0	0	2.41311
Ppil4	6.59744e-08	3.11248e-07	1.58852		Nkx2-1	2.18518e-14	1.18471e-13	1.89447		Stxbp5l	2.4021e-16	1.39238e-15	2.33399		Nsmaf	0.0127248	0.0171591	2.6379		Klhl17	1.5075e-22	2.8491e-21	2.47104
Shisa7	6.77466e-08	3.18536e-07	-2.05141		Pcp4	2.39762e-14	1.29602e-13	-1.51893		Tnfrsf10b	2.44076e-16	1.41316e-15	1.78694		Nsmce4a	0.0200101	0.025568	2.95812		Klhl23	0.00950473	0.0135293	2.5821
Lcmt2	6.8291e-08	3.20511e-07	1.14421		Smarcc2	2.40384e-14	1.29874e-13	-1.38755		Tbc1d24	2.55214e-16	1.47593e-15	-1.2323		Nsun4	1.34197e-05	3.97391e-05	-3.31449		Klhl34	1.23342e-25	2.85278e-24	5.94263
Camkk2	6.83523e-08	3.20544e-07	-1.39915		Supt16	2.44749e-14	1.32167e-13	1.96543		Coro1a	2.60093e-16	1.50188e-15	-1.5236		Ntf3	5.98766e-36	3.30281e-34	2.42837		Klhl40	0.00159381	0.0026426	-3.71669
Psma5	6.89581e-08	3.22767e-07	1.12455		Bc056474	2.50972e-14	1.35461e-13	-2.95433		F10	2.69443e-16	1.55462e-15	2.35459		Ntm	8.94558e-07	4.16274e-06	-2.61676		Kpna6	0.01808	0.0241403	2.16813
Cntnap1	6.8963e-08	3.22767e-07	-2.11723		Slit1	2.57528e-14	1.38862e-13	3.1611		Spryd3	2.76568e-16	1.59481e-15	-2.81066		Numb	0.0116368	0.015862	2.92222		Kri1	0	0	8.42581
Psmd3	7.00354e-08	3.27137e-07	1.40543		Sem1	2.59353e-14	1.39777e-13	-2.053		Ndufv1	2.90032e-16	1.67052e-15	1.15017		Nup107	0	0	5.27605		Krit1	1.82478e-11	1.75178e-10	3.29772
Mcf2l	7.08539e-08	3.29505e-07	-2.25696		Tyk2	3.07264e-14	1.64866e-13	1.98391		Prmt3	2.90672e-16	1.67325e-15	6.35634		Nup214	0.00193389	0.00323393	2.11554		Krr1	0.00233417	0.00376355	2.1896
Nrxn2	7.10622e-08	3.30104e-07	1.0719		Golm2	3.25031e-14	1.74228e-13	1.66766		Ndufs7	3.0325e-16	1.74365e-15	-1.45119		Nup85	0.00340095	0.00535777	2.35231		Krt12	0	0	2.24644
Fam120c	7.16912e-08	3.32632e-07	1.01583		Ece2	3.52412e-14	1.88534e-13	2.83051		Pcdha6	3.95362e-16	2.26157e-15	2.21393		Nup88	0.000348977	0.000657791	2.30822		Krt2	0.0322297	0.0409457	2.57746
Rce1	7.18842e-08	3.33387e-07	1.38205		Tars1	4.10002e-14	2.18701e-13	1.83515		Acsbg1	4.06139e-16	2.32189e-15	2.54033		Nxt2	0.000681905	0.0012344	4.79347		Cnksr2	3.96591e-18	5.97856e-17	7.54567
Tef	7.30033e-08	3.37923e-07	-1.56581		Angpt2	4.18609e-14	2.23074e-13	5.49908		Aldh6a1	4.0822e-16	2.33245e-15	4.05061		Nyap2	0	0	6.56877		Lamp5	1.53592e-05	4.2224e-05	4.54352
Rnf182	7.48311e-08	3.4557e-07	-1.38775		Cadm3	4.70908e-14	2.5009e-13	1.68722		Gm10845	4.32852e-16	2.47178e-15	1.76467		Nyx	2.82224e-23	6.31037e-22	2.26365		Larp1b	0	0	2.01309
Dcaf17	7.67098e-08	3.53003e-07	-1.21883		Rhoq	4.76712e-14	2.53049e-13	5.55529		Trappc1	4.34295e-16	2.4786e-15	-2.93185		Ocln	0.0311358	0.0379659	3.68147		Larp6	0.00016989	0.000325372	3.37864
Mysm1	7.78142e-08	3.57666e-07	1.2946		Ddx54	4.7868e-14	2.5397e-13	1.40366		Homer2	4.59494e-16	2.61794e-15	6.6956		Odf2l	0.00666887	0.00972392	3.11672		Las1l	1.50806e-05	4.16478e-05	4.60935
Kcnk1	8.18347e-08	3.73383e-07	1.78723		Aff1	4.79504e-14	2.54284e-13	2.78298		Fxyd2	4.78946e-16	2.72721e-15	1.20201		Olfm4	0	0	2.14602		Lbr	0.0111836	0.0156748	3.59624
Prkag2	8.2405e-08	3.75839e-07	-1.84922		Slc35e3	5.07644e-14	2.68815e-13	2.70739		Gmeb1	5.09088e-16	2.8939e-15	1.83289		Olfr53	0.00567509	0.00843045	6.95658		Lcor	5.84977e-06	1.92068e-05	5.95977
Nat8l	8.37182e-08	3.81681e-07	-1.6102		Dst	5.22815e-14	2.76714e-13	1.29968		Ddx18	5.22098e-16	2.9628e-15	2.86917		Ophn1	0.00319431	0.00507256	2.93293		Ldb2	3.11208e-06	1.13159e-05	-4.78267
Mfsd11	8.42145e-08	3.83796e-07	1.13439		Slc45a1	5.27607e-14	2.7898e-13	4.19798		Tbx18	5.5647e-16	3.15607e-15	2.82802		Orc5	0.00135955	0.00234319	4.11798		Lef1	1.93326e-05	5.11613e-05	-4.75938
Agap1	8.42776e-08	3.83935e-07	-1.03936		Rhog	5.56789e-14	2.93699e-13	1.67503		Rbbp4	5.73493e-16	3.25077e-15	-1.43422		Osgin2	0.000193772	0.000377033	3.26559		Leng9	0	0	5.16003
Hcrtr1	8.7796e-08	3.9766e-07	-1.07238		Ank3	5.64793e-14	2.97778e-13	1.19632		Snx25	6.07935e-16	3.4382e-15	5.74214		Otof	0	0	3.34764		Lgalsl	0.00185751	0.00304986	2.90134
Atp6v1g2	8.89449e-08	4.02401e-07	-1.29911		Rpn1	6.20536e-14	3.26222e-13	1.95816		Ergic3	6.09329e-16	3.44414e-15	-4.0094		Ovgp1	0.000103624	0.000212742	4.56907		Lgr5	8.71873e-06	2.6801e-05	-3.47616
Mmd2	8.91543e-08	4.03194e-07	-1.62501		Grk4	6.31677e-14	3.3176e-13	1.95519		Egln2	6.36185e-16	3.58985e-15	-5.04723		Oxa1l	0.0150892	0.0199608	2.49203		Lhx6	0.0126141	0.0174643	-3.03316
Fan1	9.00072e-08	4.06695e-07	1.11958		Gm15800	7.90487e-14	4.12785e-13	1.22029		Hmmr	6.36683e-16	3.59063e-15	3.43064		P2rx4	1.44519e-08	1.07644e-07	7.58418		Limch1	0.000131217	0.00025732	2.1699
Timp2	9.33663e-08	4.19828e-07	-1.62372		Btg1	7.9667e-14	4.15616e-13	-1.83623		Cd200	6.51289e-16	3.66887e-15	2.9944		P2ry14	0.0245289	0.0306539	4.82509		Lins1	0.00336436	0.00526116	4.50463
Astn1	9.54562e-08	4.27921e-07	-1.39237		Usp34	8.21601e-14	4.28008e-13	1.63475		Frmd5	7.01027e-16	3.94017e-15	1.06218		P4ha2	1.72376e-15	2.55808e-14	6.84953		Llgl1	0.00279461	0.00444103	2.87495
Cck	9.56974e-08	4.28839e-07	-2.06924		Cntn5	8.84515e-14	4.59905e-13	3.11412		Cr1l	8.80761e-16	4.91173e-15	3.34003		Pafah1b3	0	0	5.84045		Lmbr1	0.000340696	0.000626959	5.89984
Elk1	1.01256e-07	4.49652e-07	-1.2337		Coq2	9.69528e-14	5.0315e-13	-1.75441		Hmgn2	9.05827e-16	5.0487e-15	-2.8094		Pak4	0.0216942	0.0274529	2.31829		Lmnb2	1.74477e-09	1.35243e-08	4.77683
Pde1b	1.02025e-07	4.52722e-07	-1.4121		Loxl2	9.70336e-14	5.0333e-13	1.94055		Sgip1	9.12784e-16	5.08181e-15	1.42935		Pak5	0.00700552	0.010154	2.8425		Lpar1	0.00108311	0.00185537	-5.23382
Wnt2b	1.02428e-07	4.54339e-07	-3.37696		Pde4c	1.01154e-13	5.24207e-13	1.63349		Gorasp2	9.22311e-16	5.12914e-15	-5.26521		Palm	0.00514032	0.00775325	2.18054		Lpin1	0.0133071	0.0183045	3.06224
Glo1	1.05864e-07	4.68e-07	-1.2208		Il5	1.02812e-13	5.32292e-13	1.43907		Rcan2	9.99987e-16	5.55493e-15	-1.41334		Palmd	1.99752e-05	5.47947e-05	4.58581		Lrch3	0	0	8.00687
Sass6	1.06855e-07	4.72028e-07	-1.2529		Crebzf	1.07701e-13	5.57074e-13	1.76275		Ccdc32	1.08622e-15	6.02056e-15	-2.57248		Tent2	0.00921193	0.012915	2.91852		Lrfn1	0	0	3.4144
Sec14l1	1.08311e-07	4.77563e-07	-2.04632		Aqp11	1.08434e-13	5.60604e-13	1.54361		Cep83	1.34749e-15	7.43572e-15	5.80735		Papolg	0.0264389	0.0327898	4.5192		Lrfn5	0.000535014	0.000959162	3.91806
Asns	1.1073e-07	4.87491e-07	1.50806		Ptk2b	1.1822e-13	6.08603e-13	-1.67905		Kctd2	1.61719e-15	8.89457e-15	5.61463		Parg	0.00401721	0.00623454	2.74125		Lrp10	0	0	9.02029
Cpsf2	1.12278e-07	4.93214e-07	1.96277		Prps1	1.19895e-13	6.16642e-13	-1.44715		Pbdc1	1.93117e-15	1.05691e-14	-3.192		Parp16	0	0	8.08869		Lrp12	4.70837e-06	1.60232e-05	2.46109
Bhlhe41	1.2002e-07	5.2468e-07	1.73667		Zfp277	1.2533e-13	6.43686e-13	1.29485		Fundc2	2.09768e-15	1.14491e-14	2.50465		Parp8	0.0363255	0.0435638	3.41227		Lrrc1	3.39937e-06	1.21982e-05	6.85413
Kifc2	1.21077e-07	5.29105e-07	-1.12212		Btn3a3	1.27175e-13	6.52856e-13	-2.80481		Anapc13	2.20297e-15	1.1991e-14	-2.14319		Parvg	0.00535345	0.00803121	3.856		Lrrc17	2.99576e-10	2.53073e-09	-3.39858
Map4k3	1.24381e-07	5.4214e-07	-3.13077		Gm13497	1.31367e-13	6.74058e-13	5.884		Tor1b	2.24615e-15	1.22127e-14	-5.19193		Paxbp1	0.000611163	0.00111497	3.58528		Lrrc24	2.50112e-06	9.35536e-06	3.29571
Psrc1	1.24682e-07	5.4305e-07	-2.96584		Ppp4r2	1.31524e-13	6.74547e-13	1.34587		Slc50a1	2.35673e-15	1.27931e-14	-3.09239		Pbx4	0	0	7.1736		Lrrc61	0	0	2.65897
Cltb	1.27638e-07	5.54289e-07	1.33995		Etfb	1.3228e-13	6.7779e-13	-2.67335		Denr	2.44086e-15	1.32354e-14	-2.13609		Pcca	0.0240485	0.0301321	2.74647		Lrrc7	0.000136668	0.000266869	2.73066
Ldha	1.30094e-07	5.63711e-07	-1.30577		Tomm20	1.40033e-13	7.17175e-13	-1.29404		Akap2	2.45737e-15	1.33178e-14	3.45294		Pcdhb13	0.00214834	0.00355493	-2.46951		Lrrc8d	0.00177569	0.00292473	2.95143
Nkain2	1.38718e-07	5.97785e-07	-1.2966		Gm19757	1.59812e-13	8.15034e-13	1.23971		Itih5	2.53938e-15	1.37399e-14	7.51942		Pcdhb20	4.4061e-06	1.6213e-05	5.83412		Lrrfip2	0.000697487	0.00122724	4.51295
Sars1	1.38864e-07	5.98195e-07	1.27278		Slc29a3	1.68357e-13	8.56614e-13	1.47404		Zfp423	2.63244e-15	1.42203e-14	2.48068		Pcdhga3	4.23278e-11	4.55784e-10	-2.56884		Lrriq1	0	0	7.45058
Ercc6l2	1.46956e-07	6.2915e-07	-1.83669		Samd8	1.81241e-13	9.20453e-13	1.11278		Plxna4	2.93355e-15	1.58298e-14	-2.20679		Pcdhgb1	0.000168259	0.000331081	4.20817		Lrwd1	0	0	4.50463
Hspe1	1.48329e-07	6.33646e-07	1.14401		Laptm5	1.85172e-13	9.3998e-13	3.67269		Ets2	3.00707e-15	1.62177e-14	-1.23341		Pced1a	0.00448632	0.00687108	2.72194		Lsm14a	0.0209018	0.0275806	3.44338
Paip2	1.49532e-07	6.38322e-07	-1.11945		Cttn	1.86522e-13	9.46389e-13	-1.88279		Hdac1	3.24504e-15	1.74541e-14	-2.65646		Pcgf6	0.00868344	0.0122572	2.01257		Ltn1	2.09172e-17	3.01459e-16	2.66604
Mal2	1.50958e-07	6.43479e-07	-1.12549		Mtus1	1.87019e-13	9.4847e-13	1.67005		Akr1e1	3.2972e-15	1.77251e-14	3.013		Pcnx2	0.0122979	0.0166488	2.12447		Lurap1l	2.20274e-10	1.89004e-09	2.92455
Lrrc17	1.51908e-07	6.47297e-07	2.28836		Thoc2	1.88526e-13	9.55672e-13	-2.0331		Rilpl1	3.46148e-15	1.85883e-14	-2.74823		Pcsk5	0.00305182	0.00487474	3.00898		Lyar	0	0	2.18291
Fam3c	1.5512e-07	6.6003e-07	-1.06794		Ppp1cb	1.93713e-13	9.81055e-13	-1.58241		Dcaf5	3.46352e-15	1.85892e-14	1.41661		Pcsk7	0.00261075	0.00423558	2.32764		Lypla2	0.0323003	0.0410263	2.5553
Skil	1.55755e-07	6.62254e-07	-2.57081		Spc24	1.9687e-13	9.96117e-13	2.52236		Camkk1	3.56907e-15	1.91352e-14	-1.33332		Pdcd2l	0.00302674	0.00483865	2.63948		Lyrm1	8.38326e-07	3.62642e-06	-3.90157
Ktn1	1.55985e-07	6.62516e-07	1.12978		Sumo1	2.27633e-13	1.14911e-12	-1.20199		Rab3a	4.15893e-15	2.2238e-14	-1.67585		Pdk4	1.63992e-07	9.31509e-07	-2.50387		Lyrm7	0.0244642	0.0318201	2.98677
Itpka	1.56346e-07	6.6381e-07	-2.32656		Crocc	2.44117e-13	1.22835e-12	2.77489		Epas1	4.36078e-15	2.32924e-14	-1.20334		Pdxk-ps	1.3023e-05	3.88199e-05	-2.21698		Lzts1	0	0	2.01323
Zw10	1.57585e-07	6.68349e-07	1.45783		Ywhaq	2.75158e-13	1.37945e-12	-1.27555		Nedd4l	4.39677e-15	2.34721e-14	-2.35378		Pdyn	0.0262505	0.0325771	2.5788		Mad2l2	3.56249e-33	1.53642e-31	6.29857
Itgav	1.65095e-07	6.95452e-07	1.65797		Ifnar1	2.76573e-13	1.38591e-12	1.85496		Zmiz1	4.40219e-15	2.34886e-14	2.03267		Pelo	0.000512016	0.000944999	-2.58295		Maea	0.000538341	0.000964519	2.98942
Mir5109	1.7531e-07	7.33504e-07	1.38854		Aldh9a1	2.84997e-13	1.42681e-12	1.95596		Alx4	4.41756e-15	2.35579e-14	2.37469		Pex26	0.0290279	0.0356306	2.25		Maf	0.00229975	0.00371432	-2.57893
Bicd1	1.76402e-07	7.37029e-07	1.22644		Slc35e2a	2.87961e-13	1.44033e-12	1.19937		Necap1	4.86447e-15	2.5886e-14	-2.13648		Pgam2	1.51742e-05	4.38358e-05	2.24711		Mafg	1.68022e-05	4.55471e-05	2.04415
Selenom	1.79288e-07	7.48556e-07	-1.35914		Rcn2	2.92953e-13	1.46329e-12	-1.16677		Tecpr1	5.77816e-15	3.06016e-14	5.03777		Pgap3	0.0289492	0.0355526	4.44019		Mafk	0	0	3.90511
Cdk14	1.82087e-07	7.58095e-07	-1.55755		Nek9	3.65465e-13	1.8114e-12	7.90004		Fastkd5	6.46216e-15	3.41518e-14	4.02557		Phactr4	0.0071028	0.0102772	2.17449		Maml1	0	0	3.53496
Nufip2	1.85117e-07	7.6881e-07	1.21179		Psmc4	3.7003e-13	1.8307e-12	1.29003		Ralgapa1	6.69634e-15	3.53707e-14	-3.05539		Phlda3	1.18035e-06	5.29662e-06	-3.12352		Maml3	7.02241e-05	0.000148801	4.19606
Hrk	1.8838e-07	7.79347e-07	-2.74375		Zxda	3.70408e-13	1.83174e-12	1.66387		Tmem38b	6.81601e-15	3.59838e-14	1.20501		Pias3	0	0	3.80908		Man1b1	3.85268e-05	9.03105e-05	2.19928
Cpne4	1.89191e-07	7.82152e-07	-1.60334		Ptprz1	3.98227e-13	1.96398e-12	1.26036		Foxn3	7.26054e-15	3.82498e-14	2.94752		Pid1	0.00523931	0.00788223	-2.87378		Man2b1	2.59116e-09	1.96469e-08	2.03187
Rps6ka6	1.92678e-07	7.95178e-07	5.74861		Ptprn	4.00536e-13	1.97447e-12	1.76594		Sptbn4	7.31427e-15	3.84923e-14	-2.59278		Pigb	0.0398993	0.0473976	3.12426		Man2c1	0.000415219	0.000756454	3.61274
Emc1	1.94873e-07	8.0339e-07	1.72723		Sgk1	4.03867e-13	1.98999e-12	7.17816		Nars1	8.08444e-15	4.24338e-14	1.77553		Pigh	4.15023e-10	4.03767e-09	5.44609		Maneal	0.017006	0.0228312	2.45611
Dusp8	1.97107e-07	8.11185e-07	-1.09795		Map3k11	4.47868e-13	2.20183e-12	1.25113		Slc41a1	8.1741e-15	4.28594e-14	3.76382		Pign	0.0129613	0.0174519	2.28177		Map2k3	0	0	3.04401
Psmd6	1.97251e-07	8.11493e-07	1.35533		Pacc1	4.69176e-13	2.30451e-12	1.10009		Pcdh11x	8.24627e-15	4.32151e-14	7.15785		Pigt	0.00639614	0.00936947	2.80241		Map2k5	0.0216642	0.028485	2.58721
Cacybp	2.03351e-07	8.33972e-07	1.30076		Pusl1	5.17897e-13	2.53584e-12	1.33289		Dcdc2c	8.53935e-15	4.47041e-14	2.69731		Pisd-ps1	0.0180743	0.0233832	2.56802		Map3k10	0.0256439	0.0332452	3.03183
Slc10a7	2.06421e-07	8.44215e-07	1.65608		Asap2	5.28713e-13	2.58764e-12	4.81194		Slc38a6	9.44087e-15	4.9372e-14	2.66833		Pkd1	0.00219194	0.00361583	2.53943		Map3k11	0.000672038	0.001185	3.9839
Plpbp	2.07298e-07	8.47214e-07	2.10544		Snx3	5.38885e-13	2.63624e-12	-1.53278		Get3	9.51586e-15	4.97122e-14	-4.0855		Pkdcc	0	0	3.85733		Map3k12	0.0108158	0.0152169	2.19753
Actl6b	2.11436e-07	8.63228e-07	-1.77088		Dnaaf10	5.53554e-13	2.70437e-12	1.36172		Dlgap3	1.0069e-14	5.25196e-14	-1.19624		Plagl1	1.46195e-22	3.13115e-21	4.14702		Map3k9	9.76606e-05	0.000197525	-3.09221
Cacna1a	2.1393e-07	8.72506e-07	-1.94042		Epas1	5.60753e-13	2.73587e-12	6.55216		Synm	1.01708e-14	5.30227e-14	6.38906		Plat	0.0166013	0.0217105	2.92939		Map4k3	0.0045196	0.00689571	3.03245
Sowaha	2.18771e-07	8.8979e-07	-2.22979		Dus2	5.68491e-13	2.7699e-12	1.96469		Epb4.1l3	1.08343e-14	5.63352e-14	2.99639		Plcg2	0.000132078	0.000264608	-2.90115		Map4k5	0.005349	0.00803716	2.17004
Rala	2.19275e-07	8.91532e-07	1.54273		Eid1	6.05764e-13	2.94625e-12	-1.52894		Lap3	1.11439e-14	5.79149e-14	1.46818		Plcl2	0.00801174	0.0114213	2.22816		Mapkapk2	4.42112e-18	6.63862e-17	4.95611
Tmtc1	2.19984e-07	8.94106e-07	1.48815		Lime1	6.6267e-13	3.21158e-12	3.52976		Psme4	1.44589e-14	7.47541e-14	4.94891		Plcxd3	0.020396	0.0260099	-2.47308		Mapkapk5	0	0	4.89994
Sncb	2.24003e-07	9.07939e-07	-1.85515		Cox5b	7.41103e-13	3.57899e-12	-1.52963		Slain1	1.52584e-14	7.87657e-14	-4.15865		Pld2	0	0	5.21963		Mars1	0.0196463	0.0260287	2.58556
Pld3	2.24817e-07	9.10612e-07	1.06735		Insl3	7.96324e-13	3.84058e-12	3.06896		Slc35e2a	1.61004e-14	8.29405e-14	1.24791		Pld5	0.000479642	0.000887911	-2.8327		Mast4	0.00390525	0.00601679	2.05927
Tmem223	2.26724e-07	9.17078e-07	-1.27437		Rps3	8.33965e-13	4.01679e-12	-2.89943		Gm5531	1.62214e-14	8.35212e-14	4.95472		Plek	0.0229996	0.0289575	2.47372		Matn2	0.0155604	0.0210854	2.20422
Smc2	2.27542e-07	9.19825e-07	-1.06199		Adam28	8.61241e-13	4.14268e-12	1.93627		Eml2	1.78632e-14	9.17855e-14	2.33222		Plekha8	5.5398e-12	6.3951e-11	2.88971		Mbd1	0.00724947	0.0105849	2.00154
Atf7	2.35481e-07	9.48597e-07	-1.37055		Gm15645	8.84462e-13	4.24876e-12	2.32337		D5ertd579e	1.93841e-14	9.93957e-14	-1.3674		Plin4	0	0	7.91785		Mboat2	1.65727e-10	1.4502e-09	2.9635
Ogdhl	2.41381e-07	9.70048e-07	1.80101		Mrpl12	9.7555e-13	4.67399e-12	-1.72188		Ctdsp2	1.98791e-14	1.01881e-13	-3.98394		Kiz	0.0124971	0.0168832	2.98425		Mccc1	0.00107888	0.00184896	4.25901
Ogn	2.48717e-07	9.95795e-07	-4.67384		Mc1r	9.9173e-13	4.74111e-12	1.56271		Miga1	2.04906e-14	1.04908e-13	-2.04682		Plp1	3.43373e-07	1.80527e-06	-3.1272		Mcm7	0.000208524	0.000393646	5.61635
Gabra5	2.51657e-07	1.00586e-06	-1.28603		Arid4a	1.00131e-12	4.78482e-12	2.13738		Ckmt1a	2.50197e-14	1.27834e-13	-2.13099		Plscr4	0	0	4.56558		Mcm3ap	5.78559e-05	0.000126255	3.13396
Lin7b	2.54235e-07	1.01548e-06	-2.20975		Prdx2	1.02424e-12	4.89227e-12	-1.43515		Mlec	2.5103e-14	1.28194e-13	8.81996		Pml	2.12563e-32	8.42615e-31	3.60871		Mcm4	0.00950539	0.0135293	2.87589
Atp5mc2	2.62956e-07	1.04395e-06	-1.08973		Grik5	1.07064e-12	5.10048e-12	2.20681		Rabggtb	3.10163e-14	1.57828e-13	3.67262		Pmm2	0.0104594	0.0144322	3.43644		Mcmbp	0.000111891	0.000223314	2.23909
Rtn4rl1	2.64313e-07	1.04757e-06	1.64178		Tbcb	1.12157e-12	5.32919e-12	-2.29653		Zfp300	3.15608e-14	1.60436e-13	1.16812		Pms2	0.00309966	0.00494374	3.82743		Mcph1	0.0161966	0.0218648	2.21582
Nifk	2.65913e-07	1.0525e-06	1.30729		Gng3	1.16717e-12	5.53861e-12	-1.18157		Eef1g	3.18111e-14	1.61544e-13	-1.85698		Pnpla2	2.954e-12	3.48227e-11	7.55908		Mea1	1.62359e-06	6.4249e-06	3.5184
Psmd11	2.66291e-07	1.05365e-06	1.24156		Kctd13	1.1757e-12	5.57425e-12	-2.13596		Pola2	3.20212e-14	1.62528e-13	2.17103		Poc1a	7.6567e-34	3.47045e-32	2.44664		Med11	0	0	2.90661
Pfkm	2.67132e-07	1.05662e-06	-1.33081		Dnm3	1.19824e-12	5.67616e-12	1.37011		Ctnnb1	3.37791e-14	1.71363e-13	-1.83731		Poc1b	0	0	3.13089		Med15	4.67843e-06	1.59592e-05	2.57048
Eea1	2.74742e-07	1.08272e-06	1.93232		Zup1	1.25428e-12	5.9288e-12	1.12558		Rn45s	3.54678e-14	1.79475e-13	1.21426		Pomzp3	0.0016349	0.00277361	2.16797		Med9	1.27286e-11	1.24593e-10	2.3892
Cars1	2.83062e-07	1.11106e-06	1.13188		Phactr1	1.28423e-12	6.06773e-12	-2.18751		Gas7	3.71465e-14	1.87779e-13	-2.48421		Plpp1	8.19135e-32	3.12018e-30	2.29915		Med27	6.65083e-17	9.24828e-16	4.02582
Bcl11a	2.87594e-07	1.12585e-06	-2.09138		Cnnm4	1.31291e-12	6.20056e-12	3.21325		Ramac	3.77718e-14	1.90844e-13	-1.09681		Plpp5	0.0128874	0.0173604	3.22176		Med8	0.00186074	0.00305473	3.97453
Dtymk	2.90166e-07	1.13554e-06	-1.67198		Cstf3	1.34956e-12	6.36811e-12	1.9425		Abcd2	3.85211e-14	1.94335e-13	3.49753		Coasy	0.0263214	0.0326511	2.04089		Medag	0.00154355	0.00256966	-2.40726
Tppp	2.96671e-07	1.15755e-06	-1.94906		Atp5mf	1.37418e-12	6.47871e-12	-1.62221		Tapbp	4.01046e-14	2.02018e-13	2.29698		Ppfibp1	0	0	5.64845		Meis2	2.52196e-06	9.42407e-06	-2.8869
Mrps33	2.97343e-07	1.15978e-06	-1.64512		Iws1	1.40263e-12	6.60427e-12	2.28859		Mapk8ip2	4.368e-14	2.19696e-13	-2.01942		Ppil3	3.0082e-16	4.65317e-15	2.14519		Mest	3.49235e-12	3.58036e-11	4.23507
Ndrg3	3.02503e-07	1.17518e-06	-1.57916		Ubn2	1.43821e-12	6.76419e-12	1.00371		Fam21	4.5999e-14	2.31244e-13	-2.57656		Ppp1r15b	0.000123381	0.000248676	-3.31739		Metap1d	1.27699e-10	1.13037e-09	3.62918
Ago2	3.02586e-07	1.17518e-06	1.0938		Bptf	1.62824e-12	7.64019e-12	1.84103		Irs2	4.62748e-14	2.32513e-13	1.71271		Ppp1r16a	0.00248374	0.00405655	4.22978		Mettl13	1.38151e-18	2.1302e-17	6.76476
Dusp7	3.03127e-07	1.1769e-06	-1.16955		Abcg1	1.72459e-12	8.07151e-12	-2.29784		St13	4.63599e-14	2.32824e-13	-1.56527		Ppp4r1	0	0	3.12816		Mettl17	0.00609698	0.00905197	3.44197
Rbm6	3.08964e-07	1.19681e-06	1.74705		Zfp748	1.80352e-12	8.43367e-12	2.78781		Pnkp	5.56599e-14	2.7855e-13	2.5765		Ppp6c	4.38311e-08	2.89746e-07	5.50387		Mettl25	0.0228984	0.0299601	2.04692
Dtd1	3.10239e-07	1.20135e-06	-1.08914		Cwf19l2	1.81491e-12	8.47966e-12	2.92325		Krcc1	5.99672e-14	2.99956e-13	-4.81461		Pprc1	0.0068627	0.00997048	2.29226		Mex3d	0.013662	0.0187432	4.15355
Lta4h	3.11751e-07	1.20602e-06	1.40481		Nbl1	1.896e-12	8.84342e-12	1.51058		Sac3d1	6.66862e-14	3.324e-13	1.3062		Slc66a1	4.63833e-08	3.05017e-07	2.13509		Mfap3	0.000147255	0.00028526	2.38413
Mgrn1	3.20114e-07	1.23271e-06	-1.44909		Chpt1	1.96948e-12	9.17831e-12	1.64041		Fnta	6.78292e-14	3.37929e-13	-2.65737		Slc66a3	0.012557	0.0169582	6.3393		Mfap4	0	0	6.3699
Fcer1g	3.20535e-07	1.23393e-06	1.86553		Gtf2ird1	2.07836e-12	9.66922e-12	2.86176		Wnt7b	7.10046e-14	3.53573e-13	1.63939		Prcc	0.0331568	0.0401632	2.62982		Mfsd1	0	0	5.01553
Plxna2	3.25589e-07	1.25134e-06	1.05508		Ubc	2.18038e-12	1.01309e-11	1.22277		Trim28	7.32992e-14	3.64817e-13	-2.69319		Prcp	0.0033956	0.00535078	4.2942		Mfsd8	1.49184e-10	1.30844e-09	4.41317
Limd2	3.28303e-07	1.26096e-06	-1.46584		Actr3	2.29703e-12	1.06547e-11	-2.36114		Otub1	7.55519e-14	3.75843e-13	-2.51716		Prdm4	3.10872e-40	3.90897e-38	7.97545		Mgat4a	0.0171855	0.0230479	2.09738
Snhg11	3.31145e-07	1.27104e-06	1.52191		Snhg1	2.39265e-12	1.10795e-11	3.39971		Pak4	7.84082e-14	3.8947e-13	3.36538		Prdx4	0.00547472	0.00817956	2.93679		Mgat4c	0.00258774	0.00413462	-2.95748
Syt13	3.32218e-07	1.27392e-06	-1.50032		Gmps	2.42467e-12	1.12134e-11	-2.4065		Txnl1	7.88164e-14	3.91303e-13	-2.62123		Prkab1	9.17169e-09	7.0417e-08	2.55057		Mgp	8.73285e-21	1.4864e-19	-8.65372
Acadvl	3.32437e-07	1.27425e-06	1.96507		Ccpg1	2.68888e-12	1.24039e-11	-1.23114		Sybu	8.03126e-14	3.98139e-13	-3.14599		Prkcd	1.50651e-06	6.56615e-06	-5.15321		Micall1	0.0272565	0.0351451	2.60248
Txnl1	3.3263e-07	1.27425e-06	1.45686		Rai2	2.70737e-12	1.24839e-11	1.30372		Slc25a16	8.18018e-14	4.0532e-13	-1.58658		Prkrip1	2.158e-29	6.71162e-28	2.13847		Mier2	0.0154205	0.0209107	2.03953
Gm3893	3.36283e-07	1.28741e-06	-2.57927		Zfp71-rs1	2.72628e-12	1.25658e-11	1.78143		Smap1	8.46554e-14	4.19044e-13	1.72105		Prkx	0.0242617	0.0303472	2.5939		Mier3	0.00120319	0.00204671	4.0722
Ptpn18	3.40727e-07	1.30316e-06	1.82158		Sel1l	2.85007e-12	1.31197e-11	1.57307		Mfsd5	8.54031e-14	4.22327e-13	-2.59872		Prmt6	0	0	4.87083		Riox2	1.4013e-45	1.23659e-42	7.96783
Nlgn3	3.416e-07	1.30607e-06	-1.40281		Kcnk1	3.12395e-12	1.43502e-11	1.67696		Tfcp2	8.57455e-14	4.23811e-13	2.15914		Prr18	0.0161956	0.0212398	-2.52819		Minpp1	0.0243413	0.0316818	2.82776
Inhba	3.42175e-07	1.30785e-06	4.704		Dennd5b	3.18365e-12	1.46121e-11	1.58787		Crym	9.16644e-14	4.52172e-13	-4.36465		Prr3	0.0234919	0.0295011	2.24168		Mios	0.0118154	0.0164658	2.07557
Ai414108	3.44679e-07	1.31529e-06	6.30633		Fech	3.34167e-12	1.53245e-11	-2.2951		Wasl	9.36547e-14	4.61762e-13	-1.31476		Prrc1	0.000771765	0.00138548	2.25905		Mir1931	0	0	3.64036
Wdr77	3.46902e-07	1.32292e-06	1.36462		Cd274	3.68186e-12	1.6828e-11	1.40747		Rpl11	1.00793e-13	4.96468e-13	-1.92174		Pskh1	0	0	2.72447		Mir5109	6.35707e-09	4.52409e-08	-2.03857
Ldhb	3.48001e-07	1.32668e-06	-1.04414		Copb1	3.77724e-12	1.72479e-11	1.99227		Mt2a	1.01002e-13	4.97253e-13	3.09666		Psmg3	0.00719043	0.0103937	2.06267		Mitd1	1.12344e-07	6.11681e-07	7.13259
Kcnq3	3.5607e-07	1.35394e-06	-6.49787		Mrps7	3.79156e-12	1.73005e-11	-1.34942		Reep5	1.06535e-13	5.2346e-13	-2.93087		Pstk	0.0278774	0.0343554	2.80389		Mki67	2.7918e-15	3.53895e-14	2.52222
Macrod1	3.58431e-07	1.36116e-06	-3.45653		Fnbp4	4.04083e-12	1.83994e-11	3.6178		Prelid3a	1.06928e-13	5.24879e-13	-4.16401		Pstpip2	0.0126505	0.0170668	2.41112		Mknk1	8.84316e-09	6.12613e-08	5.25175
Iqsec2	3.6273e-07	1.37527e-06	-1.51104		Sap30l	4.19015e-12	1.90476e-11	2.7772		Ddah1	1.07442e-13	5.27142e-13	1.76205		Ptar1	2.45668e-12	2.93747e-11	9.06033		Mkrn2	1.58235e-05	4.32825e-05	2.65635
Ckmt1a	3.62925e-07	1.37557e-06	-1.95174		Anapc11	4.28922e-12	1.94817e-11	-1.80207		Rnft2	1.39087e-13	6.79066e-13	3.90327		Ptcd1	0.00685672	0.00996427	4.39898		Mks1	0	0	2.98167
Kcnn3	3.70343e-07	1.40054e-06	-2.72458		Tbca	4.47301e-12	2.02912e-11	-2.28945		Saraf	1.42501e-13	6.94381e-13	-2.01979		Ptch1	0	0	4.52568		Mlip	7.85156e-10	6.39269e-09	2.38159
Gpi	3.74721e-07	1.41486e-06	2.02363		Dcaf7	4.58382e-12	2.07765e-11	1.31984		Slc7a11	1.42633e-13	6.94684e-13	5.4027		Ptgr1	8.84167e-11	9.17431e-10	6.22286		Mlx	0	0	2.1909
Fam43b	3.78803e-07	1.42796e-06	-2.34934		Srms	4.62632e-12	2.09605e-11	-1.81261		Kcnk6	1.43561e-13	6.98862e-13	3.14113		Ptpn2	0.00412664	0.00638404	2.02454		Mmab	1.71746e-06	6.73598e-06	4.79202
Slc9a8	3.7935e-07	1.42956e-06	-2.92774		Plxnc1	4.63205e-12	2.09778e-11	6.58963		Lmo1	1.66655e-13	8.06576e-13	3.88486		Ptpn23	0.00284262	0.00457244	2.3058		Mmp24	0.0124652	0.0172769	3.5001
Kcnip2	3.79608e-07	1.43007e-06	-2.53053		Olfr613	4.89879e-12	2.2149e-11	1.17139		Gabrb2	1.77829e-13	8.57749e-13	2.06566		Pttg1ip	0.0173337	0.0225248	3.22611		Mn1	1.03301e-08	7.03303e-08	2.93195
Slc25a22	3.92571e-07	1.47514e-06	-1.16662		Golgb1	5.16107e-12	2.32674e-11	1.49543		Fam219a	2.13103e-13	1.02493e-12	2.19163		Pvt1	1.02989e-08	7.86645e-08	8.21719		Mnat1	0.00267898	0.00427326	3.28331
Atf3	3.93473e-07	1.47759e-06	9.48578		Lrrtm1	5.25342e-12	2.36642e-11	-2.2147		Gas5	2.23803e-13	1.07524e-12	1.34096		Pwp2	0	0	4.43142		Mob2	0.00124856	0.00211667	2.02592
Psmd14	4.0154e-07	1.5031e-06	1.56336		Rps26	5.72428e-12	2.57198e-11	-1.97833		Gnptg	2.31185e-13	1.10922e-12	-3.50434		Pycard	0	0	2.50385		Mog	0.00236445	0.00380808	-4.01473
Rbm22	4.07185e-07	1.52134e-06	-1.10205		Pcnx3	5.72625e-12	2.57198e-11	1.98223		Cpsf1	2.45881e-13	1.17747e-12	4.61061		Eprs1	4.0543e-19	7.24939e-18	2.70108		Mogs	0	0	3.77205
Ptms	4.18143e-07	1.55685e-06	-1.22665		Mef2a	5.80469e-12	2.6043e-11	-2.11985		Ttc39b	2.54379e-13	1.21642e-12	2.88974		Qrsl1	4.76437e-07	2.39736e-06	3.19		Morc3	7.51412e-13	8.1246e-12	4.23465
Kcnh3	4.23172e-07	1.57211e-06	-1.26119		Shf	6.14248e-12	2.74876e-11	1.15435		Spsb1	2.56557e-13	1.22625e-12	2.05558		Rab26	0.00499501	0.00755551	2.69491		Mov10	0.000195046	0.000370152	7.11145
Pfdn6	4.32326e-07	1.59906e-06	-1.05492		Pde10a	6.28243e-12	2.80564e-11	1.26669		Rtn3	2.77649e-13	1.32579e-12	-1.28155		Rab30	0.00638534	0.00935598	2.8549		Mphosph10	0.00042416	0.00077164	3.15926
Vstm2a	4.32498e-07	1.5992e-06	-1.24512		Nptx2	6.83374e-12	3.03942e-11	6.93831		Rph3a	2.83683e-13	1.35332e-12	-1.82644		Rab3ip	5.86675e-36	3.25146e-34	2.04202		Mphosph9	0.00713768	0.0104417	2.19303
Nr1d1	4.33324e-07	1.60125e-06	-1.83819		Slc7a6	6.84217e-12	3.04192e-11	3.27402		Rnf112	2.92144e-13	1.39301e-12	-1.8746		Rabggta	0.00430669	0.00663363	2.33002		Mpv17l2	1.2229e-30	4.07823e-29	5.68809
Agrn	4.35787e-07	1.60872e-06	-1.37295		Mir5109	7.13548e-12	3.16975e-11	1.12446		Aplp2	3.01552e-13	1.43719e-12	-2.74073		Radil	0	0	6.60328		Mpzl2	8.70907e-05	0.000179051	-4.96587
Tmed9	4.41244e-07	1.62644e-06	1.10246		Ndufaf5	7.52427e-12	3.33567e-11	3.56156		Psenen	3.02108e-13	1.43915e-12	-7.01311		Rnase12	0.00136433	0.00235109	2.22306		Mrm1	0	0	6.65758
Lrrn2	4.43654e-07	1.63379e-06	-1.62725		Stx16	8.23593e-12	3.64229e-11	-3.43962		Gpr180	3.30239e-13	1.57166e-12	7.12903		Rai2	0.0113701	0.0155402	2.41425		Mro	0.0298472	0.0381725	3.13373
Rsbn1l	4.46378e-07	1.64178e-06	-3.03208		Tbcd	8.28319e-12	3.66022e-11	3.74891		Ehd3	3.39222e-13	1.61365e-12	-1.77449		Ramp2	0.0218226	0.0276093	2.06858		Mrpl37	0.00938625	0.0133853	3.18213
Nova2	4.47373e-07	1.64441e-06	-1.01686		Ttc39b	8.61781e-12	3.80655e-11	1.47335		Gid8	3.42511e-13	1.62852e-12	-2.57259		Ranbp17	0	0	5.60344		Mrpl46	0.0142496	0.0194632	2.29535
Plcg1	4.52928e-07	1.66276e-06	-2.14728		Xaf1	8.86251e-12	3.90831e-11	4.4213		Gfod1	4.27586e-13	2.02339e-12	3.75042		Rangrf	0.035113	0.0422875	3.14765		Mrps2	1.94387e-40	2.29897e-38	2.04706
Tnk2	4.53573e-07	1.6646e-06	-1.43037		Vav1	9.07959e-12	4.00242e-11	5.3854		Dusp18	4.28429e-13	2.02577e-12	-2.64004		Rapgef1	1.57819e-06	6.82018e-06	4.34726		Msantd2	0	0	6.60374
Lct	4.58518e-07	1.68014e-06	-1.64633		Ube2n	9.1376e-12	4.02637e-11	-2.03777		Artn	4.3769e-13	2.06437e-12	5.30721		Rars2	0.00427934	0.0065967	2.68337		Msh3	0	0	4.82247
Xrn1	4.60329e-07	1.68573e-06	1.22061		Zfand2b	9.63545e-12	4.2389e-11	1.98394		Cox16	4.64598e-13	2.18818e-12	-1.4759		Rasl11b	0.0176019	0.0228478	2.11115		Msl1	0.00137008	0.00230699	2.37006
Disp3	4.65534e-07	1.70215e-06	-1.53652		Arl6ip6	9.93839e-12	4.36338e-11	-1.84573		Rpl12	4.85476e-13	2.28114e-12	1.54369		Rbl2	8.47088e-19	1.48291e-17	2.35352		Msto1	0	0	5.91629
Vps35	4.6709e-07	1.70678e-06	1.3439		Khdrbs1	1.0206e-11	4.47549e-11	-3.05036		Gm1673	4.90663e-13	2.30443e-12	-1.19928		Rbm14	3.80824e-17	6.20244e-16	2.01464		Sh2d1a	4.65548e-26	1.10804e-24	2.69133
Cct4	4.69005e-07	1.71219e-06	1.28931		Fgd1	1.08497e-11	4.75202e-11	1.89497		Zfp143	4.9961e-13	2.34535e-12	-6.98825		Rbm18	0.00501678	0.0075855	2.12454		Mterf3	0.000919944	0.00158988	2.99613
Bcas2	4.75753e-07	1.73147e-06	1.13185		U2af2	1.11907e-11	4.89351e-11	-1.65491		Ndufab1	5.04766e-13	2.36844e-12	-2.88752		Rbm19	6.14546e-08	3.93135e-07	2.22661		Mtfr1	0	0	2.54274
Kctd12	4.76751e-07	1.73403e-06	1.53818		Fam162a	1.13286e-11	4.95185e-11	-4.03925		Rwdd1	5.79546e-13	2.70789e-12	-2.57383		Rbm33	0.000649754	0.00117985	3.0217		Mthfd2	0	0	3.93182
Lzts1	4.84757e-07	1.75915e-06	-1.69872		Ahctf1	1.18596e-11	5.17773e-11	8.04651		Jph3	6.15456e-13	2.87299e-12	-3.33225		Rbm41	0.00896044	0.0125957	2.2511		Mthfr	0	0	4.70138
Ankrd6	4.85308e-07	1.76027e-06	-1.92645		Gba2	1.22815e-11	5.35548e-11	-2.1796		Dpp6	6.43511e-13	2.99835e-12	-2.2207		Rbm43	4.01058e-05	9.5831e-05	2.89315		Mthfsd	0.00644348	0.00951468	3.97807
Ppp1r12b	4.91169e-07	1.77879e-06	1.05347		Crat	1.26107e-11	5.49684e-11	2.77146		Fuca1	6.70042e-13	3.11906e-12	3.87226		Rbmx	0.00174327	0.00294636	2.59049		Mtmr10	1.10466e-16	1.51405e-15	2.36301
Itga8	4.91546e-07	1.77961e-06	-2.53601		Cadps	1.27853e-11	5.57073e-11	1.14999		Ntm	6.82595e-13	3.17454e-12	1.59474		Rbpj	3.85218e-05	9.28237e-05	2.32038		Mtmr12	0.00105702	0.00181394	2.04447
Sec23ip	4.96832e-07	1.79709e-06	1.12225		Bod1l1	1.34167e-11	5.83187e-11	1.41815		Tmem70	6.98947e-13	3.24908e-12	-3.94264		Rell1	0.00115369	0.00201062	-2.96811		Mtmr9	2.71431e-13	3.02316e-12	2.05613
Uqcc2	5.06744e-07	1.82679e-06	-1.08334		Mknk1	1.36821e-11	5.9425e-11	1.37681		Enc1	7.6244e-13	3.53601e-12	-2.32441		Rev1	7.99326e-28	2.31943e-26	4.04525		Mt-tp	0	0	4.77558
Cblb	5.07691e-07	1.82908e-06	-1.02708		Commd4	1.40844e-11	6.11484e-11	1.86469		Kcnj10	9.77537e-13	4.50641e-12	-2.43379		Rev3l	0.016644	0.0217518	2.28286		Mtx1	0.00114243	0.00195	3.34616
Pdxp	5.12043e-07	1.84364e-06	-1.01766		Ccdc85b	1.42537e-11	6.18338e-11	-3.21689		Mpv17l	1.12689e-12	5.17106e-12	2.06968		Rffl	8.56162e-15	1.22846e-13	4.25955		Mvb12a	0.00057251	0.00102032	2.5696
Ccdc59	5.14822e-07	1.85138e-06	1.51066		Fbxo21	1.53476e-11	6.64473e-11	-2.36188		Nop10	1.16253e-12	5.32727e-12	-2.12765		Rftn1	0.00186725	0.00313596	4.38728		Mvd	1.07356e-25	2.48807e-24	5.13178
Ptpru	5.18704e-07	1.86307e-06	1.15002		Mrpl41	1.56863e-11	6.786e-11	-2.70269		Thoc1	1.20971e-12	5.53586e-12	1.35519		Rfx1	0.0186919	0.024065	3.95216		Mxd1	0.000311966	0.000576866	-3.5965
Sec61a1	5.28691e-07	1.89606e-06	1.23214		Acbd4	1.59486e-11	6.89673e-11	2.22359		Scd	1.22369e-12	5.5973e-12	4.36202		Rfx5	0.0224297	0.0283253	2.75873		Myadml2	0	0	5.3092
Sh3bp5	5.65138e-07	2.0133e-06	-2.03018		Hat1	1.60848e-11	6.95289e-11	2.11494		Sec23ip	1.28983e-12	5.88367e-12	1.43228		Rfxap	0.000159723	0.000315599	-2.46507		Myo5c	0.000166306	0.000319094	-3.54543
Vstm2b	5.65595e-07	2.01432e-06	-3.78561		Magt1	1.62513e-11	7.0193e-11	1.39709		Nceh1	1.407e-12	6.40648e-12	-1.40293		Rgl2	0.00397342	0.00617395	2.39224		Pkmyt1	3.53416e-07	1.69003e-06	6.82625
Tmem183a	5.66417e-07	2.01603e-06	1.63671		Gpr108	1.72284e-11	7.42081e-11	1.65735		Ube2j2	1.46727e-12	6.67784e-12	1.76968		Rgs11	0.00571373	0.00848246	2.27577		N4bp2l1	0	0	6.89945
Blnk	5.71121e-07	2.02886e-06	5.92524		Cdc42bpa	1.72533e-11	7.42857e-11	1.85526		Csrnp3	1.49043e-12	6.78015e-12	-1.81935		Ric8b	2.41532e-24	5.6945e-23	2.83072		Naa16	0.01956	0.0259293	3.53605
Ccnd2	5.71225e-07	2.02886e-06	-1.07394		Lancl1	1.84938e-11	7.94703e-11	-2.61479		Orai1	1.55944e-12	7.08444e-12	1.49901		Ripk2	0	0	3.69226		Nabp1	8.11708e-08	4.58264e-07	5.12149
Dusp14	5.83316e-07	2.06621e-06	-1.92479		Rtn4rl1	1.95791e-11	8.39355e-11	2.5815		Dkk2	1.63423e-12	7.41745e-12	2.45222		Rnf113a1	0.0164301	0.0215083	2.28181		Nacad	0.000119776	0.000237073	4.49841
Bhlhe22	5.9799e-07	2.11168e-06	-1.66867		Laptm4b	2.00408e-11	8.58355e-11	-3.42757		Kat7	1.67855e-12	7.61514e-12	-5.37808		Rnf121	0	0	4.59952		Naga	0.025708	0.0333133	2.35729
Gnl3	5.98291e-07	2.11168e-06	1.47957		Ai316807	2.06407e-11	8.83481e-11	1.89042		Prpf4	1.6882e-12	7.65548e-12	2.92589		Rnf152	6.49004e-05	0.000141674	-3.56407		Ciao3	3.26995e-30	1.04785e-28	2.57762
Sec23b	6.01655e-07	2.12162e-06	1.81502		Pja1	2.12297e-11	9.07266e-11	-2.48205		Lrba	1.80338e-12	8.15927e-12	1.23935		Rnf19b	0.0326044	0.0395843	3.16607		Ice2	1.73025e-05	4.66607e-05	4.95047
Akt3	6.11607e-07	2.15313e-06	-2.2213		Cox7a2	2.27587e-11	9.69197e-11	-1.85671		Slc25a36	1.8117e-12	8.19319e-12	2.9795		Rnf207	0	0	8.50322		Nat10	0.00668139	0.00984318	3.18872
Kcna4	6.19323e-07	2.17659e-06	1.28578		Ccl9	2.37351e-11	1.00842e-10	1.54611		Rps11	1.9228e-12	8.68385e-12	-1.17		Rnf26	0.00634292	0.00930316	2.43623		Nbeal1	1.71651e-07	8.93457e-07	7.21911
Thap3	6.21014e-07	2.18064e-06	-2.23346		Rsf1	2.94727e-11	1.24348e-10	1.45734		Mycbp2	1.96449e-12	8.86816e-12	-1.55842		Rnaseh1p1	0.00720115	0.0104079	2.39613		Nckap5l	0	0	3.04605
Twf1	6.27205e-07	2.19716e-06	-1.43308		Zdhhc20	3.00775e-11	1.26802e-10	1.55357		Ripply3	2.15417e-12	9.69375e-12	2.20864		Mrm3	0	0	7.7687		Ncln	2.28529e-32	9.10308e-31	2.00397
Satb1	6.27361e-07	2.19716e-06	-2.08914		Unc79	3.04256e-11	1.28121e-10	-3.26111		G3bp2	2.31763e-12	1.04153e-11	-1.37752		Rpap1	2.51062e-05	6.56677e-05	3.79614		Ncoa5	0.000558844	0.000998452	2.98911
Ndufv3	6.28794e-07	2.19957e-06	-1.39344		Gmeb2	3.1048e-11	1.3049e-10	2.71591		Lrp6	2.34416e-12	1.05298e-11	-2.98179		Rps6ka5	9.63988e-10	8.89028e-09	-3.46707		Ndor1	0.0007935	0.00138491	4.30707
Eml4	6.29963e-07	2.203e-06	-1.01414		Pclo	3.29223e-11	1.38049e-10	1.00787		Slx9	2.41273e-12	1.0828e-11	-4.1269		Rps6ka6	0.00196001	0.0032748	2.26947		Ndst2	0.000404937	0.000738425	5.61492
Clns1a	6.32145e-07	2.20932e-06	-1.3507		Gm20063	3.65821e-11	1.53042e-10	2.03586		Cdc42se2	2.55399e-12	1.14517e-11	-3.24851		Rps6kc1	0	0	5.79997		Ndst4	1.02365e-05	3.05975e-05	-2.9698
Cacna1b	6.3377e-07	2.21435e-06	-1.48552		Nifk	3.67356e-11	1.53508e-10	1.2456		Pef1	2.66714e-12	1.19484e-11	3.3098		Rpusd4	0	0	2.57376		Neat1	0	0	3.43563
Nudcd3	6.47822e-07	2.2541e-06	-1.21278		Timm10b	3.91983e-11	1.63424e-10	1.04172		Gtf2h3	2.68198e-12	1.20041e-11	1.93305		Rrp15	0.00392341	0.00610436	3.71809		Nebl	0.00598654	0.00891106	2.45578
Drc3	6.5335e-07	2.27132e-06	1.23316		Cfap20	4.0021e-11	1.6679e-10	-2.15067		Slfn5	2.73005e-12	1.22029e-11	2.46184		Rtel1	0	0	6.1997		Necap2	0.0337397	0.0426655	2.29714
Rpn1	6.61681e-07	2.29682e-06	1.0244		Rnf128	4.20289e-11	1.75024e-10	-4.78049		Etnk1	2.77532e-12	1.23997e-11	1.10556		Rtkn	2.93018e-32	1.14985e-30	2.04413		Nek1	0.0204519	0.0270211	2.76784
Nabp2	6.95781e-07	2.40255e-06	-1.13357		Txlng	4.49646e-11	1.86609e-10	1.89041		Plpp3	3.33588e-12	1.48313e-11	4.76653		Runx2	0.0369923	0.0442409	2.11309		Nek9	3.31509e-07	1.59659e-06	2.18903
Ttyh1	7.1941e-07	2.47834e-06	1.42867		Brip1	4.74014e-11	1.96349e-10	2.34333		Atp6v1h	3.51193e-12	1.55862e-11	-1.04393		Rxrg	0.00081965	0.00146761	-2.02643		Nelfa	0.0117213	0.0163522	4.36382
Irf2bp1	7.35205e-07	2.52318e-06	-1.77933		Gstp1	4.78864e-11	1.98283e-10	-2.66941		Psg28	3.64075e-12	1.61436e-11	1.78618		S100a6	8.82077e-06	2.84709e-05	-2.47436		Nell1	5.29154e-06	1.76672e-05	-2.90744
Srp19	7.51095e-07	2.56949e-06	1.81002		Clstn2	4.93475e-11	2.04255e-10	-1.48037		Dst	3.87561e-12	1.71698e-11	2.308		Sars2	0.00125263	0.00217237	4.03531		Neu1	0.000310777	0.000575038	2.07471
Lrrtm2	7.52253e-07	2.5727e-06	-2.96111		Kcnd2	5.15878e-11	2.13205e-10	1.79099		Neurod1	4.1725e-12	1.84442e-11	-2.38438		Sbf2	0.00499376	0.00755482	2.02043		Nfatc2	0	0	2.12435
Myh10	7.55925e-07	2.58302e-06	1.14411		Ranbp9	5.18951e-11	2.14313e-10	-2.94878		Car11	4.31263e-12	1.90468e-11	-3.41953		Sbno2	7.46112e-17	1.19685e-15	2.23458		Nfil3	3.63919e-13	4.01046e-12	4.66369
Rnf169	7.6957e-07	2.62508e-06	-3.21078		Entpd6	5.37568e-11	2.21666e-10	-1.56456		Snrpg	4.37671e-12	1.93042e-11	-1.84823		Sbsn	0.026775	0.0331435	2.13322		Nfkbil1	0	0	9.60388
Pianp	7.78716e-07	2.65249e-06	-2.2723		Glul	5.39892e-11	2.2254e-10	1.11637		Itm2c	4.82281e-12	2.12234e-11	-2.57106		Cox7a2l	8.95714e-05	0.000187178	2.40121		Nfkbiz	0	0	5.55093
Slc6a15	7.78728e-07	2.65249e-06	-2.44015		Ubxn4	5.42386e-11	2.23484e-10	1.03728		Tapbpl	5.00155e-12	2.19826e-11	2.49384		Scn4b	1.17095e-10	1.20115e-09	-5.25628		Nfs1	0.000416133	0.000757999	3.04179
Ubr3	7.84469e-07	2.66896e-06	1.73902		Atp6v0b	5.48752e-11	2.26021e-10	1.41765		Galnt16	5.03616e-12	2.21222e-11	-4.85051		Scrt1	2.26449e-06	9.20873e-06	-3.39399		Nhlrc1	1.33479e-40	1.62902e-38	3.87195
Akr7a5	7.87021e-07	2.6761e-06	-1.34868		Atp5pb	5.57173e-11	2.29144e-10	-1.83724		Cyrib	5.43497e-12	2.38352e-11	-1.73685		Sdc3	0.0255213	0.0317665	2.2091		Nhlrc2	0	0	2.01063
Cop1	7.91102e-07	2.68736e-06	2.97328		Baz2a	5.58228e-11	2.29491e-10	2.6746		Nnat	5.5883e-12	2.4454e-11	2.49866		Sec1	0.00154818	0.00264028	2.93495		Ninl	0	0	4.49806
Ivd	8.07328e-07	2.73569e-06	-1.01642		Agl	5.64558e-11	2.31919e-10	2.22734		Abce1	5.70395e-12	2.49383e-11	-4.105		Secisbp2	0.000992993	0.00175409	2.70444		Nipal2	0	0	2.85294
Csmd3	8.12981e-07	2.75247e-06	-1.63946		Rpl39	5.79981e-11	2.37897e-10	-1.27193		Mmd2	5.83171e-12	2.54857e-11	-5.53966		Coa7	0.0416926	0.0493026	2.94708		Nipbl	1.4013e-44	1.14826e-41	2.06855
Unc5a	8.32606e-07	2.81325e-06	-1.30628		Camk2g	5.92318e-11	2.42684e-10	-1.73855		Coprs	5.97643e-12	2.60953e-11	-5.55332		Sema4d	0.0360118	0.0432452	2.2562		Nkrf	0.0356228	0.0448048	3.39798
Htr4	8.43916e-07	2.84172e-06	1.26179		Stmn2	5.95988e-11	2.43917e-10	-1.77091		Uba2	6.02527e-12	2.62971e-11	-1.46965		Sephs1	0.00826098	0.0117395	3.14975		Nle1	0	0	6.91924
Rasgrf2	8.46352e-07	2.84829e-06	-2.17146		Manf	5.98625e-11	2.449e-10	-2.29191		Anapc2	6.14958e-12	2.68279e-11	-1.74919		Serac1	0.00306205	0.00488841	2.97637		Nln	0.000330453	0.000609283	3.4942
Aars1	8.4687e-07	2.84834e-06	1.99739		Emx2os	6.98843e-11	2.84302e-10	3.83308		Sp3	6.40137e-12	2.79021e-11	2.10292		Setd4	0	0	3.54224		Nme3	0.000450542	0.000816398	2.42862
Tceal3	8.47207e-07	2.84834e-06	-1.34388		Clmn	7.03245e-11	2.8588e-10	1.91672		Pi15	6.48802e-12	2.82674e-11	1.52223		Setd6	0.0115641	0.0157777	3.48201		Nme4	0.00426864	0.00653708	4.08381
Shisa6	8.62255e-07	2.89191e-06	-1.72496		Ddost	7.04687e-11	2.86359e-10	1.51744		Aatk	6.57617e-12	2.8639e-11	-2.53559		Setdb2	6.3835e-08	4.06362e-07	6.8495		Nmnat1	7.36147e-20	1.2099e-18	4.9666
Adcy9	8.6513e-07	2.89991e-06	-1.76338		Rbm14	7.1593e-11	2.9082e-10	1.61568		Tspan13	6.60354e-12	2.87331e-11	-1.669		Sfi1	0.0176386	0.0228851	2.17496		Noa1	2.13856e-07	1.0846e-06	2.31749
Rflnb	8.6856e-07	2.90893e-06	-3.11496		Eps8	7.2164e-11	2.9303e-10	7.92456		Rsrc1	7.74287e-12	3.36029e-11	-3.87572		Sh3bp5l	0.000606479	0.00110677	3.26485		Nob1	0.000979917	0.00168717	2.49606
D17wsu92e	8.80336e-07	2.93919e-06	-1.28974		Acot2	7.32879e-11	2.97483e-10	-2.63217		Macroh2a1	7.94028e-12	3.43849e-11	-1.94251		Sh3d19	0.00146703	0.00251354	3.38451		Nol11	0.0236739	0.0308868	2.15668
Grb14	8.84643e-07	2.9519e-06	-1.9141		Gprasp3	7.3901e-11	2.99749e-10	-2.01118		Arsb	8.35366e-12	3.60969e-11	-4.75503		Shc4	2.25395e-06	9.18385e-06	-2.04663		Nol9	0.00363026	0.00563093	3.41092
Ccdc85b	8.85657e-07	2.95444e-06	-1.39772		Fbn2	7.54081e-11	3.05748e-10	2.15573		Tbcc	8.73469e-12	3.76945e-11	2.21		Shkbp1	2.46183e-06	9.87265e-06	7.88431		Ltb4r2	0.00844262	0.0121492	3.82529
Slc39a13	8.98775e-07	2.99267e-06	-3.64578		Ids	7.56792e-11	3.06734e-10	-1.89194		Larp4	8.9935e-12	3.87946e-11	3.43979		Shmt1	0	0	5.14589		Notch1	0.00648717	0.00957059	2.76285
Dpf1	9.03856e-07	3.00496e-06	-1.33663		Tmem41a	7.87474e-11	3.18933e-10	2.62919		Chst15	9.27395e-12	3.99699e-11	6.88642		Siae	8.81692e-24	2.01771e-22	2.62808		Nova1	0.00923899	0.0131959	2.4938
Eif4ebp1	9.08542e-07	3.0129e-06	4.55587		Rit2	8.61063e-11	3.48091e-10	-2.82832		Pacsin1	9.53953e-12	4.10792e-11	-2.89007		Sidt1	0.0299146	0.036619	2.12332		Npat	0	0	3.97748
Irs2	9.13762e-07	3.02765e-06	-1.19606		Tomm22	8.66558e-11	3.49989e-10	-2.33167		Bcas3	9.68789e-12	4.16642e-11	-1.26805		Sil1	0.0395556	0.0470276	2.10311		Nploc4	3.60681e-05	8.54903e-05	5.66698
Pex6	9.14386e-07	3.02887e-06	-1.60824		Cpne5	8.81437e-11	3.55275e-10	1.69678		Eid1	1.04678e-11	4.49412e-11	1.2795		Simc1	8.84483e-08	5.40394e-07	3.6133		Nqo2	0.0219523	0.0288373	3.40494
Psmc6	9.27359e-07	3.06239e-06	1.57033		Synj2bp	8.84374e-11	3.56328e-10	1.55582		Lynx1	1.07783e-11	4.62543e-11	-2.52111		Sipa1	2.6881e-12	3.19133e-11	2.94398		Nrip1	0.0185098	0.024651	3.5894
Rsrc1	9.37794e-07	3.08907e-06	-1.9694		Skil	8.96528e-11	3.60958e-10	-1.77784		Slc39a3	1.08447e-11	4.65191e-11	4.54999		Six3	2.11787e-07	1.17209e-06	-3.88239		Nsdhl	0	0	3.46171
Frs3	9.41006e-07	3.09878e-06	4.26025		Zkscan8	9.02404e-11	3.6319e-10	1.34512		Cmip	1.14025e-11	4.88283e-11	1.96873		Skida1	0.0159574	0.0209764	2.02252		Nsun5	0.000481726	0.000869745	4.70495
Ncoa6	9.51731e-07	3.12973e-06	1.59846		Stx3	9.0724e-11	3.64868e-10	3.15271		Zfp160	1.17323e-11	5.02187e-11	2.80571		Slc13a4	0.00319053	0.00506861	-2.67038		Nt5c1a	0.00176637	0.00291105	4.03949
Bltp3b	9.55384e-07	3.14003e-06	1.56305		Bc018473	9.32219e-11	3.74499e-10	1.61615		Spg7	1.2003e-11	5.13336e-11	-2.6001		Slc15a2	0.029179	0.0357935	5.0712		Nubp1	0.0132862	0.0182779	3.13771
Tprg1l	9.78303e-07	3.2055e-06	-2.80401		Rgs10	9.95474e-11	3.98445e-10	4.76405		Polr2a	1.20352e-11	5.14493e-11	-4.80749		Slc16a11	1.02785e-05	3.23108e-05	2.54435		Nubp2	1.23842e-18	1.91471e-17	2.98131
Rai1	9.81089e-07	3.21195e-06	-1.23476		Zfp354a	1.00874e-10	4.03458e-10	3.52594		Sptb	1.20732e-11	5.15896e-11	3.18476		Slc16a13	0	0	4.29647		Nudt2	0	0	6.17422
Stard13	9.86237e-07	3.22523e-06	-3.19523		Anp32a	1.05709e-10	4.22025e-10	-1.55124		Rps3a1	1.31661e-11	5.6092e-11	-1.66556		Slc16a4	0	0	5.46825		Nufip1	0.0193974	0.0257256	3.39551
Akap8	9.95898e-07	3.25501e-06	1.0842		Septin9	1.07734e-10	4.29952e-10	-3.62975		Adrb1	1.32949e-11	5.66165e-11	5.65512		Slc16a7	1.00871e-05	3.17843e-05	4.99801		Nup160	0	0	5.07769
Sertad4	1.00426e-06	3.27961e-06	-2.07162		Galnt3	1.0987e-10	4.38314e-10	2.29764		Slc38a9	1.3966e-11	5.94239e-11	2.99453		Slc17a5	0.0180052	0.023317	2.29081		Nup93	0.0293677	0.0376306	2.86372
Ctnna2	1.0061e-06	3.2838e-06	-1.34543		Ubqln1	1.12039e-10	4.46478e-10	-1.51661		Csnk1g1	1.41104e-11	6.00128e-11	-6.98441		Slc17a6	3.13226e-11	3.40415e-10	-6.52206		Nup98	0.0339082	0.0428503	2.47653
Cdh8	1.00757e-06	3.28678e-06	-2.12399		Slc8a1	1.14374e-10	4.55329e-10	1.11746		Pcyox1l	1.42769e-11	6.06949e-11	-2.88882		Slc18b1	0.00775619	0.0110949	2.25162		Nutf2	1.44065e-06	5.80919e-06	-2.5953
Mctp1	1.01261e-06	3.30049e-06	-1.83575		Dscaml1	1.1815e-10	4.69496e-10	-3.55737		Ska2	1.58236e-11	6.70709e-11	2.54438		Slc22a21	0.000260397	0.000498377	3.74556		Nxpe3	7.61487e-05	0.00015947	-5.06716
Prrt3	1.02028e-06	3.32273e-06	-2.9218		Ddah2	1.26004e-10	4.99345e-10	3.164		Scarb1	1.58873e-11	6.72839e-11	1.86537		Slc22a4	0	0	3.56961		Olfml2b	0.000505978	0.000909951	5.92576
Wsb1	1.02493e-06	3.33236e-06	1.35057		Bc039771	1.34251e-10	5.3131e-10	2.35817		Celf5	1.6962e-11	7.17136e-11	1.6406		Slc22a5	0.00346516	0.00545377	5.47662		Olfml3	1.1168e-13	1.27355e-12	-2.78717
Itpr1	1.03137e-06	3.35146e-06	-1.60607		Erdr1	1.37698e-10	5.44559e-10	2.63209		Pkig	1.77025e-11	7.47498e-11	-1.5167		Slc22a8	3.23675e-05	8.07614e-05	-2.66142		Olfr46	0	0	2.33056
Riok3	1.05442e-06	3.41496e-06	1.08895		Zcrb1	1.43196e-10	5.65277e-10	1.50441		Fxr1	1.82116e-11	7.67372e-11	2.39739		Slc24a5	0	0	4.80696		Omd	1.10663e-12	1.18316e-11	-2.21829
Extl2	1.0565e-06	3.41993e-06	-1.88599		Olfr856-ps1	1.44741e-10	5.71171e-10	1.2876		Aspscr1	1.88916e-11	7.95021e-11	1.40189		Slc25a36	0.0110739	0.0151762	2.52239		Opa3	0.0018316	0.0030099	2.90674
Btaf1	1.06383e-06	3.44272e-06	1.00817		Tmem135	1.47316e-10	5.807e-10	-1.99169		Sltm	1.94565e-11	8.17762e-11	-2.81921		Slc27a3	0	0	5.06545		Ophn1	0.0167668	0.0225444	2.07109
Slc27a1	1.08361e-06	3.49521e-06	-1.13716		Tmtc1	1.63435e-10	6.41961e-10	4.63676		Nell2	1.97744e-11	8.30427e-11	-2.97615		Slc2a8	8.55857e-07	4.00895e-06	5.07966		Oplah	6.06734e-30	1.89658e-28	3.02691
Cdh11	1.08639e-06	3.50324e-06	-1.44695		Sult2b1	1.63444e-10	6.41961e-10	3.7742		Pdpk1	2.008e-11	8.42552e-11	4.16098		Slc30a6	2.07806e-24	4.90926e-23	4.26763		Orai1	4.31485e-14	5.06653e-13	-3.87294
Tanc1	1.09548e-06	3.52869e-06	1.23893		Ap4s1	2.32384e-10	9.02028e-10	-6.81838		Cntnap1	2.02839e-11	8.50391e-11	1.78206		Slc35f2	0	0	3.08131		Orai3	0.00257326	0.00411492	3.72359
Smarcc1	1.11107e-06	3.57111e-06	1.29266		Calb1	2.33022e-10	9.04182e-10	-3.67212		Sdccag8	2.13354e-11	8.92604e-11	-5.82577		Slc39a11	0	0	8.77703		Orc2	5.4146e-05	0.000119271	4.49643
Sdc3	1.11983e-06	3.5938e-06	-2.24056		Chchd7	2.5242e-10	9.76327e-10	3.22845		Zfhx3	2.14211e-11	8.95817e-11	1.00324		Slc39a12	4.30945e-12	5.00941e-11	-6.1086		Osbpl3	4.60342e-08	2.74911e-07	3.72014
Magi2	1.12e-06	3.5938e-06	1.24868		Mmp16	2.56464e-10	9.90567e-10	-3.12853		Herc1	2.18189e-11	9.1169e-11	1.98148		Slc45a4	0	0	3.68041		Osbpl7	0.0188241	0.0250232	2.88211
C12orf57	1.12226e-06	3.59826e-06	-1.61222		Zfp488	2.8118e-10	1.08258e-09	1.30306		Taf8	2.25964e-11	9.43783e-11	2.55758		Slc4a2	1.40697e-19	2.57081e-18	5.94477		Osgepl1	1.54057e-30	5.12271e-29	2.52545
Ptprd	1.12345e-06	3.6011e-06	-1.74462		Tusc2	2.81602e-10	1.08344e-09	-4.08986		Mb	2.32514e-11	9.70734e-11	1.25118		Slc5a6	0.0308287	0.0376394	2.05577		Otub2	1.11347e-14	1.35746e-13	3.34444
Gm13889	1.16876e-06	3.7281e-06	-3.94597		Gucy1a2	2.8406e-10	1.09213e-09	1.1954		Ptpru	2.39046e-11	9.96754e-11	1.28662		Slc7a11	9.30266e-07	4.31345e-06	-3.47839		Oxa1l	1.89155e-10	1.63896e-09	2.70026
Polr3e	1.17194e-06	3.7342e-06	1.52187		Gm15417	2.89818e-10	1.11348e-09	2.5157		Slit2	2.46194e-11	1.02528e-10	5.83587		Slc7a3	0.0010834	0.00189945	2.37873		P2ry14	0	0	4.14355
Lrrc57	1.17913e-06	3.75507e-06	-1.58112		Slc4a4	3.04719e-10	1.16581e-09	1.20267		Gpc6	2.59469e-11	1.07877e-10	2.25548		Slc9a5	0.00603162	0.00889006	2.21306		Pacsin2	0.0127327	0.0176114	2.3322
Dscaml1	1.18183e-06	3.7614e-06	-2.47924		Ai597479	3.19706e-10	1.22144e-09	2.77429		Cdc42bpa	2.71087e-11	1.12473e-10	2.00974		Slc9a7	5.38836e-29	1.62401e-27	2.62772		Pafah1b3	5.78276e-26	1.37066e-24	5.88556
C77370	1.19577e-06	3.8009e-06	-1.84766		Car8	3.39982e-10	1.29573e-09	6.42952		Sema4f	3.12388e-11	1.2918e-10	-5.16687		Slc9a8	0.00547033	0.00817718	2.90532		Pagr1a	0.00199436	0.00325591	2.6018
Cnot7	1.22523e-06	3.87469e-06	1.07614		Nup43	3.62587e-10	1.37995e-09	5.62682		Gon4l	3.13627e-11	1.29639e-10	3.94649		Slx4	0.00191311	0.0032033	4.41503		Pald1	0	0	3.4017
Prkcsh	1.23635e-06	3.90151e-06	1.07648		St13	3.76517e-10	1.43197e-09	1.38492		Prkaca	3.16723e-11	1.30756e-10	-2.16717		Slx4ip	0.0250468	0.031229	2.58972		Nlrp4	0	0	5.16375
Gdf15	1.2428e-06	3.91977e-06	-3.10842		Aqp7	3.88787e-10	1.47555e-09	1.82207		Zbtb7a	3.47173e-11	1.42973e-10	1.09006		Smarcad1	0.00171166	0.0028967	2.29444		Pank2	0.00296694	0.00468761	2.23764
Abcg2	1.2528e-06	3.94707e-06	-4.56536		Tsen34	4.16863e-10	1.57936e-09	-3.30837		Car5a	3.7011e-11	1.52168e-10	2.9496		Mief2	0.0022924	0.00376772	3.70568		Pank4	0.00948569	0.0135079	3.62594
B3galt5	1.25438e-06	3.95099e-06	-3.74685		Zmat3	4.51332e-10	1.70509e-09	1.22973		Psme3	4.13248e-11	1.69555e-10	1.25505		Mief1	0.0183142	0.0236517	2.14047		Papola	1.1077e-07	6.03684e-07	2.01055
Zfp692	1.25529e-06	3.95282e-06	-1.79527		Gm16702	4.62901e-10	1.74652e-09	1.43159		Rhot2	4.60319e-11	1.88174e-10	-6.58096		Smg5	0.021137	0.0268423	2.14375		Parl	0.00458476	0.00698583	3.5901
Rapgefl1	1.26646e-06	3.98374e-06	-2.15675		Ctdspl2	4.67564e-10	1.76289e-09	-4.19455		Ankrd13b	4.71188e-11	1.92379e-10	3.10974		Smg8	0	0	5.87137		Parp16	0	0	4.47174
Cldn25	1.27116e-06	3.99318e-06	1.48193		Usp17la	4.84113e-10	1.8234e-09	1.75608		Tmem127	4.75422e-11	1.93951e-10	-1.42756		Smndc1	0.000277733	0.00052965	-2.09938		Parvg	0	0	4.41745
Adgrl3	1.27659e-06	4.00918e-06	3.82103		Sertad2	4.9646e-10	1.86926e-09	3.24046		Desi1	4.76652e-11	1.94374e-10	-2.62635		Smox	0.018242	0.0235689	2.99628		Patz1	0	0	4.39955
Crym	1.27993e-06	4.01752e-06	-1.06193		Caly	5.47862e-10	2.05584e-09	-1.99264		Neu3	4.99278e-11	2.03434e-10	1.36862		Snapc4	1.24567e-14	1.75504e-13	3.13979		Pax6	0	0	2.91275
Tusc2	1.32523e-06	4.1421e-06	-1.55435		Nsrp1	5.65437e-10	2.11801e-09	-3.43543		Dnajb14	5.08029e-11	2.06831e-10	2.28801		Snapc5	2.62996e-25	6.47469e-24	-2.72437		Paxbp1	0.00231943	0.00374503	2.69372
Slc16a11	1.32962e-06	4.15142e-06	-2.33596		H2-t10	6.30235e-10	2.35025e-09	1.6428		Mphosph8	5.5257e-11	2.24782e-10	1.62831		Snhg4	2.51954e-05	6.58401e-05	4.47614		Pbld1	1.58494e-05	4.33327e-05	-2.6032
Tlcd3b	1.36101e-06	4.2438e-06	-3.03322		Ooep	6.37185e-10	2.37536e-09	1.53156		Zfp36l1	5.79406e-11	2.3503e-10	-1.90443		Snhg7	0.0254342	0.0316648	3.47295		Pcbd2	0	0	4.07265
Mzt2	1.36298e-06	4.24659e-06	-2.07582		Dclre1c	6.63566e-10	2.47117e-09	1.29135		Ptpn3	6.32923e-11	2.56322e-10	-3.85385		Snora31	0	0	5.4158		Pcdhb13	2.46304e-05	6.25964e-05	-5.63877
Gtf3c5	1.3891e-06	4.31315e-06	-3.01574		Gm4841	6.66435e-10	2.48101e-09	1.47162		Gpr174	6.7478e-11	2.72832e-10	2.141		Snora70	0	0	3.75453		Pcdhb5	0.00343412	0.00536149	4.74543
Yipf5	1.39456e-06	4.32782e-06	1.47429		Gm17644	6.85463e-10	2.54664e-09	1.59356		Ncl	7.13963e-11	2.88441e-10	1.64039		Snta1	0.0386526	0.0460804	2.1874		Pcdhga3	1.2612e-06	5.17102e-06	-7.77461
Slc17a5	1.41066e-06	4.37551e-06	-1.91093		Snph	6.91511e-10	2.56736e-09	-3.0444		Tshz3	7.21818e-11	2.91497e-10	2.07187		Snupn	8.90743e-09	6.86189e-08	3.00221		Pced1a	0	0	3.222
Ufd1	1.43748e-06	4.4435e-06	1.35415		Hyal3	6.97861e-10	2.59006e-09	1.96483		Prrt1	7.34267e-11	2.96046e-10	-3.46486		Snx22	0.0056257	0.00836665	3.55882		Pcid2	0.0307792	0.0392594	2.77305
Susd1	1.44096e-06	4.45309e-06	-3.7724		Plpp7	7.13366e-10	2.64311e-09	1.10141		Chmp2a	7.44473e-11	2.99919e-10	-2.17619		Capn15	3.70083e-42	8.01435e-40	2.56127		Pcnx3	2.2244e-05	5.74391e-05	3.58328
Megf9	1.47081e-06	4.52518e-06	-1.23483		Olfm3	7.72254e-10	2.85258e-09	1.04191		Pdgfa	7.63414e-11	3.07302e-10	4.71508		Sorcs1	3.63183e-37	2.38599e-35	3.95764		Pcnx4	9.45782e-15	1.16043e-13	7.42726
Zfp13	1.47357e-06	4.53113e-06	-3.29556		Azin2	7.75474e-10	2.86351e-09	1.17906		Rfxank	7.70355e-11	3.09971e-10	1.83831		Sox12	0.0305967	0.0373831	3.68901		Pcolce2	0.0117225	0.0163522	5.06513
Nr2f1	1.4739e-06	4.53113e-06	-2.67041		Pdcd4	7.92311e-10	2.9237e-09	-1.90215		Pigq	7.99755e-11	3.21413e-10	6.01976		Sox2	1.06588e-07	6.34e-07	-5.77492		Pcp4l1	3.51425e-05	8.36768e-05	-2.5483
Cstad	1.47804e-06	4.54152e-06	-3.73503		Fam98a	8.08996e-10	2.98326e-09	2.83891		Aatf	8.49476e-11	3.41121e-10	1.26349		Sox5	0.0132303	0.017763	3.19134		Pdcd6	0.000665311	0.00117404	2.23713
H2aj	1.51266e-06	4.63702e-06	-1.12242		Zfp513	8.53183e-10	3.1409e-09	1.20888		Iqgap2	8.77907e-11	3.52396e-10	1.11292		Speer4b	0.0267808	0.0331472	3.45501		Pde7a	0	0	3.90704
Pcbp4	1.52339e-06	4.66384e-06	-1.6499		Bc033916	8.64852e-10	3.18278e-09	2.931		Adap1	9.48226e-11	3.80013e-10	2.27591		Spen	0.00370293	0.00579136	2.48389		Pdk4	2.5442e-06	9.49174e-06	-3.18615
Penk	1.5372e-06	4.69967e-06	4.96306		Bag5	8.7252e-10	3.20776e-09	-3.04046		Caly	1.07768e-10	4.30514e-10	-2.30129		Spg11	0.0190066	0.0244084	3.63993		Pdrg1	0.000494822	0.000891845	2.57323
Tspan18	1.59795e-06	4.85807e-06	-2.90348		Emg1	9.19297e-10	3.37179e-09	2.1301		Car4	1.08558e-10	4.33496e-10	-3.03991		Spg7	0.00937853	0.0131297	2.35678		Pds5a	0.0186638	0.0248332	2.98166
Dpysl5	1.60066e-06	4.86476e-06	-4.58596		Banp	9.25866e-10	3.39474e-09	-2.89263		Snapc2	1.09112e-10	4.35534e-10	-3.74032		Sptlc2	0.0118377	0.0161059	2.89987		Pdxk-ps	0.000933577	0.00161271	-2.3629
Btbd2	1.62523e-06	4.92832e-06	-2.32025		Emc10	9.86333e-10	3.60555e-09	1.38652		Ncs1	1.09449e-10	4.36702e-10	-1.83036		Srd5a3	0.0297503	0.0364369	2.12899		Pdyn	2.17312e-12	2.26431e-11	2.85652
Slc16a10	1.63244e-06	4.94764e-06	-1.23164		L3mbtl2	1.02346e-09	3.73627e-09	3.53262		Rpf2	1.10647e-10	4.41132e-10	-3.38245		Srfbp1	0.000180491	0.000353366	5.18993		Pdzrn4	0.000139979	0.000272407	2.96773
Ndufb4	1.64764e-06	4.98858e-06	-1.20049		Tirap	1.02893e-09	3.75499e-09	2.00951		Calb2	1.10959e-10	4.42199e-10	5.63889		Sstr3	0.00118648	0.00206377	4.16495		Pecr	0.000720275	0.001265	3.39877
Nmd3	1.66501e-06	5.02698e-06	1.11652		Chst3	1.04594e-09	3.81452e-09	1.16644		Tmem67	1.12144e-10	4.46387e-10	1.56779		Dennd2b	4.42444e-05	0.000103437	2.9332		Pgap3	0.00358448	0.00557121	2.47868
Txndc15	1.67267e-06	5.04494e-06	1.3158		Zfp428	1.04864e-09	3.8218e-09	-1.98716		Zfp410	1.16454e-10	4.62623e-10	3.47504		St6galnac3	5.23101e-07	2.60636e-06	2.62391		Per3	4.40769e-18	6.62713e-17	3.82442
St3gal1	1.70724e-06	5.14395e-06	-3.36593		Pfkl	1.10757e-09	4.02449e-09	-2.88813		Bc056474	1.23885e-10	4.91559e-10	1.31232		Stab2	0	0	5.99866		Pex1	1.53111e-08	1.01414e-07	2.77481
Plekha2	1.72034e-06	5.17022e-06	1.18573		Slc23a2	1.17647e-09	4.26773e-09	1.64421		Usp33	1.31618e-10	5.21414e-10	-1.76873		Stambpl1	4.29502e-07	2.18279e-06	4.83554		Pex11c	0.000352056	0.00064693	6.88106
Tbc1d8b	1.72355e-06	5.17854e-06	-1.48077		Mrpl4	1.19721e-09	4.33575e-09	-2.10621		Psmb10	1.34385e-10	5.32165e-10	-1.28954		Gucy2c	0.0248327	0.0309852	2.8818		Pex13	0.0222823	0.0292207	2.03978
Caskin1	1.73267e-06	5.20065e-06	-2.00963		Prp4k	1.20179e-09	4.35092e-09	1.77222		Slitrk2	1.39129e-10	5.50295e-10	-2.96942		Stk38	1.29105e-08	9.69653e-08	2.29496		Pex16	0.00104244	0.00179025	2.15061
Tmbim4	1.74285e-06	5.22591e-06	2.12896		Ankrd13c	1.25005e-09	4.52114e-09	2.54533		Ermn	1.50689e-10	5.94373e-10	1.74721		Stoml1	0.00100328	0.00177146	2.23493		Pgap2	0.00477384	0.00724603	3.17526
Cir1	1.75292e-06	5.25208e-06	-1.34544		Lsm7	1.25999e-09	4.55376e-09	-2.26452		Atg12	1.64364e-10	6.47549e-10	-2.74985		Sugp2	0.00132609	0.00228924	2.39601		Pgap3	0.0354497	0.0445969	3.29852
Ccdc47	1.75684e-06	5.26114e-06	1.12886		C1qa	1.27758e-09	4.6146e-09	5.17216		Tigd3	1.74993e-10	6.88609e-10	2.6456		Suox	0	0	3.50698		Pgd	0.0011411	0.00194803	3.85776
Rgl1	1.76106e-06	5.26977e-06	-1.99311		Luzp1	1.31409e-09	4.73861e-09	-2.72815		Meltf	1.77949e-10	6.99142e-10	2.42054		Supt20	0.0172784	0.0224604	2.02637		Pggt1b	0	0	6.11378
Ssbp2	1.77841e-06	5.32034e-06	-1.72626		Ankrd26	1.36661e-09	4.92152e-09	3.34001		Rpl37a	1.79013e-10	7.03044e-10	1.68879		Supv3l1	0	0	3.99068		Pgs1	0.00468319	0.00712257	2.86831
Tmem14a	1.7825e-06	5.32988e-06	-2.12385		Kdm6b	1.47681e-09	5.29739e-09	-1.50774		Hif1a	1.8449e-10	7.23986e-10	-3.91248		Surf2	0.00475004	0.00723457	2.50364		Phactr4	0	0	4.59646
Lyrm7	1.78452e-06	5.33457e-06	-1.41173		Pds5a	1.47822e-09	5.30056e-09	1.18652		Zyg11b	1.97365e-10	7.72692e-10	1.43992		Susd1	1.43238e-14	2.01084e-13	4.38316		Phf10	0	0	7.89756
Aa414768	1.82317e-06	5.43909e-06	-1.73874		Acap2	1.50145e-09	5.37873e-09	1.00046		Gramd1a	2.05665e-10	8.04241e-10	2.96141		Sv2b	1.43339e-05	4.19681e-05	-2.42523		Phf8	0.000327233	0.000603929	-2.9042
Mgll	1.86832e-06	5.5516e-06	-2.53502		Ddo	1.52257e-09	5.45078e-09	1.15851		Gm4944	2.08451e-10	8.14818e-10	-2.16659		Sv2c	0.0343165	0.0414135	2.48901		Phtf1	0	0	2.09394
Tm7sf3	1.87053e-06	5.5537e-06	-1.901		Ndufb4	1.54498e-09	5.52922e-09	-1.78035		Trp53inp2	2.11302e-10	8.25315e-10	-4.82225		Svil	0.0352087	0.0423853	2.10237		Phtf2	1.84772e-14	2.22658e-13	-3.74893
Egr3	1.88063e-06	5.57667e-06	-1.52013		Hspa2	1.55903e-09	5.57767e-09	-2.81934		Mfn2	2.14531e-10	8.36619e-10	-3.11658		Syce2	0.00163192	0.00276937	6.19901		Phyh	0.0159458	0.0215425	3.16965
Fjx1	1.92517e-06	5.69444e-06	-2.04111		Lrrc14b	1.86039e-09	6.62656e-09	2.64581		Tnpo2	2.30565e-10	8.97751e-10	2.39763		Sycp2	0.022361	0.0282477	2.96341		Pigg	0.0176507	0.0236083	3.7793
Hmgxb3	1.93505e-06	5.71793e-06	1.57819		Ap2a2	1.8607e-09	6.62656e-09	1.34339		Tnfrsf11a	2.34014e-10	9.10822e-10	2.94222		Sympk	4.22663e-05	9.98984e-05	5.10544		Pigm	0	0	3.07132
B3galt1	1.94946e-06	5.7564e-06	-1.75787		Sema6a	1.95928e-09	6.95945e-09	1.75084		Rpl39	2.47344e-10	9.6121e-10	1.48545		Szt2	0	0	7.08645		Pign	0.00280649	0.00445805	4.5931
Kmt5c	1.96611e-06	5.79808e-06	-3.67712		Foxo1	2.02916e-09	7.19833e-09	-2.29532		Anapc5	2.49911e-10	9.7081e-10	-2.77326		Tab1	0.00180592	0.00304432	4.46261		Pigo	0.000479075	0.000865503	3.2652
Shisa4	1.96918e-06	5.80423e-06	1.34567		Zrsr2p1	2.12019e-09	7.50335e-09	-1.93826		Irgq	2.52009e-10	9.78197e-10	1.85266		Tacr1	0.000318861	0.000604435	-2.40543		Pigt	0.0025952	0.00414538	2.23701
Npy2r	1.98795e-06	5.85183e-06	-3.10509		Cep112	2.21874e-09	7.83521e-09	2.53719		Kctd14	2.52729e-10	9.80232e-10	1.75617		Tada3	0.0101023	0.0140013	2.81701		Pih1d1	0.000440672	0.000799778	3.56768
Bcan	2.01729e-06	5.92655e-06	-4.81178		Cacna1a	2.24983e-09	7.93472e-09	2.51708		Spire2	2.621e-10	1.01618e-09	7.77766		Taf1b	1.18831e-14	1.67828e-13	2.0349		Pik3r4	0.0101963	0.0144285	2.47364
Afg3l2	2.01771e-06	5.92655e-06	1.77815		Cttnbp2	2.34477e-09	8.26423e-09	1.58783		Yae1	2.62238e-10	1.01633e-09	-2.67247		Taf4	0	0	5.33817		Pim3	0.000447427	0.000811267	5.30968
Stx3	2.02714e-06	5.94686e-06	1.06102		Dhx8	2.46717e-09	8.66764e-09	2.11952		Itpripl1	2.81986e-10	1.09032e-09	4.28265		Tagap1	0.000523075	0.000963586	3.1609		Pinx1	0.00316386	0.00497612	3.27414
Lrrcc1	2.06218e-06	6.03913e-06	-2.53211		Plekhj1	2.52166e-09	8.85339e-09	-2.78644		Capza1	2.96832e-10	1.14551e-09	3.56623		Tapt1	5.56723e-05	0.00012503	4.7073		Pip4k2a	9.46123e-05	0.000191912	-2.82902
Gse1	2.08654e-06	6.09837e-06	-3.24544		Cachd1	2.53234e-09	8.8823e-09	1.01543		Emx2os	3.31746e-10	1.2768e-09	1.61531		Tarbp2	0.015747	0.0207347	2.91491		Pip4k2c	0.0233826	0.0305345	2.31815
Ubfd1	2.09888e-06	6.13292e-06	1.26939		Dnm2	2.60165e-09	9.10495e-09	2.88825		Ppp2ca	3.34413e-10	1.28558e-09	-2.19734		Tars1	0.0108042	0.01485	2.29913		Pisd-ps3	0.0266908	0.0344506	2.07758
Trp53i11	2.10639e-06	6.14891e-06	-1.03694		Vim	2.61887e-09	9.16225e-09	2.61606		Skil	3.60963e-10	1.38498e-09	-3.58602		Tars3	0.0333522	0.0403748	2.21223		Pkdcc	0	0	5.13671
Cyth1	2.10911e-06	6.15518e-06	-1.61203		Pnma8a	2.62029e-09	9.16432e-09	-2.59616		Veph1	3.83186e-10	1.46631e-09	2.59251		Tatdn3	0.0113075	0.0154665	2.67255		Pkn1	0.00326614	0.00511944	6.20066
Snhg10	2.13471e-06	6.22066e-06	-1.19811		Syne1	2.69614e-09	9.41735e-09	1.25285		Tenm3	3.96578e-10	1.5164e-09	1.97938		Tbc1d16	0.00206902	0.00343729	3.48873		Pkn2	0.00203291	0.00331319	3.1592
Wscd1	2.1645e-06	6.29658e-06	-2.68851		Gm14327	2.77472e-09	9.67344e-09	7.78826		Ikbkg	3.9711e-10	1.51785e-09	6.7208		Tbc1d23	2.32767e-05	6.18943e-05	5.04533		Plaa	0.00180655	0.00297044	2.28745
Tmem101	2.17183e-06	6.3148e-06	-1.84089		Chpf	2.8464e-09	9.90435e-09	1.22416		Zfp111	4.14604e-10	1.58109e-09	1.97005		Tbl2	0.0356377	0.0428532	2.24396		Plcl1	0.00011339	0.000225953	-2.5024
Gzf1	2.18088e-06	6.33955e-06	1.42754		Fkbp4	2.85959e-09	9.94073e-09	-2.93462		Copz1	4.21428e-10	1.6065e-09	-3.48583		Tbl3	4.37938e-20	8.23352e-19	2.04178		Plekhh2	0.000122527	0.000241892	3.98638
Lrrc4b	2.18984e-06	6.35932e-06	-3.88145		Gm5607	2.92866e-09	1.01744e-08	2.02841		Ncor2	4.32957e-10	1.64857e-09	3.3574		Tcf7l2	1.87521e-05	5.20749e-05	-3.76397		Plekho1	0	0	2.94769
Trip12	2.21676e-06	6.42802e-06	1.05376		Syt7	3.01009e-09	1.04407e-08	1.72275		Prdm8	4.34166e-10	1.65254e-09	-1.88834		Tcp11l1	0.0334954	0.0405188	3.65922		Plgrkt	0.000337846	0.000621815	4.19646
Gtf3c2	2.22683e-06	6.45246e-06	-2.11202		Zfp692	3.07999e-09	1.06729e-08	1.76348		Fkbp2	4.48471e-10	1.70439e-09	-2.0595		Tcta	1.39268e-34	6.70206e-33	2.13852		Plin4	0	0	8.16212
Adamts1	2.23884e-06	6.48406e-06	-3.96712		Plekhb1	3.36941e-09	1.16426e-08	1.18511		Coq4	4.51983e-10	1.71709e-09	1.68011		Tctn1	0.00103812	0.00182663	3.72853		Kiz	0	0	4.15942
Sema6b	2.26331e-06	6.54528e-06	-2.38636		Mrps33	3.37155e-09	1.16463e-08	-3.09321		Trim25	4.56897e-10	1.7351e-09	7.0938		Tdo2	0	0	7.55376		Plod1	0	0	4.45529
Trmt1l	2.26687e-06	6.55397e-06	1.12464		Diras1	3.6555e-09	1.25913e-08	-2.16459		Gapvd1	4.94353e-10	1.87378e-09	1.51836		Tesk1	0.00103414	0.00182073	3.37178		Plp1	3.83872e-08	2.33375e-07	-3.01053
Dync2i1	2.2954e-06	6.62035e-06	1.27688		Isca1	3.68392e-09	1.26812e-08	-3.12389		Ap1s3	5.46247e-10	2.06891e-09	4.78143		Tet1	0.0187072	0.0240768	2.39917		Plvap	1.203e-23	2.38769e-22	5.35663
Abhd4	2.29716e-06	6.62369e-06	-3.64175		Pou6f1	3.72048e-09	1.2799e-08	2.32257		Slc44a5	5.73572e-10	2.1683e-09	5.19526		Tet3	0.000633488	0.00115336	2.36418		Plxdc2	0.0205443	0.027137	2.0857
Mtx3	2.30517e-06	6.63714e-06	-2.40321		Cenpf	3.743e-09	1.28683e-08	1.297		Ap2s1	5.97467e-10	2.25352e-09	-1.76168		Tgfbr3	0.0140301	0.0187271	2.58305		Plxnb1	0	0	3.66749
Celsr2	2.31309e-06	6.65177e-06	-1.88373		Dnajc19	4.00993e-09	1.37471e-08	-1.8257		Tor4a	6.23809e-10	2.3511e-09	3.12568		Thada	0.0169537	0.0220923	2.66789		Pmpca	0.0193087	0.0256169	2.81648
Rnf157	2.33749e-06	6.70883e-06	-1.59628		Csnk1e	4.01231e-09	1.37509e-08	1.36782		Anp32b	6.33491e-10	2.38669e-09	2.34797		Thpo	2.87487e-11	3.14194e-10	6.0637		Pmpcb	9.60732e-05	0.00019452	3.95424
Map2k2	2.3397e-06	6.71355e-06	1.25135		Sec23a	4.02482e-09	1.37895e-08	-3.64836		Cdc42bpb	6.91853e-10	2.59874e-09	-1.99874		Thsd7b	0.0213673	0.0270861	2.32787		Pms2	7.0108e-25	1.53196e-23	4.76132
Prxl2a	2.34311e-06	6.72007e-06	-1.26536		Bloc1s3	4.24349e-09	1.45113e-08	1.35244		B3gnt2	6.95466e-10	2.61133e-09	2.76265		Tinf2	0.0332576	0.0402728	2.24136		Pnpla2	6.9516e-12	6.95281e-11	5.43512
Psmc2	2.34549e-06	6.72381e-06	1.57071		Chmp7	4.29291e-09	1.4662e-08	1.30501		Cryzl1	7.62097e-10	2.85829e-09	-4.07807		Tjap1	3.78972e-18	6.44143e-17	4.40571		Pnpla3	0.00422485	0.00647441	3.22532
Slc27a4	2.38896e-06	6.83662e-06	1.47932		Tceal3	4.41447e-09	1.50489e-08	-1.48452		Nemf	8.08248e-10	3.02458e-09	2.90916		Tm9sf1	9.41728e-05	0.000195605	2.82403		Pnpt1	0.00837721	0.0120657	2.98042
Ube2l6	2.42758e-06	6.92698e-06	-2.19302		Csgalnact1	5.3582e-09	1.81471e-08	-4.19392		Arl2bp	8.54267e-10	3.1932e-09	9.18733		Tmc4	0	0	5.50461		Pola1	0.0347989	0.0438744	2.45278
St6galnac6	2.43065e-06	6.93329e-06	-4.87541		Trappc3	5.62906e-09	1.90114e-08	-2.75536		Cct7	8.56169e-10	3.19912e-09	-1.88335		Tmc6	0	0	5.47547		Pole3	0	0	4.11164
Ripor2	2.43333e-06	6.93667e-06	-1.28811		Nol3	5.63892e-09	1.90377e-08	8.5991		Chordc1	8.5662e-10	3.19961e-09	1.39992		Tmco6	0	0	7.98897		Pole4	0.00926619	0.0132298	2.43488
Pcmtd2	2.44245e-06	6.95761e-06	-1.00107		Colec12	5.64034e-09	1.90377e-08	1.1139		Sdc2	8.72829e-10	3.25771e-09	1.15821		Stimate	0.00462662	0.00706499	3.34668		Polg	0.00278721	0.00443049	3.45383
Mrpl36	2.52751e-06	7.16878e-06	-1.26535		Gm4262	5.68416e-09	1.91796e-08	2.13759		Ncoa1	9.17951e-10	3.41975e-09	-2.5616		Tmem120b	0	0	6.23546		Tent4a	0.0169609	0.022784	2.22371
Hgsnat	2.53414e-06	7.18413e-06	-2.53735		Supt5	5.99445e-09	2.02017e-08	1.07249		Fzd9	9.24834e-10	3.44282e-09	1.97328		Tmem121	0.0246401	0.0307712	3.02369		Polr1a	0	0	6.01455
Prtg	2.59309e-06	7.31573e-06	-3.44497		Pdxdc1	6.04833e-09	2.03769e-08	1.24566		Uvssa	9.65491e-10	3.59283e-09	3.6523		Tmem128	0.025038	0.0312247	2.14612		Polr3b	0	0	2.90392
Rhebp1	2.6104e-06	7.35262e-06	1.23908		Chic1	6.21809e-09	2.09424e-08	1.04324		Dpm3	1.01627e-09	3.76915e-09	-2.6664		Tmem138	0.0105282	0.0145117	2.6997		Polr3c	0	0	8.91929
Cfap44	2.64616e-06	7.4391e-06	-3.17601		L3mbtl3	6.29155e-09	2.11687e-08	2.06463		Orc3	1.03193e-09	3.82299e-09	-4.97801		Tmem168	0	0	5.23133		Polr3e	0	0	5.16684
Arhgap32	2.6574e-06	7.46185e-06	1.65358		Fut8	6.42346e-09	2.15676e-08	1.04874		Zfp607	1.0482e-09	3.88039e-09	2.57463		Tmem179b	0	0	5.99798		Polr3g	0	0	7.47876
Prpf3	2.65895e-06	7.46442e-06	1.25577		Usp3	6.52398e-09	2.1858e-08	3.43411		Gspt1	1.05266e-09	3.89548e-09	-2.91821		Mfsd13a	2.41612e-15	3.55397e-14	6.61725		Pot1a	0	0	8.08163
Dmac2	2.66226e-06	7.47014e-06	-1.54861		Eme2	6.5691e-09	2.1989e-08	3.05706		Rxylt1	1.06742e-09	3.9457e-09	1.62425		Tmem181b-ps	6.06389e-13	7.61666e-12	2.02901		Pou2f1	0.0026893	0.00428902	3.21483
Sidt1	2.7088e-06	7.5863e-06	-3.72344		Syvn1	6.88924e-09	2.30112e-08	2.19704		Srp68	1.08816e-09	4.01941e-09	1.35861		Peds1	0.0185283	0.0238755	3.3635		Plpp1	1.12355e-08	7.59092e-08	7.49465
Jmjd1c	2.72813e-06	7.63139e-06	1.31121		Ndrg2	6.92385e-09	2.31127e-08	1.44602		Avpi1	1.24039e-09	4.56484e-09	4.39526		Tmem192	0.000196671	0.000382137	4.35946		Ppip5k2	5.19483e-10	4.31223e-09	2.69546
Zfand1	2.74153e-06	7.6598e-06	-2.23408		Tsga10	6.98483e-09	2.32949e-08	1.99186		Anxa11	1.32108e-09	4.85109e-09	-3.32685		Tmem229b	7.10421e-09	5.56069e-08	2.11868		Ppm1f	8.18753e-05	0.000169758	4.06541
Mrpl48	2.74468e-06	7.66496e-06	-1.48292		Cog2	7.3554e-09	2.44933e-08	4.28261		Jpt1	1.32532e-09	4.86484e-09	-2.66705		Tmem248	0.00211958	0.00351182	2.67014		Ppm1m	0	0	2.48188
Nploc4	2.76271e-06	7.71166e-06	1.27182		Prr11	7.5117e-09	2.49909e-08	1.88691		Tigit	1.36926e-09	5.02246e-09	1.6349		Lyset	1.54984e-42	4.42043e-40	2.36048		Hcrt	0.00055439	0.000991265	4.70171
Acot13	2.77972e-06	7.7445e-06	-1.28269		Casp9	7.5819e-09	2.52091e-08	3.85358		Ndufs4	1.48562e-09	5.43929e-09	-2.82602		Tmem39b	0.0121308	0.0164473	2.51889		Ppp2r5a	0.0314057	0.0400006	3.49743
Shroom2	2.80609e-06	7.80505e-06	-1.69562		Arf5	7.62105e-09	2.53316e-08	-3.17345		Cbx5	1.50272e-09	5.49989e-09	-2.13402		Tmod1	4.64683e-20	8.70834e-19	2.5574		Ppp6r1	0	0	3.72308
Aatk	2.81396e-06	7.82143e-06	-1.12989		Tmem69	7.67885e-09	2.55134e-08	1.35818		Mfap1a	1.65407e-09	6.04057e-09	-3.65416		Tnr	0.00184076	0.0030959	2.29342		Pprc1	0.00987018	0.0139877	2.72534
Lyrm4	2.86102e-06	7.93726e-06	-1.09754		Ppp2r5c	8.31236e-09	2.75456e-08	-2.32157		Trrap	1.71368e-09	6.24911e-09	-2.07315		Tom1l1	0.0266568	0.0330217	2.86576		Slc66a3	0	0	3.09355
Ptpn21	2.87452e-06	7.96535e-06	-4.69885		Capzb	8.37087e-09	2.7731e-08	-1.47099		Ncam2	1.85946e-09	6.76591e-09	-2.61033		Tox	0.00578766	0.00857698	-2.84035		Pradc1	0	0	3.84293
Aaas	2.88875e-06	7.99351e-06	-3.332		Veph1	8.66535e-09	2.86718e-08	1.46492		Tmbim4	1.97367e-09	7.16584e-09	1.33835		Tpx2	0.0413293	0.0489273	2.01037		Prcc	0.0118675	0.0165263	2.10895
Rhog	2.89183e-06	7.99912e-06	4.86205		Ppp2r2a	8.69573e-09	2.87549e-08	1.44181		Ago2	2.02319e-09	7.3403e-09	7.8808		Traf6	0.000136333	0.000272527	2.81752		Prdm15	0	0	2.59312
Rars1	2.89213e-06	7.99912e-06	1.12125		Inpp5a	8.75569e-09	2.89214e-08	6.91852		Ric8b	2.03026e-09	7.36279e-09	7.52183		Trank1	1.31542e-05	3.91512e-05	2.33778		Prdm4	0	0	4.57254
Sema4f	2.94352e-06	8.12411e-06	-3.09508		Dync1h1	8.80294e-09	2.90654e-08	1.53049		Slc17a8	2.15144e-09	7.79429e-09	2.53671		Tril	1.78664e-06	7.54387e-06	-4.21691		Prdx4	2.98454e-05	7.31802e-05	7.20043
Prrt1	2.97471e-06	8.2006e-06	-2.65193		Gimap1	9.09493e-09	2.99842e-08	1.43297		Sobp	2.15305e-09	7.79731e-09	1.23604		Trim11	0.0312766	0.0381267	2.70955		Prep	2.29297e-06	8.6729e-06	2.97076
Gm2762	3.01593e-06	8.29307e-06	1.20768		Ppie	9.38908e-09	3.09153e-08	2.47804		Rab1b	2.16503e-09	7.83786e-09	-2.2186		Triobp	0	0	5.899		Prkca	0.0085001	0.0122228	2.10928
Max	3.04702e-06	8.36866e-06	-1.59531		Ppm1m	9.39153e-09	3.09153e-08	4.01996		Cnih3	2.27835e-09	8.23616e-09	-3.77847		Trit1	0	0	5.30779		Prkcd	1.46247e-06	5.87856e-06	-3.88471
Psmd13	3.04885e-06	8.3698e-06	1.60797		Nlrp4	9.60112e-09	3.15767e-08	2.7666		Birc5	2.28629e-09	8.26188e-09	2.4086		Trmt10b	0.000947494	0.00168082	2.15705		Prkd1	0.000575666	0.00102563	5.54786
Mterf3	3.05822e-06	8.38967e-06	1.27622		Rtl6	9.91319e-09	3.25638e-08	-3.40405		Sptbn2	2.36499e-09	8.54318e-09	2.05176		Trmt10c	1.27526e-08	9.60881e-08	6.83597		Prkdc	0.0137533	0.0188572	2.01148
Arl4a	3.07697e-06	8.43913e-06	1.24098		Trp53bp1	1.02106e-08	3.34905e-08	1.02925		Thap7	2.45883e-09	8.87257e-09	-4.94411		Trmt44	0	0	3.89155		Prkx	1.10642e-05	3.25626e-05	4.41563
Col25a1	3.08019e-06	8.44601e-06	-2.47314		Atp6v0e2	1.04711e-08	3.43242e-08	-1.0539		Cachd1	2.52346e-09	9.1025e-09	5.23244		Trmu	0.00312915	0.00498194	2.6935		Proca1	0	0	5.19522
Pak4	3.12244e-06	8.54596e-06	-1.22744		Kcnab3	1.08416e-08	3.55175e-08	2.62785		Prxl2b	2.59042e-09	9.33391e-09	2.23402		Tsc2	0.000536507	0.000985884	2.61937		Prr18	0	0	3.1575
Dgkz	3.1454e-06	8.59286e-06	-2.76295		Fbxo43	1.17401e-08	3.83568e-08	1.43727		B4galnt4	2.93613e-09	1.05416e-08	-1.34715		Cep41	0.034633	0.041761	3.27512		Prss36	0	0	4.05071
Fn3k	3.16902e-06	8.64939e-06	-1.72338		Gm8234	1.17435e-08	3.83568e-08	1.02652		Pank3	3.01465e-09	1.0808e-08	1.8874		Tshz2	0.000217939	0.000421322	-2.96375		Prtg	6.335e-40	6.71876e-38	4.79906
Slc45a1	3.20795e-06	8.73777e-06	1.92768		Il11	1.21232e-08	3.95381e-08	1.57237		Zmat3	3.097e-09	1.10953e-08	2.99915		Tspan4	7.31475e-06	2.45167e-05	4.02473		Psat1	0.00327707	0.00513587	3.35779
Mrpl23	3.21759e-06	8.75764e-06	-1.3443		Smn1	1.24422e-08	4.04937e-08	1.26959		Jpx	3.18833e-09	1.14061e-08	1.43469		Tsr3	0.00339134	0.00534623	2.26426		Psd2	6.09235e-05	0.00013207	-3.35271
Slc44a5	3.26148e-06	8.86687e-06	-2.77603		Dcbld1	1.27386e-08	4.13967e-08	2.33962		Rnd1	3.19909e-09	1.14376e-08	2.8252		Tst	0.0318363	0.0387424	3.22071		Pskh1	0	0	3.46884
Acot3	3.30263e-06	8.97046e-06	-2.37173		Dnajc6	1.31861e-08	4.27618e-08	-1.66293		Svip	3.37943e-09	1.20639e-08	5.29343		Gfus	0.00015226	0.000301784	2.9265		Psmc4	4.10343e-08	2.48022e-07	2.08779
Mc1r	3.30768e-06	8.98006e-06	1.56641		Hs6st2	1.35605e-08	4.39106e-08	1.74617		Mesd	3.61264e-09	1.28642e-08	-3.76295		Ttc17	0.00348636	0.00548198	2.61835		Ptar1	0	0	8.92788
Emc6	3.33838e-06	9.04564e-06	1.35077		Rbm5	1.39153e-08	4.50063e-08	1.46127		Lratd2	3.64275e-09	1.29668e-08	-4.12311		Skic3	0.00103521	0.00182206	2.40936		Ptcd1	0.00282646	0.00448605	2.6605
Lingo1	3.34254e-06	9.05386e-06	1.94018		Eif3f	1.39546e-08	4.51201e-08	1.51538		Tsc22d4	3.68479e-09	1.30932e-08	1.92003		Ttr	0.00138819	0.00239064	-3.03581		Ptgds	2.68756e-14	3.20163e-13	-3.75144
Diap2	3.34347e-06	9.05431e-06	-1.07492		Ciao2a	1.39831e-08	4.51987e-08	-4.64683		Kif3c	3.99422e-09	1.41374e-08	-4.13583		Tub	0.00131953	0.00227826	2.55894		Ptger2	0	0	3.02985
Ryr1	3.34521e-06	9.05529e-06	-3.59992		Samd4a	1.41963e-08	4.58338e-08	1.36897		Kat6a	4.31619e-09	1.52339e-08	1.47298		Tubgcp4	0.0390211	0.046479	2.33897		Ptgfr	0.000628588	0.00111352	-2.83344
Ptchd1	3.38424e-06	9.14581e-06	1.3066		Kcnb1	1.42499e-08	4.5993e-08	1.52631		Tmem39a	4.6879e-09	1.64992e-08	5.21141		Ubac1	0.0103978	0.0143606	2.42007		Ptn	8.88727e-05	0.000182029	-2.4172
B3gnt2	3.38984e-06	9.15885e-06	-1.48687		Trl-aag2-3	1.50212e-08	4.84253e-08	2.49184		Mical3	5.04783e-09	1.7741e-08	2.2911		Ubash3b	0.00955149	0.0133383	2.69169		Ptp4a1	4.77187e-31	1.6741e-29	-3.65655
Txn2	3.39085e-06	9.1595e-06	-1.28026		Aldh6a1	1.53593e-08	4.9486e-08	-2.82225		Fermt2	5.07665e-09	1.78361e-08	1.07089		Uck2	0	0	9.19331		Ptprb	0.000675369	0.00119069	-2.09286
Septin9	3.39488e-06	9.16409e-06	-2.7973		Zfp952	1.5869e-08	5.09929e-08	3.67429		Pde5a	5.23799e-09	1.83835e-08	1.77523		Ufl1	0.00627801	0.00922067	2.71928		Pus7	0.025069	0.0325403	2.44293
Jade2	3.42677e-06	9.22904e-06	-3.9414		Patl1	1.7437e-08	5.58343e-08	4.06312		Kmt2c	5.30802e-09	1.86097e-08	2.88787		Uggt2	0.000226738	0.000437248	2.22977		Pus7l	0	0	5.35408
Arl6ip5	3.43661e-06	9.24921e-06	1.45724		Tcaf1	1.76807e-08	5.65484e-08	-2.94147		Ccdc82	5.80273e-09	2.02801e-08	1.30802		Ulk4	0	0	4.86806		Nectin1	0.00381492	0.00588862	3.09441
Farsb	3.46006e-06	9.30155e-06	1.59147		Snhg11	1.87961e-08	5.99576e-08	4.33091		Polr1g	5.9803e-09	2.08497e-08	-2.51105		Umps	0.00385132	0.00600738	3.25846		Pvt1	2.96769e-13	3.29897e-12	2.67605
Gpr158	3.46018e-06	9.30155e-06	1.30471		Arhgef17	1.88277e-08	6.00408e-08	1.18995		Cck	6.15373e-09	2.14319e-08	-3.54265		Unc13b	6.79699e-05	0.000147111	2.57354		Pwwp2a	0.00500229	0.00755779	2.07243
Rprml	3.46079e-06	9.30155e-06	-1.09343		Crim1	1.92753e-08	6.14322e-08	1.80932		Pgr	6.31294e-09	2.19788e-08	2.68656		Unc13c	0.00196215	0.00327745	-3.18889		Pycard	0	0	2.11835
Mxi1	3.46803e-06	9.31465e-06	-2.88853		Gm16523	1.99711e-08	6.35386e-08	1.29563		Slc35a4	6.7944e-09	2.36057e-08	-4.51564		Urb1	0.0086116	0.0121726	4.93975		Eprs1	0.0185285	0.0246731	2.46666
Mettl22	3.50262e-06	9.3926e-06	-2.65747		Ai413582	2.00518e-08	6.37768e-08	1.74985		Prox1	6.90407e-09	2.39701e-08	-2.41223		Usp24	3.49123e-29	1.06319e-27	2.10768		Qser1	4.27849e-06	1.47974e-05	4.55143
Gpnmb	3.52317e-06	9.43912e-06	5.9365		Smarca4	2.02456e-08	6.43182e-08	1.44963		Prkag3	6.9669e-09	2.41714e-08	2.52347		Usp25	0.00533036	0.0080017	3.03673		Qtrt1	0.0213749	0.0281336	2.67131
Ai314180	3.5433e-06	9.48658e-06	1.44161		Mkln1	2.03721e-08	6.46825e-08	-2.91652		Oscp1	7.78603e-09	2.69386e-08	-4.74537		Usp30	0.0322009	0.0391511	2.55064		R3hcc1	2.55182e-09	1.93743e-08	4.19468
Cnnm3	3.57348e-06	9.55222e-06	-1.83841		Ociad2	2.0949e-08	6.64132e-08	1.74944		Prpf40a	8.43049e-09	2.91079e-08	4.04075		Usp46	0.0074201	0.0106874	2.54274		Rab24	0.00125747	0.0021302	2.3349
Kif2a	3.58127e-06	9.5687e-06	1.60497		Blmh	2.23258e-08	7.04959e-08	3.85877		Map9	8.74356e-09	3.01057e-08	-1.97659		Usp54	0.025831	0.0321075	2.82423		Rab3gap1	0.00379098	0.00585647	2.50895
Spcs2	3.58915e-06	9.57891e-06	-1.16144		Eci1	2.296e-08	7.2415e-08	4.63028		Atp6v0e1	9.15441e-09	3.14661e-08	-3.95026		Utp15	0.00203259	0.00338207	3.08927		Rabep2	0.0083228	0.0119964	4.98773
Chga	3.59436e-06	9.59054e-06	-2.47751		Gad1	2.37144e-08	7.47078e-08	-2.31262		Intu	1.02278e-08	3.50232e-08	1.65785		Uvrag	0.000759394	0.00136495	3.46668		Rabggta	0.00122802	0.00208462	2.69171
Atp1b2	3.60981e-06	9.62742e-06	-1.88876		Gtf3c6	2.40046e-08	7.56004e-08	-1.95136		Fam78b	1.04388e-08	3.57337e-08	1.4746		Uvssa	0.0383568	0.0457604	2.15749		Rabl2	0.018396	0.0245078	2.26748
Mapk1ip1	3.6114e-06	9.62742e-06	-2.2905		Ikzf5	2.53646e-08	7.96997e-08	-2.75235		Rdx	1.07843e-08	3.68657e-08	2.80026		Vamp8	6.26312e-05	0.000137619	3.63302		Rad50	0.00035168	0.000646342	-3.96505
Galnt2	3.63542e-06	9.68487e-06	1.2651		Gap43	2.66137e-08	8.34084e-08	2.03398		Rbm14	1.1384e-08	3.88494e-08	3.79925		Vcpip1	0.00907484	0.0127412	2.50866		Rad51c	0	0	5.34435
Kctd13	3.64596e-06	9.70419e-06	-2.0113		Zfp948	2.67873e-08	8.38803e-08	2.4901		Isoc1	1.14287e-08	3.89887e-08	2.20642		Vps13c	0.000317192	0.000601466	2.04949		Rad9b	0	0	3.89587
Smg6	3.65544e-06	9.72441e-06	1.52673		Spire2	2.74561e-08	8.59253e-08	1.43506		Tle3	1.18117e-08	4.02401e-08	2.09898		Vps33b	0.00838249	0.0118919	2.07647		Ralgds	2.50526e-10	2.13366e-09	4.9098
Map1s	3.6726e-06	9.75968e-06	-1.26264		Vmn2r-ps129	3.05238e-08	9.49271e-08	2.7697		Ccny	1.18297e-08	4.0288e-08	-4.88383		Vps37c	0	0	6.36995		Ralgps1	0.0138105	0.0189311	2.45255
Prdm8	3.68096e-06	9.7731e-06	-1.71508		Trpm7	3.05544e-08	9.49954e-08	1.76935		Sf3b3	1.30053e-08	4.42164e-08	-3.10333		Vrk3	0.0183709	0.0237092	2.9238		Ranbp10	0	0	8.34005
Prpf38b	3.70924e-06	9.83711e-06	1.48786		Mapkapk2	3.11017e-08	9.65593e-08	3.14671		Rdh5	1.32503e-08	4.50341e-08	2.00388		Vwa5b2	2.43672e-08	1.71553e-07	5.35879		Ranbp9	9.77856e-07	4.16251e-06	-2.06892
Mpv17l2	3.73668e-06	9.89654e-06	1.07406		Ccdc85a	3.20337e-08	9.9368e-08	-3.2036		Srrm1	1.32945e-08	4.51686e-08	-1.76855		Wasf2	0.00950258	0.0132827	3.39223		Rangrf	0	0	3.53746
Prkdc	3.76142e-06	9.95758e-06	-1.44311		Zfp287	3.22108e-08	9.98607e-08	5.81929		Brsk1	1.36601e-08	4.63795e-08	3.22634		Rcc1l	0.0214469	0.0271694	2.51565		Rars1	0.000549795	0.000983203	2.65872
Ddx39a	3.80004e-06	1.00486e-05	1.01814		Rpn2	3.42598e-08	1.06002e-07	1.30232		Ppfia3	1.44025e-08	4.88007e-08	1.5101		Wdr25	1.46448e-07	8.4197e-07	3.52448		Rars2	0	0	3.47677
Gpatch1	3.82056e-06	1.00983e-05	1.45861		Gm5531	3.62471e-08	1.11961e-07	1.05063		Polr2m	1.49647e-08	5.06711e-08	-2.98892		Wdr41	0.00691186	0.0100332	2.00023		Rasa3	0.0258772	0.0335022	2.21702
Rab33a	3.84546e-06	1.01437e-05	1.12384		Sphk2	3.82451e-08	1.17899e-07	2.33042		Kansl1	1.6127e-08	5.45145e-08	2.21073		Wdr46	1.474e-06	6.44374e-06	5.34919		Rasl11b	1.6874e-11	1.62807e-10	3.48119
Wscd2	3.89213e-06	1.02461e-05	-1.30616		Prmt2	3.84049e-08	1.18358e-07	6.05981		Nfyb	1.63483e-08	5.52437e-08	-4.60888		Wdr5	3.62781e-13	4.6314e-12	3.00631		Rassf1	0	0	3.71839
Pde10a	3.93194e-06	1.03417e-05	-2.0179		Medag	3.9046e-08	1.20198e-07	4.14478		Wdr45b	1.69864e-08	5.73032e-08	-4.95256		Wdr5b	6.48733e-11	6.8222e-10	4.90944		Rbbp9	2.34969e-07	1.17968e-06	2.06812
Fam193b	3.96332e-06	1.0408e-05	-1.96929		Ccdc78	4.02858e-08	1.2391e-07	1.30061		St6galnac5	1.76354e-08	5.94725e-08	-6.53607		Wdr75	0.00270572	0.00437268	2.037		Rbfa	0.00359968	0.00558953	3.52914
Maco1	3.97525e-06	1.04301e-05	1.05145		Slc39a6	4.06509e-08	1.24998e-07	1.92382		Ankrd11	1.76743e-08	5.95635e-08	1.79045		Dph7	0.00435908	0.00669756	2.00072		Rbm12b1	0	0	3.53853
Epha5	4.04656e-06	1.05819e-05	1.18989		Ssr3	4.08983e-08	1.25688e-07	1.1276		Creg2	1.79058e-08	6.02827e-08	-2.84161		Wdr91	0.0318414	0.0387424	2.75107		Rbm12b2	0.0155635	0.0210871	3.15644
Cd151	4.06698e-06	1.06282e-05	4.61864		Smndc1	4.24596e-08	1.30229e-07	-4.11667		Ppp2r5d	2.06211e-08	6.9122e-08	-5.09663		Whamm	4.43082e-12	5.14538e-11	4.50366		Rbm14	0.000603821	0.00107246	3.84722
Rhbdl1	4.09766e-06	1.06942e-05	-3.40318		Neu3	4.32001e-08	1.32352e-07	1.3556		Ccl9	2.13813e-08	7.15979e-08	2.08521		Wnt2b	0	0	2.36403		Rbm15	4.90273e-13	5.35148e-12	2.05315
Lamp5	4.10553e-06	1.071e-05	-2.90831		Cnksr2	4.33109e-08	1.32654e-07	6.93865		Snrpd3	2.28658e-08	7.64155e-08	-2.18783		Wrn	0.0294681	0.0361178	3.09382		Rbm19	0	0	2.07458
Eif6	4.13619e-06	1.07813e-05	1.37975		Ccdc39	4.36081e-08	1.3349e-07	3.58602		Slc16a2	2.2874e-08	7.64173e-08	-2.95946		Wsb1	0.00218426	0.00360519	2.31706		Rbm33	0.000694447	0.00122226	2.60615
Tars1	4.17607e-06	1.08694e-05	2.03334		Comt	4.62105e-08	1.41021e-07	1.07001		Tmod3	2.28997e-08	7.64776e-08	4.1533		Wwox	2.35685e-05	6.24712e-05	-2.40085		Rbm6	0.000664249	0.00117235	3.87953
Mak16	4.17679e-06	1.08694e-05	1.14716		Ubr5	4.66366e-08	1.42242e-07	2.94005		Cenpf	2.4801e-08	8.25793e-08	1.35936		Xab2	2.58e-34	1.22148e-32	2.2153		Rbms1	0.0218237	0.0286848	-3.6468
Gemin4	4.21382e-06	1.09561e-05	-2.20241		Fbxo2	4.89298e-08	1.49028e-07	2.11096		Crebzf	2.65469e-08	8.82454e-08	4.20365		Xaf1	2.06979e-11	2.28556e-10	-3.75054		Rcan1	0.00028527	0.000530065	5.55234
Adprh	4.21866e-06	1.09663e-05	-1.30852		Alkbh5	4.9043e-08	1.49331e-07	1.72523		Elfn2	2.7862e-08	9.24634e-08	-3.90031		Xist	0.000109256	0.000223091	7.90241		Rcc2	0.00199649	0.00325892	2.11526
Car4	4.24769e-06	1.10369e-05	-1.39029		Bltp3b	4.92823e-08	1.49934e-07	2.14108		Gabra2	2.7942e-08	9.26981e-08	-3.54214		Xkr6	0.000644886	0.00117201	4.79386		Rce1	0	0	4.08585
Ptpn3	4.2537e-06	1.10501e-05	-1.31575		Zfp609	5.28403e-08	1.6009e-07	4.29567		H2aj	2.82585e-08	9.36239e-08	2.06612		Xpnpep3	3.34562e-05	8.27838e-05	3.55996		Recql	0.00124236	0.00210709	2.35812
Frmd5	4.27841e-06	1.11033e-05	-2.91939		Fkrp	5.28698e-08	1.60135e-07	7.1585		Opalin	2.89311e-08	9.57888e-08	7.35847		Xrcc3	0.0230863	0.029051	2.14087		Recql5	0.018758	0.0249468	3.98668
Lypd1	4.29569e-06	1.11395e-05	-1.31988		Tbc1d30	5.30322e-08	1.60537e-07	-1.14512		Gm20172	3.10856e-08	1.02752e-07	4.29354		Xylt1	0	0	4.29464		Relt	0	0	2.81357
Pou2f1	4.35821e-06	1.12856e-05	-1.16761		Psma5	5.64984e-08	1.70605e-07	2.13696		Ingx	3.12433e-08	1.03239e-07	2.55452		Yipf2	0.0118164	0.0160806	2.8554		Resp18	0.000121939	0.000240812	-2.60796
Gng13	4.37306e-06	1.13096e-05	-1.39078		Irf2bpl	5.67656e-08	1.71364e-07	-1.64915		Arl13b	3.16248e-08	1.04431e-07	1.53727		Yod1	0.00347519	0.00546736	2.60126		Rev1	0	0	5.21833
Bcl7a	4.43445e-06	1.14415e-05	-1.01895		Sec31a	5.70622e-08	1.72212e-07	-3.0029		Necab1	3.54721e-08	1.16826e-07	3.42451		Ypel1	0.036621	0.0438575	2.20243		Rexo1	9.05188e-05	0.00018484	2.52968
Bc1	4.47999e-06	1.15388e-05	2.30401		Atp6v1f	5.90577e-08	1.78037e-07	-1.56632		Crebbp	3.57815e-08	1.17768e-07	-2.33572		Zbed6	0.0195513	0.0250283	2.86886		Rftn1	0	0	2.9573
Disp2	4.49581e-06	1.15715e-05	-1.24414		Nmrk1	6.13909e-08	1.84867e-07	1.3926		Ncoa3	3.6126e-08	1.18863e-07	-3.05754		Zbtb2	0.0239549	0.0300245	4.33754		Rfx1	2.68645e-05	6.70999e-05	3.34606
Iffo2	4.5015e-06	1.15791e-05	-1.34264		Plxdc2	6.28357e-08	1.89024e-07	2.31428		Gins4	3.62986e-08	1.19391e-07	5.01247		Zbtb21	0.00523271	0.00787432	3.07794		Rgl2	8.48195e-21	1.44799e-19	3.18698
Mrpl32	4.57471e-06	1.17418e-05	1.23433		Slc35f4	6.4683e-08	1.94352e-07	6.05896		Tfb2m	3.99846e-08	1.31041e-07	4.32808		Zbtb22	1.27668e-05	3.82106e-05	-2.73221		Rgmb	6.0389e-06	1.97603e-05	2.30849
Mcee	4.59299e-06	1.17708e-05	-2.80951		Med18	6.58337e-08	1.97646e-07	2.2451		Vdac1p5	4.11277e-08	1.34611e-07	-2.09367		Zc3h12c	4.24383e-10	4.1253e-09	5.96435		Rgpd1	9.52555e-15	1.16749e-13	3.16979
Slc8a2	4.60508e-06	1.17992e-05	-1.22453		Phex	6.70392e-08	2.00768e-07	1.31268		Smarce1	4.13379e-08	1.3521e-07	-4.46719		Zc3h18	1.07575e-05	3.344e-05	2.37661		Rhbdd3	0	0	7.97639
Vps37a	4.65798e-06	1.19192e-05	1.33484		Peli1	6.82943e-08	2.04359e-07	1.68744		Gba1	4.18147e-08	1.36725e-07	2.65895		Zdhhc6	0.0114439	0.0156302	2.03049		Rhog	4.86998e-14	5.70086e-13	2.4542
C1qa	4.69093e-06	1.19879e-05	1.65039		Pcdhb16	7.05263e-08	2.10691e-07	3.46121		Dgcr2	4.18789e-08	1.3689e-07	-2.02696		Zfat	0	0	4.00741		Insl6	0.00071706	0.00125993	2.77817
Ai854703	4.70689e-06	1.20174e-05	-3.90901		Bco1	7.20323e-08	2.14896e-07	1.97205		Fign	4.23007e-08	1.38224e-07	5.02771		Zfhx3	5.51467e-05	0.00012404	-2.29177		Rimkla	0	0	3.69447
Slc25a21	4.7268e-06	1.20587e-05	1.58829		Flywch1	7.30297e-08	2.17634e-07	1.2647		Ptchd4	4.2345e-08	1.38323e-07	1.12954		Zfp110	0.00586825	0.0086821	3.95357		Rin2	0	0	6.2865
Wdr6	4.75062e-06	1.2109e-05	-2.29811		Cnst	7.31125e-08	2.17821e-07	3.09474		Pnma8a	4.2677e-08	1.39362e-07	-3.77128		Znf112	1.41914e-15	2.11407e-14	3.72008		Riok1	0.0031993	0.0050236	2.57971
Fktn	4.79125e-06	1.21941e-05	-1.54248		Alx4	7.48398e-08	2.22846e-07	1.08408		Extl2	4.31526e-08	1.40824e-07	-4.47712		Zfp119b	5.97279e-05	0.000132434	5.27809		Ripply2	0	0	4.308
Trip11	4.79732e-06	1.22069e-05	1.42555		Llph	7.55666e-08	2.24765e-07	1.29008		Nisch	4.5132e-08	1.47139e-07	1.9093		Zfp142	4.68684e-21	9.28948e-20	2.44836		Rnf126	1.64051e-16	2.21411e-15	2.40916
Fundc2	4.8276e-06	1.22761e-05	-1.60962		Ascc1	7.5934e-08	2.25796e-07	3.24554		Adgrb1	4.51581e-08	1.47176e-07	1.31343		Zfp182	9.57742e-05	0.000198403	2.16713		Rnf138	0.00266338	0.00425015	2.70148
Zc3h6	4.88876e-06	1.24022e-05	-1.36789		Zfp869	7.61527e-08	2.26385e-07	-6.92938		Sgms2	4.95558e-08	1.61088e-07	2.29042		Zfp191	0.0146622	0.0194664	2.39993		Rnf141	0	0	10.1745
Myo9b	4.92692e-06	1.2482e-05	1.8686		Csk	7.67068e-08	2.27908e-07	1.2517		Itga11	4.96652e-08	1.61392e-07	3.3221		Zfp213	0.01361	0.0182162	3.1019		Rnf169	0.000664024	0.00117231	2.92161
Prpf18	4.94288e-06	1.25072e-05	1.53138		Uba3	7.94607e-08	2.35641e-07	-3.03611		44990	5.002e-08	1.62439e-07	1.84488		Zfp280c	0.00190558	0.00319254	5.12068		Rnf185	1.48782e-06	5.96167e-06	2.05244
Fam135b	4.97253e-06	1.25733e-05	1.37664		Marchf5	8.0197e-08	2.3776e-07	1.54351		Jrkl	5.03656e-08	1.63455e-07	1.69478		Zfp287	0.012754	0.0171906	2.73202		Rnf19a	0.000572945	0.00102094	2.9076
Acyp1	5.01704e-06	1.26677e-05	-1.98952		Smg1	8.10724e-08	2.4016e-07	1.56652		Mprip	5.18991e-08	1.68268e-07	-1.89487		Zfp319	0.015428	0.0203629	3.25144		Rngtt	0.00251696	0.00403332	4.70632
Tacr1	5.07348e-06	1.27836e-05	-2.08086		Trim36	8.26838e-08	2.44801e-07	2.01362		Rasl12	5.27022e-08	1.70706e-07	3.90243		Zfp329	0.000645485	0.00117283	2.42987		Rora	0.0290019	0.0372158	2.30197
Sptlc1	5.0738e-06	1.27836e-05	1.02118		Vps51	8.53491e-08	2.52486e-07	-3.65391		Cttn	5.52125e-08	1.78605e-07	-3.30645		Zfp334	2.33685e-05	6.21071e-05	2.79188		Rpain	0	0	2.33448
Dnaaf10	5.11933e-06	1.28736e-05	1.33151		Chmp2b	8.96049e-08	2.64431e-07	-4.16506		Ndufa11	5.69903e-08	1.83999e-07	1.29233		Zfp358	0.00062598	0.00114075	5.49387		Nedd4	0.0128546	0.0177523	3.53386
Gadd45g	5.14613e-06	1.29217e-05	1.13808		Bicd2	9.07012e-08	2.67522e-07	3.57452		Mbnl1	5.83162e-08	1.88037e-07	2.85338		Zfp37	0.007095	0.0102684	2.08041		Rpp25l	8.02626e-09	5.62575e-08	2.16918
Zfp523	5.25833e-06	1.31615e-05	-1.32218		Npy1r	9.18858e-08	2.7087e-07	1.38429		Srsf4	5.90898e-08	1.90348e-07	-2.80841		Zfp40	3.69912e-30	1.23947e-28	4.40718		Rpp30	0.000222436	0.000418229	-2.92556
Gba2	5.29891e-06	1.32574e-05	1.3183		Crtac1	1.06093e-07	3.1082e-07	1.55886		Commd8	5.99313e-08	1.92872e-07	-3.10717		Zfp408	0.000120931	0.000244159	4.87956		Rpph1	0.0216243	0.0284358	-2.32176
Lhx2	5.31718e-06	1.32974e-05	-1.45415		Cct8	1.08473e-07	3.17368e-07	1.38376		Bloc1s3	6.07955e-08	1.9559e-07	2.93996		Zfp422	0.0251604	0.0313573	2.24205		Rps6ka4	0	0	6.64314
Mgat5b	5.46833e-06	1.36005e-05	-2.65109		Scn1b	1.0963e-07	3.20582e-07	1.13359		Bc039771	6.52451e-08	2.09366e-07	1.80841		Zfp451	0.0315905	0.0384691	2.32614		Rps6kb2	0	0	3.61082
Gm5069	5.51242e-06	1.36813e-05	-1.81642		Slc5a3	1.1061e-07	3.23361e-07	-1.87528		Man2b2	6.75331e-08	2.16569e-07	5.16685		Zfp46	0.0246474	0.0307737	2.2652		Rpusd3	0	0	5.71473
Klc2	5.5141e-06	1.36826e-05	-1.6122		Eef1d	1.12286e-07	3.27998e-07	2.08423		Ing3	6.85141e-08	2.19574e-07	2.57241		Zfp53	1.5403e-12	1.86655e-11	3.7853		Rpusd4	0	0	8.96479
Vwa3a	5.63248e-06	1.39377e-05	-3.00906		Ckap5	1.1643e-07	3.39284e-07	1.20257		Gm4951	6.95159e-08	2.225e-07	3.39304		Zfp536	0.0273705	0.0337983	2.60449		Cnot9	0.0208244	0.0274879	3.18401
Prr12	5.65588e-06	1.39842e-05	-1.31662		Atp6ap2	1.25297e-07	3.63572e-07	1.54735		Rpap3	7.54313e-08	2.40817e-07	-1.31403		Zfp583	0.0243816	0.0304907	2.45935		Rragb	5.0646e-13	5.52291e-12	7.30567
Fip1l1	5.71405e-06	1.40963e-05	1.30955		Stk19	1.28442e-07	3.72303e-07	3.74655		Gpr85	7.6738e-08	2.4491e-07	2.49947		Zfp598	0.0353958	0.0425842	3.01315		Rrp12	4.94683e-07	2.28646e-06	2.38505
Plk5	5.71544e-06	1.40963e-05	-2.53457		Itsn1	1.29365e-07	3.74878e-07	1.08121		Foxr1	7.95954e-08	2.53786e-07	1.98195		Zfp606	1.7682e-08	1.28271e-07	7.34753		Rrp8	0.000670707	0.00118284	4.44155
Znf638	5.74697e-06	1.41711e-05	1.39567		Rgs20	1.36796e-07	3.95466e-07	1.55637		Heatr6	8.09634e-08	2.57984e-07	1.27767		Zfp61	9.02015e-06	2.89546e-05	2.36411		Rsbn1	0.00037857	0.000692545	-3.07687
Nudt16	5.7727e-06	1.42226e-05	-1.28838		Nudc	1.39016e-07	4.01458e-07	-2.55032		Numa1	8.95231e-08	2.83812e-07	1.37236		Zfp629	0.000373904	0.000701836	4.05915		Rsph1	0	0	6.43459
Zbtb21	5.83146e-06	1.43444e-05	1.57891		Pigc	1.40187e-07	4.04306e-07	1.50437		Arhgef12	8.96669e-08	2.8417e-07	2.14789		Zfp639	0.0141104	0.0188214	2.04334		Rspo3	1.22704e-06	5.05264e-06	-2.45494
Hspa13	5.83212e-06	1.43444e-05	1.49152		Vsig10	1.41274e-07	4.07225e-07	1.56343		Snta1	9.09151e-08	2.8786e-07	6.87551		Zfp646	0	0	7.77498		Rufy1	3.53283e-05	8.40306e-05	3.19324
Tet3	5.8363e-06	1.43494e-05	1.04595		Tbc1d5	1.43392e-07	4.13004e-07	-2.72902		Hyal1	1.0758e-07	3.38481e-07	3.90031		Zfp653	0.0328145	0.039798	3.6356		Rwdd2a	0	0	4.00741
Larp4	5.88292e-06	1.44369e-05	1.36423		Mterf4	1.44583e-07	4.16214e-07	1.83923		Aff3	1.10636e-07	3.47657e-07	-4.46537		Zfp658	0.0348227	0.0419725	2.65176		Rwdd3	1.29009e-16	1.7619e-15	2.06555
Uqcc5	5.89166e-06	1.44523e-05	-2.25298		Prlr	1.49366e-07	4.29304e-07	4.38424		Gpr157	1.13368e-07	3.5602e-07	1.76787		Zfp68	0.0120298	0.0163311	2.47722		Rxra	3.36281e-08	2.07159e-07	6.91602
Mul1	5.95598e-06	1.45753e-05	-1.21594		Bcl9l	1.50337e-07	4.31983e-07	1.86998		Kctd1	1.13731e-07	3.57049e-07	3.64758		Zfp692	0.00479321	0.00729461	2.93882		Rxrg	7.67875e-08	4.37174e-07	-3.36684
Sh3gl2	5.98014e-06	1.46283e-05	-1.00326		Fmo5	1.55517e-07	4.46043e-07	2.47267		Was	1.16544e-07	3.65419e-07	4.48517		Zfp719	5.04141e-07	2.52157e-06	3.38296		Ryr3	1.14906e-43	5.07003e-41	2.15655
Zfp3	6.01711e-06	1.46989e-05	-3.56939		Ptcd1	1.5644e-07	4.48575e-07	6.82886		Ppp1r10	1.16683e-07	3.65741e-07	-2.62873		Zfp760	0	0	6.08965		Sall2	0.0127841	0.0176698	2.63026
Zmym5	6.06028e-06	1.4783e-05	1.1669		B3gat3	1.5729e-07	4.50773e-07	1.00813		R3hdm1	1.21711e-07	3.80784e-07	1.77612		Zfp763	2.64254e-21	5.28237e-20	5.8976		Sap30bp	0.0139619	0.0191112	2.91973
Abhd14a	6.07697e-06	1.48206e-05	-1.09742		Pcolce2	1.60324e-07	4.59349e-07	2.01343		Vamp1	1.22567e-07	3.83344e-07	-3.18373		Zfp78	0.000132999	0.00026618	-3.45447		Sarm1	0.0319603	0.0406349	4.01166
Map3k5	6.13253e-06	1.49191e-05	-2.53374		Cdh12	1.60808e-07	4.60502e-07	3.95536		Brd8	1.24159e-07	3.8808e-07	1.232		Zfp781	1.27859e-06	5.6916e-06	-3.22033		Sars2	0	0	3.5543
Klc4	6.14172e-06	1.49347e-05	-4.53256		Pef1	1.66902e-07	4.77444e-07	-3.11116		Cbx4	1.2503e-07	3.90681e-07	-2.1618		Zfp783	2.55505e-05	6.6649e-05	7.19727		Sart1	0	0	6.517
Usp8	6.14897e-06	1.49375e-05	-1.10848		Armcx1	1.71763e-07	4.9045e-07	-3.77597		Ndfip2	1.25363e-07	3.91598e-07	5.63329		Zfp790	1.08337e-36	6.70311e-35	4.51524		Slc38a2	1.25921e-13	1.43026e-12	2.0235
Med18	6.16583e-06	1.49693e-05	-1.62392		Npy	1.75375e-07	4.99849e-07	4.27106		Trmt10a	1.26507e-07	3.94924e-07	2.25635		Zfp90	2.26904e-31	8.34409e-30	3.71271		Sbf2	0.00375758	0.00580937	2.47406
Nudt18	6.18383e-06	1.50068e-05	-1.18152		Slc38a6	1.76147e-07	5.01919e-07	2.93903		Itga4	1.29736e-07	4.04751e-07	3.33919		Znf235	0.0256368	0.0318898	3.55115		Sbk1	0	0	3.21879
Parm1	6.20749e-06	1.5058e-05	-1.3066		Nolc1	1.77812e-07	5.06265e-07	1.61474		Med17	1.30168e-07	4.05973e-07	2.40509		Zfp932	0.00165823	0.00281156	2.13647		Sbsn	0.00321754	0.00505016	2.03434
Golm1	6.21166e-06	1.50619e-05	-3.03725		Msl1	1.79104e-07	5.09813e-07	1.48278		Eif3b	1.30715e-07	4.07424e-07	-1.89219		Zfp938	2.63673e-12	3.13991e-11	2.2192		Scaf4	0.00243971	0.00391884	2.46533
Pdcd6ip	6.24386e-06	1.51276e-05	1.29224		Pkd1	1.91133e-07	5.41371e-07	4.6795		Psma2	1.34835e-07	4.19222e-07	1.06989		Zfp939	7.11636e-20	1.31467e-18	6.86171		Scap	0.00282544	0.00448505	4.00673
Zfp846	6.25397e-06	1.51419e-05	-1.82236		Gjc3	2.00302e-07	5.65727e-07	1.58686		Adam28	1.34909e-07	4.19321e-07	-2.24351		Zfp944	0.000760654	0.00136679	3.21054		Scarb1	0.00249206	0.00399621	3.84274
Dhx32	6.29657e-06	1.52303e-05	1.32051		Septin5	2.01261e-07	5.67993e-07	-5.25352		Cbln3	1.36016e-07	4.22236e-07	1.68795		Zfp948	1.74211e-16	2.71268e-15	2.0583		Scd	6.14451e-10	5.06029e-09	-2.36181
Ube2f	6.30579e-06	1.52494e-05	1.06207		Alkbh6	2.19317e-07	6.16719e-07	1.08276		Polr1b	1.37861e-07	4.27698e-07	1.40742		Zfp954	5.37327e-15	7.78625e-14	4.93443		Scfd2	0.0357617	0.0449647	2.58317
Notch2	6.33832e-06	1.53206e-05	-1.2198		Vps25	2.19864e-07	6.17941e-07	-4.18451		Slc1a2	1.44145e-07	4.46638e-07	2.02024		Zfp958	1.29849e-05	3.87557e-05	4.89284		Scn4b	0.00179503	0.00295318	-5.64496
Wdr83	6.3456e-06	1.53331e-05	1.84761		Fuca1	2.20498e-07	6.19561e-07	-3.43094		Pbld1	1.48835e-07	4.60316e-07	4.29494		Zfpm2	8.65395e-06	2.80098e-05	2.02404		Scrt1	0.00120367	0.00204722	-2.77932
Spock2	6.44272e-06	1.55328e-05	-1.22607		Ptgds	2.20583e-07	6.19642e-07	1.11361		Fgfr1op2	1.53741e-07	4.74609e-07	-3.06147		Zic1	6.40804e-09	5.08325e-08	-2.96409		Sdc3	0.0230784	0.030175	2.73052
Pnma2	6.49029e-06	1.56315e-05	-2.1689		Cop1	2.23216e-07	6.26394e-07	1.04553		Tceal8	1.61525e-07	4.97561e-07	-3.25185		Znf483	0.00676713	0.00984876	3.26981		Entr1	0.00982866	0.0139358	2.28476
Pacs1	6.50929e-06	1.56741e-05	-2.29315		Tmx2	2.25576e-07	6.32527e-07	1.17156		Clvs2	1.63031e-07	5.01891e-07	-3.06071		Zkscan3	3.60409e-14	4.91787e-13	2.07504		Sec23b	8.73519e-08	4.89387e-07	2.27742
Prkab1	6.51524e-06	1.56852e-05	1.63913		Cux2	2.27342e-07	6.37152e-07	4.57205		Cyb5r1	1.63148e-07	5.02009e-07	4.17559		Znf18	0.000704537	0.00127123	2.09089		Sec31a	0.00142105	0.00238338	2.185
Urod	6.51793e-06	1.56885e-05	-1.89253		Wdr47	2.3327e-07	6.52426e-07	-2.53858		Elavl4	1.63189e-07	5.02009e-07	3.79079		Znf512b	0.0007848	0.00140759	2.72287		Sel1l3	4.10595e-09	3.01946e-08	2.93472
Crocc	6.6184e-06	1.5885e-05	-3.2823		Rasa1	2.40091e-07	6.70644e-07	2.0187		Zfp948	1.67791e-07	5.15593e-07	3.01315		Znfx1	0.0163449	0.0214135	2.95004		Sema7a	1.5996e-06	6.3431e-06	3.81626
Tpp1	6.63886e-06	1.59276e-05	-2.10156		Zfp382	2.49966e-07	6.96895e-07	4.1658		Cnnm3	1.74262e-07	5.34327e-07	-1.38818		Zranb1	9.25097e-27	2.51583e-25	2.1427		Sepsecs	1.16734e-07	6.31981e-07	4.65419
Ptprg	6.64977e-06	1.59505e-05	-1.2434		Dhx33	2.58729e-07	7.19029e-07	2.06422		Pxmp4	1.81765e-07	5.56311e-07	5.21538		Zscan22	0.00556864	0.00829551	4.00303		Serac1	0.00498191	0.00752898	2.75688
Clu	6.67774e-06	1.60013e-05	-1.81547		Nhlh2	2.60475e-07	7.22778e-07	2.08622		Uggt1	1.85628e-07	5.67785e-07	1.61411							Serinc2	0	0	7.8602
Adarb1	6.70126e-06	1.60512e-05	-1.41786		Chuk	2.67821e-07	7.409e-07	4.41461		Asb13	1.86318e-07	5.69547e-07	6.15434							Serpinc1	0	0	2.70214
Car11	6.76742e-06	1.61801e-05	-1.31708		Igsf3	2.83197e-07	7.81458e-07	1.74548		Mrtfa	1.90028e-07	5.80535e-07	3.74176							Setd6	0	0	9.11537
Vps50	6.84536e-06	1.63367e-05	1.63503		Rxra	2.84314e-07	7.84342e-07	5.60626		Flywch1	1.90541e-07	5.81925e-07	1.18418							Setdb2	0	0	8.2346
Cbx4	6.88359e-06	1.64047e-05	-1.70964		Pacsin2	2.86448e-07	7.90029e-07	1.7029		Slc28a3	1.98935e-07	6.06632e-07	2.54524							Sf3b4	2.13929e-28	6.00047e-27	2.41299
Mypop	6.89331e-06	1.64245e-05	-2.10166		Sst	2.88994e-07	7.96046e-07	1.25918		Nt5dc3	2.0468e-07	6.23773e-07	1.31773							Sfswap	3.74733e-05	8.8292e-05	2.30856
Rap1b	7.02612e-06	1.67005e-05	1.98605		Ifi203	2.90104e-07	7.98903e-07	1.45882		Pcgf1	2.05878e-07	6.27041e-07	3.87449							Sgce	2.37173e-24	4.93802e-23	8.42961
Cul3	7.05134e-06	1.67469e-05	1.86032		Mtdh	2.95564e-07	8.13324e-07	2.63592		Mical2	2.11442e-07	6.43202e-07	-1.0936							Sgcz	1.857e-07	9.56268e-07	4.32113
Pdk2	7.05825e-06	1.676e-05	-1.91623		Snrpa1	2.97821e-07	8.18915e-07	2.08773		Rb1cc1	2.13886e-07	6.50241e-07	2.4648							Sgtb	0.0113646	0.0159072	2.06505
Npas4	7.22433e-06	1.70958e-05	6.19545		Taok2	3.11802e-07	8.5456e-07	2.80145		Tlcd3b	2.23372e-07	6.76565e-07	3.67807							Sharpin	0.00118189	0.00201257	2.26216
Ide	7.2385e-06	1.71191e-05	1.18509		Trim8	3.33761e-07	9.10629e-07	1.92198		Tmem50b	2.2344e-07	6.76565e-07	-1.97836							Shc2	5.68522e-17	7.93441e-16	6.12137
Aamdc	7.29616e-06	1.72416e-05	-2.21222		Cstf2t	3.43356e-07	9.34939e-07	-1.95615		Rhox8	2.24736e-07	6.79919e-07	1.74354							Shc4	0.000347161	0.000638344	-2.26132
C2cd4c	7.47197e-06	1.75984e-05	-1.70628		Sorbs1	3.44266e-07	9.37182e-07	1.64878		Clint1	2.25076e-07	6.80743e-07	4.93973							Shcbp1l	0	0	3.36734
Syt16	7.47528e-06	1.76014e-05	-1.78967		Acox1	3.4846e-07	9.47891e-07	1.31285		Dixdc1	2.2781e-07	6.88803e-07	-3.24322							Shd	0	0	2.41084
Alas1	7.59649e-06	1.78406e-05	1.01113		Tspan6	3.48594e-07	9.48019e-07	-4.54006		Sox2-ot	2.29261e-07	6.9298e-07	2.49187							Shkbp1	0.000504873	0.000908534	2.64837
Gfra2	7.79052e-06	1.81986e-05	-2.45477		Crebl2	3.54417e-07	9.61939e-07	2.19144		Vps13a	2.30001e-07	6.94797e-07	4.82653							Shprh	3.15164e-18	4.78249e-17	2.18038
Kitl	7.82799e-06	1.82758e-05	1.05531		Bnip3l	3.59076e-07	9.73375e-07	-2.26076		Cx3cr1	2.42486e-07	7.30862e-07	1.51832							Siae	6.9401e-24	1.39434e-22	-2.80251
Arrdc1	7.82828e-06	1.82758e-05	4.29937		Tbx18	3.68017e-07	9.97115e-07	1.76464		Rps28	2.43606e-07	7.33679e-07	1.39809							Siah1b	4.47177e-05	0.00010207	-3.15355
Alad	7.89647e-06	1.83986e-05	-2.78262		Donson	3.76491e-07	1.01881e-06	3.03977		Thrap3	2.47431e-07	7.44976e-07	1.38607							Siah2	0	0	8.1903
Slc30a9	7.94e-06	1.84695e-05	-1.09818		Ppp2cb	3.83834e-07	1.03817e-06	-6.15379		Tmlhe	2.48944e-07	7.49305e-07	1.51223							Sil1	9.7626e-06	2.93856e-05	2.22674
Mtrr	7.95218e-06	1.8486e-05	-2.37937		Insl6	3.88271e-07	1.04965e-06	1.9854		Ublcp1	2.61659e-07	7.8592e-07	3.32852							Six2	9.17141e-27	2.27245e-25	-5.06439
Cxcl12	7.96168e-06	1.84978e-05	-1.74353		Dsg2	3.90747e-07	1.0554e-06	1.69093		Snrpa1	2.63528e-07	7.91059e-07	-6.51446							Six3	0.00192876	0.00315915	-2.14238
Ubn1	7.99623e-06	1.85687e-05	1.03047		Nek1	4.06062e-07	1.09368e-06	1.51296		Slx4	2.66471e-07	7.99412e-07	1.69518							Ski	0.00051309	0.00092173	2.34274
Nus1	8.02721e-06	1.86333e-05	-1.24897		Helz	4.12786e-07	1.11015e-06	1.21304		Skida1	2.81246e-07	8.42474e-07	1.80667							Skic2	2.93879e-05	7.23626e-05	3.94633
Phactr3	8.07254e-06	1.87201e-05	-1.34811		Fbxo22	4.29463e-07	1.15273e-06	2.10193		Mrap2	2.8301e-07	8.47503e-07	4.82112							Uxt	0.0045579	0.00694813	3.05864
Asnsd1	8.1072e-06	1.8771e-05	-1.18561		Irak1	4.37881e-07	1.17359e-06	1.07989		Thap6	2.85504e-07	8.5446e-07	2.84716							Slc10a7	0	0	3.97191
Cenpv	8.28076e-06	1.91091e-05	-2.02471		Mxd4	4.59222e-07	1.22628e-06	1.3094		Sfxn5	3.03914e-07	9.08199e-07	1.37665							Slc13a4	0.0356665	0.04485	-2.46007
Actr3b	8.33849e-06	1.9216e-05	-2.18144		Akap9	4.63292e-07	1.23624e-06	1.20471		Mboat2	3.1899e-07	9.52683e-07	1.56688							Slc15a2	0.0112701	0.0157883	2.73029
Atl1	8.35208e-06	1.92398e-05	1.45597		Rcbtb1	4.69821e-07	1.25335e-06	1.81396		Csf2rbp1	3.25275e-07	9.71162e-07	1.60537							Slc15a4	0.0138929	0.0190281	4.29995
Setd6	8.39093e-06	1.93104e-05	-2.57648		Robo1	4.78987e-07	1.27718e-06	3.17165		Phactr3	3.3092e-07	9.87134e-07	1.38465							Slc16a13	0.00215717	0.00350129	4.05108
Tyrobp	8.42773e-06	1.93876e-05	1.65112		Zmynd8	4.99967e-07	1.3302e-06	1.7732		Ctla2a	3.54045e-07	1.05423e-06	1.87233							Slc16a6	0.00872864	0.0125247	3.00885
Thumpd1	8.52224e-06	1.95783e-05	1.30592		Ranbp3l	5.07059e-07	1.34874e-06	1.74353		Mcf2l	3.56251e-07	1.06017e-06	-3.29668							Slc17a6	1.12073e-11	1.1036e-10	-7.83861
Plaa	8.61301e-06	1.97637e-05	1.60267		Zdhhc5	5.28608e-07	1.40332e-06	3.10584		Akr7a5	3.96454e-07	1.17665e-06	-2.14885							Slc18a2	0.000158117	0.0003044	-3.07245
Hcfc1r1	8.72802e-06	1.99926e-05	-1.47682		Smad7	5.69768e-07	1.50637e-06	5.32485		Nr1d2	3.97226e-07	1.17859e-06	-4.03693							Slc20a1	1.07114e-37	7.58528e-36	2.51279
Lpin1	8.76847e-06	2.00697e-05	-3.88604		Dkk2	5.70961e-07	1.50916e-06	1.54536		Trim37	4.03099e-07	1.19425e-06	1.24629							Slc22a21	0	0	2.47198
Lrrc14	8.92633e-06	2.03825e-05	1.78288		Kremen2	6.0505e-07	1.59386e-06	1.35621		Gga2	4.09178e-07	1.20975e-06	2.51647							Slc22a5	3.6459e-07	1.73767e-06	8.28807
Dhx37	8.94912e-06	2.04198e-05	-2.3928		Asic2	6.26931e-07	1.64951e-06	2.03179		Hnrnpul2	4.20473e-07	1.24094e-06	1.37396							Slc25a17	1.89209e-08	1.22702e-07	2.89116
Ai597468	8.99459e-06	2.04997e-05	1.50678		Sorbs2	6.3711e-07	1.67508e-06	1.59765		Arl6ip4	4.20914e-07	1.24188e-06	3.72623							Slc25a18	0.000129708	0.000254577	5.38379
Acsl3	9.09545e-06	2.06817e-05	1.33145		Ccdc47	6.59331e-07	1.72975e-06	1.72624		Psmd10	4.2345e-07	1.24899e-06	1.71439							Slc25a28	0.0347462	0.0438128	2.59844
Elfn2	9.19909e-06	2.0853e-05	-4.15957		Dld	6.72665e-07	1.76262e-06	1.38914		Mgp	4.26828e-07	1.25784e-06	1.48882							Slc26a10p	1.34746e-09	1.06022e-08	5.84856
H1-0	9.29164e-06	2.10386e-05	-1.63821		Ttc38	6.8208e-07	1.786e-06	2.23696		Cx3cl1	4.28365e-07	1.26126e-06	-1.39922							Slc30a4	0.0133824	0.0184037	3.10572
Miga1	9.29535e-06	2.10389e-05	1.93285		Ldb2	6.84661e-07	1.7919e-06	4.49061		Stx4	4.41852e-07	1.29867e-06	-2.99009							Slc31a2	1.4013e-45	1.23659e-42	3.4987
Mnt	9.4061e-06	2.12529e-05	-1.82647		Vps8	7.12233e-07	1.85682e-06	2.68739		Sp110	4.44132e-07	1.30499e-06	2.81158							Slc35b2	1.57665e-27	4.12953e-26	2.35806
Pcdhga5	9.45857e-06	2.13592e-05	-1.55204		Rnls	7.1861e-07	1.87267e-06	2.23012		Cryl1	4.50315e-07	1.32199e-06	-5.63538							Slc35b4	0.00161602	0.00267865	4.75661
Islr2	9.55458e-06	2.15525e-05	-2.45083		Zfp874b	7.23099e-07	1.88258e-06	1.20932		Pdcl3	4.57189e-07	1.3406e-06	-3.46821							Slc35f4	0.0270785	0.0349314	2.332
Ptpmt1	9.57174e-06	2.15734e-05	-2.10436		Vmn1r58	7.23101e-07	1.88258e-06	1.73798		Trim43b	4.79645e-07	1.40521e-06	2.05706							Slc35g1	4.34969e-06	1.50134e-05	-3.14751
Cdk12	9.60451e-06	2.16102e-05	1.25927		Mcm8	7.2549e-07	1.8879e-06	6.61438		Commd10	4.8678e-07	1.42444e-06	-9.34192							Slc37a1	0	0	2.84855
Cacng2	9.63414e-06	2.16685e-05	-1.39796		Mdm4	7.4158e-07	1.9261e-06	5.67364		Lonp1	4.99049e-07	1.45864e-06	1.88291							Slc37a3	0.0024346	0.00391227	3.60022
Kif26b	9.66354e-06	2.17237e-05	-3.35995		Alkbh3	7.60899e-07	1.97346e-06	3.66764		Gm7609	5.02748e-07	1.46902e-06	2.32159							Slc39a11	1.70884e-10	1.48966e-09	7.62405
Myh9	9.72809e-06	2.18424e-05	-2.0246		Bpgm	7.63329e-07	1.97929e-06	-2.74197		Plcxd2	5.10181e-07	1.4903e-06	3.38945							Slc39a12	0.000308689	0.000571359	-6.84228
Tnrc6a	9.76783e-06	2.19233e-05	1.34479		Xkr4	7.80019e-07	2.01966e-06	1.65526		Phf21a	5.1235e-07	1.49576e-06	-3.90165							Slc39a13	0	0	4.10145
Ggact	9.91913e-06	2.21953e-05	-1.96256		Slc16a10	7.80191e-07	2.01966e-06	2.95937		Pard3	5.30386e-07	1.54481e-06	1.08654							Slc39a2	0	0	7.9137
L1cam	1.01759e-05	2.26709e-05	-3.10294		Zfp704	7.87358e-07	2.03628e-06	1.04128		Epb4.1	5.47836e-07	1.59424e-06	4.54257							Slc41a2	0.0287668	0.0369348	2.81741
Phactr4	1.01958e-05	2.27024e-05	3.49914		Cyb5r3	7.97789e-07	2.0613e-06	1.64349		Gsk3b	5.51078e-07	1.60245e-06	1.33538							Slc45a4	1.42672e-09	1.11875e-08	2.36372
Akap1	1.04432e-05	2.31659e-05	-2.05442		Ptprb	8.24509e-07	2.12732e-06	4.59094		Agl	5.51136e-07	1.60245e-06	2.97812							Slc6a9	0	0	3.45317
Il20rb	1.04502e-05	2.31727e-05	-5.26526		Plin3	8.67259e-07	2.23234e-06	2.9296		Itgb6	5.56148e-07	1.61655e-06	1.97606							Slc7a11	0.0017615	0.00290386	-2.92669
Ttc4	1.04974e-05	2.32686e-05	-1.1901		Esd	8.8096e-07	2.26494e-06	2.18618		Gm15800	5.65251e-07	1.64158e-06	1.75177							Slc7a3	0.0219363	0.0288229	2.77134
Syt3	1.06521e-05	2.35144e-05	-2.0245		Maoa	8.82588e-07	2.26806e-06	2.64389		Trim32	5.69406e-07	1.6522e-06	-3.69875							Slc7a6	4.65071e-34	2.16004e-32	2.11258
Tor1a	1.06685e-05	2.35374e-05	-1.32533		Ska3	8.89404e-07	2.28219e-06	1.05769		Tbc1d13	5.70771e-07	1.65568e-06	4.14685							Slc7a6os	0	0	4.50359
Arrb2	1.07076e-05	2.36059e-05	-1.70449		Chgb	9.10572e-07	2.33338e-06	1.17501		Atg4b	5.74486e-07	1.66549e-06	-1.6996							Slc8a3	0.0135016	0.0185542	2.65179
Dclk2	1.07681e-05	2.37105e-05	-1.03446		Ptpn5	9.1753e-07	2.35066e-06	1.19194		Gm19782	6.18465e-07	1.78626e-06	2.98203							Nherf2	0.000208001	0.000392917	3.2518
Ncoa3	1.07812e-05	2.37266e-05	1.2995		Kcnn3	9.38104e-07	2.40055e-06	1.86587		Fmr1	6.27152e-07	1.8103e-06	2.02445							Slc9a5	0.0174014	0.0233075	3.09176
Kdm4c	1.07863e-05	2.37288e-05	1.51792		Csf3r	9.79055e-07	2.49949e-06	1.40247		Lrrn2	6.42304e-07	1.85297e-06	-3.88502							Slc9a7	6.15895e-29	1.81168e-27	2.79023
Slc24a3	1.09505e-05	2.40247e-05	-2.21637		Heatr1	1.00262e-06	2.55427e-06	2.00302		Riok2	6.44788e-07	1.85906e-06	4.82725							Slc9a8	0.000163494	0.000314067	4.05849
Fam50a	1.1026e-05	2.41499e-05	1.5354		Naip5	1.03343e-06	2.62724e-06	2.12418		Ccdc117	6.55451e-07	1.88817e-06	5.61518							Slco3a1	0.0232282	0.0303467	2.25477
Hmgcs1	1.11598e-05	2.43977e-05	1.45744		Rab3b	1.03638e-06	2.63352e-06	1.88005		Xkrx	6.59633e-07	1.89858e-06	2.27334							Slco5a1	1.76728e-11	1.70229e-10	-4.33626
Gm1976	1.12115e-05	2.45063e-05	-1.98652		Smpd4	1.04109e-06	2.64487e-06	4.26981		Gm9776	6.61529e-07	1.90349e-06	2.9799							Slu7	2.38818e-14	2.85091e-13	2.32315
Klhl18	1.12618e-05	2.45796e-05	-1.72364		Asxl2	1.06496e-06	2.70362e-06	1.30205		Bbof1	6.64279e-07	1.91085e-06	2.03939							Slx1b	0.00129796	0.00219555	3.13713
Bc029722	1.12788e-05	2.46067e-05	-2.42266		Atxn2l	1.07045e-06	2.71629e-06	1.95896		Snrpf	6.76882e-07	1.94543e-06	-2.63949							Slx4	0.0237308	0.0309575	2.52555
Rasd1	1.12973e-05	2.46331e-05	3.29877		Ndrg1	1.09291e-06	2.77071e-06	1.10567		Tnpo1	6.94785e-07	1.99402e-06	2.74533							Smc4	2.24557e-05	5.79293e-05	-3.26034
Csgalnact1	1.13417e-05	2.47039e-05	-1.80142		Rock1	1.1396e-06	2.88372e-06	1.15987		Dtx3	7.1728e-07	2.05563e-06	-2.1502							Mief2	0	0	9.67563
Exosc10	1.14095e-05	2.48377e-05	1.09797		Fzd9	1.17583e-06	2.96853e-06	1.96421		Stx18	7.33718e-07	2.10033e-06	-2.16929							Mief1	0.0155046	0.0210172	2.13276
Bhlhe40	1.14219e-05	2.48601e-05	-2.7303		Tmem11	1.18764e-06	2.99766e-06	1.83858		Amotl1	7.35101e-07	2.10369e-06	4.76966							Smcr8	1.94976e-06	7.52868e-06	4.72194
Zfp820	1.143e-05	2.48687e-05	1.23503		Ino80d	1.1974e-06	3.02019e-06	2.50564		Jakmip2	7.91618e-07	2.2596e-06	1.44883							Smg8	0	0	5.20166
Kcnv1	1.15218e-05	2.50479e-05	-1.81893		Pbld1	1.21148e-06	3.05429e-06	1.39583		Gatd3	7.92269e-07	2.26082e-06	1.33231							Smyd5	5.76898e-05	0.000125965	5.9368
Omg	1.15759e-05	2.514e-05	-1.38766		B4galt5	1.24507e-06	3.13609e-06	-4.45146		Gpbp1	8.07276e-07	2.30101e-06	1.42751							Snapc1	0.00355801	0.00553683	2.78786
Ankrd49	1.15803e-05	2.514e-05	1.28188		Gm20337	1.26163e-06	3.17339e-06	1.60191		Zdbf2	8.13035e-07	2.31611e-06	6.51557							Snapc2	0.0127366	0.0176147	3.4188
Grik3	1.15827e-05	2.51406e-05	-1.91312		Clec4a2	1.28647e-06	3.23216e-06	1.98634		Dek	8.20484e-07	2.33533e-06	1.07723							Snapc4	6.2769e-09	4.46981e-08	4.5308
Gdpd1	1.15993e-05	2.51675e-05	1.08289		Trmt6	1.30781e-06	3.28313e-06	1.14765		Eeig2	8.34037e-07	2.37323e-06	5.94348							Snapin	0.000612782	0.00108703	2.20986
Zswim6	1.16185e-05	2.51951e-05	-1.65643		Cntnap5b	1.30868e-06	3.28419e-06	3.16685		Lepr	8.48878e-07	2.41385e-06	1.85355							Snhg5	0	0	2.77068
Xpo1	1.16266e-05	2.52081e-05	1.57945		Birc5	1.36294e-06	3.41486e-06	1.59736		Gm16702	8.49035e-07	2.41385e-06	2.11444							Snip1	3.20519e-07	1.55135e-06	6.95315
Rhot2	1.16463e-05	2.52297e-05	-1.55171		Ntm	1.38798e-06	3.47281e-06	1.50924		Eef1e1	8.64127e-07	2.45396e-06	1.08453							Snord47	0	0	4.01166
Rdx	1.16644e-05	2.52529e-05	1.05376		Nfe2l1	1.39845e-06	3.4982e-06	1.57703		Krit1	9.22632e-07	2.61269e-06	1.91936							Snrk	0.0155993	0.0211306	2.01048
Fahd1	1.1688e-05	2.529e-05	-2.80649		Mroh1	1.42785e-06	3.56685e-06	1.29216		Zbtb4	9.29907e-07	2.63105e-06	2.19283							Sntg1	0	0	9.83162
Exog	1.1748e-05	2.54013e-05	1.24321		Ddx28	1.43944e-06	3.59415e-06	6.13858		Spock2	9.35523e-07	2.64544e-06	1.07029							Snx29	7.31011e-22	1.34609e-20	2.54079
Nrxn3	1.17902e-05	2.54737e-05	2.61458		Fam193b	1.46407e-06	3.65397e-06	4.02289		Smtnl2	9.621e-07	2.71676e-06	2.8022							Mtcl1	0.0267048	0.0344618	2.01611
Shld2	1.1911e-05	2.57066e-05	-2.68097		C2cd4b	1.65639e-06	4.11235e-06	3.09811		Snx13	1.00576e-06	2.83685e-06	1.35173							Sorbs1	3.25984e-07	1.57328e-06	2.15025
Ngly1	1.20481e-05	2.59407e-05	1.3834		R3hdm1	1.67272e-06	4.14911e-06	2.16766		Dip2b	1.05626e-06	2.97173e-06	2.91182							Sowahc	0	0	4.33356
Aurkaip1	1.24133e-05	2.65623e-05	-1.19676		Aif1	1.6758e-06	4.15486e-06	4.74188		Herc2	1.07694e-06	3.02821e-06	1.00885							Sox18	1.18764e-08	7.99099e-08	2.0015
Gpx1	1.24768e-05	2.66643e-05	-1.05519		Stam	1.68177e-06	4.16779e-06	1.19234		Slc18a2	1.08155e-06	3.03861e-06	-4.65397							Sox2	0.000695097	0.00122322	-4.51414
Kcnip4	1.24844e-05	2.66735e-05	-1.37564		Arhgap5	1.69073e-06	4.18808e-06	1.89165		Gt(rosa)26sor	1.21379e-06	3.39299e-06	1.8026							Spag6	0	0	2.93477
Cabyr	1.24856e-05	2.66735e-05	-3.37194		Pcdh9	1.71132e-06	4.2362e-06	1.0612		Cacna1h	1.30303e-06	3.62925e-06	-3.98563							Spata1	0	0	4.81859
Ints7	1.24928e-05	2.66777e-05	1.39501		Irf3	1.72986e-06	4.27822e-06	1.33703		Wnt4	1.34402e-06	3.74132e-06	3.42515							Spata2l	0.002821	0.00447862	3.25668
Eml1	1.24944e-05	2.66777e-05	-2.5508		Ndel1	1.73034e-06	4.27845e-06	1.37697		Dnajc8	1.382e-06	3.84172e-06	1.40268							Afg2a	0.0195747	0.0259429	2.65295
Doc2b	1.26203e-05	2.68834e-05	-3.20868		Pi4ka	1.77931e-06	4.39455e-06	1.32732		Ppan	1.48843e-06	4.12609e-06	5.73863							Spata7	1.46704e-16	1.987e-15	2.40111
Ahdc1	1.27536e-05	2.71379e-05	-1.16842		Grk3	1.78932e-06	4.41726e-06	6.08092		Ulk2	1.61614e-06	4.46527e-06	5.14315							Spats2	0.0200136	0.0264847	2.8347
Nalcn	1.29168e-05	2.74258e-05	-1.65137		Slc10a1	1.79017e-06	4.41836e-06	2.11696		Frmd3	1.66774e-06	4.59892e-06	4.78882							Speer4b	0	0	5.00218
Mtus2	1.30489e-05	2.76815e-05	-2.49107		Mfsd11	1.85634e-06	4.56929e-06	1.13141		Nufip2	1.683e-06	4.63847e-06	2.24441							Spink10	0	0	4.52336
Wwc1	1.30679e-05	2.77167e-05	-2.56952		Ankrd10	1.94438e-06	4.77416e-06	1.33197		Mkrn1	1.6848e-06	4.64111e-06	1.99574							Sppl2b	0	0	4.96584
Ankrd27	1.31162e-05	2.77902e-05	-2.23491		Pappa	1.99008e-06	4.88089e-06	4.99013		Slc12a2	1.71764e-06	4.7248e-06	5.76634							Spred2	0.00301001	0.00474912	2.46628
Nrip3	1.31609e-05	2.7849e-05	1.52865		Lingo3	1.99955e-06	4.90082e-06	2.87513		Nufip1	1.86136e-06	5.10331e-06	4.76453							Spred3	0.00132662	0.00224019	3.81461
Tfdp1	1.32289e-05	2.79627e-05	1.41719		Rbm10	2.08758e-06	5.10283e-06	2.16903		Psmd7	1.91777e-06	5.24644e-06	1.48433							Sptlc1	0.00349882	0.00545286	2.22849
Pikfyve	1.32683e-05	2.80359e-05	1.41957		Cry2	2.12108e-06	5.17543e-06	1.84392		Nkx2-1	1.96269e-06	5.36055e-06	2.43852							Srbd1	0.000189933	0.000361225	5.12182
Fam13b	1.33886e-05	2.8229e-05	-1.32968		Fbxo41	2.17942e-06	5.30831e-06	1.27249		Dnajc13	2.08468e-06	5.67513e-06	2.83865							Srsf6	0.000485004	0.000874976	2.58159
Glb1	1.363e-05	2.86413e-05	1.10726		Rgs2	2.21926e-06	5.39811e-06	1.5709		Zfp459	2.11576e-06	5.75348e-06	2.27549							Ssh1	4.30369e-06	1.48755e-05	3.7371
Rab27b	1.36513e-05	2.86656e-05	-2.83615		Acadsb	2.27421e-06	5.5293e-06	1.79818		Zfp457	2.24758e-06	6.1003e-06	4.0503							Sstr3	0	0	4.66167
Rab3gap1	1.3679e-05	2.87136e-05	1.30183		Map4	2.29748e-06	5.57756e-06	1.1831		Fhip1b	2.37157e-06	6.42639e-06	5.49508							Dennd2b	0.00357747	0.00556183	4.78991
Dok5	1.36881e-05	2.87223e-05	1.12774		Rreb1	2.29763e-06	5.57756e-06	1.75467		Med9	2.3726e-06	6.42742e-06	2.66312							Stab1	0.0316313	0.0402657	2.08009
Nlrp2b	1.37768e-05	2.88778e-05	-1.1594		Dock9	2.29927e-06	5.57905e-06	2.62267		Faim2	2.39194e-06	6.47806e-06	-2.86153							Stab2	0	0	2.48279
Slain1	1.3809e-05	2.89326e-05	-2.76435		Trank1	2.30635e-06	5.59331e-06	1.39509		Dis3l2	2.39851e-06	6.49234e-06	-4.45691							Gucy2c	0.0222103	0.029133	2.81349
Sacm1l	1.38631e-05	2.90225e-05	1.69572		Scand1	2.34706e-06	5.68615e-06	-2.15497		Cyb5r4	2.51851e-06	6.79143e-06	4.48202							Stard8	0	0	6.25944
Asb8	1.38769e-05	2.90411e-05	-1.72633		Lgals12	2.35853e-06	5.71269e-06	3.9706		Sin3b	2.52275e-06	6.80103e-06	2.86061							Stat2	2.22834e-12	2.31764e-11	2.2973
Elac2	1.39962e-05	2.92543e-05	2.52532		Tmem181b-ps	2.45017e-06	5.92414e-06	1.90112		Slc25a37	2.63452e-06	7.08133e-06	5.30212							Steap3	2.24854e-10	1.92646e-09	5.90275
Ajap1	1.40176e-05	2.92836e-05	-1.23394		Ahnak	2.48926e-06	6.00933e-06	1.1666		Lingo1	2.69738e-06	7.24639e-06	3.47276							Stk10	0.0235782	0.0307688	2.88325
Tor4a	1.4022e-05	2.92875e-05	1.45172		Vcl	2.51034e-06	6.05087e-06	3.23204		Lsm5	2.7311e-06	7.32518e-06	2.15287							Stk11	0	0	3.69569
Utp14a	1.40349e-05	2.93093e-05	-1.52442		Homer2	2.51269e-06	6.05519e-06	1.16334		Naa80	2.74344e-06	7.35433e-06	3.74227							Stk19	0.00122281	0.00207653	3.07667
Dnajc1	1.42067e-05	2.95797e-05	1.34154		Snai2	2.611e-06	6.281e-06	2.56188		Medag	2.83854e-06	7.59908e-06	6.11774							Stk38l	0.00464285	0.0070659	4.25707
D5ertd579e	1.42849e-05	2.96959e-05	1.25517		Top2b	2.64276e-06	6.35321e-06	2.18342		Arap2	2.85577e-06	7.64315e-06	4.59124							Stk4	0.00330922	0.005182	2.78678
Arf4	1.434e-05	2.97779e-05	1.32868		Ppan	2.65776e-06	6.38647e-06	4.06818		Naip5	2.89165e-06	7.72885e-06	3.90206							Stradb	0.000126337	0.000248514	4.07695
Zdhhc7	1.43698e-05	2.98346e-05	1.38357		Slco3a1	2.65837e-06	6.38652e-06	2.04561		Phex	2.97169e-06	7.92582e-06	2.17755							Strip1	1.56243e-09	1.21685e-08	4.57897
Bcl9l	1.44288e-05	2.99463e-05	-2.45018		Aco2	2.7155e-06	6.51373e-06	1.58973		Als2	2.988e-06	7.96721e-06	1.19229							Stx17	0	0	3.56986
Pin4	1.47303e-05	3.03638e-05	1.71955		Wdr6	2.73973e-06	6.56897e-06	-2.6208		Dhdds	3.14236e-06	8.36095e-06	5.36578							Stx2	0	0	4.2016
Pxdn	1.47489e-05	3.03916e-05	1.74916		Loricrin	2.82239e-06	6.75085e-06	3.30462		Mtrr	3.17378e-06	8.43558e-06	5.17345							Stx3	1.06143e-11	1.04792e-10	2.85331
Slc9a9	1.47927e-05	3.04686e-05	1.64614		Coasy	2.82991e-06	6.76737e-06	6.27598		Arid4b	3.22006e-06	8.55404e-06	1.91056							Stxbp3a	0.00726724	0.0106082	2.33944
Stim1	1.48506e-05	3.05584e-05	1.08641		Yars1	2.83084e-06	6.7681e-06	1.42131		Maml2	3.28387e-06	8.71383e-06	-3.56971							Sult2b1	0	0	7.34056
Dclk3	1.49163e-05	3.0683e-05	-4.06711		Fgf1	2.86775e-06	6.84886e-06	1.0667		Sox9	3.31779e-06	8.79962e-06	5.28538							Sumf2	0.0103503	0.0146266	2.46472
Fam110b	1.49367e-05	3.07159e-05	1.24491		Rgs4	2.9379e-06	7.00872e-06	1.88259		Bod1l1	3.49671e-06	9.25207e-06	2.93674							Supt3	0.00379706	0.00586507	5.41744
Ctdspl	1.50681e-05	3.09413e-05	-2.00516		Omd	2.94238e-06	7.01636e-06	1.30225		Tulp4	3.5247e-06	9.31627e-06	2.7068							Susd1	0	0	7.15636
Mrpl40	1.50829e-05	3.09608e-05	-1.37031		Fam83a	2.97829e-06	7.09733e-06	1.93592		Eprs1	3.60831e-06	9.52469e-06	1.80136							Suv39h2	0	0	4.83705
Pde1a	1.51135e-05	3.0986e-05	-2.36421		Fbxw2	3.03128e-06	7.21731e-06	1.78049		Tbca	3.64702e-06	9.61925e-06	1.05794							Sycp2	0	0	5.25147
Tbce	1.51192e-05	3.09922e-05	1.0768		Cdc26	3.14854e-06	7.48182e-06	3.08994		Ptbp3	3.68423e-06	9.70714e-06	-4.06805							Sycp3	3.61097e-06	1.28211e-05	-2.67484
Sh3rf3	1.52207e-05	3.11624e-05	-3.33724		Slc25a1	3.15697e-06	7.5002e-06	3.48678		Kremen2	3.87006e-06	1.01785e-05	3.03694							Sytl2	0	0	2.55062
Cby1	1.52352e-05	3.11867e-05	-2.35052		Gemin5	3.22311e-06	7.64237e-06	7.82286		Lpin2	3.97637e-06	1.04411e-05	1.76781							Taf15	0.00339846	0.00531016	4.44949
Memo1	1.52909e-05	3.12899e-05	-1.37757		Pycr1	3.43147e-06	8.09948e-06	1.18281		Cldn11	3.99149e-06	1.0478e-05	4.35922							Taf2	4.16011e-08	2.51153e-07	5.05675
Hipk4	1.53177e-05	3.13291e-05	1.08699		Lrrc3	3.70549e-06	8.70674e-06	2.27688		Rsad1	4.00916e-06	1.05217e-05	6.11082							Taf5	0	0	2.57037
Prkar2a	1.53803e-05	3.144e-05	1.38095		Appbp2	3.79015e-06	8.89648e-06	1.53642		Ranbp3l	4.13794e-06	1.08511e-05	2.30427							Tars3	0.0215657	0.0283685	2.36988
Pip4k2b	1.54969e-05	3.16401e-05	-2.0174		Fam78b	3.9433e-06	9.2278e-06	1.48203		Hsd17b8	4.14918e-06	1.08777e-05	4.02959							Tafazzin	5.52784e-08	3.25207e-07	3.23649
Scg5	1.55608e-05	3.17595e-05	-1.0539		Car5a	4.03791e-06	9.43503e-06	1.19288		Atad2b	4.80518e-06	1.249e-05	2.95908							Tbc1d1	6.70656e-39	5.65718e-37	4.6022
Dxo	1.56226e-05	3.18525e-05	-2.50842		Rhbdl3	4.05187e-06	9.46362e-06	4.46196		Tmem42	4.86306e-06	1.26202e-05	2.00036							Tbce	0	0	6.7563
Npy	1.56255e-05	3.1853e-05	1.35493		Was	4.05829e-06	9.47253e-06	1.78183		Slc10a1	4.88802e-06	1.26817e-05	2.99842							Tbck	6.90261e-09	4.89109e-08	6.69618
Kcnn1	1.60026e-05	3.25165e-05	1.1639		Hook3	4.09353e-06	9.54662e-06	1.2452		Iws1	4.9021e-06	1.27149e-05	1.53868							Tbl3	0.00657528	0.00969308	3.5251
Setd2	1.60072e-05	3.25187e-05	1.01089		Kcna2	4.2205e-06	9.83013e-06	1.30188		Ndufa7	5.02386e-06	1.30149e-05	1.99299							Tbp	7.29215e-08	4.17443e-07	2.45557
Tmem201	1.61534e-05	3.27651e-05	-1.01585		Gpr174	4.44612e-06	1.03094e-05	1.72668		Lct	5.29344e-06	1.36909e-05	-1.70906							Tcaim	0.0290785	0.0373016	2.74601
Sde2	1.61689e-05	3.27908e-05	1.31292		Psmd2	4.49925e-06	1.04304e-05	1.20833		Hs3st4	5.45446e-06	1.40928e-05	3.20402							Tceanc2	1.60421e-05	4.38074e-05	4.10667
Psmf1	1.62046e-05	3.28463e-05	1.14518		Lrrc4c	4.65804e-06	1.0778e-05	2.2253		Kansl1	5.5329e-06	1.42881e-05	1.32154							Tcf7l1	0	0	5.28528
Bag5	1.6214e-05	3.28494e-05	-1.19998		Glod4	4.71572e-06	1.09045e-05	1.31502		Hdgfrp2	5.76664e-06	1.48533e-05	1.31833							Tcf7l2	1.72907e-05	4.66397e-05	-2.85342
Fxyd6	1.62272e-05	3.28639e-05	-2.48984		Agpat1	4.75043e-06	1.09801e-05	1.26242		Rgs7	5.79725e-06	1.49245e-05	2.1718							Tcirg1	0	0	5.04091
Vars1	1.62421e-05	3.28883e-05	-1.30925		St18	4.76683e-06	1.10133e-05	1.43528		Lsm11	5.92619e-06	1.52447e-05	3.73725							Tcp11l1	0	0	7.32655
Glod4	1.62971e-05	3.29885e-05	-1.24092		Tmem106b	4.83759e-06	1.11697e-05	1.2047		Gpr37l1	6.20239e-06	1.59142e-05	5.64105							Tctn1	0	0	6.46663
Ssr4	1.63425e-05	3.30632e-05	1.141		Lhfpl3	4.88936e-06	1.12869e-05	1.5443		Rbm28	6.72773e-06	1.72048e-05	1.09062							Tdo2	0	0	6.85664
Nampt	1.64352e-05	3.3211e-05	-1.30498		Derl1	4.93218e-06	1.13761e-05	2.06903		Yeats2	6.76144e-06	1.72865e-05	6.53899							Tefm	0.000372515	0.000682449	-2.03459
Nfil3	1.6564e-05	3.34427e-05	1.27304		Abca2	4.93852e-06	1.13859e-05	1.54221		Dnajc27	6.94602e-06	1.77403e-05	1.8407							Telo2	0	0	4.95215
Large1	1.69282e-05	3.40035e-05	1.0748		Rnf4	4.96121e-06	1.14334e-05	1.58167		Pacc1	7.14189e-06	1.82266e-05	1.43292							Tfdp2	0.00681733	0.0100254	2.89718
Arxes1	1.70983e-05	3.42983e-05	1.74348		Lemd2	5.19859e-06	1.19401e-05	2.5943		Tdrd1	7.14951e-06	1.82414e-05	1.67234							Tgfa	0.028643	0.0367964	3.39121
Ccl25	1.71142e-05	3.43132e-05	-3.73145		Htr4	5.25134e-06	1.20562e-05	3.50441		Grhpr	7.39414e-06	1.88415e-05	2.06884							Thoc5	0.00676649	0.00995705	3.92407
Tenm1	1.71144e-05	3.43132e-05	-2.24051		Tnfrsf10b	5.32646e-06	1.22184e-05	1.86233		Ankrd17	7.53163e-06	1.91821e-05	3.35277							Thpo	0	0	9.60864
Zkscan2	1.71278e-05	3.43287e-05	2.18352		Bckdk	5.49629e-06	1.25789e-05	1.20169		Rmnd5b	7.75901e-06	1.9736e-05	-3.87882							Thtpa	0	0	4.25455
Marchf4	1.72353e-05	3.4497e-05	-2.23427		Hnrnpll	5.67157e-06	1.29529e-05	-2.63892		Ubr4	7.80327e-06	1.9833e-05	1.1724							Timm44	0.0124119	0.0172051	2.21425
Golga7b	1.73249e-05	3.46528e-05	-1.68757		Kcnmb1	5.98948e-06	1.36362e-05	4.58401		Ctcf	7.80505e-06	1.9833e-05	1.07313							Timm50	8.74645e-09	6.07666e-08	5.77082
Pomgnt1	1.73596e-05	3.47045e-05	1.20676		Phgdh	6.04128e-06	1.37455e-05	1.37649		Efhd2	7.82994e-06	1.98861e-05	2.60479							Tinf2	0	0	6.30812
Abca5	1.74562e-05	3.4868e-05	1.62649		Ube2c	6.10955e-06	1.38893e-05	4.0265		Vmn2r-ps129	7.83779e-06	1.9901e-05	1.55292							Tipin	2.69089e-12	2.78107e-11	6.01629
Pts	1.75069e-05	3.49516e-05	-1.78563		Dnalc1	6.31242e-06	1.43117e-05	1.10637		Slc1a4	7.91358e-06	2.0073e-05	1.3282							Tjap1	9.03387e-08	5.03824e-07	5.03331
Tafa1	1.75565e-05	3.50032e-05	1.20199		Soat2	6.31689e-06	1.43189e-05	2.37909		Skic8	7.93628e-06	2.01255e-05	1.4625							Tlcd2	0.0071263	0.0104301	2.51063
Bbs2	1.75792e-05	3.50367e-05	-3.00871		Zik1	6.35908e-06	1.43996e-05	4.90189		Prpf31	7.94326e-06	2.01381e-05	1.06575							Tle1	4.02306e-12	4.09881e-11	3.33347
Shoc2	1.77676e-05	3.53644e-05	1.3763		Tspan33	6.4263e-06	1.45251e-05	1.02095		Endov	7.94777e-06	2.01444e-05	2.1382							Tle2	0	0	5.81275
Rexo2	1.78777e-05	3.55535e-05	1.68984		Prpsap1	6.66467e-06	1.50202e-05	3.63465		Zfp11	8.06378e-06	2.04126e-05	2.34251							Tm9sf1	1.51447e-18	2.32895e-17	6.60072
Hsd17b12	1.78849e-05	3.55618e-05	1.37639		Fhip2b	6.95354e-06	1.55905e-05	2.21203		Zbtb8a	8.37322e-06	2.11691e-05	2.54388							Tma16	0.00209222	0.00340261	2.36458
Tcta	1.80477e-05	3.5807e-05	2.03644		Nav2	7.06672e-06	1.58378e-05	1.21818		Gpr37	9.03329e-06	2.27745e-05	1.0249							Tmc7	1.12553e-21	2.03983e-20	6.12008
Mfge8	1.82783e-05	3.61854e-05	-2.90668		Tbc1d22a	7.08114e-06	1.58668e-05	3.50617		Naip2	9.21386e-06	2.32006e-05	1.90412							Tmcc3	5.88688e-06	1.93065e-05	3.99539
Zfp142	1.82904e-05	3.62034e-05	1.05375		Lman1	7.37045e-06	1.64644e-05	1.37984		Ino80c	9.70532e-06	2.43889e-05	2.50372							Tmed8	4.95597e-18	7.41263e-17	5.47024
Letm2	1.86433e-05	3.67705e-05	-2.45367		Gprasp2	7.78223e-06	1.72887e-05	1.96446		Ercc4	9.90275e-06	2.48663e-05	2.06458							Tmem11	0	0	7.32085
Lrrc24	1.8761e-05	3.69596e-05	-1.86047		Rcor3	7.93233e-06	1.76007e-05	2.74995		Bco1	1.01742e-05	2.55102e-05	2.38538							Stimate	0	0	2.85228
Prelid3a	1.8812e-05	3.70246e-05	-1.86853		Eif2ak2	7.95132e-06	1.76357e-05	1.95233		Siglech	1.02451e-05	2.56807e-05	6.23535							Tmem120a	0	0	2.85212
Zfp637	1.8982e-05	3.7297e-05	-1.7434		Man2a2	8.11258e-06	1.79605e-05	1.28545		Btbd6	1.02656e-05	2.57258e-05	5.29836							Tmem129	1.13452e-24	2.44189e-23	2.39692
Creg2	1.90422e-05	3.73967e-05	-2.17543		Dnmt1	8.15015e-06	1.804e-05	4.12614		Ccdc78	1.12626e-05	2.80905e-05	2.00361							Tmem132e	0	0	3.32353
Ttc19	1.95976e-05	3.82708e-05	1.27875		Cct3	8.29234e-06	1.83325e-05	1.31968		Psmc6	1.22729e-05	3.04431e-05	1.24668							Tmem143	0	0	5.27676
Diablo	1.96488e-05	3.83581e-05	2.12826		Rhbdl1	8.34856e-06	1.8453e-05	3.77494		Sec24a	1.26771e-05	3.13836e-05	5.78682							Tmem144	0.00938166	0.013383	2.42495
Kcmf1	1.97284e-05	3.84816e-05	1.20816		Caln1	8.43285e-06	1.8613e-05	1.18875		Dohh	1.28833e-05	3.18624e-05	-4.80478							Tmem175	2.47385e-12	2.566e-11	2.79709
Bend6	1.99942e-05	3.89293e-05	-1.70758		Pdzk1	8.48651e-06	1.87238e-05	1.85483		Klhl28	1.29978e-05	3.21218e-05	2.72682							Tmem176b	3.42865e-26	8.26333e-25	-4.14219
Hebp1	2.01269e-05	3.91424e-05	-2.50879		Gon4l	8.68526e-06	1.91198e-05	1.22692		Arl6ip5	1.30451e-05	3.22229e-05	-3.96663							Tmem178a	0.00015924	0.000306253	2.26764
Utp3	2.01617e-05	3.92037e-05	1.07942		Senp2	8.71584e-06	1.91794e-05	3.74751		Gpi	1.34875e-05	3.3209e-05	2.92361							Tmem185b	0.00112215	0.0019171	2.70906
Btbd1	2.02741e-05	3.93843e-05	-1.44131		Cep70	8.87782e-06	1.95083e-05	1.22562		Zfp935	1.3547e-05	3.33389e-05	2.43317							Tmem205	4.81906e-08	2.86893e-07	7.54775
Arl6ip4	2.02852e-05	3.93919e-05	-1.56893		Dusp22	9.41066e-06	2.06087e-05	4.67721		Yy1	1.36645e-05	3.36093e-05	4.44996							Tmem218	0	0	2.02231
Mapk8	2.02899e-05	3.93946e-05	1.50231		Ep300	9.47221e-06	2.0731e-05	1.87596		Plekhb1	1.36669e-05	3.36093e-05	1.89102							Tmem241	0.00342783	0.0053524	5.60427
Atad1	2.03524e-05	3.9477e-05	1.51299		Myoz3	9.4818e-06	2.07479e-05	1.1593		Slc35e3	1.36772e-05	3.36262e-05	3.667							Tmem41a	0.00713056	0.0104326	3.17239
Lrfn1	2.04376e-05	3.96097e-05	1.88271		Sc5d	9.81759e-06	2.14482e-05	3.80681		Gtf3c6	1.39962e-05	3.43599e-05	1.00096							Tmem41b	0.0156985	0.0212525	2.93015
Slc25a17	2.05255e-05	3.97533e-05	-1.36116		Uxt	1.0045e-05	2.19013e-05	2.34276		Kif11	1.50778e-05	3.69155e-05	2.19081							Tmem65	0.0116633	0.0162795	2.51426
Zxdc	2.0748e-05	4.01124e-05	2.07931		Eef1a2	1.02238e-05	2.22644e-05	1.47971		Aoc2	1.51258e-05	3.70239e-05	4.50267							Tmem86b	0	0	7.00177
Mrpl24	2.0905e-05	4.03439e-05	1.65685		Noc3l	1.02621e-05	2.23345e-05	1.96863		Wdr43	1.55719e-05	3.80321e-05	3.06649							Tmem87b	0	0	3.40711
Slc39a14	2.09853e-05	4.0465e-05	-1.66728		Kif11	1.04274e-05	2.26715e-05	1.8919		Wdr26	1.61792e-05	3.94191e-05	2.16581							Tmpo	4.28519e-05	9.86151e-05	-2.97596
Upp1	2.10414e-05	4.05534e-05	-4.50429		Slc6a1	1.05309e-05	2.28694e-05	1.93605		Gatad2b	1.62329e-05	3.95404e-05	1.21251							Tmsb10	3.29573e-06	1.1882e-05	-2.35518
Pde7b	2.13052e-05	4.09281e-05	-1.50435		Irs1	1.0765e-05	2.33358e-05	3.67936		Ai414108	1.63848e-05	3.98908e-05	2.47104							Tnik	0.00233092	0.00376069	2.23324
Eif1	2.13786e-05	4.10356e-05	1.63231		Map4k3	1.08528e-05	2.35076e-05	1.55362		Rnf139	1.66421e-05	4.04582e-05	1.10514							Tnip2	0.000950907	0.00163993	3.50723
Gpr25	2.15557e-05	4.1342e-05	-3.36168		Phf20l1	1.13379e-05	2.4471e-05	1.6161		Rapgef6	1.71806e-05	4.17165e-05	2.62069							Tnpo3	0.00066418	0.00117235	2.70329
Grm7	2.16504e-05	4.14737e-05	1.62319		Myadm	1.13714e-05	2.45336e-05	1.74606		Gm4841	1.74978e-05	4.24455e-05	2.65513							Tnrc18	0.024469	0.0318228	2.19303
Tiprl	2.16525e-05	4.14737e-05	1.07991		Porcn	1.18008e-05	2.53847e-05	2.14528		Dph6	1.7714e-05	4.29124e-05	5.52804							Tor1aip1	0.035997	0.0452358	2.04157
Dcc	2.20913e-05	4.22045e-05	-1.90919		Coq5	1.19962e-05	2.57695e-05	1.22605		Cdk5	1.79935e-05	4.35635e-05	-6.00544							Tor1aip2	0.00501741	0.00757689	2.70558
Ctss	2.23987e-05	4.26674e-05	1.21913		Anapc2	1.20221e-05	2.58149e-05	1.62901		Ptprz1	1.83242e-05	4.43211e-05	2.55749							Tor4a	1.68536e-06	6.6365e-06	-2.59081
Slc37a4	2.24513e-05	4.2751e-05	-2.30123		Tspan5	1.2049e-05	2.58678e-05	1.19032		Pogk	1.89255e-05	4.56762e-05	4.94796							Tox	2.58703e-08	1.63517e-07	-3.55096
Smc5	2.26094e-05	4.30202e-05	1.71576		Ptbp3	1.20735e-05	2.59153e-05	1.90015		Alox8	1.90997e-05	4.60632e-05	1.59748							Tox3	0.000125078	0.000246376	-3.99281
Gad1	2.26666e-05	4.31152e-05	-1.39729		Lrrc2	1.22952e-05	2.63652e-05	2.47559		Kifap3	1.93e-05	4.65237e-05	1.19402							Tpcn1	0.00330456	0.00517612	5.09884
Eeig1	2.27283e-05	4.31906e-05	1.08063		Gm12360	1.2725e-05	2.72387e-05	5.04251		Abcd3	1.96037e-05	4.72216e-05	1.5787							Tpra1	3.62779e-24	7.41854e-23	2.21188
Dock4	2.29466e-05	4.35704e-05	1.38802		Fbxl17	1.32331e-05	2.82431e-05	1.78574		Ackr1	1.98318e-05	4.77367e-05	1.87669							Trabd	0	0	2.16059
Olfml2b	2.299e-05	4.36317e-05	-2.67472		Pi15	1.35899e-05	2.89652e-05	1.33843		Tcf7l2	2.0211e-05	4.85624e-05	3.67908							Traf3ip1	2.88222e-06	1.05841e-05	8.51224
Wdr5	2.4199e-05	4.55092e-05	-1.82665		Ctcfl	1.37802e-05	2.93534e-05	1.34078		Upf3b	2.03452e-05	4.88432e-05	3.3387							Traf6	4.21256e-07	1.97976e-06	4.80858
Zfp655	2.4335e-05	4.57211e-05	1.51702		Prdm2	1.39363e-05	2.96513e-05	1.79317		Kcnv1	2.0863e-05	5.00261e-05	2.85616							Traf7	8.35038e-09	5.83763e-08	2.16263
Mafg	2.46495e-05	4.62384e-05	2.02588		Acer1	1.39406e-05	2.96546e-05	1.7844		B4galnt2	2.1516e-05	5.14562e-05	1.71898							Trappc5	0.0118601	0.01652	2.39574
Letmd1	2.49852e-05	4.67269e-05	1.66355		Rnf150	1.39523e-05	2.96738e-05	3.30238		Tmem88b	2.16856e-05	5.18124e-05	4.88266							Trerf1	0.00480558	0.00728939	2.88897
Gna13	2.52665e-05	4.71336e-05	-1.15117		Tac1	1.43147e-05	3.0352e-05	3.37676		Grk1	2.21286e-05	5.27824e-05	2.64371							Trib1	0	0	2.07701
Rab5a	2.52963e-05	4.71804e-05	1.59241		Clasp1	1.43157e-05	3.0352e-05	1.44171		S1pr4	2.245e-05	5.34852e-05	1.11876							Tril	4.33981e-23	8.3534e-22	-4.01444
Mgst3	2.59206e-05	4.80759e-05	-2.07364		Rfxank	1.5217e-05	3.21693e-05	1.98878		Ptcra	2.3264e-05	5.53455e-05	5.71697							Trim11	0.0077371	0.0112227	2.42069
Clmn	2.59581e-05	4.81268e-05	-1.48343		Mob3c	1.53503e-05	3.24386e-05	3.56547		Pou3f2	2.34401e-05	5.56982e-05	3.49032							Trim12c	0.000455165	0.000824124	-2.13787
Gpat4	2.60433e-05	4.82697e-05	1.23782		Kmt5b	1.53832e-05	3.25017e-05	1.36675		Galc	2.41566e-05	5.72917e-05	2.52133							Trio	0.000451817	0.000818451	2.3175
Adck1	2.60671e-05	4.83062e-05	-2.32581		Zbtb1	1.54073e-05	3.25464e-05	5.79681		Fstl1	2.44592e-05	5.79407e-05	1.88845							Trmt10c	4.20512e-12	4.28049e-11	2.11684
Morc2a	2.61257e-05	4.84072e-05	1.11293		Ndufaf4	1.55143e-05	3.27534e-05	1.11596		Rbm15	2.54322e-05	6.01601e-05	1.95225							Trmt11	0	0	4.61803
Lamp2	2.64327e-05	4.88763e-05	1.06638		Zfp874a	1.56298e-05	3.29718e-05	2.95745		Krr1	2.80378e-05	6.59803e-05	3.0348							Trmt61a	6.22133e-09	4.4385e-08	4.19987
Arl5a	2.69193e-05	4.96128e-05	1.25073		Ttc19	1.59441e-05	3.36087e-05	1.22955		B3glct	2.88207e-05	6.77269e-05	1.66483							Trp53inp1	0	0	5.7443
Inpp5f	2.69446e-05	4.96421e-05	1.77548		Rnd3	1.62073e-05	3.41373e-05	2.01188		Paxip1	2.92799e-05	6.87576e-05	5.04315							Trp53rk	0	0	5.04406
Nup42	2.69478e-05	4.96421e-05	-4.00866		Cul1	1.63946e-05	3.45051e-05	1.69454		Gm19619	2.94632e-05	6.91672e-05	1.61065							Trpc2	0	0	5.45448
Mrpl30	2.6981e-05	4.968e-05	1.05441		Rnmt	1.6777e-05	3.52624e-05	2.02016		Cpeb3	2.94682e-05	6.91672e-05	1.75195							Trpc5	0.0295257	0.0378135	2.67172
Sox8	2.70126e-05	4.97071e-05	-3.28769		Mir22hg	1.67942e-05	3.52917e-05	2.83498		Psd3	3.00411e-05	7.04459e-05	1.13539							Trpv2	2.01362e-13	2.2603e-12	4.54891
Baz2b	2.70498e-05	4.97601e-05	1.16336		Fam161b	1.70807e-05	3.58455e-05	1.46146		Nfat5	3.07796e-05	7.20593e-05	3.06251							Tsc2	0.00050052	0.000901408	2.16754
Chid1	2.72647e-05	5.00539e-05	-1.13157		Mcmdc2	1.72059e-05	3.60805e-05	1.9331		Zfp941	3.13725e-05	7.33615e-05	3.22868							Tshz2	4.2976e-21	7.48135e-20	-3.49238
Msmo1	2.73273e-05	5.01533e-05	1.24885		Hspa4	1.77739e-05	3.71575e-05	1.44468		Zfp110	3.14134e-05	7.34398e-05	4.69395							Tspyl5	5.32792e-05	0.00011761	3.34868
Man1c1	2.73836e-05	5.02437e-05	-2.19073		Ice2	1.79557e-05	3.75159e-05	3.1711		Il18	3.14704e-05	7.35559e-05	5.13104							Tssc4	8.04906e-42	1.31913e-39	2.07536
Mbd3	2.73919e-05	5.02482e-05	1.25541		Uba2	1.80767e-05	3.77471e-05	1.60534		Shc4	3.19656e-05	7.45914e-05	4.0274							Ttc1	0.00194789	0.0031873	2.39752
Slc11a2	2.7479e-05	5.03768e-05	1.52092		Rspry1	1.85137e-05	3.85858e-05	2.15452		Klf3	3.20529e-05	7.47602e-05	3.12576							Ttc13	1.59644e-24	3.38528e-23	5.19357
Clip2	2.75667e-05	5.05139e-05	-1.86974		Zfp747	1.85414e-05	3.86289e-05	5.32358		Usp14	3.35901e-05	7.81268e-05	1.50816							Ift70b	1.66885e-11	1.6129e-10	6.26078
Xpot	2.76579e-05	5.06417e-05	1.61923		Tnik	1.89196e-05	3.93566e-05	2.29644		Nol9	3.46145e-05	8.02854e-05	4.9812							Ttc39c	0.00324457	0.0050884	3.44913
Parva	2.76738e-05	5.06551e-05	-1.58349		Arfgap2	1.93148e-05	4.01176e-05	1.38026		Dda1	3.47514e-05	8.05842e-05	1.73293							Ttc5	0.000659141	0.00116459	3.17326
Arr3	2.77202e-05	5.07086e-05	4.7223		Ripply3	1.99905e-05	4.14344e-05	1.40919		Eif4ebp2	3.50856e-05	8.12839e-05	1.79638							Tti1	9.07526e-35	4.4492e-33	7.62557
Eme2	2.77879e-05	5.08088e-05	1.16902		Ptpn18	2.0068e-05	4.15791e-05	1.037		Ppfia4	3.52283e-05	8.15955e-05	1.42081							Ttll12	0	0	7.65536
Tmx1	2.78211e-05	5.08459e-05	1.28894		Cybrd1	2.05464e-05	4.25059e-05	1.15004		Lgals8	3.52753e-05	8.16665e-05	1.32887							Ttll10	0.00529869	0.00796991	2.68773
Ago4	2.81302e-05	5.12916e-05	-2.46888		Zfp932	2.10337e-05	4.34399e-05	1.58112		Znf638	3.53075e-05	8.17222e-05	1.40717							Ttpal	0.00944466	0.0134645	2.61603
Lrrc41	2.89758e-05	5.25654e-05	1.02938		Rsph9	2.11286e-05	4.36277e-05	1.40772		Psmd6	3.63727e-05	8.41287e-05	1.21221							Tulp3	7.84638e-06	2.45603e-05	5.23609
Srpra	2.93171e-05	5.30867e-05	1.31952		Slc25a18	2.14581e-05	4.42912e-05	2.8649		Nifk	3.66954e-05	8.47581e-05	1.39298							Twf2	1.25502e-10	1.11179e-09	4.0238
Stk32c	2.93273e-05	5.30889e-05	-4.0781		Pxdn	2.15153e-05	4.4401e-05	1.45509		Ckap5	3.74171e-05	8.63251e-05	2.59474							Txnrd2	0.00131327	0.00222073	2.57491
Epg5	2.93498e-05	5.31132e-05	1.04245		Idua	2.16866e-05	4.47119e-05	5.60105		Ptpn2	3.76464e-05	8.68341e-05	3.46429							Ube2l3	2.78726e-05	6.91582e-05	2.12202
Cyp51a1	2.93869e-05	5.31723e-05	1.40653		Arfip2	2.21243e-05	4.55544e-05	1.33539		Tmppe	3.77552e-05	8.70651e-05	1.39845							Ubox5	0.00511485	0.00771769	3.65415
Ust	2.94706e-05	5.32827e-05	-1.57665		Letm1	2.2385e-05	4.60565e-05	1.17676		Asnsd1	3.79366e-05	8.74228e-05	4.04733							Ubxn11	0.0240498	0.0313343	3.00339
Mthfd1l	2.97589e-05	5.37464e-05	3.41029		Fyn	2.25435e-05	4.63739e-05	1.5109		Ro60	3.94243e-05	9.0684e-05	1.17463							Uck2	0	0	2.39886
Avl9	2.99276e-05	5.39662e-05	2.39132		Cramp1	2.26019e-05	4.64766e-05	2.12771		Sbds	3.95057e-05	9.08505e-05	1.56409							Uggt2	0.0184761	0.0246091	2.88902
Ftsj3	2.99995e-05	5.40652e-05	1.42035		Xkr8	2.28559e-05	4.69457e-05	1.50511		Erc1	4.26511e-05	9.77465e-05	1.95976							Uhmk1	1.67599e-07	8.74748e-07	6.60406
Rnaseh1p1	3.00271e-05	5.40982e-05	1.12289		Kdm5b	2.30546e-05	4.7336e-05	1.31112		Lrrc4c	4.30793e-05	9.86826e-05	3.10881							Ulk1	0	0	5.36273
Xab2	3.1038e-05	5.56308e-05	1.02132		Smurf1	2.4086e-05	4.92501e-05	4.2767		Chordc1	4.36241e-05	9.98392e-05	1.88533							Ulk4	0	0	3.83449
Mrps22	3.105e-05	5.56439e-05	1.53916		Aarsd1	2.4242e-05	4.95504e-05	1.43932		Camk4	4.3877e-05	0.000100372	1.10353							Unc13b	0.000799383	0.00139454	3.66047
Vps26a	3.11355e-05	5.57717e-05	1.01833		Ift46	2.46271e-05	5.0253e-05	1.28926		Vmp1	4.48382e-05	0.000102407	1.0642							Unc45a	0	0	6.4795
Nudt10	3.13714e-05	5.61007e-05	-2.07861		B9d2	2.5065e-05	5.1051e-05	1.73812		Kcnd3	4.48505e-05	0.000102411	1.71945							Unc5b	0.00879439	0.0126114	-3.90207
Sec24b	3.16288e-05	5.64752e-05	1.34692		Wdr33	2.59146e-05	5.26636e-05	1.12236		Il18r1	4.6038e-05	0.000104979	2.36879							Urb1	0	0	5.17436
Supt16	3.18732e-05	5.68342e-05	1.07936		Fam171a1	2.63574e-05	5.35136e-05	1.06892		Tmem35a	4.62273e-05	0.000105387	1.06267							Urgcp	0.00976743	0.0138558	2.42879
Fam131b	3.24694e-05	5.7662e-05	-1.81007		Agpat4	2.67929e-05	5.43069e-05	1.02873		Bc005537	4.69668e-05	0.000106951	1.54865							Usp20	0.00126769	0.00214529	2.06616
Ssx2ip	3.26741e-05	5.79644e-05	1.11379		Ppargc1a	2.73741e-05	5.53822e-05	1.01739		Gabrg1	4.72727e-05	0.000107598	3.99695							Usp24	0.00209762	0.00340993	3.89858
Anxa7	3.30355e-05	5.84738e-05	1.49828		Snf8	2.74557e-05	5.55369e-05	2.50198		Cab39	4.74918e-05	0.000108072	1.96142							Usp28	0.0291707	0.037399	2.68926
Gfm2	3.30448e-05	5.84814e-05	1.02938		Herc2	2.76002e-05	5.57983e-05	2.14465		Sfxn3	4.79401e-05	0.00010898	1.55597							Usp3	1.01239e-11	1.00122e-10	5.74675
Spg21	3.32253e-05	5.87217e-05	1.48086		Suv39h1	2.80811e-05	5.67075e-05	3.29092		Zfp330	4.82008e-05	0.000109472	2.17592							Usp39	8.7705e-27	2.18254e-25	2.23581
Dot1l	3.42034e-05	6.01259e-05	1.19497		Pak1ip1	2.81008e-05	5.67158e-05	1.14457		Pik3c2a	4.93185e-05	0.000111873	1.58275							Usp40	8.13392e-05	0.000168799	2.81201
Ube3c	3.42895e-05	6.02325e-05	1.36083		Qser1	2.92573e-05	5.89301e-05	4.77478		Soat2	5.12291e-05	0.000115865	2.44542							Usp53	0	0	2.74114
Tbrg4	3.431e-05	6.02595e-05	1.17246		Ankzf1	3.01357e-05	6.05765e-05	2.38287		Zfp689	5.12725e-05	0.000115937	3.04381							Utp11	5.76208e-12	5.79848e-11	2.31943
Necab3	3.49169e-05	6.10801e-05	1.71734		Slc30a7	3.06231e-05	6.14771e-05	1.26398		Gm9159	5.18749e-05	0.00011722	1.24869							Utp14b	0	0	2.85443
Cpsf1	3.49702e-05	6.1128e-05	1.23009		Slc19a2	3.06616e-05	6.15317e-05	1.05721		Ndufaf4	5.29795e-05	0.000119635	2.82886							Uty	0.00585171	0.00872962	2.86193
Med10	3.53158e-05	6.16133e-05	1.1181		Ank1	3.13553e-05	6.27738e-05	1.68414		Grik5	5.38698e-05	0.00012148	3.30901							Uxt	0	0	7.22521
Enah	3.57445e-05	6.22509e-05	1.23169		Kbtbd2	3.14919e-05	6.30357e-05	1.61478		Spc24	5.38897e-05	0.000121498	2.29624							Vangl2	0	0	8.14888
Zfp239	3.62231e-05	6.2935e-05	-2.34133		Bace1	3.17105e-05	6.34269e-05	1.22512		Gas2l3	5.41685e-05	0.000122099	3.98299							Vars1	0	0	4.60044
Pcgf6	3.62975e-05	6.30278e-05	1.08439		Myo18a	3.18603e-05	6.37032e-05	1.43764		Vim	5.42312e-05	0.000122199	1.98995							Vars1	2.52234e-43	8.03785e-41	3.43267
Ddx27	3.66303e-05	6.34373e-05	1.89482		Poglut3	3.2457e-05	6.47759e-05	1.38841		Fam107a	5.512e-05	0.000124129	7.35471							Vav3	0.00194672	0.00318585	3.15427
Neurl4	3.67689e-05	6.36339e-05	1.24975		Lrrc8a	3.26302e-05	6.50876e-05	1.09035		Mtdh	5.5475e-05	0.000124847	1.11621							Vcl	1.35339e-06	5.49984e-06	2.92218
Mef2d	3.76071e-05	6.48153e-05	-2.04143		Asb7	3.30617e-05	6.58641e-05	5.16491		Sox2	5.99472e-05	0.000134518	3.91252							Vipr1	0	0	5.32056
Slc26a4	3.82924e-05	6.57946e-05	1.13347		Zfp180	3.32313e-05	6.61898e-05	3.24821		Tbc1d10b	6.0954e-05	0.000136716	1.14383							Vmac	6.85784e-23	1.30904e-21	-4.91158
Pik3ip1	3.84292e-05	6.59913e-05	-3.51943		Ppp4r4	3.42759e-05	6.80965e-05	3.85754		Glyr1	6.16636e-05	0.000138183	1.62341							Vmn2r29	0	0	4.53121
Rabgef1	3.91945e-05	6.70675e-05	1.15691		Cfl2	3.51199e-05	6.96972e-05	1.9533		Cracr2b	6.19332e-05	0.000138757	2.44902							Vps13c	3.67169e-19	5.86652e-18	2.90176
Zfp263	3.9198e-05	6.70675e-05	1.31607		Npas3	3.56357e-05	7.06439e-05	3.21213		Cacnb3	6.22517e-05	0.000139439	1.14698							Vps26b	0.000220657	0.000415049	2.78907
Bmpr1a	3.94057e-05	6.73739e-05	1.54948		Cpeb4	3.60992e-05	7.14978e-05	1.95765		Fn3krp	6.27769e-05	0.000140552	-6.85386							Vps4b	0.00687858	0.0101026	2.25788
Hycc1	3.94734e-05	6.74702e-05	-3.29338		Cracr2b	3.62593e-05	7.17757e-05	1.85802		Wwp1	6.59646e-05	0.000147261	1.57002							Vps54	0.00242617	0.00390202	2.52954
Gdap2	4.00081e-05	6.82063e-05	1.19123		Galns	3.70556e-05	7.33122e-05	3.24153		Commd7	6.66039e-05	0.000148655	1.50737							Vps8	0.00834887	0.0120279	4.47928
Dnajb4	4.0331e-05	6.8618e-05	1.21567		Lrrc45	3.71957e-05	7.35495e-05	3.69479		Mxi1	6.79042e-05	0.00015138	-4.07165							Vti1a	1.06604e-07	5.83577e-07	3.60535
Aldh1a1	4.08065e-05	6.9297e-05	5.17021		Csnk2a2	3.83637e-05	7.57081e-05	3.95734		Elovl7	6.79159e-05	0.00015138	3.84519							Was	3.43323e-05	8.21056e-05	-2.13598
Lnpk	4.08933e-05	6.94244e-05	1.64582		Tpd52	3.87093e-05	7.6335e-05	2.21931		Lsm3	6.80906e-05	0.000151736	4.31009							Wasf2	0.0223492	0.0293017	2.30195
Ap3m1	4.12762e-05	7.0004e-05	1.01436		Gsg1l	3.88586e-05	7.66155e-05	1.80111		Hif1an	6.89091e-05	0.000153423	1.64612							Kmt2b	0.0012148	0.00206432	2.13123
Ppfibp1	4.17179e-05	7.05908e-05	-2.55567		Ptpa	3.92952e-05	7.74065e-05	1.28634		Gm10336	7.03578e-05	0.000156439	5.80096							Bud23	0.000694255	0.00122211	2.11637
Paip2b	4.27931e-05	7.20691e-05	1.4745		Au023762	3.95316e-05	7.783e-05	4.4729		Usp47	7.20983e-05	0.000160025	4.69253							Phip	0.000329387	0.00060761	4.70039
Impa1	4.28098e-05	7.20869e-05	-1.1287		Sec23b	3.9573e-05	7.78976e-05	1.73067		Gm8234	7.22453e-05	0.00016028	1.50568							Wdr46	2.92174e-12	3.01152e-11	5.97087
Zfp280c	4.2885e-05	7.21517e-05	1.68471		Pex11b	4.07856e-05	8.01255e-05	1.65066		Smyd4	7.27391e-05	0.000161268	4.46273							Wdr55	0	0	6.46716
Shank2	4.31863e-05	7.25758e-05	1.20696		Ttbk2	4.09772e-05	8.0473e-05	1.47109		Akap1	7.27714e-05	0.000161304	1.54306							Tbc1d31	0	0	6.41058
Slc46a3	4.32272e-05	7.26343e-05	1.91522		Stim1	4.17712e-05	8.19439e-05	4.69619		Il11	7.43348e-05	0.00016466	3.02537							Wdr75	2.53902e-07	1.26367e-06	3.91315
Exosc3	4.33236e-05	7.27652e-05	-1.45474		Ralgapa2	4.20118e-05	8.23862e-05	1.6908		Chst3	7.87321e-05	0.000173976	2.53303							Wrap73	0.00280114	0.00445079	2.756
Gnaz	4.44085e-05	7.42807e-05	-2.01563		Mogat3	4.23584e-05	8.30064e-05	1.8375		Magi2	8.42272e-05	0.000185545	3.94763							Wee1	0	0	3.97767
Prox2	4.49365e-05	7.50003e-05	-1.12497		Spg7	4.24415e-05	8.31432e-05	1.75108		Ccnd2	8.45789e-05	0.000186279	1.39757							Wfs1	0.000282034	0.000524646	-2.78773
C1qb	4.50459e-05	7.51338e-05	1.62796		Sema6d	4.28791e-05	8.39214e-05	1.54394		Ash2l	8.89866e-05	0.000195728	-4.9004							Whamm	0.000219383	0.000412854	6.35364
Acadsb	4.5121e-05	7.52191e-05	1.98308		Cnot1	4.45299e-05	8.69341e-05	1.47307		Fbxo43	9.09722e-05	0.000199831	1.30254							Nsd2	0.0068263	0.0100348	2.05444
Sardh	4.57091e-05	7.60573e-05	1.1861		Tmem82	4.49662e-05	8.77073e-05	3.42475		Sik3	9.15244e-05	0.000201	1.31496							Nsd3	0.000222458	0.000418229	2.59215
Adap1	4.70328e-05	7.79192e-05	-1.10183		Ubfd1	4.53263e-05	8.83151e-05	1.75919		Mgll	9.18012e-05	0.000201564	2.41243							Wipf1	0	0	3.68953
Nfs1	4.70715e-05	7.79614e-05	-2.07715		Pdcd6	4.59626e-05	8.94591e-05	1.67373		Gls2	9.96469e-05	0.00021805	5.55162							Wipi2	0.000322523	0.000595426	2.75826
Mtg1	4.70959e-05	7.79892e-05	-1.10587		Pot1b	4.60382e-05	8.95744e-05	2.32959		Rnf41	0.000102196	0.00022321	1.06279							Wls	0.012719	0.0175961	2.40621
Dnajc16	4.76531e-05	7.86926e-05	-2.3567		Lmna	4.61783e-05	8.97988e-05	1.42032		Prlr	0.000105701	0.000230613	4.17872							Wnt2b	0	0	3.07682
M6pr	4.8083e-05	7.93027e-05	1.30736		Farsb	4.63766e-05	9.01622e-05	3.2216		Plek	0.00010578	0.000230736	5.53506							Wsb1	6.73992e-30	2.1011e-28	2.79272
Pnpt1	4.81553e-05	7.93775e-05	1.22593		Sh3bp5l	4.64367e-05	9.02371e-05	1.64901		Rrp1b	0.000109911	0.000239538	6.28664							Wtip	0	0	3.25989
Ssh2	4.8401e-05	7.96823e-05	-1.09702		Abcc5	4.65648e-05	9.04649e-05	1.24313		Tlcd5	0.000110105	0.000239908	1.95518							Wwp2	0.0234427	0.0306014	2.18418
Acan	4.86476e-05	8.00101e-05	4.92316		Ralyl	4.65921e-05	9.04907e-05	-5.08939		Rbm48	0.000113725	0.000247526	1.23182							Xaf1	1.66697e-11	1.61243e-10	-4.68754
Ccng1	4.90266e-05	8.04877e-05	1.20814		S100b	4.77973e-05	9.25846e-05	2.1603		Klhl4	0.000114188	0.000248265	1.71467							Xist	7.71382e-06	2.42181e-05	6.42785
Fosb	5.03602e-05	8.23447e-05	2.60859		Kcnj15	4.93286e-05	9.53139e-05	1.538		Pcif1	0.000116359	0.000252709	-3.10572							Xkrx	0.000259415	0.000483983	-3.30787
Tpra1	5.04667e-05	8.24823e-05	1.40685		E2f1	5.05341e-05	9.74536e-05	1.85421		Bc033916	0.000120096	0.000260599	1.08213							Xpa	0.00141144	0.00236933	3.21132
Capn5	5.04793e-05	8.24823e-05	-2.67347		Ccdc107	5.0986e-05	9.82557e-05	1.54009		Syt15	0.000120548	0.000261522	2.73945							Xrcc4	0	0	6.40836
Hif1an	5.13944e-05	8.37354e-05	1.0135		Stk16	5.11334e-05	9.84875e-05	2.14423		E4f1	0.000123282	0.000267107	1.64503							Xrcc6	0	0	4.57476
Katnb1	5.27485e-05	8.54427e-05	1.31476		Fam219a	5.14859e-05	9.90779e-05	3.15154		Aco1	0.000123534	0.000267596	4.54214							Xrn1	1.06648e-07	5.83577e-07	2.30408
C1qc	5.35766e-05	8.65841e-05	1.47056		Oxld1	5.15034e-05	9.90779e-05	2.63575		Actn2	0.000125306	0.000271257	3.36478							Yap1	0.000153335	0.000295939	-4.19118
Mrps31	5.40054e-05	8.71338e-05	1.1029		Tnfrsf11a	5.18165e-05	9.96449e-05	2.48104		Srrm4	0.000125819	0.000272309	1.45689							Ybx2	0	0	3.95824
Megf11	5.467e-05	8.79776e-05	2.68067		D3ertd254e	5.21808e-05	0.000100275	3.13456		Gm4285	0.000126036	0.00027272	1.74542							Yes1	0	0	5.57426
Slc35f6	5.50261e-05	8.84661e-05	1.20174		Alox12	5.25115e-05	0.000100875	1.79314		Smad7	0.000127731	0.000276267	4.85766							Yipf2	0.0285839	0.0367287	3.54085
Adra1d	5.50634e-05	8.85019e-05	-2.38804		Mettl16	5.29611e-05	0.000101685	1.96823		Smarca5	0.000131565	0.000284312	1.31206							Ypel1	0.00558015	0.00836148	3.76321
Lsm12	5.53343e-05	8.88057e-05	1.35132		C1qc	5.40088e-05	0.000103551	1.89699		Snai2	0.00013267	0.000286577	2.18871							Ypel4	0.000329868	0.0006084	3.45683
Aff1	5.60529e-05	8.98965e-05	1.43002		Rad50	5.49215e-05	0.000105116	1.23725		Rbms3	0.000134523	0.000290391	4.80313							Yrdc	0	0	2.97029
Ica1l	5.64188e-05	9.04095e-05	1.02304		Sertm1	5.50472e-05	0.000105293	1.38374		Au023762	0.000134761	0.000290844	1.24853							Ptgr3	1.55511e-05	4.26291e-05	3.98175
Cul4b	5.66511e-05	9.07448e-05	1.44777		Sgpp2	5.53408e-05	0.00010577	1.6886		Vps37a	0.00013707	0.000295571	2.06526							Zbed4	0	0	9.15502
Rasl11b	5.72523e-05	9.15283e-05	1.54835		Gt(rosa)26sor	5.57563e-05	0.000106471	1.78496		Neurl4	0.000137772	0.00029702	2.44667							Zbtb16	0.00220026	0.00356668	2.30211
Vrk3	5.79638e-05	9.24585e-05	-1.36282		Tbc1d10b	5.62432e-05	0.000107345	1.1588		Crtc3	0.000143311	0.00030823	3.55732							Zbtb17	3.6183e-19	5.78928e-18	3.28828
Acvr1	5.81982e-05	9.27822e-05	1.65877		Gm20300	5.90854e-05	0.000112514	2.35112		Mphosph6	0.000146557	0.000314875	4.63062							Zbtb26	0	0	5.29342
Rprd1b	5.86496e-05	9.34008e-05	1.48011		Atad3a	5.95715e-05	0.00011338	1.21243		Nol10	0.000150035	0.000322	4.08146							Zbtb43	0.00474896	0.00721017	3.65691
Sdc4	5.91282e-05	9.3998e-05	-1.5657		Eloa	6.17835e-05	0.000117263	4.89525		Afg3l1p	0.000152222	0.000326413	1.48809							Zc3h12a	8.14895e-06	2.53209e-05	-2.57163
Cemip2	5.9737e-05	9.48509e-05	1.96501		Pdia5	6.20711e-05	0.000117707	2.39311		Etfb	0.00016011	0.000342594	1.29993							Zc3h12c	0	0	3.43163
Gyg1	5.98907e-05	9.50566e-05	-2.54952		Tigd3	6.28551e-05	0.000119048	2.86638		Gm10390	0.000160885	0.000344179	6.0886							Zc3h3	2.19057e-06	8.32402e-06	4.09155
Kcns2	6.01538e-05	9.53844e-05	1.73436		Actn4	6.3608e-05	0.00012037	2.31176		Invs	0.000165417	0.000353572	3.37351							Zc3h6	0.0385779	0.048236	2.19102
Ccdc28b	6.09861e-05	9.6411e-05	-1.62024		Tsr3	6.45109e-05	0.000121994	2.20484		Kctd12b	0.000165863	0.000354449	4.80477							Zc3h7b	0.00835986	0.0120422	3.04666
Magee2	6.10223e-05	9.64503e-05	-2.58673		Yaf2	6.45478e-05	0.000122043	1.6294		Alox12	0.000167413	0.000357683	2.20635							Zc3h8	0	0	4.28225
Btg2	6.1257e-05	9.67436e-05	1.46229		Acnat1	6.46275e-05	0.000122172	2.04557		Rsf1	0.000168429	0.000359701	2.74155							Zc3hav1l	1.1548e-28	3.28731e-27	-2.38924
Cx3cr1	6.34571e-05	9.97376e-05	1.65944		Foxl1	6.57166e-05	0.000124081	1.48682		Itgb3	0.000169742	0.00036235	5.27153							Zdhhc15	0	0	2.56255
Smim10l2a	6.35176e-05	9.97929e-05	-3.25053		Fnbp1	6.7892e-05	0.000127945	2.97281		Acap2	0.00017295	0.000368962	1.94942							Zdhhc7	0.00215859	0.00350309	2.03787
Epha10	6.37455e-05	0.000100111	2.36455		Rab3gap1	6.90258e-05	0.000129947	2.38859		Ppp1cc	0.000176531	0.000376442	2.2755							Zfat	0	0	3.72678
Golga5	6.58573e-05	0.000102784	1.40683		Mpp2	6.96967e-05	0.000131142	1.31582		Scd3	0.000178978	0.000381497	1.3401							Zfhx3	9.21494e-05	0.000187735	-2.04592
Klhl42	6.61789e-05	0.000103191	-1.97635		Syt12	7.04491e-05	0.000132444	2.12412		Skic2	0.000185224	0.000394725	6.28028							Zfp101	0	0	4.27573
Pitrm1	6.81149e-05	0.000105679	1.33233		Tmem143	7.09026e-05	0.000133205	3.55851		Tmem248	0.000186639	0.000397571	1.18315							Zfp143	0.000175625	0.000335794	-3.8787
Ahsa2p	6.8761e-05	0.000106443	1.50682		Zfp810	7.1421e-05	0.000134086	5.46243		Abcf1	0.000189811	0.000403683	3.0746							Zfp235	4.90894e-17	6.9014e-16	-4.2091
Ddx52	6.91908e-05	0.000107039	1.52497		Ryr3	7.22359e-05	0.000135476	1.04853		Zfp35	0.000189831	0.000403683	4.30332							Zfp263	4.73279e-37	2.9997e-35	5.29133
Slc6a1	7.119e-05	0.000109671	-2.03269		Riok1	7.32615e-05	0.000137329	3.76548		Decr2	0.000191506	0.000407158	1.47212							Zfp27	0	0	4.4195
Cbr4	7.20572e-05	0.000110805	-2.06933		Baz2b	7.44372e-05	0.000139415	3.45702		Txndc11	0.000196504	0.000417607	2.31462							Zfp280b	0	0	5.11561
Atg2b	7.22746e-05	0.000111066	1.44773		Prkag3	7.5596e-05	0.000141492	2.10058		Dars1	0.00019781	0.000420205	1.06265							Zfp280d	7.06651e-15	8.75453e-14	2.14464
Slc1a3	7.40167e-05	0.000113492	-3.40479		Ppp4r3b	7.58651e-05	0.000141941	1.60318		Hectd1	0.000204089	0.000433359	1.82316							Zfp317	0.0218106	0.0286709	2.33525
Sirt7	7.53741e-05	0.000115259	1.06225		Mysm1	7.68668e-05	0.000143717	2.85154		Mtss1	0.000209486	0.000444441	2.90671							Zfp354a	0	0	2.90675
Rfx7	7.59925e-05	0.000116114	1.26739		Gm16287	7.9661e-05	0.00014856	1.40308		Zfp202	0.000209697	0.000444794	3.92654							Zfp358	7.25438e-06	2.30533e-05	5.09412
Tmem62	7.61017e-05	0.000116266	-3.13186		Bc068157	8.21873e-05	0.00015301	1.08965		Trappc6b	0.000214406	0.000454589	1.23111							Zfp39	0	0	2.69237
Zfp354c	7.61218e-05	0.000116282	1.10389		Pofut1	8.87592e-05	0.000164404	5.62057		Mylk4	0.000215524	0.000456769	1.88755							Zfp407	0	0	3.4407
Efna5	7.61621e-05	0.000116313	5.14296		Armcx4	8.92737e-05	0.000165251	1.43715		Cdk12	0.000215525	0.000456769	4.59124							Zfp422	0.0283719	0.036485	2.50417
Zfand2a	7.72508e-05	0.000117757	1.6391		Map3k10	9.02017e-05	0.000166821	4.31977		Cyb5r3	0.000218564	0.000463013	1.63038							Zfp433	0.00202895	0.00330826	3.91084
Flrt1	7.74836e-05	0.000118041	-1.65467		Mdm2	9.44863e-05	0.000174126	1.71297		Adcy5	0.000219534	0.00046497	4.51733							Zfp446	0.022662	0.0296813	2.51199
Gsr	7.76528e-05	0.000118253	1.50369		Bcl2l13	9.49471e-05	0.000174857	4.54615		Thumpd3	0.000219879	0.000465601	-10.6225							Zfp449	0	0	4.89095
Mtmr7	7.84026e-05	0.000119241	1.19691		Gm3893	9.56392e-05	0.000176042	1.11203		Tnrc6a	0.000220798	0.000467448	1.30541							Zfp458	1.93136e-26	4.7343e-25	4.59223
Elovl6	7.86448e-05	0.000119526	1.2003		Xrn1	9.68238e-05	0.000178073	4.19535		Commd6	0.000222208	0.000470334	2.8349							Zfp46	2.38643e-10	2.0385e-09	8.37317
Grk6	7.86609e-05	0.000119526	1.3197		Bc021785	9.7083e-05	0.00017852	1.52481		Timm17b	0.000222388	0.000470615	1.5452							Zfp513	0.0107113	0.0150865	3.42772
Terf2	8.00887e-05	0.000121349	2.43029		Fadd	9.96065e-05	0.000182698	1.63368		Ildr2	0.000228361	0.000482948	1.84961							Zfp532	0.0197893	0.0262	2.30759
C2cd4a	8.06426e-05	0.000122002	1.29388		Ric8b	0.000101975	0.000186792	1.85484		Foxp1	0.000235626	0.000497997	2.42911							Zfp551	1.23138e-06	5.06503e-06	-4.11307
Man2a1	8.12372e-05	0.000122761	1.53917		Itpripl1	0.00010748	0.000196348	4.08345		Gm7120	0.000241359	0.000509791	4.81841							Zfp566	2.45396e-22	4.60751e-21	3.57802
Nipa2	8.13606e-05	0.000122932	1.38987		Kansl1	0.00010826	0.000197612	1.63856		Synj1	0.000242764	0.000512542	1.46782							Zfp57	7.66025e-16	9.94099e-15	4.95757
Cep350	8.15257e-05	0.000123164	2.13107		Mlst8	0.000108308	0.000197662	1.82369		Ciapin1	0.000248085	0.000523223	3.56633							Zfp583	0	0	3.82599
Pdgfa	8.19465e-05	0.000123722	1.09516		Slc6a18	0.000109062	0.000198972	1.52903		Gdap10	0.00025941	0.000546532	2.10754							Zfp592	5.17814e-10	4.30149e-09	3.51206
H1-10	8.65928e-05	0.000129609	-1.07504		Gpat4	0.000109665	0.00020004	1.35335		Pcp4l1	0.000260011	0.000547683	2.92244							Zfp60	4.52171e-17	6.38045e-16	2.08746
Snrnp48	8.66602e-05	0.000129694	2.17966		Hexb	0.000114324	0.000208043	1.76382		Pck2	0.000266166	0.000560294	5.4971							Zfp605	1.4721e-05	4.08317e-05	-2.49389
Pes1	8.78106e-05	0.000131182	1.19595		Hmgcs1	0.000116106	0.000211082	2.23721		Zfp281	0.000266416	0.000560703	1.63428							Zfp61	4.30315e-05	9.89492e-05	3.17906
Prkcd	8.95188e-05	0.000133531	6.48858		Carmil1	0.000117862	0.000214097	2.60276		Ldlrad2	0.000270098	0.000568212	1.98185							Zfp62	2.41983e-06	9.08685e-06	3.14095
Laptm5	9.08512e-05	0.000135244	1.41629		Dennd6a	0.00011823	0.00021473	1.35641		Xcr1	0.00027323	0.00057468	1.316							Zfp629	0.000168475	0.000322931	3.61709
Atad2b	9.10173e-05	0.000135441	1.8364		Ai854517	0.00011984	0.000217545	1.95142		Dbt	0.000273569	0.000575272	5.12737							Zfp64	0	0	5.78751
Gpc3	9.39799e-05	0.000139305	-4.60909		Klhdc10	0.000120094	0.000217934	1.33815		Zdhhc9	0.000284284	0.000597176	2.01978							Zfp653	0.015024	0.0204092	5.03373
Mcm9	9.86789e-05	0.000145285	2.11883		Mrpl9	0.000121619	0.000220519	1.1206		Mroh1	0.000285771	0.000600173	2.02977							Zfp654	0.00549129	0.00824233	3.98264
Cers6	0.000103741	0.000151845	1.04645		Sgo2	0.000123723	0.000224146	1.45917		Tubgcp5	0.000286221	0.000600739	1.2443							Zfp658	0.00665416	0.00980433	4.19218
Rnf146	0.000103841	0.000151936	1.52604		Fxr1	0.00012453	0.000225571	1.08714		Acbd5	0.000294941	0.000618653	1.06352							Zfp672	0.0215111	0.0282999	2.62392
Map2k6	0.000104821	0.000153199	1.50625		Ints9	0.000130995	0.000236842	3.15462		Dqx1	0.000295591	0.000619885	1.52352							Zfp687	0.00105458	0.00181002	2.70421
Mmadhc	0.000106435	0.000155328	1.63486		Gm11696	0.000136867	0.000246812	1.70043		Olfm3	0.000299191	0.000627304	2.63384							Zfp758	0	0	6.79641
Tbl2	0.000107234	0.000156359	1.23051		Mark2	0.000137828	0.000248341	1.13091		Eif2d	0.00030081	0.000630541	5.48335							Zfp763	0.0329953	0.0418349	3.24004
Airn	0.000108408	0.000157934	4.52224		Ctnna2	0.000137984	0.000248581	3.60996		Lpp	0.000300861	0.000630541	4.12469							Zfp78	0.000121912	0.000240801	-3.34626
Ccser1	0.000120806	0.000174168	1.49695		Nlgn2	0.000146643	0.000263701	2.18932		Armcx4	0.000307596	0.00064452	1.00679							Zfp783	0	0	2.49654
Dancr	0.000122116	0.000175895	1.31952		Fam120c	0.000149145	0.000267892	3.1249		Hrk	0.000309307	0.000647834	3.95686							Zfp810	0	0	3.52641
Cenpt	0.000122791	0.000176663	1.02662		Cc2d2a	0.000153047	0.000274539	2.22915		Colec12	0.000321865	0.000673431	2.21228							Zfp862	0	0	3.57122
Cramp1	0.000122881	0.00017677	1.31074		Nop14	0.000159125	0.000284834	5.36915		Sgo2	0.000323132	0.000675799	3.41759							Zfp866	0.0296269	0.0379203	2.18752
Slitrk1	0.0001267	0.000181689	1.56457		Lgr5	0.000165018	0.000294853	2.08598		Adarb2	0.000344781	0.000720625	2.76038							Zfp87	4.543e-08	2.71727e-07	2.15045
Tcirg1	0.000129477	0.000185445	2.3645		Tox	0.00016529	0.000295288	1.12529		Rev3l	0.000356007	0.000743311	3.24371							Zfp870	0.0126563	0.0175164	3.61051
Clcn2	0.000133188	0.000190276	-3.06704		Dcdc2c	0.000166669	0.000297606	1.76079		Fgf9	0.000364145	0.000759826	2.95402							Zfp873	8.48557e-06	2.62107e-05	4.66171
Slc26a2	0.000148083	0.000209954	3.78553		Gm14005	0.000167342	0.000298759	2.28263		Pphln1	0.000377783	0.000787627	4.28061							Zfp942	0.000342484	0.000629947	-2.22211
Rint1	0.000152205	0.000215383	1.30992		Atpaf2	0.000169049	0.000301609	1.10489		Acaa1a	0.000380517	0.000793161	1.59068							Zfp944	7.31988e-10	5.98103e-09	-2.57769
Il1rapl1	0.000152678	0.000216027	1.21548		Bola1	0.000170379	0.000303882	-2.75181		C1qc	0.000381867	0.000795741	1.29457							Zfp953	7.33076e-05	0.000154422	-4.24078
Mtfmt	0.000156335	0.000220936	1.36794		Pdzd2	0.000170471	0.000303997	1.95513		Bcr	0.000381985	0.000795741	1.69465							Zfp956	1.21553e-14	1.47562e-13	3.19232
Cwc27	0.000163402	0.000230317	1.50243		Fermt1	0.000171406	0.000305564	5.50356		Snhg9	0.000381994	0.000795741	3.03992							Zfp963	0.000210131	0.000396549	-3.68215
Cep63	0.000163423	0.000230319	1.13822		Larp1b	0.000171696	0.000305936	2.28624		Gabra3	0.000383202	0.000797594	1.99308							Zhx2	0.039679	0.049505	2.5072
Itprid2	0.000164914	0.000232225	1.93634		Pgap2	0.000172606	0.000307386	1.06835		S1pr1	0.000407092	0.000845734	1.68143							Zic1	5.20686e-11	4.78938e-10	-2.84948
Cd300lg	0.000166951	0.000234871	1.96676		Usp40	0.00017855	0.000317677	2.58416		Hyal3	0.000408528	0.000848539	1.94299							Znf394	0	0	4.17108
Eci2	0.000169288	0.000237987	1.11139		Cherp	0.000180081	0.000320302	1.09885		Hacd2	0.00041107	0.000853465	3.34051							Zkscan2	0	0	5.29029
Pgrmc2	0.000169993	0.00023895	1.18651		Map4k4	0.000180084	0.000320302	1.06092		Ednrb	0.000418897	0.000869354	4.3183							Zkscan5	1.38477e-05	3.89555e-05	-8.15011
Cntn5	0.000174144	0.000244301	1.45941		Sass6	0.000187858	0.000333424	1.5595		Map2k7	0.000435314	0.000902864	2.55161							Zmynd19	2.42956e-09	1.84827e-08	5.05134
Fcrls	0.000174317	0.000244503	2.23843		Ampd3	0.00018833	0.000334098	1.67919		Crocc	0.000436185	0.000904482	2.83253							Znhit6	0.0319823	0.0406584	2.9657
Bbc3	0.000192043	0.000268378	-1.88319		Zfp933	0.000190213	0.000337275	1.6585		Afdn	0.000441605	0.000915532	2.4208							Zranb1	6.65115e-09	4.72458e-08	3.89014
Nptx2	0.000196234	0.000274008	3.67717		Csf2rb	0.000192811	0.000341714	5.40129		Ubr3	0.000448621	0.000929691	2.93666							Zscan18	0.0082398	0.0118932	3.79945
Rsu1	0.000196468	0.000274301	1.1252		Shc4	0.000193947	0.000343504	1.83849		Pdcd7	0.00045656	0.000945947	3.03712							Zscan22	0.0339007	0.0428478	2.08952
Igsf10	0.000204627	0.000285154	5.39142		Pgr	0.000194442	0.000344214	3.00276		Hrh3	0.000458314	0.000949384	2.72432							Zswim4	0.0328947	0.0417165	2.43632
Snx13	0.0002054	0.000286197	2.53977		Trim12c	0.000195617	0.00034607	1.60264		Pirt	0.000462131	0.000956498	2.8592
Cacna2d3	0.000211728	0.000294528	1.47644		Sfxn3	0.000197499	0.00034923	1.86083		Arsk	0.000479515	0.000991863	2.71305
Ppp4r2	0.000212231	0.000295157	1.93596		Napsa	0.000198062	0.000350054	4.35934		Cwc27	0.000486489	0.00100608	5.59756
Tyk2	0.000215062	0.000298953	1.03749		Zfp839	0.000213375	0.000375719	2.49216		Mindy3	0.000499833	0.00103282	3.19024
Ibtk	0.000218272	0.000303308	1.90983		Ercc4	0.000214032	0.000376757	1.51297		Mrpl51	0.000530132	0.00109498	2.50797
Gpr19	0.000225853	0.000313511	2.96131		Glt8d1	0.000218553	0.000384281	4.31738		Itgam	0.000541924	0.0011191	4.87594
Unc50	0.000245567	0.000340235	1.42473		Gfpt1	0.000218597	0.000384297	3.90034		Mageb16-ps1	0.00054249	0.00112004	2.74105
Ccdc88c	0.00024912	0.000345077	5.42613		Ddx27	0.000224817	0.00039504	3.26041		Setd4	0.000552524	0.00114029	5.84211
Bambi	0.000253966	0.000351583	1.65819		Fam21	0.000225712	0.000396548	1.13844		Yrdc	0.000552524	0.00114029	5.84211
Snhg1	0.000257485	0.000356288	2.21184		Gm10785	0.000229706	0.000403242	2.13517		Ooep	0.000564206	0.00116391	2.0503
Ctu2	0.00026092	0.000360999	1.37795		Dlg5	0.000232692	0.000408352	3.75169		Atad3a	0.000579306	0.00119432	4.86722
Syna	0.000263852	0.000364884	-3.19508		Drd1a	0.000239693	0.000420301	3.22025		Lrrc2	0.000590662	0.00121724	3.60083
Ttc39b	0.000265886	0.000367611	1.46645		Lingo1	0.000244731	0.000428996	2.54125		Psd	0.000617076	0.00127094	1.62321
Ddit3	0.000272713	0.000376653	2.8154		Srxn1	0.000254035	0.000444593	2.76576		Fhip2a	0.000617101	0.00127094	1.83586
Akap13	0.000273452	0.000377629	2.23882		Adcy9	0.000254614	0.000445463	2.72323		Chmp4b	0.000623097	0.00128276	3.0555
Sntb2	0.000280115	0.000386604	1.00791		Dkk1	0.000257951	0.000450866	1.19114		Unc79	0.000623518	0.00128336	3.29221
Schip1	0.000280673	0.000387328	1.60069		Psme4	0.000262653	0.000459013	1.40379		Camsap2	0.000628374	0.00129309	1.42034
Mrm2	0.000286388	0.000394984	1.80225		Ppm1g	0.000263741	0.000460839	3.49457		Cngb1	0.000655971	0.00134877	1.05233
Snrpa1	0.000293719	0.000404906	1.96856		Hdlbp	0.000270115	0.0004716	3.398		Camk2d	0.000686423	0.0014108	4.24078
Mir22hg	0.000302327	0.000416287	3.23696		Msl3	0.000270443	0.000472021	2.37309		Steap2	0.000689355	0.00141595	1.62396
Csk	0.000302947	0.000417092	-2.81882		Lrrc7	0.000273732	0.000477685	1.78008		Kif2a	0.000697337	0.00143176	1.63816
Slc6a8	0.000310396	0.000427198	1.51764		Zfp330	0.000280091	0.00048847	1.07324		Mia3	0.000709563	0.00145656	1.93784
Lair1	0.000313058	0.000430736	2.05978		Gm3414	0.000301415	0.00052457	3.59264		Csf3r	0.000711165	0.00145955	2.48809
Phf23	0.000331235	0.000455134	2.4589		Slc35f1	0.000304001	0.000528901	1.50325		Ctcfl	0.000729415	0.00149547	2.09875
Slc31a2	0.000356598	0.000489073	1.09991		Scn4b	0.000305598	0.000531595	1.00716		Tmem45b	0.000731598	0.00149964	1.94628
Phf2	0.000367351	0.000503529	-1.29497		Dusp28	0.000306703	0.000533432	1.82938		Gm5607	0.000735598	0.00150753	1.33015
Pxk	0.000369602	0.000506555	1.78119		Pank4	0.000311699	0.000542035	3.70084		Rabggta	0.000785005	0.0016078	2.75691
Taf9b	0.000378424	0.000518224	1.8011		Ppip5k2	0.000315383	0.000548092	5.15769		Nup133	0.000814583	0.00166803	4.40603
Sgo2	0.00039412	0.000539281	1.06134		Reep3	0.000318759	0.000553784	2.92935		Tbcel	0.000815172	0.0016689	1.05639
Lepr	0.000395801	0.000541393	1.11321		St6galnac6	0.000336857	0.000584854	4.96899		Rbmx	0.000819031	0.00167611	1.82541
Snta1	0.000401915	0.000549437	1.74251		Pola2	0.000348803	0.000605209	2.05011		Cdk8	0.000871084	0.00178082	3.57622
Sel1l3	0.000416583	0.000568962	1.01584		Ccl15	0.000351635	0.000609929	2.16013		Gm20597	0.000873615	0.00178563	1.45226
Pbld1	0.000427118	0.000583081	2.63921		Fibcd1	0.000352323	0.000611025	5.52174		Taf1	0.000876666	0.00179149	1.21487
Pdcd2l	0.000438586	0.000598182	1.6894		Prpf40b	0.000355192	0.000615904	1.60779		Mgst3	0.000880659	0.00179929	-3.85449
Mia2	0.000445843	0.00060787	2.50668		Gjc3	0.000358589	0.000621493	1.34169		Rsph4a	0.000888106	0.00181413	4.37798
Slc31a1	0.000458664	0.000624917	1.65679		Naip2	0.000358643	0.000621493	2.14385		Trio	0.000910055	0.00185783	2.70646
Zfp275	0.000476591	0.000648891	3.73916		Cacul1	0.000358921	0.000621875	1.45086		Nacc2	0.000924697	0.00188733	2.63055
Rnd3	0.000490938	0.000667963	2.01504		Brca2	0.00036699	0.000635553	4.65745		Adipor2	0.000931373	0.00190057	4.2818
Bc005537	0.00049733	0.00067627	1.93752		Ddx52	0.000373904	0.000647321	4.58079		Pid1	0.000947907	0.00193352	1.94086
Med8	0.00052193	0.000708904	2.07221		Gm20172	0.000377898	0.000654132	2.93847		Enah	0.000955042	0.00194768	1.73777
Chpf2	0.000530136	0.000719553	1.22837		Fbxw8	0.000380738	0.000658945	2.38144		Mcm5	0.00096574	0.00196909	4.77053
Spats2l	0.00053718	0.000728947	1.2405		Rint1	0.000384192	0.000664606	2.41797		Xrcc2	0.000971106	0.00197963	2.13246
Trpc2	0.000552459	0.000749076	1.20335		Zscan29	0.000386644	0.000668742	1.41524		Wnk2	0.000983596	0.00200427	6.0429
Ero1a	0.000564084	0.000764576	1.251		Rab3gap2	0.000390117	0.000674642	2.89029		Fxn	0.00100393	0.00204488	2.91525
Acvr1c	0.000580312	0.000786119	2.27821		Tlcd5	0.000392874	0.000679195	2.78911		Scpep1	0.00100635	0.00204939	4.8041
Ino80	0.000605462	0.000818685	1.14964		Ghdc	0.000399604	0.000690501	2.16059		Lrrc3	0.00100912	0.00205462	4.67085
Cep85	0.000623129	0.000842091	1.90251		Lepr	0.000401763	0.000693902	1.37696		Supt7l	0.00101907	0.00207402	1.95405
E2f3	0.00065951	0.00088983	1.58376		Eif4e2	0.000403629	0.000697015	4.31897		Htatsf1	0.00101966	0.00207481	2.02756
Ppp2r2d	0.000659831	0.000890161	1.99575		Nup50	0.000418292	0.000722107	2.21714		Cers4	0.00104949	0.00213506	1.1469
Pias4	0.000684209	0.000922415	1.00437		Unc5d	0.00042033	0.000725511	2.56327		G6pc3	0.0010677	0.00217166	2.1841
Plpp1	0.000685435	0.000923962	3.04503		Pdpr	0.000421325	0.000727113	1.60246		Pex5	0.00107059	0.00217711	1.97767
Cep104	0.000701598	0.000944995	1.20325		Gm7102	0.000421535	0.000727362	2.11388		H2-q4	0.00107158	0.00217868	4.07005
Aph1a	0.000727012	0.000978109	1.07312		Mrps5	0.00043151	0.00074422	1.74147		Dkk1	0.00110649	0.00224828	1.67396
Dhx8	0.000802553	0.0010779	1.48001		Dync2i1	0.000431773	0.000744556	4.11033		Prickle3	0.00111252	0.00226007	3.14598
Tmem245	0.000814382	0.00109341	1.82583		Ptpn7	0.000436007	0.000751383	1.63496		Ercc4	0.00112077	0.00227637	2.02692
Nufip1	0.000842122	0.0011295	1.63774		Echs1	0.00043817	0.000754991	1.59637		Mapk1ip1	0.00117116	0.00237775	-5.16337
Slc25a28	0.000875236	0.00117218	1.52112		Rpgrip1l	0.000441767	0.000761068	1.34413		Rexo2	0.00119619	0.00242808	5.50689
Ufl1	0.000880525	0.001179	1.48868		Igf2r	0.000450435	0.000775634	1.68193		Mettl14	0.00123326	0.0025023	2.96218
Armcx4	0.000947312	0.00126555	1.16568		Ube4a	0.00045829	0.000788788	1.4265		Glt8d1	0.00123354	0.00250237	5.08771
Map4k4	0.000953186	0.00127325	1.01638		Clec16a	0.000459742	0.000791161	2.93861		Pik3r1	0.00123548	0.0025058	3.69131
Ier5l	0.000967528	0.00129139	-4.18423		Chrna1	0.000465765	0.000801274	1.57784		Afap1	0.00123686	0.00250808	3.78919
Rnf26	0.000995006	0.00132656	1.10307		Plekhm2	0.000469072	0.00080671	1.66354		Klhl41	0.00124641	0.00252652	2.02453
Nudcd2	0.0010069	0.00134121	1.66121		Trim41	0.00047331	0.000813357	1.45588		Zfp385c	0.00124646	0.00252652	4.32246
Daglb	0.0010104	0.00134556	1.81498		Tfap2a	0.000474768	0.000815734	1.97321		Sfi1	0.00124671	0.00252652	2.20412
Usp3	0.00102435	0.00136369	1.73115		Uggt2	0.000478274	0.000821453	1.11239		Aqp7	0.00125457	0.00254194	3.28104
Zfyve19	0.00103043	0.00137146	1.62829		Gm17801	0.000498435	0.000854785	1.84146		Snora81	0.00127241	0.00257755	3.97384
Gm17066	0.00104816	0.00139427	1.94684		Tlk2	0.000506282	0.000867696	2.5801		Vmn2r55	0.00128942	0.00261149	1.74674
Lnx2	0.00107361	0.00142749	4.70827		Wiz	0.000510091	0.000874004	2.06005		Cdc14b	0.00129446	0.00262116	4.16239
Csrnp2	0.00108779	0.00144585	1.45587		Phip	0.000510123	0.000874004	2.32161		Nup214	0.00135537	0.00274172	1.6885
Plpp4	0.00110175	0.00146374	2.05189		Kif15	0.000548137	0.00093781	2.57412		Ccdc47	0.00135826	0.00274701	2.24472
Smcr8	0.00110248	0.00146455	2.07121		C5ar2	0.000555075	0.000949234	5.81003		Tbrg3	0.00136417	0.00275841	3.62619
Tmem128	0.00110429	0.0014668	1.6665		Heatr6	0.000556483	0.000951493	1.62604		Smc3	0.00138763	0.00280448	1.59457
Unc45a	0.00110878	0.00147242	1.82369		Ddrgk1	0.000558068	0.000954054	1.8485		Serinc5	0.00142179	0.00287144	2.56183
S100a11	0.0011182	0.0014846	1.05313		Rac2	0.000569058	0.000972538	1.8039		Map4k4	0.00143355	0.00289459	3.23599
Tut1	0.00112866	0.00149798	1.3523		Phlda1	0.00056926	0.000972614	2.10384		Ophn1	0.00144481	0.00291674	1.28254
Sdk2	0.00115871	0.00153631	1.74199		Kcnc1	0.000569281	0.000972614	1.40428		Cblb	0.00144921	0.00292504	4.2025
Focad	0.00117831	0.00156107	1.03683		Mvk	0.000582414	0.000994274	4.69994		Nckipsd	0.00145001	0.00292605	4.5407
Ccl9	0.00121215	0.00160374	1.08488		Vmn1r65	0.00059993	0.00102322	2.00288		Gm11974	0.00145051	0.00292649	2.46106
Svbp	0.00123449	0.00163239	2.41169		Gramd1b	0.00060353	0.0010292	2.29974		Fut9	0.00145491	0.00293476	2.31085
Gtpbp6	0.00123885	0.00163796	1.31629		Snora81	0.000631575	0.00107635	1.70328		Nol3	0.00151435	0.00305281	7.52116
Lrrc8d	0.00124024	0.00163961	2.61794		Gm7609	0.000635141	0.00108209	1.11326		Scn4b	0.00153636	0.00309594	2.90593
Erlin1	0.00130687	0.001725	1.0967		Kcnk6	0.000639845	0.00108993	4.35038		Itm2a	0.00153998	0.00310262	2.29426
Cntn3	0.00132432	0.00174667	3.33843		Lrp6	0.000651691	0.00110994	-2.91081		Fam131b	0.00163021	0.00328308	2.08057
Rab33b	0.00133135	0.00175554	1.00707		Cntnap2	0.000663661	0.00112997	1.78065		Gjc3	0.00163884	0.00329978	1.19095
Ppp1r15a	0.00136455	0.00179731	1.05357		Rbms3	0.000680413	0.00115795	2.78518		Abcd4	0.00164455	0.00331061	3.32658
Samd4b	0.00141374	0.00185878	1.71416		Pofut2	0.000685144	0.00116582	1.72528		Slc24a3	0.00164529	0.00331145	2.55003
Sgk1	0.0014329	0.00188272	2.33392		Nfx1	0.000688045	0.00117031	6.23129		Atf4	0.00164613	0.00331246	2.77571
Mtmr10	0.00145203	0.00190615	1.71898		Mbd3	0.000688103	0.00117031	3.58		Ttc38	0.00164923	0.00331805	2.36236
Riok2	0.00147863	0.00193978	1.92553		Trim25	0.000699229	0.00118868	3.6665		Ecm2	0.00165119	0.00332132	1.42757
Gnpda2	0.00148715	0.0019503	1.14679		Vmn2r29	0.000704148	0.00119667	5.21045		Ceacam20	0.00169992	0.00341728	2.68013
Nt5c1a	0.00153481	0.0020108	1.74013		Nvl	0.000715293	0.00121542	1.67363		Ppwd1	0.00170065	0.00341805	2.31552
Rbm45	0.00156741	0.00205191	1.62594		Tbc1d13	0.00071879	0.00122117	3.67331		Tpmt	0.00172631	0.00346893	1.17475
Tent4b	0.00157584	0.00206226	1.48376		Elovl6	0.000727469	0.00123572	2.24169		B3galnt1	0.00173842	0.00349255	3.62962
Slc38a9	0.00158219	0.00207034	2.24053		Slc35a1	0.000728689	0.00123741	1.64771		Faf1	0.00174005	0.00349513	2.39612
Crim1	0.00158779	0.00207698	1.55151		Heatr5a	0.000733157	0.00124481	3.27815		Cln8	0.00183347	0.00367981	3.23205
Mrps30	0.00159748	0.00208919	1.2056		Zfp131	0.000745176	0.00126482	3.73371		Mlph	0.00183572	0.0036836	2.2697
Gabpap	0.00159771	0.00208925	1.77505		G6pc3	0.00076075	0.00129105	-2.73431		Ptprb	0.00187691	0.00376475	4.14294
Rbm12b1	0.00168439	0.00219822	1.39928		Rdh5	0.000768208	0.0013031	2.72383		Zfp90	0.00192756	0.00386479	2.60593
Nrg1	0.00170864	0.00222937	3.74868		Mucl3	0.000768566	0.00130351	2.69669		Bard1	0.00193121	0.00387133	5.10388
Tctn1	0.0017104	0.00223118	-2.21816		Epha10	0.000775517	0.00131489	3.94718		Fat4	0.00193873	0.00388407	5.9439
Mfsd14a	0.00172608	0.00225113	1.85458		Rpp40	0.000791528	0.00134141	1.89349		Vps26a	0.00199388	0.00399375	2.71257
Aff3	0.00177167	0.00230805	2.77831		Mapkbp1	0.000804428	0.00136285	3.10976		Ranbp2	0.00199541	0.00399602	2.01654
Csf1r	0.00177386	0.00231031	2.70164		Tbrg3	0.000805819	0.00136499	3.39223		Kbtbd7	0.00200272	0.00400986	2.42824
Zfp583	0.00178839	0.00232751	1.07826		Ddx50	0.000842449	0.00142549	1.53108		Prc1	0.00200632	0.00401626	1.88326
Pgap1	0.00182961	0.00237827	4.58239		Fhad1	0.000845358	0.00143019	3.1837		Pde12	0.00200963	0.00402208	3.50745
Wtip	0.00185449	0.00240928	1.61154		Erc1	0.000846656	0.00143217	1.92141		Kin	0.00201837	0.00403877	6.41073
Cyb5r1	0.00190391	0.00247104	1.8765		Cnnm3	0.000850237	0.001438	1.21182		Sco1	0.00204395	0.00408913	1.75833
Clpx	0.00191742	0.00248721	2.14508		Bambi-ps1	0.000851948	0.00144067	2.1485		Rap1gap	0.00210666	0.00421289	1.65402
Tank	0.0019464	0.00252286	2.54657		Naa35	0.000860172	0.00145435	2.10691		Fhip2b	0.00210946	0.00421765	2.17198
Atrip	0.00197467	0.00255781	1.49597		Zfp146	0.00088597	0.00149681	3.64787		Gm14005	0.00218686	0.00436978	2.01457
Usp45	0.00204822	0.00264843	1.85496		Pisd-ps1	0.000891028	0.00150513	2.01392		Fam108b	0.00221584	0.00442504	2.29366
Snhg5	0.00204903	0.00264919	1.50547		Ogn	0.000893923	0.00150978	4.02856		Dcaf17	0.00224006	0.00447252	1.50861
Sstr2	0.00206914	0.00267344	2.54723		Prpf18	0.000895717	0.00151258	1.31805		Rbms2	0.00226165	0.00451472	3.80749
Aif1	0.00207938	0.00268607	2.42869		Cnot9	0.000897356	0.00151511	2.26677		Ppp1r12b	0.00226991	0.00452849	1.4006
Hectd2	0.00209106	0.00269998	1.84479		Tdrd1	0.000905901	0.00152907	3.29705		Gpr35	0.00236846	0.00472229	2.45399
Psph	0.00213113	0.00275021	1.52798		Ehmt2	0.000907236	0.00153108	1.70473		Gm16523	0.00242301	0.00482912	3.20253
Etohi1	0.00213817	0.002759	1.51884		Pacs2	0.000912332	0.00153921	2.62579		Pcgf2	0.00245668	0.00489233	1.8271
Xrcc6	0.0022067	0.002844	1.44434		Abcd2	0.000949811	0.00160046	3.11506		Scrt1	0.00250205	0.00498168	1.32809
Lyset	0.00226971	0.00292298	2.11421		Acsm2a	0.000954483	0.00160784	2.52857		Scin	0.00258248	0.00513977	5.26038
Stimate	0.00231232	0.00297526	1.0436		Mical3	0.000982256	0.00165386	2.55785		Ucp2	0.00261846	0.00521034	2.70779
Polr3a	0.00232648	0.00299216	1.6457		Mcat	0.000998637	0.0016804	2.51541		Fkbp5	0.00262647	0.00522524	2.93933
Cib1	0.00235479	0.00302693	1.35438		Efr3b	0.00100136	0.00168472	3.08124		Acin1	0.00264573	0.00526251	3.47489
Znfx1	0.00236073	0.00303388	1.6894		Nos1ap	0.00101367	0.00170518	1.02856		Clmn	0.00268445	0.00533741	2.35239
Nars2	0.00237515	0.00305044	1.78977		Ai506816	0.0010276	0.00172808	1.27047		Igf2r	0.00268633	0.00534007	1.52551
Phf1	0.00240702	0.00308834	2.21095		Sem1	0.00105863	0.00177889	1.81346		Zfp395	0.00268718	0.00534071	2.61568
Trmt44	0.00241512	0.0030984	2.62843		Rbm6	0.00107217	0.00180108	2.05909		Nhlh2	0.00272933	0.00542125	1.36416
Kmt2b	0.00241557	0.00309864	1.38838		Aptx	0.00109622	0.00184119	3.28651		Gm9926	0.00279039	0.00553924	2.23071
Unc13b	0.00243565	0.00312236	3.72221		Ceacam20	0.00111837	0.00187782	1.19496		Elovl5	0.00285441	0.00566183	4.87932
Snx29	0.0024769	0.00317352	1.54523		Nr1d2	0.00112908	0.00189551	1.50725		Fbll1	0.00285552	0.00566289	2.47874
Cenpf	0.0025187	0.00322533	1.6083		Cdnf	0.00112993	0.00189627	2.21054		Fam161b	0.00288095	0.00571219	1.77756
Slc25a1	0.00257405	0.00329263	1.94003		Fnbp1l	0.00113005	0.00189627	1.40778		Ube2c	0.00290415	0.00575591	1.20109
Sptlc2	0.00260865	0.00333475	1.17536		Exoc6b	0.00114797	0.00192545	2.96413		Endod1	0.00291447	0.00577522	2.24918
Mapk6	0.00261923	0.00334788	2.36896		Myh9	0.00115687	0.00194008	1.35846		Slc35d1	0.00292956	0.00580398	1.61164
Dolpp1	0.00262328	0.0033527	1.71957		Snhg5	0.00115956	0.0019443	2.82034		Zc3h12a	0.00294617	0.00583573	2.50856
Mirg	0.00270626	0.00345454	3.5582		Riok3	0.00116223	0.00194848	1.63661		Dph5	0.00296174	0.00586541	5.00034
Fam219a	0.00272988	0.00348215	2.71977		Fgf10	0.00117613	0.00197147	1.91545		Larp1	0.00297943	0.00589927	2.82223
Plcxd1	0.00276444	0.00352221	2.69088		Cers2	0.00118441	0.00198474	2.14396		Plekha5	0.00310299	0.00613906	1.25498
Sult2b1	0.00276619	0.00352389	2.68516		Akt2	0.00118563	0.00198648	1.59101		Mllt10	0.00312835	0.00618679	2.91597
Pign	0.00283376	0.0036049	1.26174		Pirt	0.00119012	0.00199369	2.0596		Asap3	0.00314047	0.00620952	1.85717
Olfml3	0.0028393	0.00361156	3.36854		Stimate	0.00119858	0.00200725	6.36235		Tti2	0.00321683	0.00635925	2.57898
Msi2	0.00284487	0.00361826	1.67481		Lpar1	0.00121386	0.00203254	1.47055		Prp4k	0.00329355	0.00650963	2.24128
Atl2	0.00286967	0.00364863	1.70425		Mul1	0.00122182	0.00204554	1.35241		Cacul1	0.0032982	0.00651753	3.15029
Mib1	0.00287271	0.00365131	1.55211		Lipi	0.00122376	0.00204848	1.0551		Skint4	0.00334023	0.00659799	3.9975
Nagpa	0.00290486	0.00369177	1.36588		Flnb	0.0012375	0.00207053	4.90079		Poglut3	0.00336943	0.00665435	2.19593
Prrc1	0.00295461	0.00375338	1.19902		Grsf1	0.00125552	0.00210003	1.5995		Marchf2	0.00339453	0.00670258	4.59254
Sphk2	0.00298083	0.00378548	1.07132		Ttc28	0.00125756	0.00210313	1.34097		Tnfsf10	0.00339801	0.00670813	2.31571
Gm14325	0.00303553	0.00385162	1.08227		Chfr	0.00126423	0.00211363	1.89639		Acsm2a	0.00340407	0.00671876	1.9706
Slc30a5	0.00306361	0.00388599	1.46486		Coprs	0.00127642	0.00213206	1.42715		Mcph1	0.00340949	0.00672813	4.73198
Slc16a14	0.00306972	0.00389291	1.21218		Magi2	0.00128367	0.00214318	1.86787		Dync2h1	0.00341868	0.00674495	1.56601
Mtap	0.00307966	0.00390468	1.82144		Stx8	0.00132138	0.00220513	2.77345		Cd300lg	0.00349894	0.00690058	3.17153
Pnkp	0.00315475	0.00399644	1.67727		Ryr1	0.00134423	0.00224257	3.23025		Jade2	0.00352009	0.00694092	4.0316
Gsg1l	0.00319882	0.00404966	2.16785		Gm10390	0.00137808	0.00229834	3.62681		Zfp697	0.00354422	0.00698712	1.60273
Rell1	0.0032489	0.00410821	6.36541		Ddx39a	0.00139585	0.00232727	1.88782		Fam219b	0.00356407	0.00702487	1.27794
Mfn1	0.00325916	0.00412031	2.0624		Slitrk4	0.0014168	0.00236112	4.30463		Phf14	0.00365513	0.00720008	3.11333
Zcchc10	0.00329477	0.00416265	1.20009		Acad10	0.00142055	0.002367	1.87967		Akap8	0.00375673	0.00739586	2.20848
Rrp1b	0.00330607	0.00417514	1.48043		Cluap1	0.00142148	0.00236819	5.2962		Rgs17	0.00380329	0.00748457	1.85287
Nanog	0.00343164	0.00432677	1.54163		Xrcc2	0.00147512	0.00245606	1.26044		Crx	0.00381031	0.00749691	2.22077
Gdpd5	0.00343882	0.00433536	2.12041		Prpf4	0.00148553	0.00247264	5.14458		Gask1b	0.00382865	0.00753151	2.3314
Chmp1b	0.00346292	0.00436435	2.0354		Ap1s3	0.00149621	0.00249004	3.0258		Rnf20	0.00385043	0.0075699	3.01009
Iqcb1	0.00356399	0.00448693	1.63071		Slc23a1	0.00151407	0.00251899	3.22058		Lrrn4cl	0.00389043	0.00764551	1.7665
Ttll11	0.00359746	0.00452714	1.87632		Nfasc	0.00157205	0.00261346	2.24719		Ccdc50	0.00389267	0.00764843	1.78778
Vps54	0.0036635	0.00460582	2.47984		Osbpl8	0.0015745	0.00261714	1.24506		C2cd2	0.00393245	0.00772354	2.21125
Poglut2	0.0037039	0.00465413	1.5849		Acadl	0.00159943	0.00265737	6.21274		Zbtb49	0.00395179	0.00776001	2.27005
Sppl2b	0.00371402	0.00466487	2.61347		Dab2ip	0.00161071	0.00267528	3.3055		Psg23	0.0039611	0.00777677	5.77288
Per2	0.00376218	0.00472033	2.40543		Pak6	0.00161166	0.00267646	3.07255		Galntl6	0.00396256	0.00777811	2.46057
Tbc1d20	0.00393573	0.0049276	1.66895		Slc12a6	0.00161234	0.00267718	1.32141		Gmeb2	0.00405385	0.00795262	3.67685
Slc2a1	0.00395381	0.00494865	1.00395		Pcsk5	0.00169037	0.00280461	4.53855		Cyb5d2	0.0041176	0.00807609	3.23585
Ldb2	0.00397469	0.00497268	6.77385		Usp36	0.001695	0.00281186	2.63911		Cnot6l	0.00412855	0.00809597	4.56245
Rb1	0.00399949	0.00500159	1.05769		Ntng2	0.0017033	0.00282478	1.39169		Shank1	0.00420209	0.00823857	2.91544
Rbm41	0.00401478	0.00501964	1.28291		Prr14	0.00170797	0.0028321	1.83817		Slc18b1	0.00424525	0.00831829	2.4988
Ogg1	0.00402001	0.00502566	3.18087		Dcaf5	0.00171557	0.00284382	3.73036		Tspan15	0.00424969	0.00832537	3.0503
Rrp9	0.00402857	0.00503582	1.29446		Slc7a2	0.00179391	0.00297008	3.82777		Kcnh1	0.00425314	0.00833048	1.47662
Cog5	0.00410439	0.00512679	1.68288		Larp7	0.00182806	0.00302434	1.34395		Bc018507	0.00430592	0.00843221	1.06707
Fam185a	0.00411372	0.00513791	1.83529		Sorcs3	0.00188887	0.00312447	2.39089		Gdf3	0.00434791	0.0085111	2.04439
Itfg2	0.00421259	0.0052575	1.70096		Blvrb	0.00191091	0.00315997	4.08607		Clec4a2	0.00435191	0.00851728	2.61315
Elmo1	0.00422667	0.00527395	2.86426		Prcc	0.0019115	0.00316047	4.73204		Vapb	0.00438024	0.00857103	2.44729
Gclm	0.00423236	0.00528049	1.71969		Hepacam	0.00191209	0.00316095	1.80314		Carmil3	0.0043852	0.00857907	5.14174
Nkx2-1	0.00424291	0.00529197	1.40315		Mtfmt	0.00192465	0.00318124	3.09723		Cd22	0.00443259	0.00866669	1.46346
Aloxe3	0.00437697	0.00545112	1.1144		Zfp941	0.00194623	0.00321642	1.28107		Tor1aip2	0.00448057	0.00875879	3.08534
Slc4a1ap	0.00437969	0.00545393	1.97595		Mdga2	0.00198054	0.00327115	1.39212		Ell2	0.00451556	0.00882375	2.25308
Itgb3	0.00438635	0.00546165	1.12312		Gprc5c	0.00198232	0.00327359	2.177		Fam83a	0.00453159	0.00885334	1.50507
Cd33	0.00441646	0.0054974	3.07669		Daxx	0.00199473	0.00329308	1.99018		Dpysl2	0.00458779	0.00895963	3.84201
Miip	0.00444641	0.00553293	1.5058		Zfp605	0.00200637	0.0033108	2.13166		Xkr8	0.00461559	0.00901216	3.00645
Ttr	0.00450907	0.00560972	4.88092		Cemip2	0.00201344	0.00332196	1.50384		Fbxl17	0.00471793	0.00921019	1.55312
Abhd3	0.00457769	0.00568908	1.93682		Slitrk3	0.00201455	0.00332328	1.87804		Cybrd1	0.00482015	0.00940607	3.04816
Flvcr1	0.00463182	0.0057492	1.14901		Plod3	0.00201665	0.00332626	2.86206		Kif15	0.00489249	0.00954538	2.37933
Lrrc3	0.00464389	0.00576286	1.49869		Tbc1d20	0.00205602	0.00339017	3.35627		Tmc2	0.00491611	0.00958771	1.89017
Psme4	0.004649	0.00576859	1.95408		Tll1	0.00205965	0.00339563	1.76829		Lifr	0.00494023	0.00963286	2.21563
Kcnj4	0.00466109	0.00578238	1.03618		Sema3c	0.00206787	0.00340868	3.30135		Rapgef1	0.00496281	0.00967501	1.17874
Adcy8	0.00466672	0.00578867	2.12214		Hexim1	0.00207129	0.0034138	2.28516		Rgs9	0.00502105	0.00978664	2.89773
Gtpbp10	0.00474786	0.00588569	1.36674		Rnase4	0.00207582	0.00342075	1.65158		Gigyf2	0.00502966	0.00980152	2.2538
Sptssa	0.00483463	0.00598759	1.07999		Ablim1	0.00208776	0.00343991	1.48556		Mrgpre	0.00511474	0.00996537	4.00541
Rwdd4	0.00484503	0.00599984	2.10441		Ly86	0.00209422	0.0034495	5.6798		Dock4	0.00511959	0.00997288	1.00591
Nfkbil1	0.00484856	0.00600295	1.74566		Ddit3	0.00210561	0.00346774	2.91029
Hcn1	0.00485689	0.00601137	2.71691		Acot11	0.0021176	0.00348644	3.56403
Trmt61a	0.00491201	0.00607577	1.12922		Prr5l	0.00212496	0.00349802	4.29714
Sap30l	0.00501848	0.00620032	2.17939		Itgb6	0.0021334	0.00351086	1.3061
Mrps9	0.00511295	0.00631109	1.53729		Cdh4	0.00213374	0.00351089	5.93407
Plod2	0.00519642	0.00640808	1.78499		Mmp17	0.00214441	0.00352739	1.78366
Cd53	0.00521114	0.00642489	4.54462		Mmadhc	0.00215414	0.00354287	2.04714
Spag1	0.00527731	0.00650308	1.82676		Zdhhc1	0.00220504	0.0036244	2.99576
Tox3	0.00529293	0.00652097	1.83036		Slx1b	0.00222278	0.00365301	2.41838
Tmem41b	0.00535467	0.0065929	1.97357		Itfg2	0.00222574	0.00365674	1.64572
Robo3	0.00539879	0.00664445	1.78442		Zfp558	0.00223365	0.00366866	4.6916
Rhox8	0.00542305	0.00667221	1.55373		Zfp956	0.00225021	0.0036953	4.04455
Asb6	0.00553645	0.00680819	1.85266		Wrap53	0.00225721	0.00370623	1.04888
Fancg	0.00560072	0.00688292	1.43035		Slc6a20b	0.00226536	0.00371851	2.25014
Chfr	0.00561906	0.00690402	1.73286		Atp13a3	0.00226823	0.00372266	2.13802
Rorb	0.00562647	0.0069124	2.18798		Rb1cc1	0.00228091	0.00374289	2.78347
Fat3	0.0056401	0.0069277	1.5053		Iglon5	0.0023264	0.00381526	3.12542
Mix23	0.00571899	0.0070195	2.1193		Tnip2	0.00232969	0.00382007	4.66893
Kcnk2	0.00577294	0.00708423	-1.83024		Usp42	0.00235231	0.00385601	2.37612
Mmgt1	0.00578628	0.00709826	1.91993		Crtc3	0.00239844	0.00392927	1.15515
Snap29	0.00581463	0.00713168	1.58286		Unc13a	0.00240541	0.0039395	2.0385
Retreg3	0.00585197	0.00717599	1.07683		Lmbr1	0.00241243	0.0039504	3.89237
Cldn12	0.00587377	0.00720048	1.06823		Pou3f2	0.00243042	0.00397887	1.3559
Manea	0.00591284	0.00724687	1.23756		Gpr158	0.00245639	0.00401998	2.84786
Zfp420	0.00593438	0.00727175	1.47314		Gpr162	0.0024673	0.00403662	2.28601
Prss36	0.00599941	0.0073484	-3.24059		Zfp174	0.00248065	0.00405786	5.14317
Slc22a5	0.00610868	0.00747292	3.38474		Gm10069	0.00248433	0.00406327	2.18085
Evi5l	0.00610992	0.00747366	1.2282		Slc16a2	0.00248498	0.00406372	2.09141
Rad17	0.00620483	0.00758582	1.93197		Map3k9	0.0024872	0.00406675	3.42998
Tepsin	0.00623075	0.00761673	1.37154		Dph7	0.0025859	0.00422244	1.62864
Stx1b	0.00628056	0.00767443	2.21369		Slc25a1	0.00260011	0.00424501	1.12209
Usp1	0.00638629	0.00779798	1.56495		Snrnp48	0.00262315	0.0042807	1.64303
Uimc1	0.0064035	0.00781737	1.33542		Nup153	0.00262474	0.00428265	3.7728
Lhfpl6	0.00645729	0.00787978	1.21355		Snx7	0.00262876	0.00428857	1.58865
Tln1	0.00648147	0.00790846	1.80144		Vps11	0.0026665	0.00434885	1.65342
Mbd2	0.00653396	0.00796922	1.4716		Micu1	0.00267071	0.00435505	2.24089
Eaf1	0.00656482	0.0080052	4.7697		Arid5b	0.00269782	0.00439862	4.03183
Dmac2l	0.00662651	0.00807709	1.15029		Sytl2	0.00270699	0.0044129	5.57218
Slc19a2	0.00663789	0.00808928	1.0557		Slc35g2	0.00272573	0.00444213	2.71474
Dnttip1	0.00671416	0.00817801	1.17769		Orc4	0.00272704	0.0044436	2.13888
Tbk1	0.00678465	0.00826046	2.11744		Plekhh2	0.00274865	0.0044768	4.2171
Gm8179	0.00683748	0.00832048	3.91247		H2-d1	0.00285717	0.00465008	5.43802
Gas2l3	0.00685197	0.00833726	1.74111		Pgrmc2	0.0028615	0.00465644	2.02171
Bloc1s6	0.00699474	0.00850396	1.31453		Necab1	0.00287034	0.00467013	2.27621
Olfm4	0.00700365	0.00851304	2.55537		Slc15a1	0.00299261	0.00486255	1.93661
Chac1	0.00701093	0.00852102	3.0331		Tenm4	0.00306483	0.00497767	1.37938
Blzf1	0.0070791	0.00859766	1.77158		Tbc1d15	0.00306798	0.00498205	3.22081
Rnf217	0.0073781	0.00894699	5.0203		Kdsr	0.00311149	0.00504895	3.01069
Znf276	0.00742466	0.0090016	1.81361		Kdelr1	0.00311602	0.00505555	1.44622
Zfp334	0.00752695	0.00912281	4.78044		Pomgnt1	0.00312187	0.00506428	2.34936
Kremen1	0.00762224	0.00923355	5.83517		Cx3cr1	0.00314786	0.00510416	2.2426
Cdc7	0.00765138	0.00926696	1.42457		Slc37a4	0.00315283	0.00511147	3.94028
Tyw5	0.00772433	0.00935147	1.59043		Bc030476	0.00316035	0.0051229	1.66505
Taf7	0.00776864	0.00940206	1.42768		Kansl1	0.00318028	0.00515368	1.50929
Heatr5b	0.00779822	0.00943511	1.39569		Ints5	0.00318729	0.00516428	1.8249
Gap43	0.00780188	0.00943857	1.36995		Unc5c	0.0031993	0.00518296	1.82606
Emp2	0.00780625	0.00944289	2.23134		Sigmar1	0.00321461	0.00520545	-2.97278
Pcdh11x	0.00811324	0.00979918	3.65059		Fbxo46	0.00323553	0.00523829	1.00553
Nudt14	0.00817617	0.00987315	1.07238		Pik3c2a	0.00323585	0.00523829	1.32747
Ly96	0.00817943	0.00987608	3.53385		Maf	0.00328433	0.00531598	2.24864
Lgals8	0.00828029	0.00999276	1.34254		Crx	0.00334334	0.00540748	1.65319
Cpne3	0.00828502	0.00999744	1.0664		Gm19434	0.00342	0.0055282	1.22315
					Mfap3l	0.00344156	0.00556222	1.26532
					Galntl6	0.0034533	0.00558037	1.82814
					Vegfa	0.00348213	0.00562613	2.37335
					Slc16a1	0.00359836	0.00580877	1.70225
					Slc39a7	0.00361836	0.00584018	2.58733
					Tpp1	0.00363904	0.0058727	1.38886
					Eif4e3	0.00364601	0.00588308	1.35823
					Fert2	0.00365579	0.00589799	2.86493
					Pag1	0.00367187	0.00592305	1.62567
					Dcdc2	0.0036843	0.00594222	3.62689
					Wdr24	0.00369447	0.00595774	3.166
					Tgfbr2	0.00370591	0.00597532	2.47342
					Klhl29	0.00374971	0.00604326	1.23028
					Brwd3	0.00375919	0.00605765	2.01943
					Dph5	0.00379694	0.00611666	4.88242
					Zic1	0.00381611	0.00614393	2.34002
					Ano2	0.00384244	0.0061854	3.4628
					Psg28	0.00385943	0.00621183	1.58492
					Sp110	0.00390641	0.00628653	1.56296
					Clip1	0.00394429	0.00634562	2.09847
					Timm50	0.00395196	0.00635701	1.87591
					Ppp1r37	0.00398606	0.00640809	2.55345
					Prss23	0.00402591	0.00647121	5.28681
					Pmvk	0.00405953	0.00652333	4.67896
					Bbs1	0.00411951	0.00661776	1.12881
					Zbtb10	0.004121	0.00661918	3.723
					Anapc1	0.0041261	0.0066264	1.20187
					Camsap1	0.00412837	0.00662906	2.78316
					Nanog	0.00415373	0.00666783	1.85295
					Gsr	0.00422033	0.00677374	1.29274
					Fndc5	0.00424913	0.00681796	1.53168
					Slc35e4	0.00428862	0.00687931	2.08658
					Mix23	0.00432427	0.00693242	1.2478
					Mrps9	0.0043464	0.00696688	1.58416
					Ndst4	0.00435875	0.00698564	2.09864
					Polr1b	0.004372	0.00700585	2.04087
					Tet3	0.00449443	0.00719465	2.92356
					Mtx3	0.0045196	0.00723221	3.4318
					Rab34	0.00453251	0.00725136	2.55512
					Mtrex	0.0045468	0.00727315	2.23067
					Gask1b	0.00458221	0.00732871	2.10297
					H2-t23	0.0046284	0.00740014	1.9016
					Slc11a2	0.00480236	0.00766959	4.45337
					Npc1	0.00480523	0.00767192	3.26932
					Uchl3	0.00482665	0.00770387	-4.57979
					Brsk1	0.00483847	0.00772161	1.96233
					Itsn2	0.00486077	0.00775493	1.96464
					Tmod3	0.00487642	0.00777877	1.67937
					Eif2s3x	0.00493856	0.00787444	2.6873
					Dnm3os	0.00497689	0.00793439	4.68059
					Sec24a	0.00502837	0.00801413	3.17684
					Ttpal	0.0050586	0.00806113	2.3697
					Dnase2a	0.00509472	0.0081175	2.57858
					Pcyt1b	0.00510849	0.00813826	1.84811
					Nuf2	0.0051172	0.00815094	2.65968
					B4galnt2	0.00515775	0.00821433	1.82546
					Nasp	0.00523176	0.00832856	1.81236
					Pygo2	0.00523767	0.00833675	3.14482
					Prkx	0.0052656	0.00837998	4.28034
					Trem2	0.00526851	0.00838246	1.79181
					Cd300lf	0.00526869	0.00838246	1.15709
					Slc39a9	0.00535657	0.00851979	1.7982
					Tmem145	0.00536031	0.0085245	1.17
					Lef1	0.00537516	0.00854563	4.05932
					Usp33	0.00538333	0.00855737	1.99739
					Gdf3	0.005385	0.00855829	1.36366
					Chd8	0.00539968	0.00857961	1.91303
					Vmn2r55	0.00548488	0.00871373	2.14851
					Dnajb2	0.00549236	0.00872434	1.83713
					Ptk6	0.00551559	0.00875996	1.86563
					Cd93	0.0056336	0.00894348	1.46086
					Satb1	0.00565707	0.00897944	1.90949
					Gpatch2	0.0057725	0.00916	4.80991
					Psme3ip1	0.00582342	0.00923811	1.13028
					Lats1	0.00585404	0.00928534	1.78135
					Tbx5	0.00594509	0.00942291	1.37676
					Zfp451	0.00601504	0.00952964	3.22307
					Kdm2a	0.00602614	0.00954445	1.98061
					Mrps15	0.00606502	0.00960339	1.27218
					Efl1	0.00606511	0.00960339	2.70904
					Aplp2	0.00613603	0.00971426	4.12676
					Cul9	0.00613805	0.00971606	1.68506
					Kctd12b	0.00615867	0.00974729	1.43688
					Nat8	0.00626157	0.00990396	1.29893
					Zfp9	0.0062622	0.00990396	1.2265
					Sirt1	0.00631475	0.00998563	1.15353
