# Supplementary material for: Theoretical framework for the difference of two negative binomial distributions and its application in comparative analysis of sequencing data
Source: HighWire-hosted journal article supplement (doi:10.1101/gr.278843.123), 2024-10-01
Supplement: Supplemental_Table_S12.xlsx [file Supplemental_Table_S12.xlsx]

## Sheet: Sheet1
Supplementary File S12: Functional annotations of DEGs uniquely detected by DEGage from the Rao-Ruiz dataset.
Gene	Full Gene Name	General Function Annotation	Up/down Regulation under Fear Conditioning	Potential Memory-related Function	Reference (PMID)
Acot1	Acyl-CoA Thioesterase	Acetyl-CoA metabolism	Down	Although ACOT1's relationship to fear memory formation has not been directly characterized, acetyl-CoA plays a critical role in histone acylation, which is a key regulator of memory formation. Therefore, it makes sense that enzymes promoting acetyl-CoA metabolism would be downregulated.	35921439
Itih3	inter-alpha-trypsin inhibitor heavy chain 3	Extracellular matrix stabilization through hyaluronic acid binding	down	ITIH3 variants have been associated with memory consolidation and hippocampal connectivity deficits in autism	32251353
Ccdc103	coiled-coil domain 103	Enables protein homodimerization in axonemal dynein complex assembly (cillial structure)	down	Cilium related genes play substantial role in remote memory	34142063
Acadl	Acyl-CoA Dehydrogenase Long Chain	Catalyzes B-oxidation to form Acetyl-CoA.	up	Not directly characterized, however, an upregulation of acetyl-CoA production would be necessary for histone acetylation.	35921439
Sdk1	Sidekick cell adhesion molecule	Adhesion molecule that promotes synaptic connectivity	Up	Essential in stabilization of neural circuits	32359437
Gng4	G protien subunit gamma 4	Enables G-protien beta-subunit binding	Up	Decreased GNG4 expression is associated with poorer memory	29338302
Fmnl3	Formin like 3	Regulates cell morphology and cytoskeletal organization	Up	FMNL2/3 mutations are associated with mental retardation, including memory deficits.	30227168
Cavin1	RNA polymerase 1 and transcript release factor	Enables dissociation of ternary RNA pol 1 transcription complexes from 3' gend of pre-rRNA transcripts. Also involved in caveola formation	Up	Unclear
